# Supplementary material for: Acetylation-Specific Interference by Anti-Histone H3K9ac Intrabody Results in Precise Modulation of Gene Expression
Source: Int J Mol Sci. 2022 Aug 10;23(16):8892. doi: 10.3390/ijms23168892 (PMC9408029; doi:10.3390/ijms23168892)
Supplement: Supplementary file 1 [file ijms-23-08892-s001.zip › Dataset S1.xlsx]

## Sheet: scFv58F_vs_DMSO
	baseMean	log2FoldChange	lfcSE	stat	pvalue	padj
YBR072W	810.381	1.58672	0.0833034	19.0475	6.89646e-81	4.59304e-77
YPL240C	3673.73	1.16092	0.0732532	15.848	1.45133e-56	4.83293e-53
YIR042C	281.779	-1.65958	0.11362	-14.6065	2.55457e-48	5.67114e-45
YNR034W-A	8029.48	1.06726	0.0761918	14.0075	1.40279e-44	2.33565e-41
YHR030C	2010.89	-0.884191	0.0659731	-13.4023	5.86148e-41	7.8075e-38
YDL014W	1933.59	-1.00372	0.0759802	-13.2103	7.65254e-40	8.49432e-37
YAL005C	6579.43	0.885285	0.0686091	12.9033	4.31136e-38	4.10195e-35
YDR171W	7311.83	0.790952	0.0620333	12.7504	3.09978e-37	2.58057e-34
YLR194C	5592.53	-0.916394	0.0719278	-12.7405	3.52231e-37	2.60651e-34
YGR159C	1183.12	-0.9938	0.0788814	-12.5987	2.14774e-36	1.4304e-33
YLL026W	11057.6	0.738774	0.0592894	12.4605	1.22652e-35	7.426e-33
YAL003W	7836.64	-0.677294	0.0545092	-12.4253	1.90477e-35	9.94142e-33
YOR294W	460.932	-1.20264	0.0968011	-12.4238	1.94052e-35	9.94142e-33
YGL255W	1731.54	-1.13875	0.0923087	-12.3364	5.76987e-35	2.74481e-32
YJL133C-A	4302.27	0.690015	0.0564652	12.2202	2.42579e-34	1.07705e-31
YGR142W	1827.89	1.92298	0.157683	12.1952	3.29737e-34	1.29179e-31
YJL122W	406.072	-1.24186	0.101801	-12.1989	3.15011e-34	1.29179e-31
YMR096W	2049.37	0.790564	0.0658409	12.0072	3.25719e-33	1.20516e-30
YDR343C	12720.5	0.868972	0.0733777	11.8425	2.35425e-32	8.25226e-30
YLR300W	1899.75	-0.772508	0.0656873	-11.7604	6.24458e-32	2.07945e-29
YBR078W	7249.56	-0.784852	0.0669746	-11.7187	1.02281e-31	3.24376e-29
YDR342C	16000.8	0.849429	0.0726278	11.6957	1.3415e-31	4.0611e-29
YGR138C	853.502	-1.02114	0.088175	-11.5808	5.15449e-31	1.49256e-28
YOR027W	3358.01	0.712546	0.0617048	11.5477	7.58563e-31	2.10501e-28
YAL053W	1964.55	-0.729199	0.063227	-11.533	8.99195e-31	2.39545e-28
YAL004W	1757.99	0.832471	0.0726207	11.4633	2.01747e-30	5.16782e-28
YDL048C	676.393	-1.02909	0.0903615	-11.3886	4.76517e-30	1.17541e-27
YOR095C	1255.23	-0.759888	0.0668223	-11.3718	5.77965e-30	1.37473e-27
YBR092C	661.249	-1.03842	0.0915028	-11.3486	7.53976e-30	1.73155e-27
YER036C	1474.57	-0.875549	0.0775302	-11.293	1.42075e-29	3.15406e-27
YBR169C	2208.31	0.716307	0.0635627	11.2693	1.86052e-29	3.99712e-27
YPR074C	2706.38	-0.772647	0.0686975	-11.2471	2.39351e-29	4.98148e-27
YBL078C	2105.8	0.717351	0.0638316	11.2382	2.64782e-29	5.20201e-27
YDR055W	2288.41	-0.755033	0.0671862	-11.2379	2.65568e-29	5.20201e-27
YIL162W	2395.97	0.777749	0.0701153	11.0924	1.36538e-28	2.59813e-26
YLR216C	3798.53	0.649412	0.0585789	11.0861	1.46533e-28	2.71087e-26
YHR087W	3996.59	0.6925	0.062655	11.0526	2.12963e-28	3.83333e-26
YPR103W	3088	0.625506	0.05668	11.0357	2.56902e-28	4.50255e-26
YNL335W	452.402	-1.35202	0.12362	-10.9369	7.67445e-28	1.28168e-25
YNL015W	2174.78	0.78168	0.0714734	10.9367	7.69781e-28	1.28168e-25
YBL039C	571.755	-0.977931	0.0894708	-10.9302	8.26908e-28	1.34322e-25
YHR094C	1793.91	-0.858693	0.0786567	-10.917	9.56266e-28	1.51636e-25
YNL244C	4730.02	-0.688429	0.0630848	-10.9127	1.00182e-27	1.55166e-25
YBR101C	2972.41	0.715366	0.06567	10.8933	1.23999e-27	1.87689e-25
YJL144W	1400.34	0.827998	0.0760487	10.8877	1.31866e-27	1.95162e-25
YFL061W	421.364	-1.35315	0.124542	-10.865	1.69178e-27	2.4494e-25
YOL032W	1335.59	0.719236	0.0664534	10.8232	2.67388e-27	3.78895e-25
YOR224C	1536.39	-0.765485	0.070746	-10.8202	2.7622e-27	3.83255e-25
YLR286C	8693.44	0.831648	0.0768766	10.818	2.82975e-27	3.84615e-25
YER150W	1695.33	0.70228	0.0654552	10.7292	7.42506e-27	9.89018e-25
YGL225W	493.195	-1.08061	0.10161	-10.6349	2.05074e-26	2.67802e-24
YHR128W	986.768	-0.813461	0.0765586	-10.6253	2.27189e-26	2.90977e-24
YLR120C	1623.25	-0.736478	0.0695937	-10.5825	3.59115e-26	4.51266e-24
YDR155C	16535.9	0.518447	0.049003	10.5799	3.6931e-26	4.55482e-24
YBL042C	1004.41	-0.853182	0.0810883	-10.5216	6.86675e-26	8.31501e-24
YJL052W	18104.8	0.769757	0.073226	10.5121	7.60076e-26	9.03948e-24
YCR024C-B	1246.87	-0.980926	0.0933352	-10.5097	7.79268e-26	9.10513e-24
YJR016C	2768.56	-0.652133	0.0624547	-10.4417	1.59949e-25	1.83665e-23
YCR013C	21170	0.684859	0.0657554	10.4152	2.11246e-25	2.38457e-23
YDR545W	508.162	-0.912524	0.089077	-10.2442	1.2564e-24	1.34962e-22
YLR467W	508.162	-0.912524	0.089077	-10.2442	1.2564e-24	1.34962e-22
YOR396W	508.162	-0.912524	0.089077	-10.2442	1.2564e-24	1.34962e-22
YJR148W	2051.29	0.704821	0.0689021	10.2293	1.4655e-24	1.54924e-22
YPR016C	1470.96	-0.725826	0.0711197	-10.2057	1.86975e-24	1.94571e-22
YOL124C	234.445	-1.25453	0.123591	-10.1506	3.29326e-24	3.37433e-22
YDR154C	10315.6	0.514469	0.0507896	10.1294	4.09071e-24	4.06628e-22
YLR217W	828.425	0.781443	0.0771441	10.1296	4.08127e-24	4.06628e-22
YMR256C	2464.5	0.748335	0.0739244	10.123	4.36953e-24	4.27957e-22
YGL191W	6932.24	0.634814	0.0630941	10.0614	8.18466e-24	7.89998e-22
YLR286W-A	662.194	1.03028	0.102796	10.0226	1.21292e-23	1.15401e-21
YCR024C-A	788.03	-1.00282	0.100095	-10.0187	1.26201e-23	1.1838e-21
YJR008W	2340.94	0.658776	0.066026	9.97753	1.91168e-23	1.76831e-21
YLR327C	47451.7	0.746316	0.0749814	9.95335	2.43828e-23	2.22451e-21
YCR012W	51785.6	0.617704	0.0622642	9.92071	3.38355e-23	3.04519e-21
YKL043W	787.159	-0.973758	0.0984666	-9.88923	4.63584e-23	4.11662e-21
YDL070W	2336.61	-0.635249	0.0643652	-9.86945	5.64724e-23	4.94876e-21
YJR025C	2387.34	0.596836	0.0605879	9.85075	6.80375e-23	5.8848e-21
YLR038C	4113.61	0.664107	0.0675532	9.83088	8.28946e-23	7.07792e-21
YOR360C	612.431	-0.847447	0.0863128	-9.81832	9.38931e-23	7.91555e-21
YBL001C	3795.78	0.623289	0.0635106	9.81394	9.8067e-23	8.16408e-21
YBR269C	1579.06	0.662808	0.0675541	9.81151	1.00454e-22	8.25953e-21
YLR355C	1591.42	-0.817681	0.0833598	-9.80905	1.02929e-22	8.35981e-21
YCR021C	3515.48	0.871394	0.0894491	9.74179	2.00003e-22	1.60484e-20
YPR159W	1085.18	-0.756907	0.077754	-9.73464	2.14568e-22	1.70122e-20
YDR258C	3272.62	0.627184	0.0647531	9.68577	3.4658e-22	2.71556e-20
YMR307W	5628.14	-0.606636	0.0626569	-9.68187	3.60065e-22	2.78841e-20
YDR032C	2542.28	0.596187	0.0619547	9.62295	6.39716e-22	4.89714e-20
YDR043C	903.217	-0.759635	0.0789741	-9.61879	6.66069e-22	5.04093e-20
YLR432W	1912.18	-0.642235	0.0668562	-9.60621	7.52695e-22	5.63253e-20
YJL171C	3010.38	-0.60206	0.0627866	-9.589	8.89447e-22	6.58191e-20
YML028W	20779.3	0.476216	0.0497059	9.58069	9.63963e-22	7.05494e-20
YJL190C	15650.8	-0.502041	0.0524281	-9.57581	1.01065e-21	7.31623e-20
YPL092W	493.309	-1.08771	0.11427	-9.51878	1.75224e-21	1.25483e-19
YPL050C	639.299	-0.795501	0.0837151	-9.50249	2.0494e-21	1.45202e-19
YBR177C	3299.01	0.547807	0.0577687	9.48277	2.47628e-21	1.736e-19
YBR208C	1081.76	0.780549	0.0828954	9.41607	4.683e-21	3.24883e-19
YGR189C	3201.39	-0.577529	0.0613509	-9.41354	4.79721e-21	3.29375e-19
YPL093W	667.571	-0.809895	0.0864451	-9.36889	7.3301e-21	4.98148e-19
YER073W	818.992	-0.769254	0.0821934	-9.35908	8.04369e-21	5.41121e-19
YBR035C	3443.38	0.53719	0.0574426	9.35177	8.61919e-21	5.74038e-19
YJR073C	3737.02	0.684221	0.0731794	9.34992	8.77142e-21	5.78393e-19
YLR448W	5644.64	-0.577173	0.0618002	-9.33935	9.6931e-21	6.32902e-19
YKR092C	534.071	-0.92509	0.09949	-9.29833	1.42674e-20	9.22534e-19
YBR126W-A	4351.72	0.56911	0.0613165	9.28151	1.67093e-20	1.07004e-18
YLR466W	413.946	-0.881378	0.0950499	-9.2728	1.81331e-20	1.15015e-18
YGR160W	411.019	-1.00596	0.108878	-9.23932	2.4806e-20	1.55857e-18
YPR065W	1580.27	-0.790924	0.0856894	-9.23013	2.70302e-20	1.68244e-18
YMR140W	1399.31	0.606354	0.065719	9.22646	2.79719e-20	1.72493e-18
YOL019W	802.229	-0.692272	0.0750507	-9.22405	2.86091e-20	1.74804e-18
YGR008C	16635.4	0.579975	0.0631692	9.1813	4.25902e-20	2.57865e-18
YIR037W	2486.24	0.644551	0.0702935	9.16942	4.75549e-20	2.8385e-18
YNL173C	3499.74	0.520647	0.0567832	9.16902	4.77345e-20	2.8385e-18
YGR236C	502.595	0.955625	0.104365	9.15654	5.35867e-20	3.1583e-18
YDR149C	405.864	0.888644	0.0974038	9.1233	7.28713e-20	4.25722e-18
YJL001W	2683.21	0.530878	0.0583001	9.10595	8.55142e-20	4.90969e-18
YLR142W	1606.74	0.666869	0.0732285	9.10669	8.49342e-20	4.90969e-18
YLR372W	1177.99	-0.729994	0.0802222	-9.09966	9.06174e-20	5.15822e-18
YHR071W	4528.13	-0.562619	0.0619013	-9.08897	9.99847e-20	5.6432e-18
YCR034W	608.836	-0.853174	0.0940718	-9.06939	1.19687e-19	6.69845e-18
YJL166W	4427.41	0.511776	0.0564727	9.06235	1.27665e-19	7.08538e-18
YLR186W	607.803	-0.780471	0.0861911	-9.05512	1.36415e-19	7.50848e-18
YAL061W	1735.31	0.690955	0.0763617	9.04845	1.45018e-19	7.91655e-18
YJL217W	3530.62	0.572408	0.0633601	9.0342	1.65202e-19	8.94508e-18
YOR215C	4031.04	0.513306	0.0568794	9.02447	1.80569e-19	9.69828e-18
YKR081C	1141.44	-0.677319	0.0751263	-9.01574	1.95548e-19	1.04188e-17
YBR068C	3085.51	-0.528015	0.0586062	-9.00954	2.06916e-19	1.0937e-17
YLR121C	633.878	-0.804289	0.08968	-8.96843	3.00763e-19	1.57723e-17
YHR052W	972.885	-0.715858	0.0798287	-8.96743	3.03518e-19	1.57924e-17
YOR137C	279.536	-1.02256	0.114166	-8.95678	3.34312e-19	1.72598e-17
YFR053C	32441.1	0.606779	0.067766	8.95403	3.42722e-19	1.75579e-17
YAL025C	358.705	-0.951646	0.106505	-8.93521	4.06397e-19	2.06611e-17
YGL158W	502.703	-0.858232	0.0962377	-8.91783	4.75494e-19	2.39908e-17
YDL208W	2261.63	-0.621543	0.0697223	-8.91455	4.89794e-19	2.45265e-17
YDR033W	6237.66	-0.727441	0.0818636	-8.88601	6.33451e-19	3.12503e-17
YGR043C	940.009	0.691198	0.0777789	8.88671	6.29467e-19	3.12503e-17
YHL034C	6401.97	0.458903	0.0518127	8.85697	8.222e-19	4.02636e-17
YBR053C	1373.25	0.675554	0.0763248	8.85104	8.67057e-19	4.21504e-17
YCL033C	1184.48	0.679548	0.0768586	8.84153	9.44158e-19	4.55659e-17
YGR254W	36587.5	0.550758	0.0623312	8.83598	9.92207e-19	4.75403e-17
YHL021C	12608.6	0.483953	0.0548366	8.82536	1.09104e-18	5.19023e-17
YOR340C	890.159	-0.695901	0.0788703	-8.82335	1.11086e-18	5.24703e-17
YBR026C	2149.09	0.555721	0.0631153	8.80485	1.31025e-18	6.14525e-17
YER190W	470.168	-0.797473	0.0906123	-8.80094	1.35679e-18	6.31905e-17
YBR109C	4382.78	0.497253	0.0565256	8.79696	1.40572e-18	6.4566e-17
YNL209W	9673.34	-0.548468	0.0623427	-8.79763	1.39732e-18	6.4566e-17
YGR253C	3985.03	0.499978	0.0570237	8.76789	1.8204e-18	8.304e-17
YGR229C	1234.79	-0.671205	0.0767204	-8.74872	2.15788e-18	9.77654e-17
YLL024C	4696.82	0.572012	0.0654263	8.74285	2.27302e-18	1.02286e-16
YPL081W	2093.15	-0.588014	0.0675664	-8.70276	3.23919e-18	1.44785e-16
YGR296W	523.394	-0.756872	0.0871784	-8.68188	3.89284e-18	1.72842e-16
YNL305C	1909.8	0.544768	0.0628949	8.66156	4.65337e-18	2.03891e-16
YPL283C	521.736	-0.755812	0.0872552	-8.66209	4.63183e-18	2.03891e-16
YNL190W	2080.59	-0.586065	0.0678758	-8.63438	5.90489e-18	2.57036e-16
YPR156C	927.541	-0.677174	0.0784836	-8.62823	6.23101e-18	2.69471e-16
YNL142W	1349.33	0.806393	0.0935266	8.62207	6.57531e-18	2.82526e-16
YCL035C	4438.89	0.556747	0.0647308	8.60096	7.90511e-18	3.37487e-16
YOR020C	4740.63	0.546167	0.0635281	8.59725	8.16454e-18	3.46343e-16
YGR228W	424.927	-0.830659	0.0966358	-8.59577	8.27078e-18	3.48629e-16
YKL109W	3649.65	-0.583573	0.0680849	-8.57125	1.02369e-17	4.2879e-16
YBR046C	1318.03	0.584101	0.0681536	8.57037	1.03155e-17	4.29382e-16
YER124C	2784.1	0.722231	0.0843353	8.5638	1.09209e-17	4.51758e-16
YNR051C	459.203	-0.793721	0.0928593	-8.54757	1.25705e-17	5.16789e-16
YBL032W	913.563	-0.702276	0.0824408	-8.51856	1.61556e-17	6.60101e-16
YEL026W	616.284	-0.790054	0.09281	-8.5126	1.70081e-17	6.90695e-16
YLR413W	276.019	-1.01085	0.118772	-8.51085	1.72657e-17	6.96906e-16
YJL108C	425.678	-0.800501	0.0942364	-8.4946	1.98616e-17	7.96857e-16
YPL079W	12256.7	-0.450512	0.053217	-8.46557	2.54907e-17	1.01658e-15
YOL085W-A	3605.17	0.559137	0.0660553	8.46467	2.56875e-17	1.01833e-15
YHL034W-A	2921.63	0.497979	0.0589166	8.45227	2.85685e-17	1.12583e-15
YLR345W	2453.31	0.515032	0.060948	8.45035	2.9042e-17	1.13776e-15
YPL211W	735.659	-0.686842	0.0814588	-8.43176	3.40491e-17	1.32612e-15
YMR217W	3900.12	-0.549269	0.0652582	-8.41686	3.86705e-17	1.49736e-15
YGR192C	155839	0.451225	0.0538443	8.38018	5.28479e-17	2.03449e-15
YBR126W-B	5098.79	0.537724	0.0642358	8.37108	5.70904e-17	2.18519e-15
YDL174C	4277.79	0.475861	0.0569154	8.36084	6.22746e-17	2.36999e-15
YNL192W	5628.81	-0.555193	0.0664338	-8.35708	6.42871e-17	2.43268e-15
YOR355W	865.643	-0.711	0.0850872	-8.35613	6.481e-17	2.43861e-15
YBR286W	11302.9	0.425646	0.0509442	8.35514	6.5355e-17	2.4453e-15
YKL156C-A	1474.65	-0.669527	0.080357	-8.3319	7.9552e-17	2.95891e-15
YKL026C	1116.73	0.634492	0.0761577	8.33128	7.99704e-17	2.95891e-15
YKL142W	8155.53	0.541989	0.0650657	8.32988	8.09235e-17	2.97763e-15
YGR019W	3676.46	0.485983	0.0584176	8.31912	8.86187e-17	3.24286e-15
YDR297W	1073.64	-0.602399	0.0724261	-8.31743	8.98881e-17	3.27134e-15
YOR310C	1885.86	-0.6325	0.0763719	-8.28184	1.21288e-16	4.39008e-15
YML004C	4436.5	0.447132	0.0540094	8.27879	1.24434e-16	4.47964e-15
YML106W	2299.55	-0.52529	0.0634962	-8.27278	1.30873e-16	4.67959e-15
YNL180C	1534.09	-0.538296	0.0650721	-8.2723	1.31394e-16	4.67959e-15
YDL133C-A	22054.5	0.611709	0.0739767	8.26894	1.35154e-16	4.78791e-15
YNL339C	522.057	-0.717569	0.086803	-8.26663	1.37798e-16	4.85574e-15
YPR010C-A	3589.88	0.524542	0.0638182	8.21931	2.04675e-16	7.17441e-15
YLR149C	2630.36	0.513395	0.0626754	8.19132	2.58367e-16	9.00904e-15
YGL047W	912.971	0.665264	0.0813695	8.17584	2.93804e-16	1.01913e-14
YJL048C	4076.43	0.505256	0.0618511	8.16892	3.11164e-16	1.07376e-14
YKR039W	8193.9	0.555971	0.0681814	8.15429	3.51239e-16	1.2058e-14
YEL036C	476.841	-0.766856	0.0941252	-8.14719	3.72467e-16	1.27212e-14
YIL110W	339.975	-0.858686	0.10543	-8.1446	3.8053e-16	1.29302e-14
YJL183W	247.528	-0.983253	0.121255	-8.10894	5.10618e-16	1.72625e-14
YKR043C	1190.04	-0.58725	0.0725894	-8.09002	5.96544e-16	2.00656e-14
YOR259C	3314.47	0.485241	0.0602786	8.04997	8.28132e-16	2.77154e-14
YIR012W	457.391	-0.789941	0.098141	-8.04905	8.34406e-16	2.77857e-14
YBR056W	3092.43	0.444789	0.0553601	8.03447	9.39808e-16	3.11399e-14
YBR285W	1191.52	0.563172	0.070103	8.0335	9.47299e-16	3.12327e-14
YML056C	1228.97	-0.613917	0.0767566	-7.99823	1.26222e-15	4.14107e-14
YEL039C	10467.8	0.622958	0.0779941	7.98725	1.37984e-15	4.50477e-14
YPR204W	386.771	-0.780458	0.097775	-7.98218	1.4377e-15	4.67078e-14
YOR230W	3834.41	0.507765	0.0637126	7.96962	1.59159e-15	5.14562e-14
YAL060W	3634.21	0.544084	0.0682824	7.96814	1.61086e-15	5.18276e-14
YMR110C	3623.86	0.544001	0.0682964	7.96529	1.64839e-15	5.25285e-14
YNL248C	606.776	-0.770024	0.0966725	-7.96529	1.64842e-15	5.25285e-14
YIL111W	4498.4	0.530192	0.0667068	7.94809	1.89402e-15	6.00674e-14
YGL048C	4106.54	0.423979	0.0533724	7.94379	1.961e-15	6.18969e-14
YPR160W	7830.38	0.473798	0.0596828	7.9386	2.04478e-15	6.4237e-14
YMR290C	900.067	-0.664252	0.0836873	-7.93731	2.06618e-15	6.46045e-14
YAL040C	231.028	-0.929056	0.117509	-7.90628	2.65196e-15	8.25331e-14
YHR001W-A	2206.45	0.553011	0.0700623	7.89313	2.94697e-15	9.08774e-14
YLR052W	685.31	-0.648935	0.0822153	-7.89311	2.94737e-15	9.08774e-14
YBR069C	455.537	-0.744365	0.0944734	-7.87909	3.2977e-15	1.01211e-13
YER026C	3918.47	0.450689	0.0573098	7.86408	3.71814e-15	1.13591e-13
YDR050C	46009.8	0.433495	0.0552626	7.84428	4.35448e-15	1.32424e-13
YNL096C	4300.79	-0.539818	0.0690086	-7.82247	5.17958e-15	1.568e-13
YKL156W	3046.18	-0.477819	0.061132	-7.81618	5.44522e-15	1.64096e-13
YIL087C	995.669	0.604357	0.0776087	7.78722	6.84973e-15	2.05492e-13
YER110C	892.788	-0.642575	0.0825528	-7.78381	7.03726e-15	2.10171e-13
YPL152W	744.609	0.612493	0.0787522	7.77746	7.39927e-15	2.19996e-13
YPL123C	1432.67	0.549859	0.0708685	7.75886	8.56962e-15	2.53661e-13
YMR316C-A	483.354	-0.744418	0.095966	-7.7571	8.68935e-15	2.56067e-13
YDR530C	1238.51	0.524665	0.0677077	7.74896	9.26478e-15	2.71821e-13
YJL148W	656.43	-0.763106	0.098713	-7.73055	1.07084e-14	3.12799e-13
YNL300W	295.418	-0.818706	0.105952	-7.72713	1.09996e-14	3.199e-13
YIL033C	3906.38	0.453142	0.0586761	7.72276	1.1384e-14	3.29641e-13
YKL081W	5324.49	-0.501932	0.0651168	-7.70818	1.27628e-14	3.66379e-13
YLR051C	720.405	-0.619184	0.0803256	-7.70843	1.27375e-14	3.66379e-13
YGR194C	1341.14	0.527387	0.0684724	7.70219	1.33757e-14	3.80693e-13
YKL154W	336.72	-0.780013	0.101267	-7.70252	1.33406e-14	3.80693e-13
YER016W	668.482	-0.664086	0.0862432	-7.70016	1.35897e-14	3.85139e-13
YLR264W	1828.95	-0.660546	0.0858803	-7.69147	1.45456e-14	4.10482e-13
YBR062C	1120.72	0.566709	0.0737526	7.68392	1.54294e-14	4.33585e-13
YMR311C	4019.43	0.417248	0.0543355	7.67911	1.60192e-14	4.48268e-13
YMR199W	247.047	-0.877481	0.114336	-7.67458	1.65966e-14	4.62482e-13
YNR015W	518.19	-0.685769	0.0894786	-7.66406	1.80151e-14	4.99919e-13
YMR010W	363.392	-0.771423	0.100683	-7.66189	1.83216e-14	5.06315e-13
YEL009C	6799.05	-0.499367	0.0651918	-7.65997	1.85979e-14	5.10453e-13
YER143W	1578.42	0.489582	0.0639159	7.65978	1.86246e-14	5.10453e-13
YBR137W	1141.8	0.552216	0.0721226	7.65662	1.90885e-14	5.16787e-13
YDL130W-A	2131.26	0.643174	0.0839988	7.65694	1.90416e-14	5.16787e-13
YPL219W	611.28	0.644596	0.0841795	7.65739	1.89747e-14	5.16787e-13
YDR423C	1229.33	0.523289	0.0683802	7.65263	1.9691e-14	5.30941e-13
YNL141W	1221.15	-0.578631	0.0756526	-7.64852	2.03309e-14	5.45984e-13
YER165W	4445.09	-0.451563	0.0590724	-7.64423	2.10204e-14	5.62232e-13
YGL205W	384.769	0.792746	0.104109	7.61461	2.64489e-14	7.046e-13
YHR170W	2144.21	-0.513327	0.0674412	-7.61148	2.70976e-14	7.19004e-13
YER079W	1506.01	0.518364	0.0681398	7.60737	2.79734e-14	7.39298e-13
YBR230W-A	273.389	0.867707	0.114096	7.60505	2.84791e-14	7.49688e-13
YDR129C	7787.12	0.406659	0.0534816	7.60371	2.87756e-14	7.5451e-13
YHR136C	269.73	0.831309	0.109367	7.60109	2.93655e-14	7.66958e-13
YMR251W-A	18479.1	0.626605	0.0825123	7.59408	3.09985e-14	8.06446e-13
YKL117W	8597.2	0.400329	0.0527431	7.59017	3.19477e-14	8.27905e-13
YMR093W	142.223	-1.06304	0.140099	-7.58777	3.25465e-14	8.40154e-13
YDL169C	1084.55	0.622303	0.0820538	7.58409	3.34838e-14	8.61012e-13
YMR271C	963.959	0.588138	0.0777695	7.56258	3.95159e-14	1.00834e-12
YOR298C-A	8340.14	0.465312	0.061526	7.56285	3.94326e-14	1.00834e-12
YNR064C	257.848	-1.55732	0.206146	-7.55449	4.20509e-14	1.06893e-12
YOL077C	2213.54	-0.494814	0.0655268	-7.55133	4.30839e-14	1.09102e-12
YPL203W	2176.21	0.482587	0.0641351	7.52454	5.29078e-14	1.33472e-12
YDL021W	705.521	0.625131	0.0831716	7.51616	5.64077e-14	1.41764e-12
YNL135C	10866.7	0.415132	0.0552529	7.51331	5.76526e-14	1.44348e-12
YGL215W	1809.42	-0.489892	0.0654627	-7.48353	7.23541e-14	1.80479e-12
YGL030W	28614	0.412952	0.0552337	7.47646	7.6354e-14	1.89745e-12
YER066C-A	8152.79	0.432514	0.0579212	7.46728	8.18673e-14	2.0269e-12
YKL152C	127683	0.495604	0.0664602	7.45716	8.84085e-14	2.18074e-12
YOR078W	471.765	-0.698945	0.0939165	-7.4422	9.90213e-14	2.43351e-12
YER174C	755.622	-0.576205	0.077534	-7.43164	1.07258e-13	2.62623e-12
YNL075W	881.523	-0.579479	0.078028	-7.42656	1.11458e-13	2.71907e-12
YLR342W	2283.61	-0.505269	0.0680759	-7.42215	1.15236e-13	2.801e-12
YGR108W	347.533	-0.808014	0.108892	-7.42033	1.16831e-13	2.81917e-12
YGR148C	14278.7	-0.393598	0.0530426	-7.42041	1.16758e-13	2.81917e-12
YPL238C	1793.55	-0.523916	0.0706107	-7.41978	1.17313e-13	2.8206e-12
YLR249W	18372.8	-0.502055	0.0677809	-7.40703	1.29164e-13	3.09436e-12
YPL237W	3630.2	-0.448489	0.0606477	-7.39499	1.41418e-13	3.37578e-12
YNL055C	7653.91	0.434675	0.0589351	7.37549	1.63747e-13	3.89485e-12
YMR280C	1440.57	0.513671	0.0696527	7.37474	1.64662e-13	3.90267e-12
YMR241W	1654.3	-0.516122	0.0700586	-7.367	1.74508e-13	4.12136e-12
YER130C	596.295	-0.619694	0.0841302	-7.36589	1.75968e-13	4.12658e-12
YPR028W	6998.41	0.450417	0.0611472	7.36611	1.75673e-13	4.12658e-12
YOR019W	2292.81	0.459432	0.062505	7.35032	1.97739e-13	4.62085e-12
YPL004C	10609.3	0.470954	0.0641171	7.34522	2.05424e-13	4.78365e-12
YDR372C	1521.99	-0.485992	0.066191	-7.34227	2.10007e-13	4.87333e-12
YPL089C	1517.96	-0.484576	0.0660971	-7.33127	2.27983e-13	5.2721e-12
YCR088W	2093.7	0.460271	0.0628087	7.32815	2.33358e-13	5.34076e-12
YDR379C-A	371.677	0.76166	0.103935	7.32824	2.33202e-13	5.34076e-12
YOR285W	4697.72	0.54325	0.0741242	7.32891	2.32029e-13	5.34076e-12
YBL029C-A	1424.22	0.518881	0.0708214	7.32662	2.36031e-13	5.38345e-12
YGR191W	646.947	-0.623178	0.0850678	-7.32565	2.37737e-13	5.39962e-12
YNL208W	6302.9	0.436292	0.0595596	7.3253	2.38361e-13	5.39962e-12
YOR028C	1406.12	-0.589527	0.0806153	-7.31284	2.61562e-13	5.90509e-12
YBR172C	622.311	-0.693829	0.094916	-7.30992	2.67292e-13	6.01407e-12
YHR162W	19256.1	0.473987	0.0648678	7.30698	2.73223e-13	6.12681e-12
YDL213C	1034.37	-0.533384	0.0731283	-7.2938	3.01328e-13	6.73438e-12
YJL066C	891.808	0.536168	0.0735435	7.29048	3.08842e-13	6.87922e-12
YDL229W	13204.4	-0.452239	0.0620609	-7.28703	3.16866e-13	7.03442e-12
YDR060W	1078.72	-0.590484	0.0812456	-7.26789	3.65155e-13	8.07951e-12
YNL009W	495.025	0.661652	0.0910606	7.26606	3.70138e-13	8.16264e-12
YGL008C	16950.8	-0.510373	0.0702736	-7.26266	3.79551e-13	8.34262e-12
YOL045W	570.937	-0.603587	0.083227	-7.2523	4.09766e-13	8.97712e-12
YBL020W	641.332	-0.585578	0.0807508	-7.25167	4.11652e-13	8.98887e-12
YHR007C	1855.67	-0.650055	0.0898265	-7.23678	4.59448e-13	9.99976e-12
YDR374W-A	576.969	0.626706	0.0868436	7.21649	5.33464e-13	1.15729e-11
YNL151C	644.758	-0.590888	0.0819224	-7.21278	5.48191e-13	1.18537e-11
YJL157C	279.125	-0.827086	0.114719	-7.20966	5.60924e-13	1.20898e-11
YDR358W	1315.96	0.480664	0.0667087	7.20542	5.78664e-13	1.2432e-11
YIL123W	1762.56	-0.483553	0.0671455	-7.20157	5.95238e-13	1.27469e-11
YER145C	557.568	-0.713476	0.0992827	-7.18631	6.65662e-13	1.42093e-11
YJL129C	587.509	-0.615458	0.0856558	-7.18524	6.70887e-13	1.42751e-11
YOR043W	1075.82	-0.50942	0.0709075	-7.18429	6.75565e-13	1.43289e-11
YPR169W	1271.47	-0.498267	0.0693816	-7.18154	6.89292e-13	1.45736e-11
YOR317W	6963.34	0.402877	0.056113	7.17974	6.98425e-13	1.472e-11
YKL091C	1943.02	0.516638	0.071981	7.17742	7.10387e-13	1.49249e-11
YDR370C	298.631	-0.773634	0.108017	-7.16215	7.94219e-13	1.66336e-11
YLR196W	667.353	-0.622896	0.0871628	-7.14635	8.91152e-13	1.86052e-11
YOR346W	422.897	-0.678955	0.0950555	-7.14272	9.15019e-13	1.90438e-11
YDR399W	629.859	-0.614695	0.0861207	-7.1376	9.49751e-13	1.97051e-11
YMR309C	955.3	-0.589583	0.0826448	-7.13394	9.75351e-13	2.01734e-11
YBR214W	3857.27	0.430167	0.060311	7.13248	9.85741e-13	2.03252e-11
YIL062C	4224.82	0.472839	0.0663639	7.12494	1.04125e-12	2.13697e-11
YNL239W	2610.75	0.473016	0.0663906	7.12473	1.04282e-12	2.13697e-11
YER081W	1047.84	-0.519379	0.0729237	-7.12223	1.06195e-12	2.16952e-11
YLL008W	965.586	-0.602329	0.0846037	-7.11942	1.08382e-12	2.20741e-11
YNL007C	2388.03	0.455286	0.0639937	7.11454	1.12289e-12	2.28001e-11
YKR018C	2089.69	0.428515	0.0602539	7.11182	1.14525e-12	2.31835e-11
YDR516C	9624.75	0.448828	0.063263	7.09463	1.29695e-12	2.61747e-11
YER156C	1628.76	-0.467085	0.0658693	-7.09109	1.33059e-12	2.6692e-11
YKL212W	1232.68	-0.485023	0.0683989	-7.09109	1.33058e-12	2.6692e-11
YJL068C	1164.61	0.514182	0.0727932	7.0636	1.62247e-12	3.24494e-11
YDR492W	247.798	-0.801468	0.113571	-7.05695	1.70194e-12	3.39369e-11
YDR222W	1575.49	-0.568941	0.0807337	-7.04714	1.82635e-12	3.63089e-11
YOR042W	2671.84	0.413504	0.0587431	7.03919	1.93364e-12	3.83274e-11
YBR111C	3147.95	0.479686	0.0681513	7.03854	1.94258e-12	3.83905e-11
YLR056W	2018.11	-0.512997	0.072942	-7.03295	2.02207e-12	3.98432e-11
YDR031W	689.241	0.562264	0.0800142	7.02705	2.10946e-12	4.14424e-11
YDL078C	2831.17	0.432181	0.0615269	7.02427	2.15191e-12	4.2152e-11
YNR036C	2352.27	0.505866	0.0720221	7.02376	2.15979e-12	4.21825e-11
YDL086W	2602.5	0.42299	0.060384	7.005	2.46981e-12	4.80964e-11
YBL039C-A	82.8548	-1.18553	0.169382	-6.99916	2.57508e-12	4.99112e-11
YDL126C	8164.31	0.398324	0.0569116	6.999	2.57799e-12	4.99112e-11
YMR292W	363.204	-0.691719	0.0988706	-6.9962	2.62989e-12	5.07684e-11
YKL004W	528.403	-0.605529	0.0865635	-6.99519	2.64895e-12	5.09884e-11
YLR333C	6075.53	-0.40272	0.057586	-6.99336	2.68377e-12	5.15097e-11
YLR264C-A	2565.79	-1.3069	0.186901	-6.99248	2.70074e-12	5.16866e-11
YCR077C	1102.34	-0.487244	0.0696945	-6.99113	2.72678e-12	5.20353e-11
YMR303C	5445.54	0.455706	0.0652714	6.98171	2.91611e-12	5.54895e-11
YLL066C	431.039	-0.639365	0.0916891	-6.97318	3.09851e-12	5.87922e-11
YLR008C	501.986	-0.624795	0.0896789	-6.96702	3.23728e-12	6.12508e-11
YDR077W	32965.1	-0.418314	0.06016	-6.95336	3.56685e-12	6.72953e-11
YLR130C	885.969	-0.531925	0.076529	-6.95064	3.63643e-12	6.84142e-11
YPL078C	5097.05	0.404408	0.0581887	6.94994	3.6544e-12	6.85587e-11
YIL156W-B	1099.42	0.516092	0.0743306	6.9432	3.83311e-12	7.17093e-11
YGR052W	543.941	-0.629661	0.0907084	-6.9416	3.87675e-12	7.23226e-11
YEL077C	381.288	-0.693677	0.0999505	-6.9402	3.91546e-12	7.28406e-11
YLR407W	303.173	-0.737419	0.106467	-6.92628	4.32061e-12	8.01539e-11
YER167W	767.505	-0.562289	0.0812112	-6.92378	4.39735e-12	8.1351e-11
YOL061W	889.513	-0.516098	0.0746791	-6.91088	4.8164e-12	8.88566e-11
YML130C	633.835	-0.587521	0.0851026	-6.90368	5.06712e-12	9.32238e-11
YPL250C	1817.68	0.475096	0.0688474	6.9007	5.17462e-12	9.49393e-11
YOL083W	838.072	0.533589	0.0773536	6.89806	5.27181e-12	9.64567e-11
YHR137W	264.106	0.771399	0.111845	6.89701	5.31075e-12	9.6903e-11
YHR016C	1458.45	0.443932	0.0643885	6.89458	5.40257e-12	9.83091e-11
YJR048W	6060.06	0.598663	0.0868818	6.89055	5.55788e-12	1.0086e-10
YOR208W	1003.32	-0.49867	0.072402	-6.88752	5.67726e-12	1.02746e-10
YPR187W	2090.25	-0.445018	0.064698	-6.87839	6.05337e-12	1.09256e-10
YOR120W	2784.23	0.415522	0.0604397	6.87499	6.19961e-12	1.11593e-10
YLR454W	1243.83	0.510792	0.07433	6.87195	6.33281e-12	1.13683e-10
YJL107C	911.807	-0.55762	0.0812699	-6.86133	6.82204e-12	1.22137e-10
YMR058W	739.571	-0.631492	0.092067	-6.85905	6.93196e-12	1.23772e-10
YDR529C	10828.3	0.415793	0.0606322	6.85763	7.00128e-12	1.24675e-10
YGR055W	618.419	-0.605941	0.088411	-6.85368	7.1972e-12	1.27822e-10
YIR036C	858.227	0.535554	0.0781884	6.84954	7.40893e-12	1.31233e-10
YLR080W	705.811	0.533776	0.0780196	6.84156	7.83356e-12	1.38386e-10
YLR175W	3268.04	-0.452677	0.0661857	-6.8395	7.94721e-12	1.40022e-10
YKL067W	5797.55	0.473703	0.0692647	6.83902	7.97368e-12	1.40118e-10
YAL036C	453.141	-0.707704	0.103561	-6.83371	8.27463e-12	1.45024e-10
YLR421C	2864.12	0.399587	0.0584796	6.83293	8.31975e-12	1.45432e-10
YLR414C	4971.71	-0.424427	0.0621744	-6.82639	8.7079e-12	1.51818e-10
YER103W	903.324	0.523861	0.0767886	6.82212	8.9709e-12	1.55995e-10
YBR034C	298.233	-0.817909	0.120053	-6.81292	9.56381e-12	1.65872e-10
YGR161W-C	1546.42	0.465644	0.0683839	6.80926	9.81024e-12	1.69704e-10
YEL053W-A	9860.66	-0.383192	0.0562922	-6.80721	9.95114e-12	1.71696e-10
YLR068W	195.443	-0.885446	0.130117	-6.805	1.0105e-11	1.739e-10
YDL039C	920.874	-0.514677	0.0756376	-6.80451	1.01391e-11	1.74037e-10
YKL153W	93217.3	0.472974	0.0695209	6.80334	1.02223e-11	1.75014e-10
YOR386W	1286.64	0.494896	0.072799	6.79811	1.05997e-11	1.81011e-10
YML133C	478.445	-0.603924	0.0888489	-6.7972	1.06673e-11	1.81699e-10
YOR007C	5150.62	0.362018	0.0532657	6.79646	1.07223e-11	1.82169e-10
YOL048C	1969.61	0.442215	0.0652417	6.7781	1.21769e-11	2.06357e-10
YJR109C	3495.57	-0.433925	0.0640632	-6.77338	1.25804e-11	2.12653e-10
YMR238W	1917.89	-0.423538	0.0626	-6.76578	1.32594e-11	2.23522e-10
YOL010W	458.374	-0.60952	0.0900932	-6.76544	1.32905e-11	2.23522e-10
YFL026W	967.5	-0.549915	0.0813226	-6.76215	1.35962e-11	2.28087e-10
YKR061W	563.212	-0.620761	0.0918771	-6.75643	1.41436e-11	2.36674e-10
YDL086C-A	1813.04	0.424943	0.0629304	6.75259	1.45233e-11	2.41812e-10
YDR022C	385.478	0.666244	0.0986641	6.75265	1.45174e-11	2.41812e-10
YPL100W	1140.94	0.469787	0.0696384	6.74609	1.51882e-11	2.52252e-10
YMR016C	1046.15	-0.538606	0.0799254	-6.73886	1.59635e-11	2.64469e-10
YIL158W	337.471	-0.680049	0.10098	-6.7345	1.64496e-11	2.71847e-10
YBR256C	5472.77	0.41147	0.061191	6.72436	1.76367e-11	2.90744e-10
YHR219W	246.219	-0.756334	0.112699	-6.7111	1.93158e-11	3.17637e-10
YHR132W-A	2507.09	0.451279	0.0673202	6.70347	2.03523e-11	3.33859e-10
YBR052C	3272.73	0.47515	0.0709202	6.69978	2.0873e-11	3.41558e-10
YOL149W	760.424	-0.537569	0.0802528	-6.69844	2.10649e-11	3.43854e-10
YGR063C	669.884	-0.535771	0.0801072	-6.68817	2.25984e-11	3.67983e-10
YPL012W	328.536	-0.70878	0.10604	-6.68406	2.32419e-11	3.77539e-10
YGL021W	370.531	-0.655847	0.0981895	-6.6794	2.39918e-11	3.88772e-10
YML110C	2934.07	0.377947	0.0566228	6.67481	2.47548e-11	4.00163e-10
YIL118W	754.657	-0.513861	0.0770597	-6.66835	2.58688e-11	4.17158e-10
YFR052C-A	3105.51	0.503309	0.0754939	6.66689	2.61285e-11	4.20327e-10
YNL168C	1620.98	0.441624	0.0663361	6.65738	2.7876e-11	4.4736e-10
YKL145W	3210.41	0.377682	0.0568658	6.64164	3.10211e-11	4.96636e-10
YGR014W	314.573	-0.711157	0.107106	-6.63973	3.14257e-11	5.01907e-10
YDR513W	5342.99	0.411791	0.0620438	6.63711	3.19901e-11	5.09698e-10
YOR303W	3505.87	-0.403733	0.0608764	-6.63201	3.31148e-11	5.2636e-10
YDL007W	4577.83	0.360349	0.0543388	6.63153	3.32227e-11	5.26818e-10
YGR115C	819.855	0.54395	0.0820814	6.62696	3.42673e-11	5.42091e-10
YAL023C	995.689	-0.500266	0.0755326	-6.62318	3.51563e-11	5.54836e-10
YLR404W	230.434	-0.804664	0.1216	-6.61729	3.65844e-11	5.76009e-10
YMR226C	5947.48	0.398957	0.0603209	6.61391	3.74309e-11	5.87948e-10
YGL041W-A	913.867	0.485939	0.0734782	6.61337	3.75655e-11	5.88674e-10
YLL067C	415.544	-0.615168	0.0931221	-6.60603	3.94759e-11	6.17159e-10
YBL113C	260.777	-0.729893	0.110535	-6.60331	4.02087e-11	6.27142e-10
YBR089C-A	3280.04	0.434717	0.0658497	6.60165	4.066e-11	6.327e-10
YGR034W	18816	-0.353499	0.0535707	-6.59873	4.14699e-11	6.43799e-10
YFR049W	1825.69	0.455054	0.0691643	6.57931	4.72624e-11	7.32017e-10
YBR265W	365.913	-0.644376	0.0979705	-6.57725	4.79238e-11	7.40539e-10
YMR014W	304.737	-0.70995	0.108004	-6.57335	4.91945e-11	7.56664e-10
YOR374W	8354.04	0.436694	0.0664331	6.57345	4.91634e-11	7.56664e-10
YPR183W	1918.1	0.437763	0.0666107	6.57197	4.96554e-11	7.61992e-10
YLR003C	953.348	-0.520417	0.0793639	-6.55736	5.477e-11	8.38547e-10
YOL136C	742.828	-0.527786	0.0805589	-6.55156	5.69391e-11	8.69758e-10
YGL078C	848.634	-0.54817	0.0836786	-6.55089	5.71946e-11	8.71662e-10
YPL260W	2479.59	0.414829	0.0633358	6.54969	5.7658e-11	8.76717e-10
YDR413C	1246.17	-0.482554	0.0737675	-6.54156	6.08813e-11	9.23621e-10
YER080W	1879.81	0.435432	0.0665986	6.53816	6.2282e-11	9.42722e-10
YHL002C-A	616.741	0.579509	0.0886806	6.5348	6.36964e-11	9.61945e-10
YJL067W	525.423	0.555393	0.0851252	6.52443	6.82593e-11	1.02852e-09
YDR115W	853.324	0.543519	0.0833547	6.52055	7.00486e-11	1.0531e-09
YDR327W	1880.14	0.406544	0.0623734	6.51791	7.12937e-11	1.0694e-09
YMR107W	3692.98	0.996348	0.152955	6.51401	7.31707e-11	1.09509e-09
YNL113W	300.443	-0.698976	0.107312	-6.51351	7.34141e-11	1.09627e-09
YOR277C	3191.29	-0.507661	0.0779467	-6.51292	7.37022e-11	1.09811e-09
YNL202W	394.366	0.652372	0.100195	6.511	7.46515e-11	1.10977e-09
YHR143W-A	547.319	-0.667414	0.102522	-6.50995	7.51761e-11	1.11508e-09
YIL047C	459.907	-0.592406	0.0911443	-6.49966	8.05031e-11	1.19145e-09
YPL234C	2435.53	0.39971	0.0615022	6.49911	8.07948e-11	1.19311e-09
YLR048W	19728.3	-0.344509	0.0530116	-6.49875	8.09915e-11	1.19337e-09
YOR302W	287.213	-0.750556	0.115679	-6.48826	8.68328e-11	1.27661e-09
YNL077W	995.934	0.478246	0.0738053	6.47983	9.18231e-11	1.34701e-09
YML113W	128.296	-0.926991	0.143306	-6.46863	9.8897e-11	1.44759e-09
YER067W	33332.1	0.403184	0.0624004	6.46124	1.03846e-10	1.51669e-09
YDR070C	1631.26	0.545461	0.0844268	6.46076	1.04177e-10	1.5182e-09
YER175C	1454.56	0.445696	0.0690509	6.45461	1.08498e-10	1.57772e-09
YLR259C	4009.59	0.421311	0.0653088	6.45106	1.11072e-10	1.61163e-09
YDL067C	4117.19	0.401286	0.0622668	6.44463	1.15883e-10	1.67779e-09
YJR142W	1351.05	0.437797	0.067967	6.44132	1.18436e-10	1.71102e-09
YDR255C	982.039	0.479734	0.0744873	6.44048	1.19096e-10	1.71683e-09
YCR009C	5103.81	0.389898	0.0606313	6.43064	1.27071e-10	1.82784e-09
YNR061C	445.806	-0.593303	0.0922871	-6.42888	1.28546e-10	1.84507e-09
YKL100C	2951.06	0.388588	0.060503	6.42261	1.33955e-10	1.91858e-09
YPR118W	976.588	-0.508448	0.0791897	-6.42064	1.35706e-10	1.93949e-09
YLL040C	1556.74	0.436515	0.0680226	6.4172	1.38806e-10	1.97954e-09
YOR276W	3581.01	-0.497807	0.0776202	-6.41337	1.42335e-10	2.02554e-09
YKL103C	1854.94	0.393115	0.0614471	6.39763	1.57809e-10	2.24096e-09
YDL201W	767.629	-0.510871	0.0798984	-6.39401	1.61593e-10	2.28981e-09
YDL097C	3486.06	0.373623	0.058479	6.38902	1.6695e-10	2.3607e-09
YEL029C	319.417	-0.682238	0.107097	-6.37027	1.88691e-10	2.66246e-09
YOR173W	2174.82	0.515968	0.0812	6.35428	2.09407e-10	2.94852e-09
YER021W	4108.32	0.341678	0.0538082	6.34992	2.15427e-10	3.02688e-09
YBL002W	5646.41	0.370306	0.0583242	6.34911	2.16571e-10	3.03655e-09
YDR101C	495.994	-0.596832	0.0940562	-6.34548	2.21731e-10	3.10237e-09
YCL018W	158656	-0.398857	0.0628706	-6.3441	2.23728e-10	3.12375e-09
YOR020W-A	650.982	0.532102	0.0838852	6.34322	2.25014e-10	3.13514e-09
YDL122W	600.016	-0.566922	0.0894542	-6.33757	2.33424e-10	3.23875e-09
YLR350W	4905	0.403264	0.0636302	6.33763	2.3333e-10	3.23875e-09
YER122C	1919.79	-0.381566	0.0602117	-6.33708	2.34164e-10	3.24227e-09
YDL091C	1012.76	0.468719	0.0739699	6.33662	2.34857e-10	3.24512e-09
YMR009W	1771.61	0.441959	0.069773	6.33423	2.38526e-10	3.28899e-09
YNR035C	3515.29	0.371176	0.0586117	6.3328	2.40751e-10	3.31281e-09
YEL001C	2097.03	-0.437344	0.0691093	-6.3283	2.4788e-10	3.40388e-09
YDR244W	1234.96	0.420069	0.0664559	6.32103	2.59832e-10	3.56066e-09
YML087C	300.925	-0.807931	0.128065	-6.30876	2.81285e-10	3.84673e-09
YFR044C	2490.9	0.437429	0.0693489	6.30766	2.83279e-10	3.86606e-09
YNR027W	305.466	-0.663786	0.105244	-6.30711	2.84289e-10	3.87191e-09
YDR196C	1787.22	0.450261	0.0714092	6.30536	2.87525e-10	3.90799e-09
YDR019C	227.117	0.739618	0.117391	6.30046	2.96771e-10	4.02544e-09
YBR181C	23539.6	-0.329912	0.0523839	-6.29797	3.01574e-10	4.08228e-09
YBL024W	863.113	-0.497593	0.0790155	-6.29741	3.02665e-10	4.08874e-09
YDR146C	400.965	-0.652681	0.103697	-6.2941	3.0918e-10	4.15988e-09
YPR160C-A	1178.57	0.494713	0.0785981	6.29421	3.08969e-10	4.15988e-09
YDL205C	439.27	-0.654214	0.104014	-6.28966	3.18159e-10	4.27205e-09
YKL191W	571.451	-0.596269	0.0949139	-6.28221	3.33801e-10	4.47307e-09
YNL274C	2034.5	0.476364	0.0759429	6.27266	3.54934e-10	4.74671e-09
YBR066C	481.549	-0.604303	0.0966297	-6.2538	4.00573e-10	5.34632e-09
YER089C	926.153	-0.470503	0.0752713	-6.25077	4.08441e-10	5.44043e-09
YLR271W	963.337	0.452799	0.0725235	6.24349	4.27921e-10	5.68854e-09
YOR185C	1129.86	0.600406	0.0961892	6.24193	4.32211e-10	5.73411e-09
YGL172W	551.095	-0.540926	0.0867614	-6.23464	4.52806e-10	5.9954e-09
YDL184C	5557.44	0.481994	0.0773601	6.23052	4.64892e-10	6.14322e-09
YDR412W	1300.21	-0.468159	0.0752175	-6.22407	4.84417e-10	6.38855e-09
YER067C-A	25981	0.401909	0.0646446	6.21721	5.06059e-10	6.66077e-09
YJL098W	439.06	-0.588295	0.0947542	-6.20864	5.34464e-10	7.02076e-09
YPL111W	4825.22	0.429548	0.0691909	6.20817	5.36066e-10	7.02795e-09
YNL213C	488.797	-0.6593	0.106332	-6.20038	5.63264e-10	7.37001e-09
YKL181W	2760.16	-0.378865	0.0611591	-6.19474	5.83799e-10	7.62372e-09
YFL044C	637.234	0.545673	0.0880981	6.19393	5.86828e-10	7.64828e-09
YBR090C	1907.97	0.437814	0.0706946	6.19303	5.90183e-10	7.67698e-09
YER162C	861.273	0.455456	0.0735516	6.19233	5.92814e-10	7.69618e-09
YGL167C	993.818	-0.437301	0.0706323	-6.19123	5.96965e-10	7.735e-09
YOR292C	545.023	-0.551598	0.0892059	-6.18343	6.27255e-10	8.11169e-09
YGR264C	1252.75	-0.501014	0.0810435	-6.18203	6.32811e-10	8.15188e-09
YJL151C	4104.97	0.381355	0.0616856	6.18224	6.31986e-10	8.15188e-09
YOR079C	189.267	-0.910367	0.147353	-6.17816	6.4855e-10	8.3385e-09
YFL002C	619.71	-0.505096	0.0819061	-6.16678	6.96963e-10	8.94369e-09
YMR314W	3248.9	0.347795	0.0564967	6.15602	7.45939e-10	9.55376e-09
YDR545C-A	98.8808	-0.969466	0.157531	-6.15414	7.54872e-10	9.64961e-09
YLR466C-A	100.13	-0.964392	0.15677	-6.15163	7.66928e-10	9.78494e-09
YGR111W	1214.11	0.420952	0.0684432	6.15038	7.72953e-10	9.84296e-09
YLL011W	343.456	-0.645493	0.104965	-6.1496	7.76768e-10	9.87266e-09
YJL185C	476.344	0.561627	0.0913578	6.14755	7.8688e-10	9.98213e-09
YHR001W	1234.17	0.415227	0.0675812	6.14412	8.04103e-10	1.01812e-08
YGL153W	1004.45	0.469358	0.0764635	6.13833	8.33941e-10	1.0539e-08
YML093W	620.749	-0.618059	0.100752	-6.13447	8.54429e-10	1.07775e-08
YLR467C-A	100.015	-0.961884	0.156837	-6.13302	8.62266e-10	1.08353e-08
YOR396C-A	100.015	-0.961884	0.156837	-6.13302	8.62266e-10	1.08353e-08
YCL040W	21486.9	0.43142	0.0704165	6.12669	8.97274e-10	1.12539e-08
YJR086W	1128.14	0.423465	0.0691416	6.1246	9.0914e-10	1.13813e-08
YJL020C	2513.55	0.380303	0.0621458	6.11954	9.38459e-10	1.17263e-08
YGR128C	579.391	-0.560149	0.0915524	-6.11834	9.45527e-10	1.17925e-08
YGL162W	235.44	-0.711679	0.116337	-6.11738	9.51234e-10	1.18415e-08
YDL226C	1000.06	-0.445793	0.0728826	-6.11659	9.55966e-10	1.18782e-08
YOR176W	2352.92	0.359692	0.0588912	6.10774	1.01051e-09	1.25325e-08
YGL250W	624.975	0.512298	0.0839328	6.10368	1.03656e-09	1.28317e-08
YGR207C	1562.36	0.393578	0.064492	6.10273	1.04269e-09	1.28838e-08
YPL212C	392.4	-0.601227	0.0987476	-6.08852	1.13959e-09	1.40549e-08
YOL133W	663.385	0.499429	0.0820417	6.0875	1.14688e-09	1.41188e-08
YDR204W	978.124	0.449865	0.0740109	6.07836	1.21416e-09	1.49194e-08
YNR065C	363.443	-0.605015	0.0995593	-6.07693	1.22503e-09	1.50253e-08
YML063W	35450.3	-0.339496	0.0559319	-6.06982	1.28056e-09	1.56774e-08
YLR395C	3604.17	0.456672	0.0753542	6.06034	1.35834e-09	1.65992e-08
YER023C-A	888.487	0.443107	0.0731545	6.05714	1.38565e-09	1.69019e-08
YMR193W	1083.55	0.469946	0.0776241	6.05413	1.41178e-09	1.71891e-08
YJL167W	7369.49	0.308842	0.0510161	6.05382	1.41453e-09	1.71912e-08
YBL087C	10575.2	-0.35134	0.0582224	-6.03445	1.59508e-09	1.93502e-08
YAL007C	1165.69	-0.40557	0.06728	-6.02808	1.65914e-09	2.00543e-08
YHL001W	6533.46	-0.332277	0.0551208	-6.02816	1.65839e-09	2.00543e-08
YNR046W	581.384	-0.501581	0.0832186	-6.02727	1.6675e-09	2.01187e-08
YPL218W	5416.88	0.357929	0.0594356	6.02213	1.7214e-09	2.07315e-08
YDR156W	401.715	-0.674416	0.112079	-6.01735	1.77298e-09	2.13141e-08
YDR029W	368.425	0.617636	0.10272	6.01284	1.82302e-09	2.18763e-08
YJR064W	994.008	-0.518966	0.0863708	-6.00858	1.87158e-09	2.24186e-08
YJL225C	587.802	-0.513617	0.0855082	-6.00664	1.89402e-09	2.26467e-08
YIR038C	973.525	0.544394	0.0906612	6.00471	1.91673e-09	2.28771e-08
YMR296C	852.48	-0.448166	0.0746744	-6.0016	1.95378e-09	2.32776e-08
YMR027W	2538.54	0.353808	0.058964	6.00041	1.96825e-09	2.34081e-08
YIL177C	580.387	-0.515671	0.0859574	-5.99915	1.98348e-09	2.35472e-08
YGR140W	345.173	-0.588382	0.098187	-5.99247	2.06684e-09	2.44931e-08
YNL114C	238.121	-0.697203	0.116399	-5.98978	2.10125e-09	2.48568e-08
YNL283C	466.523	-0.53163	0.0887788	-5.98825	2.1211e-09	2.50471e-08
YKL009W	1647.88	-0.524022	0.0875469	-5.98562	2.15571e-09	2.54107e-08
YHR198C	836.54	0.446284	0.0746174	5.98097	2.21817e-09	2.61007e-08
YMR081C	4828.49	0.42799	0.0716568	5.97278	2.33244e-09	2.73969e-08
YER134C	1937.8	0.383761	0.0642676	5.9713	2.35376e-09	2.75987e-08
YJR139C	5978.69	0.32804	0.0549656	5.96809	2.40053e-09	2.80976e-08
YJL152W	1974.6	0.401521	0.0673258	5.96385	2.46365e-09	2.87859e-08
YLL053C	283.777	-0.666873	0.111905	-5.95927	2.53372e-09	2.95527e-08
YLL039C	8697.33	0.382122	0.0641297	5.95858	2.54441e-09	2.96255e-08
YDR287W	1095.47	0.413363	0.0693985	5.95636	2.5791e-09	2.9977e-08
YCR004C	3879.11	0.407264	0.0683893	5.95509	2.59931e-09	3.01593e-08
YBR047W	470.799	0.594554	0.0998531	5.95428	2.61213e-09	3.02028e-08
YNL215W	1341.03	0.408355	0.0685792	5.9545	2.60875e-09	3.02028e-08
YJR152W	523.882	0.512231	0.0860372	5.9536	2.62307e-09	3.02767e-08
YGR054W	690.032	-0.519013	0.0872533	-5.94834	2.70871e-09	3.12111e-08
YEL021W	3558.97	-0.388761	0.0653695	-5.94714	2.72868e-09	3.135e-08
YJR096W	2108.45	0.381629	0.0641712	5.94705	2.73018e-09	3.135e-08
YNL220W	2021.49	0.402895	0.0677582	5.94607	2.7465e-09	3.14831e-08
YPR160W-A	197.982	0.741658	0.124822	5.94174	2.82011e-09	3.22714e-08
YDR225W	15789.1	0.352313	0.0592985	5.94135	2.82691e-09	3.22936e-08
YGR064W	374.416	-0.570203	0.0959955	-5.93989	2.85208e-09	3.25255e-08
YOR309C	485.665	-0.63708	0.107382	-5.93282	2.9778e-09	3.39012e-08
YGL041C	582.112	0.498777	0.0840916	5.93135	3.00448e-09	3.41464e-08
YJL192C	1884.71	-0.409536	0.0691085	-5.92598	3.10433e-09	3.52212e-08
YER049W	890.762	-0.506149	0.0854778	-5.92141	3.19187e-09	3.61528e-08
YNL079C	9189.43	0.311509	0.0526112	5.92097	3.20046e-09	3.61886e-08
YOR273C	891.265	-0.457119	0.077225	-5.91931	3.23287e-09	3.64931e-08
YMR122W-A	5313.41	-0.356055	0.0601962	-5.91491	3.32058e-09	3.74197e-08
YFL039C	18745.2	0.335175	0.0567056	5.91078	3.40482e-09	3.83042e-08
YOL114C	202.834	0.706004	0.119505	5.90775	3.46821e-09	3.89516e-08
YCL042W	2269.48	0.500379	0.0847628	5.90328	3.56344e-09	3.992e-08
YDR328C	3542.85	0.352021	0.0596328	5.90314	3.56643e-09	3.992e-08
YER004W	1366.95	0.390202	0.0661254	5.90094	3.61431e-09	4.03881e-08
YLR099C	315.618	-0.60163	0.101969	-5.90011	3.63261e-09	4.05246e-08
YML115C	937.56	-0.423211	0.071748	-5.89858	3.66651e-09	4.08344e-08
YMR305C	3464.97	-0.360585	0.0612019	-5.89173	3.82185e-09	4.24933e-08
YEL024W	3601.53	0.419621	0.071246	5.88974	3.86794e-09	4.29341e-08
YDR024W	72.5166	-1.03835	0.176433	-5.88522	3.97521e-09	4.39783e-08
YPL231W	3848.07	0.341957	0.0581021	5.88544	3.96993e-09	4.39783e-08
YNR010W	376.112	0.558757	0.0949492	5.8848	3.98539e-09	4.40177e-08
YHL011C	1739.17	-0.38915	0.066177	-5.88045	4.09162e-09	4.51163e-08
YER025W	1849.2	-0.399584	0.0679717	-5.87868	4.13545e-09	4.55241e-08
YBR234C	2754.47	0.343993	0.0585242	5.87779	4.15789e-09	4.56957e-08
YIL007C	847.406	0.464624	0.0790558	5.87716	4.17354e-09	4.5792e-08
YDR321W	770.898	-0.515806	0.0878348	-5.87245	4.29393e-09	4.70354e-08
YGR240C	6377.6	-0.341134	0.0581273	-5.86874	4.3911e-09	4.80208e-08
YDL113C	1642.53	0.36387	0.0620783	5.86147	4.58799e-09	5.00918e-08
YOR021C	1671.05	-0.396303	0.0676244	-5.86035	4.61884e-09	5.03461e-08
YGR209C	4350.09	0.432677	0.0739199	5.85333	4.81824e-09	5.24338e-08
YLR133W	1201.92	0.408667	0.0698332	5.85204	4.85579e-09	5.26703e-08
YNR038W	235.402	-0.681739	0.116494	-5.85211	4.85372e-09	5.26703e-08
YGL002W	1192.12	0.442507	0.0756564	5.8489	4.94834e-09	5.35704e-08
YMR114C	1310.17	0.423041	0.072331	5.84868	4.95486e-09	5.35704e-08
YPR098C	1259.54	0.441233	0.0754897	5.84495	5.06729e-09	5.46971e-08
YMR136W	1363.03	-0.45621	0.0781137	-5.84033	5.20961e-09	5.61424e-08
YER142C	576.782	0.492761	0.0844321	5.83618	5.34122e-09	5.74677e-08
YBL086C	1849.55	0.420371	0.0720644	5.83327	5.435e-09	5.83824e-08
YPL221W	962.89	-0.423642	0.0727554	-5.82282	5.78622e-09	6.20552e-08
YKL007W	3045.05	0.344168	0.0591462	5.81894	5.92222e-09	6.34116e-08
YIL053W	4222.63	-0.460391	0.079174	-5.81493	6.06591e-09	6.48459e-08
YMR205C	4460.19	-0.369171	0.0636097	-5.8037	6.48681e-09	6.92342e-08
YOR226C	158.933	-0.766532	0.132118	-5.80188	6.55761e-09	6.98643e-08
YPL273W	2826.4	-0.380226	0.0655376	-5.80164	6.56682e-09	6.98643e-08
YGL005C	1454.55	0.381582	0.0657971	5.79938	6.65611e-09	7.07012e-08
YMR194C-B	713.592	0.511024	0.0881832	5.79502	6.83116e-09	7.24451e-08
YPR041W	1628.33	-0.398722	0.0688567	-5.7906	7.01351e-09	7.42607e-08
YKL190W	927.64	-0.420611	0.0726974	-5.78577	7.21793e-09	7.63038e-08
YDR447C	10532.8	-0.337435	0.0583254	-5.78539	7.23428e-09	7.63555e-08
YDR100W	974.801	0.43675	0.0755039	5.78448	7.27382e-09	7.66513e-08
YBR011C	10779.5	0.319941	0.0553218	5.78328	7.32567e-09	7.70758e-08
YLR025W	2420.68	0.348344	0.0602472	5.78191	7.38566e-09	7.75843e-08
YGR097W	1339.19	-0.387939	0.0671617	-5.77619	7.64117e-09	8.0142e-08
YDR471W	9651.95	-0.322206	0.0559325	-5.76062	8.38034e-09	8.77564e-08
YDL145C	1739.79	-0.388179	0.0674508	-5.755	8.66428e-09	9.05873e-08
YCL063W	429.323	-0.543481	0.0945971	-5.74522	9.17998e-09	9.58286e-08
YJL133W	661.444	-0.457944	0.0797723	-5.74064	9.43197e-09	9.8305e-08
YKR049C	1273.99	0.444428	0.0774499	5.73827	9.56507e-09	9.95365e-08
YER012W	2257.54	0.338806	0.0590798	5.73472	9.76739e-09	1.01483e-07
YAL030W	1249.36	0.401589	0.0700511	5.73281	9.87813e-09	1.02474e-07
YOL134C	412.834	0.539761	0.0941762	5.73139	9.9608e-09	1.03171e-07
YER030W	1847.71	0.377809	0.0659437	5.72927	1.00864e-08	1.0431e-07
YNL203C	195.26	0.730097	0.12748	5.72714	1.02138e-08	1.05463e-07
YOR342C	546.816	-0.491687	0.0859845	-5.71832	1.07581e-08	1.10912e-07
YDL135C	2677.54	0.333144	0.0582631	5.71792	1.07833e-08	1.11e-07
YDL063C	279.438	-0.639743	0.111959	-5.7141	1.10289e-08	1.13353e-07
YDR150W	1550.75	0.371223	0.0649834	5.71258	1.11274e-08	1.14189e-07
YIL040W	278.709	-0.6353	0.111354	-5.70524	1.1618e-08	1.1904e-07
YNL194C	4042.59	0.394552	0.0692003	5.7016	1.18691e-08	1.21426e-07
YGL227W	1541.43	0.395918	0.0694599	5.69995	1.19839e-08	1.22413e-07
YIL112W	2386.88	0.350928	0.0615767	5.69904	1.20485e-08	1.22884e-07
YCR043C	596.32	-0.479738	0.0841868	-5.69849	1.20874e-08	1.23092e-07
YDR351W	555.268	-0.500196	0.0877951	-5.69732	1.21709e-08	1.23753e-07
YLR356W	588.444	0.538575	0.0945431	5.69661	1.22216e-08	1.24079e-07
YCR084C	1335.66	-0.377056	0.0662152	-5.69441	1.23798e-08	1.25494e-07
YGR248W	1450.11	0.464628	0.0816446	5.69086	1.26399e-08	1.27936e-07
YKL023W	1168	0.392901	0.0690514	5.68997	1.27061e-08	1.28411e-07
YDL228C	6502.36	-0.336992	0.059242	-5.68839	1.28241e-08	1.29406e-07
YEL054C	15738	-0.32142	0.0565404	-5.68479	1.30972e-08	1.31963e-07
YDR079C-A	327.401	0.608182	0.10703	5.68233	1.32873e-08	1.33676e-07
YDR272W	2621.94	0.328556	0.0579003	5.6745	1.39093e-08	1.39722e-07
YIL157C	1505.02	0.368602	0.0649903	5.67165	1.41425e-08	1.41851e-07
YDR063W	1551.97	0.369041	0.0650972	5.66907	1.43572e-08	1.43788e-07
YAL049C	1212.07	0.390442	0.0689602	5.66184	1.49757e-08	1.49757e-07
YLR073C	94.9655	-0.923269	0.163308	-5.65355	1.57163e-08	1.56794e-07
YPR170W-B	2685.8	0.384828	0.0680696	5.65344	1.57265e-08	1.56794e-07
YLR270W	2505.09	0.351153	0.0621342	5.65152	1.59034e-08	1.58321e-07
YCR030C	1187.42	0.394394	0.069902	5.6421	1.67991e-08	1.66988e-07
YDR496C	981.969	-0.514431	0.0912195	-5.63948	1.70561e-08	1.6929e-07
YKL002W	2959.59	0.376765	0.0668118	5.63921	1.70835e-08	1.6931e-07
YOL108C	1416.88	0.452106	0.0801914	5.63783	1.72207e-08	1.70415e-07
YNR067C	1671.82	0.411542	0.073193	5.6227	1.87999e-08	1.85767e-07
YGL198W	1242.92	0.391644	0.0697093	5.61825	1.929e-08	1.90328e-07
YLR452C	261.645	-0.619787	0.110334	-5.61736	1.93897e-08	1.91028e-07
YDL074C	723.305	-0.451135	0.0803586	-5.61403	1.97666e-08	1.94454e-07
YIL122W	322.621	-0.608528	0.108491	-5.60904	2.03455e-08	1.99854e-07
YPL283W-B	96.0771	-0.885469	0.158003	-5.60412	2.09311e-08	2.05304e-07
YBL069W	957.731	-0.422987	0.0754916	-5.6031	2.10549e-08	2.06214e-07
YOR132W	1800.62	0.348176	0.062189	5.59866	2.16009e-08	2.11251e-07
YPL090C	26241.8	-0.292201	0.0522902	-5.58806	2.29619e-08	2.24232e-07
YGR169C-A	513.671	-0.483751	0.086683	-5.5807	2.39559e-08	2.33596e-07
YER044C	3678.33	0.412186	0.0738734	5.57962	2.41042e-08	2.34699e-07
YPR148C	3805.3	0.308595	0.0553233	5.57803	2.43263e-08	2.36516e-07
YGL152C	683.781	0.460058	0.0825033	5.57623	2.45785e-08	2.3862e-07
YDL161W	1958.05	0.349896	0.0627511	5.57593	2.46208e-08	2.38682e-07
YER190C-B	96.2701	-0.879036	0.157693	-5.57437	2.48432e-08	2.39791e-07
YGR296C-B	96.2701	-0.879036	0.157693	-5.57437	2.48432e-08	2.39791e-07
YPR204C-A	96.2701	-0.879036	0.157693	-5.57437	2.48432e-08	2.39791e-07
YER048C	2833.15	0.321712	0.0577185	5.5738	2.49238e-08	2.40221e-07
YNR019W	2462.27	0.333798	0.0599065	5.57198	2.51855e-08	2.42393e-07
YNL127W	837.503	0.419066	0.0752614	5.56814	2.57467e-08	2.47436e-07
YPL245W	196.907	-0.676297	0.121572	-5.56295	2.65259e-08	2.54557e-07
YBR238C	160.043	-0.750028	0.13505	-5.55371	2.79665e-08	2.67996e-07
YJR037W	132.821	0.781716	0.140765	5.55334	2.80262e-08	2.68181e-07
YPR170W-A	2116.27	0.387635	0.0698412	5.55024	2.85284e-08	2.72596e-07
YKL093W	811.708	0.440687	0.0795708	5.53831	3.05409e-08	2.91407e-07
YLR019W	546.842	-0.519841	0.0939004	-5.5361	3.09287e-08	2.94552e-07
YLR083C	831.02	-0.509437	0.0920237	-5.53593	3.09589e-08	2.94552e-07
YML092C	2021.89	0.358153	0.0647207	5.53382	3.13324e-08	2.9768e-07
YKR009C	943.003	0.45033	0.0814476	5.52908	3.21917e-08	3.05409e-07
YOL053W	1474.45	0.365399	0.066149	5.52388	3.31586e-08	3.14134e-07
YDL082W	11145.9	-0.303483	0.0549548	-5.52241	3.34381e-08	3.16332e-07
YLR001C	758.893	0.443687	0.0803487	5.52202	3.3512e-08	3.16581e-07
YEL033W	7858.83	-0.31714	0.0574769	-5.51769	3.43476e-08	3.24015e-07
YDR072C	761.669	-0.427557	0.0775106	-5.51611	3.46587e-08	3.26488e-07
YBL091C	2935.66	0.323212	0.0585979	5.51576	3.47278e-08	3.26677e-07
YPL119C	308.968	0.571797	0.103677	5.51517	3.48453e-08	3.2732e-07
YGR132C	2053.97	0.357484	0.0648332	5.5139	3.50966e-08	3.29216e-07
YDL095W	1144.95	-0.375264	0.0681074	-5.50988	3.59077e-08	3.3635e-07
YER057C	2772.86	0.316677	0.0575027	5.50718	3.64637e-08	3.41079e-07
YGR183C	2916.24	0.354797	0.0644458	5.50536	3.68412e-08	3.44127e-07
YGR060W	2297.02	-0.39088	0.0710453	-5.50184	3.75851e-08	3.50583e-07
YDR041W	1812.12	0.339	0.0616637	5.49756	3.8509e-08	3.58699e-07
YOL029C	243.893	-0.619541	0.112732	-5.4957	3.89164e-08	3.61988e-07
YPR190C	217.341	-0.684503	0.124576	-5.49468	3.91427e-08	3.63585e-07
YKL171W	1054.01	0.39567	0.0721267	5.48577	4.11683e-08	3.81868e-07
YBR120C	866.831	0.411963	0.0751201	5.48406	4.15683e-08	3.85042e-07
YML081C-A	2410.17	0.352932	0.0644078	5.47965	4.26171e-08	3.94208e-07
YOL129W	3621.61	0.369094	0.0673633	5.47915	4.27365e-08	3.94764e-07
YDR524C	427.781	-0.571084	0.104265	-5.47726	4.31965e-08	3.98216e-07
YIL097W	1302.58	0.389709	0.0711521	5.47712	4.32297e-08	3.98216e-07
YOL096C	579.868	0.461841	0.084389	5.47276	4.43082e-08	4.07586e-07
YEL040W	318.819	-0.553495	0.101187	-5.46999	4.50049e-08	4.13424e-07
YNR053C	676.312	-0.470273	0.0859952	-5.4686	4.53607e-08	4.16119e-07
YBR143C	4289.4	-0.342967	0.0627272	-5.46759	4.5619e-08	4.17339e-07
YFL038C	5690.92	0.283373	0.0518262	5.46776	4.55751e-08	4.17339e-07
YGR244C	4963.39	0.320775	0.0586994	5.46471	4.63657e-08	4.23588e-07
YEL006W	1033.94	0.382284	0.0699825	5.46256	4.69321e-08	4.28175e-07
YMR255W	2309.11	0.350105	0.0641229	5.4599	4.76397e-08	4.34037e-07
YOR127W	628.706	-0.474067	0.0868997	-5.45534	4.88804e-08	4.44732e-07
YPR110C	2205.5	-0.333315	0.0611189	-5.45355	4.9373e-08	4.48601e-07
YLR267W	1582.79	0.393464	0.0721762	5.45144	4.99636e-08	4.53348e-07
YKL110C	426.403	-0.511585	0.0939095	-5.44764	5.10427e-08	4.6251e-07
YCL054W	299.827	-0.639244	0.117382	-5.44582	5.15666e-08	4.66622e-07
YMR105C	7135.87	0.347386	0.0638547	5.44025	5.32059e-08	4.80802e-07
YER015W	592.412	0.454882	0.0836265	5.43945	5.34453e-08	4.81658e-07
YLR197W	2792.58	-0.377647	0.069427	-5.43948	5.34367e-08	4.81658e-07
YBR023C	698.511	-0.489785	0.0901218	-5.4347	5.48901e-08	4.94011e-07
YOR085W	690.737	-0.424524	0.0781757	-5.43039	5.62314e-08	5.054e-07
YJL005W	1136.54	0.37463	0.0690001	5.4294	5.6543e-08	5.07515e-07
YBR139W	2983.61	0.347026	0.063974	5.42449	5.81202e-08	5.2097e-07
YMR072W	4047.41	0.306306	0.0565201	5.41942	5.97923e-08	5.35238e-07
YHL050C	260.809	-0.621132	0.114695	-5.41553	6.11082e-08	5.46283e-07
YHL002W	1604.22	0.359106	0.0663835	5.40956	6.31788e-08	5.64036e-07
YEL058W	1489.1	-0.375901	0.0695526	-5.40455	6.49706e-08	5.78481e-07
YNL265C	1050.65	0.382556	0.0707814	5.40475	6.48986e-08	5.78481e-07
YGR175C	2069.98	-0.417937	0.0773475	-5.40337	6.54019e-08	5.81545e-07
YIL096C	344.301	-0.586412	0.108704	-5.39457	6.86863e-08	6.09934e-07
YMR029C	2012.13	0.34709	0.0643834	5.39099	7.00696e-08	6.21389e-07
YOR041C	613.549	0.474033	0.0879588	5.38926	7.0748e-08	6.26572e-07
YDR453C	1367.76	0.407761	0.0756814	5.38786	7.13023e-08	6.30471e-07
YGR210C	929.952	-0.408909	0.0758972	-5.38767	7.13777e-08	6.30471e-07
YOR289W	1479.1	0.359012	0.0667288	5.38017	7.44152e-08	6.56431e-07
YPR157W	96.7013	-0.858969	0.159692	-5.37891	7.4939e-08	6.60176e-07
YLR353W	142.459	-0.750333	0.139525	-5.37777	7.54155e-08	6.63497e-07
YGR028W	1562.81	0.341457	0.0635287	5.37485	7.66446e-08	6.73421e-07
YFR047C	955.904	0.391683	0.0729248	5.37105	7.82811e-08	6.86893e-07
YKL157W	2519.53	0.310775	0.0578734	5.36991	7.87758e-08	6.90325e-07
YFR004W	3098.29	0.308037	0.0574049	5.36604	8.04847e-08	7.04373e-07
YMR297W	5261.14	0.3639	0.0678327	5.36468	8.10943e-08	7.08777e-07
YKR065C	1110.25	0.364558	0.0679772	5.36294	8.18764e-08	7.14675e-07
YOL082W	1450.86	0.353359	0.0658929	5.36263	8.20169e-08	7.14964e-07
YBR244W	896.746	-0.538607	0.100488	-5.35993	8.32551e-08	7.24809e-07
YIL136W	7392.35	0.394795	0.0736749	5.3586	8.3869e-08	7.292e-07
YDR276C	5388.27	0.354207	0.0661242	5.35669	8.47584e-08	7.35972e-07
YDL079C	3572.19	0.36472	0.0682009	5.34773	8.90644e-08	7.72355e-07
YGR157W	1434.93	0.411496	0.0769858	5.34509	9.03737e-08	7.82691e-07
YER031C	1145.5	-0.38005	0.0711126	-5.34434	9.07453e-08	7.84888e-07
YDL124W	6142.47	0.321947	0.0602919	5.33982	9.30408e-08	8.03698e-07
YLR149C-A	55.4225	-1.02837	0.192691	-5.33686	9.45716e-08	8.15864e-07
YER077C	362.331	-0.544548	0.10207	-5.33502	9.55319e-08	8.23082e-07
YIL127C	1232.52	-0.434776	0.0815473	-5.33158	9.73607e-08	8.37755e-07
YIL084C	698.077	0.459375	0.0862157	5.3282	9.91888e-08	8.52383e-07
YML016C	868.421	-0.438323	0.0822697	-5.32788	9.93644e-08	8.52793e-07
YER148W	1283.55	-0.385867	0.0724421	-5.32656	1.00091e-07	8.57927e-07
YLR384C	719.412	-0.42533	0.0798752	-5.32493	1.0099e-07	8.64518e-07
YJR085C	2974.14	0.410046	0.0770322	5.32305	1.02044e-07	8.72417e-07
YOL113W	1631.75	-0.389895	0.0732728	-5.32114	1.03118e-07	8.80466e-07
YFR017C	1314.43	0.424024	0.0798416	5.31081	1.09138e-07	9.30675e-07
YOL117W	600.266	0.436383	0.0822165	5.30773	1.11001e-07	9.4535e-07
YGR266W	1234.49	0.397119	0.0748645	5.30451	1.12974e-07	9.60932e-07
YPL066W	1083.57	-0.382652	0.0721673	-5.3023	1.14354e-07	9.71423e-07
YFL021C-A	707.882	0.429663	0.0810476	5.30136	1.14941e-07	9.74969e-07
YLR435W	235.363	-0.621906	0.117315	-5.30117	1.15064e-07	9.74969e-07
YPL128C	140.445	-0.736711	0.139303	-5.28857	1.23277e-07	1.04323e-06
YJL177W	8610.96	-0.285495	0.0540047	-5.28648	1.24693e-07	1.05308e-06
YOL121C	6728.84	-0.301012	0.056941	-5.28639	1.24757e-07	1.05308e-06
YER055C	1832.5	-0.358724	0.0678642	-5.28592	1.25077e-07	1.05444e-06
YDR280W	854.491	-0.393525	0.0744631	-5.28483	1.25824e-07	1.0594e-06
YJL070C	773.224	0.427769	0.0809647	5.28341	1.26804e-07	1.06631e-06
YML070W	1758.65	0.358782	0.0681048	5.26809	1.37848e-07	1.15771e-06
YPR060C	442.97	-0.480652	0.0913003	-5.26452	1.40555e-07	1.17896e-06
YJR009C	43139.3	0.332101	0.0630921	5.26376	1.41142e-07	1.1824e-06
YNL110C	1279.79	-0.372824	0.0708343	-5.26332	1.41474e-07	1.18369e-06
YBR267W	471.521	-0.493633	0.0939067	-5.25663	1.46717e-07	1.22602e-06
YDR298C	6008.46	0.319332	0.0607599	5.25563	1.47516e-07	1.23115e-06
YKR074W	2967.82	0.33785	0.0642934	5.25481	1.48175e-07	1.2351e-06
YIL008W	691.613	-0.431861	0.0822743	-5.24904	1.52891e-07	1.27281e-06
YDR091C	856.318	-0.429026	0.0819874	-5.23284	1.6693e-07	1.38795e-06
YLR102C	675.587	0.415483	0.0794054	5.23243	1.67294e-07	1.38925e-06
YLL018C	7552.32	0.264875	0.0506653	5.22793	1.71415e-07	1.42169e-06
YPL166W	506.062	0.472023	0.0903296	5.22556	1.73625e-07	1.43823e-06
YER177W	15166.6	0.298545	0.057161	5.22287	1.76172e-07	1.45752e-06
YDR462W	554.091	0.471184	0.0902363	5.22167	1.77313e-07	1.46514e-06
YGR135W	4146.98	0.281255	0.0539248	5.21568	1.83142e-07	1.51143e-06
YHL033C	11995.6	-0.264839	0.0508487	-5.20838	1.90493e-07	1.57015e-06
YBR018C	39139	0.259386	0.049835	5.20488	1.94117e-07	1.59804e-06
YGL014W	475.515	-0.466189	0.0896984	-5.19729	2.02216e-07	1.66267e-06
YDR232W	746.584	-0.412708	0.0794322	-5.19573	2.03922e-07	1.67261e-06
YHR089C	3197.45	-0.376265	0.0724183	-5.19572	2.03928e-07	1.67261e-06
YCL057C-A	964.671	0.417595	0.0804467	5.19096	2.09214e-07	1.71385e-06
YFL022C	1386.21	-0.37146	0.0717074	-5.18021	2.21633e-07	1.81336e-06
YJR003C	440.851	-0.499718	0.0964963	-5.17863	2.23526e-07	1.8266e-06
YGL011C	4001.55	0.296809	0.0573352	5.17674	2.258e-07	1.84293e-06
YDR346C	2131.73	-0.313131	0.0605168	-5.17428	2.28787e-07	1.86331e-06
YGR103W	3804.51	-0.326114	0.0630267	-5.17423	2.28856e-07	1.86331e-06
YFR010W	2755.2	0.298109	0.0576473	5.17127	2.32513e-07	1.89076e-06
YLR390W-A	4909.82	-0.274207	0.0530721	-5.1667	2.38268e-07	1.9352e-06
YLR138W	1010.52	-0.378662	0.0733297	-5.16383	2.41952e-07	1.96273e-06
YDR304C	4311.68	0.275346	0.0533281	5.16324	2.42708e-07	1.96646e-06
YJR074W	858.43	0.437488	0.0847747	5.1606	2.46162e-07	1.99202e-06
YDR034C	4086.08	0.327012	0.0634679	5.1524	2.5718e-07	2.07867e-06
YOL020W	724.87	-0.415464	0.0806647	-5.15051	2.59779e-07	2.09712e-06
YER086W	1213.55	-0.40185	0.0780688	-5.14739	2.64141e-07	2.12976e-06
YDR249C	142.177	-0.714254	0.138891	-5.14257	2.71005e-07	2.18246e-06
YGR186W	2079.94	0.314995	0.0612553	5.14233	2.71356e-07	2.18264e-06
YML046W	265.527	-0.569292	0.110933	-5.13183	2.86932e-07	2.30515e-06
YJL123C	2769.66	0.317187	0.0618916	5.12487	2.97747e-07	2.38915e-06
YDR314C	668.435	0.438446	0.0855684	5.12392	2.99249e-07	2.39831e-06
YPL147W	549.246	0.453809	0.0885985	5.12208	3.02181e-07	2.4189e-06
YNL156C	3036.11	0.320717	0.0626218	5.12149	3.03138e-07	2.42365e-06
YPL067C	579.676	-0.466416	0.0910999	-5.11983	3.0581e-07	2.44208e-06
YJL111W	1210.41	-0.403775	0.0788822	-5.11871	3.0763e-07	2.45367e-06
YGR076C	843.601	0.388226	0.0758511	5.11826	3.08366e-07	2.4566e-06
YPL087W	1799.55	0.311774	0.0609385	5.11621	3.11733e-07	2.48046e-06
YNL112W	1136.82	-0.471985	0.0922918	-5.11405	3.15319e-07	2.506e-06
YLR284C	935.521	0.533237	0.104349	5.11011	3.21971e-07	2.55581e-06
YJL101C	989.312	-0.513452	0.100557	-5.10609	3.28901e-07	2.60772e-06
YMR158W-B	241.269	0.576379	0.112906	5.10492	3.30926e-07	2.62065e-06
YNL024C	110.748	-0.760863	0.149131	-5.10197	3.36144e-07	2.65881e-06
YGR214W	18186	-0.278281	0.0545474	-5.10164	3.36726e-07	2.66026e-06
YDR424C	1229.82	0.422235	0.0828062	5.09908	3.41303e-07	2.69322e-06
YBL050W	3650.24	0.306797	0.0601818	5.09784	3.43547e-07	2.70772e-06
YEL042W	958.622	-0.362193	0.0710955	-5.09445	3.49747e-07	2.75333e-06
YDL181W	1524.24	0.410826	0.0806483	5.09404	3.50511e-07	2.75609e-06
YHR113W	1344.72	0.347239	0.068183	5.09275	3.52913e-07	2.7717e-06
YDR130C	659.351	0.403608	0.0792992	5.08969	3.58656e-07	2.81348e-06
YFL068W	99.2438	-0.789456	0.155262	-5.08468	3.68252e-07	2.87859e-06
YLL066W-A	99.2438	-0.789456	0.155262	-5.08468	3.68252e-07	2.87859e-06
YLL067W-A	99.2438	-0.789456	0.155262	-5.08468	3.68252e-07	2.87859e-06
YMR159C	242.132	0.573708	0.112902	5.08148	3.74498e-07	2.92398e-06
YDR172W	1794.67	-0.331205	0.0652201	-5.07827	3.80881e-07	2.97033e-06
YMR307C-A	505.539	-0.466399	0.0918807	-5.07614	3.85188e-07	3.00041e-06
YGL036W	1079.77	-0.362647	0.0714517	-5.07541	3.86651e-07	3.00829e-06
YMR186W	11217	0.311998	0.0615682	5.06751	4.03046e-07	3.13219e-06
YDR377W	3049.73	0.338837	0.066907	5.0643	4.09897e-07	3.18172e-06
YML031W	397.75	-0.474312	0.0937479	-5.05944	4.20484e-07	3.2601e-06
YOR312C	22481.9	-0.303572	0.0600067	-5.05896	4.21545e-07	3.26452e-06
YIR029W	750.432	0.401599	0.0794123	5.05715	4.25577e-07	3.29192e-06
YMR099C	2772.26	0.310674	0.0614378	5.05672	4.2652e-07	3.29539e-06
YKL087C	399.152	-0.517405	0.102339	-5.05579	4.2862e-07	3.30777e-06
YDL143W	1572.76	-0.356585	0.0705675	-5.0531	4.34687e-07	3.35071e-06
YBR191W-A	2542.65	0.307935	0.0609765	5.05006	4.41677e-07	3.40066e-06
YKR030W	669.875	-0.424506	0.084078	-5.04896	4.44228e-07	3.41635e-06
YPR010C	891.189	-0.403727	0.0799762	-5.04808	4.46266e-07	3.42806e-06
YPR050C	212.37	-0.623237	0.123495	-5.04668	4.49555e-07	3.44935e-06
YLR190W	498.83	-0.572556	0.113458	-5.04641	4.50188e-07	3.45024e-06
YKL218C	1934.24	0.362495	0.0718749	5.04342	4.57293e-07	3.50066e-06
YLR291C	702.365	-0.428846	0.0850389	-5.04294	4.58422e-07	3.50527e-06
YPR172W	1485.12	0.331073	0.065696	5.03948	4.66799e-07	3.56523e-06
YOR243C	680.977	-0.419907	0.0833336	-5.03886	4.68308e-07	3.57266e-06
YPL162C	461.774	0.472734	0.0938428	5.03751	4.71616e-07	3.59378e-06
YJL117W	746.659	-0.399417	0.0793567	-5.03318	4.82414e-07	3.67186e-06
YMR318C	2776.21	-0.359012	0.0713531	-5.03148	4.86705e-07	3.70029e-06
YER056C	1897.68	-0.360656	0.0717355	-5.02758	4.96707e-07	3.77203e-06
YNL124W	241.523	-0.591904	0.11784	-5.02296	5.08811e-07	3.85954e-06
YIL154C	1527.22	0.318321	0.063385	5.02203	5.11286e-07	3.87391e-06
YAL011W	177.844	-0.627588	0.12518	-5.01347	5.34573e-07	4.04575e-06
YOR044W	241.06	-0.62279	0.124356	-5.0081	5.49695e-07	4.15547e-06
YOR141C	1111.85	0.346214	0.0691378	5.00759	5.51149e-07	4.1609e-06
YPL217C	646.819	-0.446363	0.0891404	-5.00741	5.51663e-07	4.1609e-06
YBR111W-A	790.085	0.378324	0.0755796	5.00564	5.56776e-07	4.19472e-06
YPR184W	2768.39	0.381745	0.0762835	5.00428	5.607e-07	4.2195e-06
YCL031C	1078.52	-0.351622	0.0702752	-5.0035	5.62977e-07	4.23134e-06
YGR089W	372.71	-0.478041	0.0955449	-5.00331	5.63543e-07	4.23134e-06
YKL006W	12594.5	-0.287327	0.057431	-5.003	5.64435e-07	4.23326e-06
YMR097C	1092.01	0.354811	0.0709424	5.0014	5.69162e-07	4.26391e-06
YBR149W	5315.75	0.370591	0.0741335	4.99898	5.76356e-07	4.31295e-06
YDR252W	220.529	0.58086	0.116261	4.99619	5.84734e-07	4.37074e-06
YDL029W	2901.8	0.295457	0.059193	4.99141	5.99402e-07	4.47536e-06
YNR013C	648.823	-0.407058	0.0816571	-4.98497	6.19709e-07	4.62179e-06
YJL034W	2792.71	0.315112	0.0632844	4.9793	6.38135e-07	4.75389e-06
YNL122C	522.397	0.421199	0.0847323	4.97093	6.66317e-07	4.9583e-06
YHR137C-A	100.65	0.814512	0.163901	4.96953	6.71147e-07	4.98866e-06
YJR075W	932.565	-0.365757	0.0736077	-4.969	6.72986e-07	4.99675e-06
YDR388W	3145.46	0.282726	0.0569352	4.96575	6.84347e-07	5.07545e-06
YML127W	466.649	-0.452402	0.0911089	-4.9655	6.85226e-07	5.07632e-06
YML118W	936.052	0.42075	0.0847737	4.96322	6.93348e-07	5.13078e-06
YMR250W	2970.95	0.344854	0.0694926	4.96246	6.96062e-07	5.14514e-06
YER147C-A	928.47	-0.391096	0.0789546	-4.95343	7.2916e-07	5.38382e-06
YML018C	99.6372	-0.765445	0.154601	-4.9511	7.37961e-07	5.44277e-06
YKL172W	1636.92	-0.399967	0.0808109	-4.94942	7.44349e-07	5.47988e-06
YKR096W	1238.76	0.347036	0.0701175	4.94934	7.44638e-07	5.47988e-06
YDR192C	220.876	-0.592402	0.119727	-4.94792	7.50091e-07	5.51392e-06
YDR119W-A	1766.55	0.476256	0.0963233	4.94435	7.63976e-07	5.60979e-06
YIL139C	396.277	-0.466102	0.0942805	-4.94377	7.66253e-07	5.62031e-06
YDR175C	994.14	0.347395	0.0702838	4.94275	7.70268e-07	5.64355e-06
YOL147C	746.676	0.419224	0.0848428	4.94119	7.76479e-07	5.6828e-06
YHR072W-A	4549.44	-0.372413	0.0753881	-4.93995	7.81442e-07	5.71285e-06
YHR174W	45627.8	0.286574	0.0580363	4.93785	7.899e-07	5.76835e-06
YDR062W	1078.3	-0.346672	0.0702135	-4.93739	7.91731e-07	5.77539e-06
YFR008W	439.836	0.449635	0.0911673	4.93197	8.14036e-07	5.93159e-06
YDR152W	1579.58	-0.347984	0.0705707	-4.93101	8.18068e-07	5.94796e-06
YNL312W	887.84	0.357196	0.0724375	4.93109	8.17721e-07	5.94796e-06
YMR177W	167.581	-0.645326	0.131039	-4.9247	8.44912e-07	6.13644e-06
YPL191C	351.236	0.500636	0.101671	4.92407	8.4761e-07	6.14932e-06
YGL038C	783.49	-0.370517	0.0752998	-4.92055	8.63018e-07	6.2475e-06
YNR052C	556.614	-0.507529	0.103142	-4.92066	8.6252e-07	6.2475e-06
YOR104W	551.855	-0.421205	0.085618	-4.91958	8.67284e-07	6.27157e-06
YML128C	7315.52	0.386708	0.078619	4.91876	8.70957e-07	6.29129e-06
YNL182C	374.37	-0.550446	0.112177	-4.90694	9.25103e-07	6.67518e-06
YGL053W	1043.89	0.351274	0.0716094	4.90542	9.32297e-07	6.7198e-06
YJR125C	2273.04	0.308198	0.062844	4.90418	9.38179e-07	6.75489e-06
YJR145C	20328	-0.247595	0.0505181	-4.90112	9.52908e-07	6.85353e-06
YHR042W	1073.16	-0.368036	0.075115	-4.89964	9.60142e-07	6.8981e-06
YHR032W	280.496	-0.551423	0.11255	-4.89937	9.61449e-07	6.90005e-06
YIL082W	437.154	-0.444195	0.0907589	-4.89423	9.86901e-07	7.0751e-06
YMR277W	475.049	-0.457971	0.093597	-4.89301	9.9306e-07	7.11159e-06
YLL058W	190.903	-0.615536	0.12595	-4.88715	1.02304e-06	7.3184e-06
YGR190C	153.387	-0.676096	0.138372	-4.88606	1.02874e-06	7.3513e-06
YLR446W	420.795	0.475546	0.0973859	4.88311	1.04428e-06	7.45433e-06
YOL105C	259.873	-0.542741	0.111287	-4.87694	1.07744e-06	7.68279e-06
YDR120C	651.771	-0.41448	0.0850308	-4.87447	1.09103e-06	7.77144e-06
YGL114W	568.937	-0.411947	0.0845532	-4.87204	1.10451e-06	7.85904e-06
YHR054C	679.824	-0.417866	0.0858355	-4.86821	1.12611e-06	8.00414e-06
YOR184W	2568.46	0.281373	0.0578042	4.86768	1.12917e-06	8.01732e-06
YHR144C	311.451	-0.546849	0.112458	-4.8627	1.15796e-06	8.21303e-06
YPR051W	262.647	-0.567733	0.116771	-4.86195	1.16232e-06	8.23519e-06
YDR293C	3281.56	-0.293658	0.0605461	-4.85016	1.23362e-06	8.73105e-06
YPL172C	171.583	-0.622207	0.128324	-4.84871	1.2427e-06	8.78594e-06
YEL077W-A	88.1322	-0.788721	0.162703	-4.84762	1.2495e-06	8.8247e-06
YIL128W	349.237	-0.489884	0.10107	-4.84698	1.25356e-06	8.84394e-06
YEL053C	285.536	-0.516543	0.10667	-4.84244	1.28255e-06	9.03893e-06
YGR123C	405.253	-0.494261	0.102303	-4.83136	1.35606e-06	9.54686e-06
YOR217W	675.685	-0.406694	0.0842404	-4.82778	1.38066e-06	9.70982e-06
YAL019W	215.371	-0.589206	0.122187	-4.82216	1.4201e-06	9.97665e-06
YLR050C	714.909	0.422819	0.0879288	4.80866	1.51947e-06	1.06635e-05
YKR099W	233.732	-0.600887	0.124986	-4.80764	1.52722e-06	1.07066e-05
YDR354W	1364.8	-0.335065	0.0697845	-4.80143	1.57535e-06	1.10324e-05
YHR051W	5315.46	0.303775	0.0632948	4.79936	1.5917e-06	1.11352e-05
YMR038C	1225.67	-0.374711	0.0780842	-4.79881	1.5961e-06	1.11543e-05
YMR191W	1416.51	0.373508	0.0778915	4.79523	1.62485e-06	1.13433e-05
YDR075W	313.292	-0.497717	0.10386	-4.79221	1.64956e-06	1.15037e-05
YNL061W	1328.9	-0.326816	0.0682319	-4.78978	1.66962e-06	1.16315e-05
YDR068W	1757.07	0.306366	0.0640035	4.7867	1.69545e-06	1.17867e-05
YDR450W	22923	-0.253571	0.0529725	-4.78684	1.69431e-06	1.17867e-05
YIL153W	465.32	-0.49806	0.104064	-4.78607	1.70079e-06	1.18115e-05
YHR161C	2472.01	0.307011	0.0641572	4.7853	1.70735e-06	1.18447e-05
YJL172W	1905.35	0.313284	0.065484	4.78413	1.71726e-06	1.19011e-05
YPR033C	1723.57	-0.35546	0.0743464	-4.78113	1.74309e-06	1.20676e-05
YDR404C	889.468	-0.380168	0.0795272	-4.78035	1.74991e-06	1.21022e-05
YKR028W	637.999	-0.393728	0.0823921	-4.7787	1.76429e-06	1.2189e-05
YOR101W	640.719	-0.418302	0.0875484	-4.77795	1.77091e-06	1.22221e-05
YER133W-A	1489.17	0.350026	0.0733156	4.77424	1.80386e-06	1.24366e-05
YBR145W	1697.6	0.317597	0.066573	4.77066	1.83623e-06	1.26374e-05
YHL029C	237.162	-0.552179	0.115746	-4.7706	1.83678e-06	1.26374e-05
YOL039W	23929.5	0.269341	0.0564751	4.76919	1.84964e-06	1.27127e-05
YGL123C-A	21119.4	-0.261034	0.0547515	-4.76761	1.86425e-06	1.27999e-05
YDR143C	550.166	-0.407451	0.0855764	-4.76126	1.92392e-06	1.3196e-05
YDR504C	74.5538	-0.828545	0.174131	-4.75816	1.95363e-06	1.3386e-05
YDR394W	2799.57	0.278399	0.0585341	4.75619	1.97279e-06	1.35033e-05
YEL011W	8872.3	0.260017	0.0546948	4.75395	1.99476e-06	1.36334e-05
YOR293W	25177.4	-0.29925	0.0629492	-4.75384	1.99588e-06	1.36334e-05
YDL115C	1576.09	0.300577	0.063295	4.74882	2.04603e-06	1.39617e-05
YNL029C	274.131	-0.518554	0.109421	-4.73908	2.14687e-06	1.46348e-05
YDR259C	259.931	-0.566743	0.119602	-4.73859	2.15211e-06	1.46554e-05
YMR135C	2051.4	0.289692	0.0611601	4.73661	2.17323e-06	1.47842e-05
YOR108W	759.589	-0.397041	0.0838442	-4.73546	2.18557e-06	1.4853e-05
YIL133C	11297.2	-0.27283	0.0576214	-4.73488	2.19185e-06	1.48805e-05
YIL064W	1213.89	-0.338686	0.0715341	-4.73462	2.19471e-06	1.48847e-05
YNL186W	400.727	-0.459787	0.0972843	-4.72622	2.28737e-06	1.54973e-05
YGL099W	474.583	-0.457432	0.096834	-4.72388	2.31392e-06	1.56454e-05
YOR231W	346.285	-0.467811	0.0990292	-4.72397	2.31289e-06	1.56454e-05
YDR226W	4324.97	-0.262855	0.055688	-4.72013	2.35692e-06	1.592e-05
YLR146C	420.837	-0.446249	0.0945523	-4.71959	2.36315e-06	1.59459e-05
YML021C	283.452	-0.509834	0.108055	-4.71829	2.3784e-06	1.60325e-05
YMR229C	806.831	-0.416246	0.0882339	-4.71752	2.38732e-06	1.60764e-05
YLL029W	2993.55	0.275091	0.0583235	4.71664	2.39771e-06	1.61301e-05
YKL054C	1708.75	-0.348786	0.0741232	-4.70549	2.53252e-06	1.70198e-05
YLL055W	512.854	-0.426757	0.0906978	-4.70526	2.53543e-06	1.70221e-05
YMR181C	1226.55	0.349655	0.0743454	4.70312	2.56218e-06	1.71844e-05
YHR068W	1312.91	-0.319822	0.0680115	-4.70246	2.57045e-06	1.72225e-05
YJL080C	1623	-0.353304	0.0751875	-4.69898	2.61465e-06	1.75011e-05
YFR051C	858.735	-0.385688	0.0821551	-4.69464	2.67082e-06	1.78591e-05
YBR128C	418.324	0.447507	0.0953518	4.69322	2.68932e-06	1.79648e-05
YBR189W	35047.5	-0.250028	0.0532861	-4.69218	2.70306e-06	1.80385e-05
YOR111W	581.346	0.396669	0.0845514	4.69146	2.71268e-06	1.80846e-05
YJR092W	415.515	-0.496582	0.105861	-4.69087	2.72043e-06	1.81181e-05
YOR189W	1011.52	0.346568	0.0739397	4.68717	2.77005e-06	1.84301e-05
YNL292W	507.462	-0.408351	0.0871434	-4.68596	2.78649e-06	1.8521e-05
YDR016C	589.351	0.407692	0.0870292	4.68455	2.80582e-06	1.86309e-05
YHR041C	279.675	-0.508116	0.108497	-4.68324	2.82374e-06	1.87126e-05
YJL109C	608.778	-0.39424	0.0841788	-4.68336	2.82207e-06	1.87126e-05
YNL296W	263.642	0.576518	0.123258	4.67732	2.90652e-06	1.92229e-05
YNL119W	486.952	-0.415626	0.0888575	-4.67744	2.90472e-06	1.92229e-05
YDR398W	757.054	-0.377265	0.0807399	-4.6726	2.97408e-06	1.96502e-05
YJL047C	672.741	0.378453	0.0810273	4.67068	3.00203e-06	1.98152e-05
YJL155C	2435.74	0.267209	0.0572954	4.6637	3.10574e-06	2.04795e-05
YCR057C	521.218	-0.415543	0.0891398	-4.66169	3.13618e-06	2.06597e-05
YPL265W	2448.13	0.283772	0.060961	4.65498	3.24012e-06	2.13233e-05
YOR223W	869.977	0.352996	0.0758571	4.65344	3.26444e-06	2.14622e-05
YOR146W	784.798	-0.404619	0.0870183	-4.64982	3.32228e-06	2.18209e-05
YDR224C	20091.5	0.312475	0.0673472	4.63977	3.48805e-06	2.28871e-05
YGL234W	819.813	-0.353894	0.0763108	-4.63753	3.52591e-06	2.31127e-05
YHL030W	407.865	0.450763	0.0973458	4.63054	3.64717e-06	2.38724e-05
YMR131C	2378.17	-0.325466	0.0702884	-4.63044	3.64896e-06	2.38724e-05
YOR179C	741.521	0.357756	0.0772971	4.62833	3.68627e-06	2.40928e-05
YKL069W	1033.04	0.350178	0.0757226	4.62449	3.75525e-06	2.45196e-05
YBR173C	1852.91	0.296297	0.0640934	4.6229	3.78418e-06	2.46843e-05
YML088W	385.636	-0.44915	0.097181	-4.62179	3.80447e-06	2.47923e-05
YHR203C	17909.5	-0.224392	0.0485577	-4.62114	3.81633e-06	2.48453e-05
YIL009C-A	749.37	0.360542	0.0780858	4.61725	3.88856e-06	2.52908e-05
YKL150W	6035.5	0.367899	0.0797674	4.61216	3.98516e-06	2.58938e-05
YOR143C	331.032	-0.468145	0.101584	-4.60847	4.05651e-06	2.63317e-05
YIL069C	10262.1	-0.245041	0.0532081	-4.60534	4.11802e-06	2.6705e-05
YGR158C	447.879	-0.442985	0.0961992	-4.60487	4.12729e-06	2.67391e-05
YJR143C	1051.18	-0.329894	0.0717146	-4.6001	4.22297e-06	2.73323e-05
YLR082C	624.423	0.377941	0.0821645	4.59981	4.22871e-06	2.73429e-05
YOR195W	447.013	-0.44942	0.0977163	-4.59923	4.24052e-06	2.73927e-05
YHR072W	953.304	-0.376134	0.0818626	-4.5947	4.33377e-06	2.79679e-05
YGR114C	309.406	0.48811	0.106352	4.58956	4.44186e-06	2.86377e-05
YGL055W	1760.04	-0.325901	0.0710391	-4.58762	4.4832e-06	2.88763e-05
YBL074C	190.125	0.584493	0.127479	4.58502	4.53939e-06	2.921e-05
YLR290C	1000.14	0.341487	0.0745026	4.58355	4.57137e-06	2.93874e-05
YJL158C	3792.27	-0.252267	0.055042	-4.58317	4.57985e-06	2.94135e-05
YPL249C	826.095	0.353247	0.0770841	4.58262	4.59193e-06	2.94627e-05
YDL160C-A	447.285	0.434368	0.0948473	4.57966	4.65732e-06	2.98535e-05
YGL070C	596.711	-0.410831	0.0897163	-4.57922	4.66711e-06	2.98874e-05
YKL151C	1585.36	0.335476	0.0732659	4.57889	4.67451e-06	2.99061e-05
YBL090W	986.678	0.346015	0.075623	4.57552	4.75029e-06	3.03618e-05
YFR028C	385.605	-0.443504	0.096982	-4.57305	4.8067e-06	3.06929e-05
YBL004W	637.218	-0.374888	0.0819816	-4.57282	4.81197e-06	3.0697e-05
YBR298C	789.408	-0.432886	0.0948019	-4.56622	4.96598e-06	3.16492e-05
YML100W	4409.97	-0.316438	0.0693398	-4.56359	5.02866e-06	3.20181e-05
YLR409C	387.731	-0.45244	0.0991826	-4.56169	5.07431e-06	3.22778e-05
YBL028C	809.305	-0.436835	0.0957981	-4.55995	5.1165e-06	3.25152e-05
YMR239C	294.077	-0.499025	0.109477	-4.55826	5.15791e-06	3.27471e-05
YGL035C	1937.46	0.309571	0.0679283	4.55732	5.18097e-06	3.28622e-05
YLL038C	398.939	0.434128	0.0953659	4.55224	5.30782e-06	3.36347e-05
YBR020W	20288.9	0.251579	0.0552925	4.54997	5.36534e-06	3.39669e-05
YDR234W	2176.49	-0.357554	0.0785888	-4.54968	5.37268e-06	3.3981e-05
YOR264W	1168.4	0.333721	0.0734107	4.54595	5.46878e-06	3.4556e-05
YCR031C	30513	0.244817	0.0538646	4.54504	5.49248e-06	3.46559e-05
YDR003W	1231.27	0.317962	0.0699596	4.54494	5.49498e-06	3.46559e-05
YPL059W	1133.01	0.340414	0.0750486	4.53591	5.73552e-06	3.61387e-05
YCL052C	1964.22	0.281525	0.0620767	4.53512	5.75721e-06	3.6241e-05
YBR119W	733.915	0.360453	0.0795095	4.53345	5.80271e-06	3.64929e-05
YOR121C	985.934	0.330596	0.0729378	4.53257	5.82711e-06	3.66115e-05
YPL199C	2976.51	0.286244	0.0631556	4.53237	5.83256e-06	3.66115e-05
YMR095C	231.258	0.514112	0.113441	4.53199	5.84297e-06	3.66424e-05
YBR077C	918.128	0.339558	0.0749331	4.53148	5.85706e-06	3.66962e-05
YML073C	15390	-0.286908	0.0633193	-4.53113	5.86683e-06	3.67228e-05
YDL111C	709.052	-0.365513	0.0807716	-4.52527	6.03178e-06	3.77199e-05
YML074C	6034.8	0.236097	0.0522021	4.52275	6.10418e-06	3.81368e-05
YDL004W	4935.64	0.279361	0.0617824	4.52169	6.13471e-06	3.82575e-05
YHR050W-A	83.5436	-0.814814	0.180202	-4.52168	6.13499e-06	3.82575e-05
YBR211C	576.332	-0.380317	0.0841312	-4.52053	6.16863e-06	3.84313e-05
YOL036W	748.19	-0.367927	0.0814227	-4.51872	6.22139e-06	3.87238e-05
YDL204W	2505.95	0.345077	0.0763826	4.51774	6.2502e-06	3.88305e-05
YDR229W	1043.03	0.321797	0.0712269	4.51791	6.24534e-06	3.88305e-05
YOR352W	1004.79	0.323012	0.0715307	4.51571	6.31045e-06	3.91683e-05
YHR141C	39370.6	0.292932	0.0648962	4.51386	6.36579e-06	3.94434e-05
YJR100C	817.078	0.334834	0.0741794	4.51383	6.36661e-06	3.94434e-05
YCR091W	879.358	0.336453	0.0745596	4.51254	6.40546e-06	3.96472e-05
YHR028C	2340.09	0.270238	0.0599068	4.51097	6.45307e-06	3.99048e-05
YIL014W	647.44	-0.365774	0.0810986	-4.51024	6.47537e-06	4.00055e-05
YJL128C	633.871	-0.387295	0.0858748	-4.51	6.48283e-06	4.00145e-05
YHR029C	1509.74	0.303417	0.0673108	4.5077	6.55348e-06	4.04131e-05
YBR280C	863.857	0.354587	0.0787592	4.50217	6.72639e-06	4.14027e-05
YJR084W	596.72	0.376616	0.0836512	4.50222	6.72479e-06	4.14027e-05
YGL240W	185.648	0.56887	0.126394	4.50077	6.77073e-06	4.16372e-05
YNL320W	246.393	-0.508415	0.112996	-4.49942	6.81388e-06	4.18639e-05
YLL049W	1155.5	0.3423	0.0761115	4.49736	6.8803e-06	4.2233e-05
YPL154C	5130.09	0.308804	0.0686666	4.49714	6.88721e-06	4.22365e-05
YOL052C-A	2558.05	0.403822	0.0898415	4.49482	6.96276e-06	4.26605e-05
YBL061C	580.714	-0.375425	0.0835816	-4.49171	7.06526e-06	4.32487e-05
YPR133C	2260.17	0.268855	0.0598742	4.49034	7.11099e-06	4.34887e-05
YIL038C	541.055	-0.38185	0.0850571	-4.48933	7.14474e-06	4.3655e-05
YDR324C	463.265	-0.419505	0.0934552	-4.48884	7.16137e-06	4.37165e-05
YLR201C	1042.61	0.342929	0.0764003	4.48859	7.16973e-06	4.37275e-05
YIL117C	2023.29	-0.31002	0.0691585	-4.48274	7.36911e-06	4.49024e-05
YKR042W	11893.9	-0.235625	0.052619	-4.47795	7.53629e-06	4.58791e-05
YDR524W-C	5615.71	-0.342748	0.0765689	-4.47633	7.59373e-06	4.61865e-05
YGR162W	1666.42	-0.350522	0.0783686	-4.47274	7.72243e-06	4.69265e-05
YBL081W	119.623	-0.658752	0.147327	-4.47136	7.77242e-06	4.71871e-05
YDL099W	1682.42	0.306643	0.0686108	4.46932	7.84702e-06	4.75967e-05
YMR102C	389.037	-0.441787	0.0988769	-4.46805	7.89362e-06	4.77923e-05
YPL076W	344.375	0.441544	0.0988197	4.46818	7.88882e-06	4.77923e-05
YGR119C	1407.89	-0.291237	0.065214	-4.46587	7.97438e-06	4.82374e-05
YOR107W	115.319	-0.680674	0.152431	-4.46545	7.99017e-06	4.82891e-05
YLR363W-A	403.342	-0.435969	0.0976646	-4.46394	8.04666e-06	4.85863e-05
YDL049C	237.131	-0.503985	0.112909	-4.46363	8.05813e-06	4.86116e-05
YPL196W	1445.33	0.306217	0.068628	4.46199	8.12024e-06	4.89419e-05
YBR129C	768.642	-0.347775	0.0779749	-4.46008	8.19277e-06	4.92077e-05
YHR219C-A	96.0573	-0.696381	0.156134	-4.46016	8.18986e-06	4.92077e-05
YPL227C	396.88	-0.473766	0.106224	-4.46005	8.19389e-06	4.92077e-05
YPR143W	926.887	-0.333008	0.0746634	-4.46012	8.19122e-06	4.92077e-05
YBR266C	226.785	-0.512756	0.114983	-4.4594	8.21893e-06	4.92692e-05
YMR141W-A	192.198	0.562269	0.126082	4.45956	8.2127e-06	4.92692e-05
YMR169C	726.904	0.352083	0.0789604	4.45899	8.23476e-06	4.93197e-05
YPL031C	1657.5	0.30861	0.0692196	4.45842	8.2566e-06	4.94061e-05
YPL149W	1398.27	0.331813	0.0744339	4.45782	8.27975e-06	4.94636e-05
YPR001W	356.302	0.491055	0.110157	4.45779	8.28107e-06	4.94636e-05
YGL127C	169.502	-0.585662	0.131455	-4.45523	8.38019e-06	4.99838e-05
YHL048W	988.843	-0.316544	0.0710512	-4.45516	8.38317e-06	4.99838e-05
YDL137W	4076.89	0.244633	0.0549191	4.45443	8.41153e-06	5.00963e-05
YOR278W	600.544	0.374285	0.084028	4.45429	8.41708e-06	5.00963e-05
YIL051C	3518.88	0.301107	0.0676097	4.4536	8.44409e-06	5.02122e-05
YJL127C-B	821.214	0.404968	0.0909418	4.45305	8.46588e-06	5.02968e-05
YER126C	724.587	-0.35582	0.0799398	-4.45109	8.54349e-06	5.07127e-05
YMR119W	633.154	-0.379439	0.085297	-4.44845	8.64911e-06	5.12939e-05
YPL206C	1331.54	0.30522	0.0687055	4.44244	8.89457e-06	5.27027e-05
YML133W-B	95.942	-0.693629	0.156185	-4.44109	8.95059e-06	5.29404e-05
YNL339W-B	95.942	-0.693629	0.156185	-4.44109	8.95059e-06	5.29404e-05
YLR131C	230.526	-0.519658	0.117053	-4.43953	9.01572e-06	5.32783e-05
YLR097C	955.425	0.329239	0.0742702	4.43299	9.2935e-06	5.48712e-05
YDL018C	852.079	0.350647	0.0791612	4.42952	9.44416e-06	5.56653e-05
YMR085W	498.321	-0.458901	0.103601	-4.42951	9.44472e-06	5.56653e-05
YIL108W	649.928	-0.398836	0.0900585	-4.42863	9.48337e-06	5.57993e-05
YLR029C	74752.9	-0.268751	0.0606853	-4.42861	9.48421e-06	5.57993e-05
YOR260W	883.034	-0.350569	0.0791663	-4.42826	9.49985e-06	5.5842e-05
YKR089C	2455.04	0.269097	0.0607817	4.42726	9.5437e-06	5.60503e-05
YLR237W	256.798	-0.500196	0.113216	-4.41807	9.95867e-06	5.84359e-05
YGR235C	1735.75	0.275354	0.0623323	4.41753	9.98373e-06	5.85313e-05
YDL117W	413.256	-0.494439	0.111971	-4.41578	1.00645e-05	5.89532e-05
YER178W	4311.18	0.281817	0.0638518	4.4136	1.01664e-05	5.94974e-05
YDL177C	143.921	-0.605506	0.137225	-4.41251	1.0218e-05	5.97468e-05
YMR266W	1516	-0.281124	0.0637138	-4.4123	1.02279e-05	5.97522e-05
YGR136W	2244.85	0.274755	0.0622855	4.41123	1.02786e-05	5.9996e-05
YOR103C	957.989	-0.380665	0.0863071	-4.41059	1.0309e-05	6.01207e-05
YBR154C	1863.24	-0.288917	0.0655183	-4.40971	1.03508e-05	6.03116e-05
YIL010W	910.614	0.336648	0.0764077	4.40594	1.05327e-05	6.13179e-05
YEL072W	142.48	-0.602238	0.136723	-4.40481	1.05874e-05	6.15829e-05
YGL004C	875.748	0.331097	0.0751818	4.40395	1.06298e-05	6.17753e-05
YOR048C	904.153	-0.340662	0.0774049	-4.40103	1.07736e-05	6.25566e-05
YGL188C	389.045	0.520583	0.1183	4.40051	1.07996e-05	6.26527e-05
YDL051W	3342.23	-0.251605	0.057183	-4.40001	1.08248e-05	6.27442e-05
YDR202C	1216.18	0.308578	0.0701556	4.39848	1.0901e-05	6.31312e-05
YHR064C	2977.73	-0.298974	0.0679863	-4.39757	1.09471e-05	6.33428e-05
YCR048W	252.018	-0.482919	0.10982	-4.39738	1.09566e-05	6.3343e-05
YPL117C	3482.83	-0.252065	0.0573277	-4.39691	1.09802e-05	6.34241e-05
YOL081W	1787.75	0.29027	0.0660214	4.3966	1.09958e-05	6.3459e-05
YOR058C	351.793	-0.508313	0.115642	-4.39559	1.10475e-05	6.37023e-05
YJR063W	124.493	-0.710415	0.161631	-4.39528	1.1063e-05	6.37366e-05
YIL119C	175.566	-0.57222	0.130217	-4.39436	1.111e-05	6.3952e-05
YNL214W	423.915	0.421747	0.0960483	4.39099	1.12836e-05	6.48951e-05
YOR254C	1206.01	-0.31008	0.0707622	-4.382	1.17594e-05	6.75736e-05
YGR231C	1860.05	0.324651	0.0741649	4.37742	1.20093e-05	6.89501e-05
YDR329C	1409.72	0.288136	0.0658849	4.37332	1.22372e-05	7.01976e-05
YGR187C	331.36	-0.455472	0.104161	-4.37276	1.22686e-05	7.03176e-05
YCR010C	1311.66	0.968904	0.221701	4.37033	1.24061e-05	7.10445e-05
YLR361C-A	418.565	0.403549	0.0924102	4.36693	1.26004e-05	7.20949e-05
YLR373C	402.677	-0.408166	0.0934998	-4.36543	1.26876e-05	7.25314e-05
YLR295C	3255.35	0.285303	0.0653635	4.36487	1.272e-05	7.26546e-05
YCR011C	1566.92	0.27809	0.0637588	4.36159	1.29119e-05	7.36874e-05
YOR134W	746.371	-0.35107	0.0805226	-4.3599	1.30124e-05	7.41977e-05
YKR011C	1117.69	0.325684	0.0747259	4.35838	1.31029e-05	7.46497e-05
YER023W	3322.69	0.260676	0.0598141	4.35811	1.31189e-05	7.46769e-05
YDL148C	794.549	-0.405737	0.0931368	-4.35635	1.32246e-05	7.51799e-05
YHR046C	400.195	-0.451595	0.103668	-4.35615	1.32372e-05	7.51799e-05
YPL001W	333.205	-0.435431	0.0999593	-4.35608	1.32412e-05	7.51799e-05
YBR061C	482.289	-0.390853	0.0898044	-4.35227	1.34738e-05	7.64356e-05
YDR246W	1298.49	0.299584	0.0688508	4.3512	1.35391e-05	7.6741e-05
YHR107C	705.866	-0.377895	0.0868563	-4.35081	1.35638e-05	7.68154e-05
YOL125W	501.477	-0.375177	0.0862779	-4.34847	1.37091e-05	7.75724e-05
YNL176C	1140.5	-0.309535	0.0712173	-4.34634	1.38428e-05	7.82622e-05
YGL121C	673.424	0.439075	0.101154	4.34067	1.42046e-05	8.02399e-05
YER095W	673.715	0.360975	0.0831844	4.33945	1.42839e-05	8.06192e-05
YOR202W	8441.64	0.24692	0.056962	4.33482	1.4588e-05	8.22661e-05
YPL126W	948.02	-0.359259	0.0828984	-4.33373	1.46605e-05	8.26046e-05
YER113C	240.994	-0.50051	0.115504	-4.33326	1.46918e-05	8.27114e-05
YER056C-A	15180.2	-0.233473	0.053932	-4.32902	1.49773e-05	8.42471e-05
YER129W	557.231	-0.372551	0.0861179	-4.32605	1.51805e-05	8.5318e-05
YOL080C	123.108	-0.652186	0.150794	-4.325	1.52531e-05	8.56541e-05
YJR091C	2163.24	0.273169	0.0631869	4.3232	1.53785e-05	8.62854e-05
YDR365C	1390.24	-0.319673	0.0739826	-4.32092	1.55377e-05	8.71055e-05
YKL052C	228.407	-0.491786	0.11383	-4.32036	1.55776e-05	8.72553e-05
YML082W	207.791	-0.522907	0.121092	-4.31827	1.57256e-05	8.80107e-05
YMR174C	368.914	0.500221	0.115953	4.31402	1.60315e-05	8.96472e-05
YNL167C	897.85	-0.313556	0.0727887	-4.30776	1.64914e-05	9.21418e-05
YMR071C	1766.44	0.267742	0.0621668	4.30683	1.65608e-05	9.23903e-05
YOR370C	1545.56	-0.302167	0.0701605	-4.3068	1.65637e-05	9.23903e-05
YCL002C	344.384	-0.422462	0.098098	-4.30652	1.6584e-05	9.24261e-05
YLL035W	103.053	-0.662126	0.15383	-4.30427	1.67535e-05	9.32931e-05
YDL052C	551.341	-0.374111	0.0869894	-4.30065	1.70301e-05	9.47537e-05
YMR282C	679.626	0.354721	0.0825721	4.29589	1.73996e-05	9.67288e-05
YLR118C	913.667	0.327084	0.0761471	4.29541	1.74367e-05	9.68543e-05
YKR076W	833.622	0.34599	0.0805762	4.29395	1.75525e-05	9.74165e-05
YML080W	151.132	-0.578015	0.134676	-4.29188	1.77164e-05	9.82442e-05
YDR391C	1471.61	0.307894	0.0717496	4.29123	1.77683e-05	9.83717e-05
YPL201C	117.033	0.677101	0.157787	4.29123	1.77689e-05	9.83717e-05
YDR025W	15174.2	-0.252995	0.0589706	-4.29018	1.78525e-05	9.86101e-05
YDR045C	596.934	-0.360824	0.0841054	-4.29014	1.78564e-05	9.86101e-05
YNR012W	421.935	-0.407517	0.0949816	-4.29049	1.78282e-05	9.86101e-05
YJR032W	337.413	-0.446989	0.104211	-4.28928	1.79249e-05	9.89064e-05
YKR051W	463.547	-0.405268	0.0945171	-4.28777	1.80476e-05	9.95006e-05
YPL141C	362.864	-0.478511	0.11161	-4.28733	1.80831e-05	9.9614e-05
YBR127C	5938.2	0.236898	0.0553101	4.28308	1.84325e-05	0.000101455
YPR150W	1334.25	0.737146	0.172184	4.28116	1.85925e-05	0.000102251
YJR104C	24444	0.301547	0.070538	4.27496	1.9117e-05	0.000105038
YOR287C	150.24	-0.596863	0.139624	-4.2748	1.91308e-05	0.000105038
YPR191W	5136.58	0.325128	0.0760968	4.27256	1.93243e-05	0.000106013
YOR225W	71.0424	-0.751478	0.17597	-4.27049	1.95044e-05	0.000106913
YJL138C	8681.12	-0.277982	0.0651118	-4.2693	1.96083e-05	0.000107394
YBR218C	2638.78	-0.268726	0.0629673	-4.26772	1.97485e-05	0.000108073
YLR185W	12479.2	0.275332	0.0645672	4.26427	2.00555e-05	0.000109663
YDR359C	342.869	-0.450493	0.105681	-4.26276	2.01918e-05	0.000110318
YFL037W	3089.99	-0.234931	0.0551337	-4.26111	2.03411e-05	0.000111043
YDR211W	1014.87	-0.322518	0.0757656	-4.25679	2.07382e-05	0.000113118
YNL289W	47.693	-0.848833	0.199473	-4.25538	2.08692e-05	0.000113739
YDL235C	1518.13	-0.287482	0.0676071	-4.25224	2.1164e-05	0.000115251
YKL101W	426.522	-0.412675	0.0970587	-4.25181	2.1205e-05	0.00011538
YDR151C	1125.11	0.298014	0.0701159	4.2503	2.13481e-05	0.000116064
YER104W	369.935	0.423263	0.0998148	4.24048	2.23042e-05	0.000121163
YBR193C	611.822	0.348394	0.0821749	4.23966	2.23857e-05	0.000121507
YDR184C	210.464	-0.504608	0.119027	-4.23944	2.24081e-05	0.000121529
YER087W	571.732	0.360036	0.0849667	4.23737	2.26151e-05	0.000122552
YIL046W	450.63	-0.391894	0.0925836	-4.23287	2.30733e-05	0.000124918
YIL047C-A	116.125	-0.6173	0.14584	-4.23271	2.30892e-05	0.000124918
YBR121C	4831.52	-0.281877	0.0666334	-4.23027	2.33414e-05	0.00012618
YBL003C	7570.06	0.283186	0.0669529	4.22963	2.34079e-05	0.000126437
YPL163C	1341.1	0.28161	0.0665998	4.22839	2.35365e-05	0.000127028
YGL104C	570.536	0.394409	0.0932817	4.22815	2.35626e-05	0.000127066
YAL016W	2697.42	0.250744	0.0593408	4.22549	2.38424e-05	0.00012844
YGL044C	401.28	-0.402538	0.0952713	-4.22518	2.38751e-05	0.00012844
YPL051W	287.424	-0.467547	0.110655	-4.22528	2.38644e-05	0.00012844
YAR007C	830.122	0.342005	0.0809719	4.22374	2.40278e-05	0.000129157
YOR062C	879.089	-0.315635	0.0747355	-4.22337	2.4068e-05	0.000129268
YKL193C	1354.24	0.304045	0.0720883	4.21767	2.46838e-05	0.000132469
YHR110W	1440.49	0.308291	0.0731142	4.21657	2.48043e-05	0.000133009
YHR206W	482.654	-0.386168	0.0916163	-4.21506	2.49709e-05	0.000133794
YGL223C	856.869	0.323371	0.0767518	4.21321	2.51769e-05	0.000134681
YNL303W	333.939	-0.450391	0.106896	-4.21335	2.51611e-05	0.000134681
YOR105W	248.81	-0.468355	0.111186	-4.21238	2.52699e-05	0.00013507
YGL209W	257.667	-0.46146	0.109822	-4.2019	2.64683e-05	0.000141363
YPL207W	1603.08	-0.286683	0.06829	-4.19801	2.69265e-05	0.000143694
YER101C	427.405	0.383777	0.0914669	4.1958	2.71911e-05	0.000144949
YJL033W	842.829	-0.330071	0.0786691	-4.19568	2.72052e-05	0.000144949
YKL161C	684.782	-0.331687	0.0790886	-4.19387	2.74238e-05	0.000145997
YBL113W-A	107.672	-0.632916	0.151114	-4.18833	2.81011e-05	0.000149484
YIL068C	1001.81	0.304884	0.0728042	4.18772	2.81771e-05	0.000149768
YOL021C	572.752	-0.364534	0.0870561	-4.18735	2.82235e-05	0.000149895
YPR072W	2186.42	0.254734	0.0608978	4.18297	2.87726e-05	0.00015269
YOL041C	816.218	-0.380373	0.0910285	-4.17861	2.93299e-05	0.000155523
YIL002W-A	1594.73	0.299171	0.0716489	4.17551	2.97319e-05	0.000157529
YLR443W	531.867	-0.38321	0.0918205	-4.17347	2.99994e-05	0.00015882
YNR047W	658.88	0.3406	0.0816211	4.17294	3.00697e-05	0.000159066
YNL290W	625.417	-0.353932	0.0849062	-4.16851	3.066e-05	0.00016206
YGR260W	1663.08	-0.269235	0.0645912	-4.1683	3.06881e-05	0.00016208
YNL243W	771.092	-0.331566	0.07963	-4.16383	3.1296e-05	0.000165159
YIL018W	27234.6	-0.199563	0.0479467	-4.16219	3.15212e-05	0.000166216
YGL009C	9890.59	0.28209	0.0678335	4.15857	3.20249e-05	0.000168739
YLR100W	2810.23	0.245472	0.0590666	4.15585	3.24077e-05	0.000170621
YLR354C	9013.62	0.20587	0.0495735	4.15283	3.28389e-05	0.000172754
YDL106C	1062.44	0.328235	0.0790795	4.1507	3.3146e-05	0.000174232
YOR065W	4046.83	0.339627	0.0821101	4.13624	3.53047e-05	0.000185433
YBR261C	458.16	-0.372259	0.0900545	-4.13371	3.56952e-05	0.000187336
YGR113W	623.023	0.33144	0.0802584	4.12966	3.63307e-05	0.000190372
YHR160C	257.446	0.52387	0.126853	4.12975	3.63158e-05	0.000190372
YKR034W	219.973	0.522998	0.126689	4.1282	3.65614e-05	0.00019143
YIL109C	1418.6	-0.285624	0.0692007	-4.12747	3.66777e-05	0.000191888
YGL123W	50517.3	-0.212252	0.0514639	-4.1243	3.71867e-05	0.000194398
YLR346C	82.2121	-0.741929	0.179953	-4.12291	3.74124e-05	0.000195425
YBR283C	3214.57	-0.238475	0.0578862	-4.11973	3.79323e-05	0.000197985
YER079C-A	259.258	0.455335	0.11057	4.11808	3.82037e-05	0.00019904
YGR245C	955.776	-0.32717	0.0794427	-4.11832	3.81646e-05	0.00019904
YNL313C	285.328	-0.434396	0.105488	-4.11796	3.8224e-05	0.00019904
YBR220C	381.017	-0.400265	0.0972723	-4.11489	3.87358e-05	0.00020139
YHL031C	880.8	0.306396	0.0744587	4.11499	3.87204e-05	0.00020139
YGR116W	2292.95	0.274006	0.0666363	4.11197	3.92299e-05	0.0002038
YOR376W-A	301.338	0.445665	0.108518	4.10681	4.01157e-05	0.000208239
YMR310C	513.739	-0.367347	0.0895183	-4.1036	4.06776e-05	0.000210992
YER037W	658.094	0.338207	0.0824317	4.10288	4.08043e-05	0.000211484
YBL103C	929.268	-0.327271	0.0798389	-4.09915	4.14676e-05	0.000214754
YAL034C	1061.12	0.28144	0.0687053	4.09633	4.19745e-05	0.000217093
YER061C	561.295	0.370752	0.0905094	4.09628	4.19844e-05	0.000217093
YHR190W	4756.41	0.25159	0.0614723	4.09273	4.26323e-05	0.000220273
YER149C	245.995	-0.466339	0.113979	-4.09144	4.28709e-05	0.000221333
YML081W	354.39	-0.402635	0.0985993	-4.08355	4.43535e-05	0.000228811
YLR147C	557.052	-0.345143	0.0845496	-4.08213	4.46247e-05	0.000230031
YLR009W	2183.84	-0.251563	0.0616495	-4.08054	4.49309e-05	0.000231431
YIL105C	2016.73	0.266582	0.0653346	4.08026	4.4985e-05	0.00023153
YGL211W	575.727	-0.386533	0.09482	-4.07649	4.57204e-05	0.000235134
YOL139C	7085.54	-0.245475	0.0602541	-4.074	4.62133e-05	0.000237485
YCL005W-A	1710.92	0.31798	0.0780888	4.07204	4.6604e-05	0.000239308
YOL130W	646.624	-0.325085	0.079897	-4.0688	4.7255e-05	0.000242464
YDR183C-A	36.2442	-0.84352	0.207514	-4.06487	4.80589e-05	0.000246399
YDL222C	603.112	0.444858	0.109479	4.06341	4.8361e-05	0.000247566
YPL024W	782.585	-0.322756	0.079427	-4.06355	4.83317e-05	0.000247566
YMR189W	216.104	0.487582	0.12002	4.06251	4.85475e-05	0.000248331
YIL114C	210.509	-0.499684	0.123027	-4.06159	4.87388e-05	0.000249118
YOR241W	437.035	-0.399331	0.09836	-4.05989	4.90967e-05	0.000250755
YPL259C	1026.02	0.287499	0.0709065	4.05462	5.02167e-05	0.000256278
YLR151C	536.265	0.361465	0.089172	4.05357	5.04411e-05	0.000257226
YOL051W	1080.49	-0.279771	0.0690739	-4.05031	5.11497e-05	0.00026064
YDL198C	1966.65	-0.261991	0.0647327	-4.04727	5.1818e-05	0.000263844
YGR086C	10185.3	0.257803	0.0637249	4.04556	5.21975e-05	0.00026537
YNL035C	705.452	-0.338618	0.0836994	-4.04564	5.21798e-05	0.00026537
YNL246W	1127.47	0.279513	0.0691031	4.04487	5.23526e-05	0.000265903
YNL103W	917.718	-0.299845	0.0741321	-4.04474	5.23821e-05	0.000265903
YLR129W	394.658	-0.389697	0.0963554	-4.04438	5.24629e-05	0.00026611
YBR175W	117.394	-0.62484	0.154512	-4.04397	5.2554e-05	0.000266369
YEL015W	1968.55	0.248603	0.0615268	4.04056	5.33243e-05	0.000270068
YKR095W	1720.19	0.268638	0.0665072	4.03923	5.36279e-05	0.0002714
YDL158C	108.999	-0.609702	0.151118	-4.03462	5.46915e-05	0.000276572
YER186C	1004.09	0.28381	0.0703715	4.03302	5.50654e-05	0.000278252
YMR204C	362.998	0.399875	0.099234	4.02962	5.58673e-05	0.00028209
YAL016C-A	398.024	0.384041	0.0955425	4.01958	5.83024e-05	0.000294162
YOR359W	68.3227	-0.744909	0.185346	-4.01901	5.84423e-05	0.000294645
YDL194W	776.395	0.333237	0.0829616	4.01676	5.90032e-05	0.000297023
YOR341W	907.826	-0.346219	0.0861925	-4.01681	5.89919e-05	0.000297023
YPL039W	203.928	-0.484705	0.120693	-4.01602	5.91887e-05	0.000297732
YJR066W	846.095	0.294218	0.0732801	4.01498	5.94509e-05	0.000298825
YOR067C	453.196	-0.381425	0.095005	-4.01479	5.9499e-05	0.000298841
YBR088C	442.859	-0.388099	0.0966899	-4.01385	5.97371e-05	0.000299693
YDR435C	1575.17	0.275382	0.0686096	4.01376	5.97586e-05	0.000299693
YML035C	520.228	-0.386404	0.0963311	-4.0112	6.04105e-05	0.000302734
YKL019W	1189.26	0.270055	0.0673299	4.01092	6.0482e-05	0.000302865
YER190C-A	61.0526	-0.724713	0.180746	-4.00957	6.08306e-05	0.00030347
YGR296C-A	61.0526	-0.724713	0.180746	-4.00957	6.08306e-05	0.00030347
YML133W-A	61.0526	-0.724713	0.180746	-4.00957	6.08306e-05	0.00030347
YNL339W-A	61.0526	-0.724713	0.180746	-4.00957	6.08306e-05	0.00030347
YPL283W-A	61.0526	-0.724713	0.180746	-4.00957	6.08306e-05	0.00030347
YLR246W	368.594	-0.409996	0.102265	-4.00913	6.09422e-05	0.000303799
YGR277C	367.7	-0.413803	0.103246	-4.00793	6.12532e-05	0.000305121
YBR249C	9700.1	0.251703	0.0628223	4.00658	6.16044e-05	0.000306641
YKL219W	201.915	-0.500965	0.125099	-4.00454	6.21391e-05	0.000309071
YPL269W	431.897	0.375924	0.0939065	4.00318	6.24977e-05	0.000310623
YDL147W	5865.83	0.21987	0.0549297	4.00275	6.26109e-05	0.000310953
YDL060W	497.075	-0.379215	0.0947572	-4.00196	6.28197e-05	0.000311758
YHR205W	776.943	-0.318291	0.0795639	-4.00044	6.32239e-05	0.00031353
YGL175C	99.4092	0.612983	0.153336	3.99763	6.39786e-05	0.000317037
YPL127C	1566.69	0.272548	0.0682115	3.99564	6.45208e-05	0.000319486
YDR341C	3045.26	-0.26513	0.0663594	-3.99537	6.45943e-05	0.000319612
YFR050C	2610	0.250449	0.062714	3.99351	6.51014e-05	0.000321882
YEL041W	410.394	0.410096	0.102702	3.99307	6.52221e-05	0.00032224
YOR327C	2569.17	0.252632	0.0632866	3.99188	6.55527e-05	0.000323633
YBR126C	7475.2	0.241941	0.0606246	3.9908	6.58507e-05	0.000324476
YKR072C	1023.2	-0.304089	0.0761987	-3.99073	6.58696e-05	0.000324476
YNL005C	1554.86	0.253954	0.0636345	3.99082	6.58448e-05	0.000324476
YNL046W	2088.5	0.316873	0.0794092	3.99038	6.59676e-05	0.000324719
YBR019C	19049.8	0.207417	0.0519842	3.99001	6.60702e-05	0.000324983
YMR301C	524.393	-0.364214	0.0912964	-3.98936	6.62524e-05	0.000325639
YDR416W	637.531	0.331292	0.0830559	3.98879	6.64122e-05	0.000326184
YPL226W	444.258	-0.37679	0.0944821	-3.98795	6.66456e-05	0.000327089
YKL186C	1033.24	-0.283074	0.0710189	-3.9859	6.72259e-05	0.000329694
YER141W	2075.76	0.257846	0.0646963	3.98548	6.73451e-05	0.000330036
YMR046C	507.508	0.347819	0.0872779	3.98519	6.7426e-05	0.000330189
YDL081C	50335.2	0.284199	0.0713382	3.98382	6.7817e-05	0.000331585
YGR201C	796.333	0.312436	0.0784327	3.98349	6.79102e-05	0.000331585
YOR102W	933.923	-0.348399	0.0874583	-3.9836	6.7879e-05	0.000331585
YPR114W	549.878	-0.361911	0.0908512	-3.98355	6.78924e-05	0.000331585
YGR247W	743.905	0.312219	0.0783868	3.98305	6.80356e-05	0.000331954
YIL004C	367.353	-0.39541	0.0992787	-3.98283	6.81001e-05	0.000332026
YMR125W	866.59	-0.309822	0.0778191	-3.98132	6.85349e-05	0.000333901
YMR213W	535.922	0.333103	0.0837201	3.97876	6.92747e-05	0.000337258
YCR087C-A	651.127	-0.345356	0.0868275	-3.97749	6.96459e-05	0.000338818
YKR044W	283.779	-0.444583	0.111799	-3.97661	6.99053e-05	0.000339832
YBR252W	623.539	-0.360698	0.0910636	-3.96094	7.4654e-05	0.000362652
YDR380W	508.892	0.357205	0.0902004	3.96013	7.49086e-05	0.000363623
YDR282C	723.373	0.327913	0.0828359	3.95858	7.53968e-05	0.000365581
YJL110C	1538.02	0.271588	0.0686088	3.9585	7.54217e-05	0.000365581
YCL034W	1696.67	0.264606	0.066852	3.95809	7.55503e-05	0.000365938
YPR154W	1674.55	0.272131	0.0687717	3.95702	7.58902e-05	0.000367317
YPR151C	1661.32	0.702941	0.177662	3.95663	7.6015e-05	0.000367654
YDL199C	389.377	0.381638	0.0965163	3.95414	7.6812e-05	0.000371239
YBR248C	763.198	-0.328132	0.0830017	-3.95332	7.70751e-05	0.000372241
YNR001C	9789.88	0.306216	0.0774861	3.95189	7.75367e-05	0.000374199
YOR356W	1371.97	0.311081	0.078781	3.94868	7.85829e-05	0.000378699
YPR127W	1019.25	0.275233	0.0697026	3.94868	7.85821e-05	0.000378699
YBR115C	15298.2	-0.214623	0.0543646	-3.94784	7.88586e-05	0.000379753
YMR139W	1684.48	0.261031	0.0661824	3.94411	8.00961e-05	0.000385433
YFL066C	131.106	-0.553499	0.140384	-3.94275	8.05513e-05	0.000387065
YGR038W	401.529	-0.419982	0.106518	-3.94282	8.05278e-05	0.000387065
YFL028C	2392.35	0.250261	0.0635493	3.93807	8.21411e-05	0.000394419
YCR087W	660.699	-0.341881	0.0868238	-3.93764	8.22855e-05	0.000394544
YDR364C	275.923	-0.421095	0.10694	-3.93769	8.22699e-05	0.000394544
YLR178C	3010.28	0.607851	0.154546	3.93314	8.38418e-05	0.000401717
YER074W-A	2372.81	0.271186	0.0689646	3.93225	8.4155e-05	0.000402638
YMR134W	646.717	0.329533	0.0838004	3.93236	8.41148e-05	0.000402638
YGL129C	772.893	0.311489	0.0792312	3.9314	8.44534e-05	0.000403486
YHL050W-A	97.9967	-0.620799	0.157904	-3.93149	8.44203e-05	0.000403486
YNL047C	291.818	-0.426898	0.108619	-3.93025	8.48574e-05	0.000405126
YJR099W	954.269	0.317187	0.0807131	3.9298	8.50154e-05	0.000405589
YCR073W-A	830.396	0.304653	0.0775582	3.92805	8.56362e-05	0.000408259
YMR203W	1755.03	0.257491	0.0655655	3.92723	8.59308e-05	0.00040937
YLR403W	290.121	-0.420184	0.107006	-3.92673	8.61094e-05	0.000409928
YNL164C	161.353	-0.520018	0.132495	-3.9248	8.68023e-05	0.000412931
YKR059W	10525.6	-0.246393	0.0627979	-3.92358	8.72431e-05	0.000414731
YAL001C	864.49	0.322574	0.0822211	3.92325	8.73636e-05	0.000415008
YBR201W	635.725	0.316761	0.0807474	3.92286	8.75023e-05	0.000415371
YER001W	404.149	-0.367944	0.0938012	-3.92259	8.76015e-05	0.000415546
YLR436C	484.614	-0.361117	0.0921031	-3.92079	8.82586e-05	0.000418364
YNL266W	669.513	0.310477	0.0792468	3.91785	8.93434e-05	0.000423205
YER144C	726.909	-0.314592	0.0803322	-3.91614	8.99781e-05	0.000425909
YDR461C-A	294.851	0.477217	0.121964	3.91277	9.12428e-05	0.000431407
YML054C	3386.17	0.785581	0.200777	3.9127	9.12692e-05	0.000431407
YML026C	23321.2	-0.230374	0.0589844	-3.90567	9.39633e-05	0.000443826
YOL005C	947.599	-0.320297	0.0820375	-3.90428	9.45081e-05	0.000446084
YAL055W	396.793	0.390591	0.100132	3.90076	9.58918e-05	0.000452215
YOR075W	893.482	0.307007	0.0787071	3.90063	9.59429e-05	0.000452215
YJR135W-A	696.341	0.30399	0.0780047	3.89708	9.73598e-05	0.000458569
YKR001C	2930.81	0.246838	0.0633649	3.8955	9.79944e-05	0.000461231
YCR016W	1103.38	-0.358315	0.0919919	-3.89507	9.81686e-05	0.000461725
YGR217W	190.736	-0.488348	0.125484	-3.89171	9.95406e-05	0.000467848
YLR222C	368.241	-0.380287	0.0977323	-3.89111	9.97876e-05	0.000468678
YNL252C	852.649	0.285912	0.073519	3.88895	0.000100677	0.000472521
YDR382W	66599.7	0.268903	0.0691991	3.88594	0.000101936	0.000478095
YPL013C	794.474	0.294145	0.0757168	3.8848	0.000102413	0.000479992
YDR389W	518.491	-0.340723	0.0877412	-3.88328	0.000103058	0.000482677
YOR032C	244.565	-0.458438	0.118062	-3.88301	0.000103171	0.000482865
YMR170C	725.166	0.308278	0.0794179	3.88172	0.00010372	0.000485095
YOL040C	44004.2	-0.242041	0.0623622	-3.88121	0.00010394	0.000485781
YLR376C	136.085	-0.563462	0.145222	-3.88001	0.00010445	0.000487825
YFL048C	1072.06	-0.333776	0.0860607	-3.87839	0.000105152	0.000490697
YLR411W	353.397	0.789394	0.203544	3.87825	0.000105213	0.000490697
YKL141W	3573.13	0.279256	0.0721827	3.86874	0.0001094	0.000509872
YDR174W	4406.03	0.207901	0.0538279	3.86234	0.000112306	0.000522817
YPL232W	3679.09	0.211752	0.0548256	3.86228	0.000112335	0.000522817
YFR015C	5410.34	0.225159	0.0583008	3.86202	0.000112452	0.000522998
YKL085W	5752.61	0.257193	0.0666318	3.85991	0.000113428	0.000527168
YDL025W-A	163.341	-0.496109	0.128541	-3.85953	0.000113605	0.000527621
YGR271C-A	567.017	-0.335166	0.0868772	-3.85792	0.000114354	0.000530732
YAL056W	1242.1	0.25441	0.0659575	3.85718	0.000114701	0.000531321
YMR168C	549.853	0.332765	0.0862663	3.85742	0.000114592	0.000531321
YNL308C	1740.9	-0.276191	0.0716051	-3.85714	0.000114721	0.000531321
YDL100C	3255.1	0.218212	0.0566056	3.85496	0.000115747	0.000535703
YDR157W	124.264	-0.55504	0.144023	-3.85383	0.000116282	0.000537805
YOL111C	1221.43	0.258857	0.0672179	3.85102	0.000117629	0.000543657
YDR363W-A	2547.38	0.302837	0.0786631	3.8498	0.000118213	0.000545601
YGL120C	749.343	-0.31455	0.0817055	-3.84981	0.000118212	0.000545601
YOR145C	2072.39	-0.253063	0.0657518	-3.84877	0.000118714	0.000547532
YHR005C-A	1648.01	-0.276837	0.0719402	-3.84816	0.000119009	0.00054851
YIL057C	1590.73	0.870778	0.226303	3.84785	0.00011916	0.000548828
YNL294C	1643.92	-0.246612	0.0641036	-3.84709	0.000119529	0.000550147
YER184C	445.037	-0.385261	0.100156	-3.8466	0.000119767	0.000550861
YCL010C	556.492	0.33708	0.0876764	3.8446	0.00012075	0.000554998
YOR233W	157.584	-0.513874	0.133694	-3.84366	0.000121213	0.000556744
YDL237W	1299.51	0.255806	0.0665565	3.84345	0.000121319	0.000556846
YLR258W	3145.04	0.216726	0.0564027	3.84247	0.000121803	0.000558682
YOR261C	4266.72	0.236387	0.0615287	3.84189	0.00012209	0.000559614
YDL224C	340.653	-0.427183	0.111273	-3.83905	0.00012351	0.000565734
YLR427W	512.296	-0.330705	0.0861515	-3.83864	0.000123717	0.000565905
YMR242C	25310.2	-0.254069	0.066186	-3.83872	0.00012368	0.000565905
YIL177W-A	100.4	-0.593787	0.15472	-3.83781	0.000124134	0.000567032
YJL225W-A	100.4	-0.593787	0.15472	-3.83781	0.000124134	0.000567032
YML038C	554.056	-0.332714	0.0867085	-3.83716	0.000124465	0.000568153
YDR231C	734.587	0.324027	0.084461	3.83641	0.000124848	0.000569514
YBR263W	2065.46	-0.250413	0.0652872	-3.83556	0.000125278	0.000571082
YIR010W	451.25	-0.364399	0.0950347	-3.83437	0.000125884	0.000573454
YCL065W	57.1662	0.71452	0.186502	3.83117	0.000127535	0.000580576
YGR259C	407.322	-0.361803	0.0945141	-3.82804	0.00012917	0.000587618
YDR242W	592.372	0.319102	0.0834277	3.82489	0.000130831	0.00059436
YOR362C	2905.34	0.221494	0.0579074	3.82497	0.00013079	0.00059436
YKL053W	91.2651	-0.605785	0.158397	-3.82448	0.000131046	0.000594933
YDR098C	2138.89	0.228812	0.0598492	3.82314	0.000131763	0.00059778
YJR112W-A	768.825	0.3409	0.0892121	3.82123	0.000132789	0.000602027
YDR210W	1576.71	0.273176	0.0715731	3.81674	0.000135227	0.000612662
YLR093C	2851.84	0.233236	0.0611233	3.81583	0.000135728	0.000614514
YNL031C	30703.8	0.242069	0.0635093	3.81155	0.000138098	0.000624819
YNL330C	1476.64	0.247803	0.0650501	3.80941	0.000139297	0.000629816
YDL005C	1212.43	0.266274	0.0699249	3.808	0.000140093	0.000632984
YBR204C	998.395	0.269489	0.0707828	3.80727	0.000140508	0.000634428
YDR279W	636.204	0.311295	0.0817843	3.80629	0.000141064	0.00063651
YMR090W	1423.23	0.327131	0.0859811	3.80469	0.000141983	0.000640221
YMR013C	203.752	-0.455456	0.119793	-3.80203	0.000143513	0.000646683
YJR103W	2743.3	0.233116	0.0613536	3.79955	0.00014496	0.00065276
YNL138W-A	535.421	0.341522	0.0899121	3.7984	0.000145632	0.000655343
YPL074W	1114.5	0.266681	0.0702198	3.7978	0.000145984	0.000656483
YPL136W	149.394	0.54741	0.144408	3.79072	0.000150213	0.000675044
YEL059W	62.1189	-0.685516	0.180999	-3.7874	0.000152235	0.000683672
YPR181C	1250.94	-0.273403	0.0722197	-3.78572	0.000153266	0.00068784
YKR016W	2077.2	0.259713	0.0686363	3.7839	0.000154392	0.000692424
YDL160C	1466.15	0.284542	0.0752291	3.78233	0.000155365	0.000696317
YCL029C	382.331	-0.369285	0.0976531	-3.7816	0.000155822	0.00069743
YPR120C	293.856	0.396799	0.104927	3.78168	0.000155773	0.00069743
YGL019W	1888.69	0.244867	0.0647764	3.78018	0.000156713	0.000700945
YFR024C-A	1235.73	0.257823	0.0682169	3.77946	0.000157171	0.000702521
YKL168C	589.043	0.334304	0.088573	3.77433	0.000160436	0.000716637
YJL163C	482.534	0.361097	0.0957307	3.77201	0.000161939	0.000722866
YGR093W	455.771	-0.338562	0.0898586	-3.76771	0.000164749	0.000734422
YHR196W	374.339	-0.393343	0.104397	-3.76776	0.000164722	0.000734422
YBR233W-A	323.901	-0.419131	0.111264	-3.767	0.000165224	0.000735607
YMR037C	428.175	-0.345429	0.0916992	-3.76698	0.000165235	0.000735607
YHR146W	4145.43	0.235805	0.0627531	3.75767	0.000171505	0.000763006
YBR014C	1385.67	0.27824	0.0741175	3.75403	0.000174011	0.00077364
YCL020W	544.121	0.324601	0.0865012	3.75256	0.000175041	0.0007777
YLR057W	250.55	-0.431977	0.115163	-3.75101	0.000176123	0.000781985
YKL145W-A	265.035	0.404059	0.107746	3.75012	0.000176753	0.000784259
YDR334W	1293.43	0.260451	0.0694552	3.74992	0.000176894	0.000784363
YJR007W	2847.93	-0.262871	0.0701078	-3.74953	0.000177165	0.000785042
YNL154C	1503.96	-0.260412	0.0694603	-3.74908	0.000177484	0.000785933
YLL052C	153.026	-0.509616	0.135946	-3.74867	0.000177773	0.000786688
YPR046W	182.931	-0.463957	0.123914	-3.7442	0.000180968	0.000800295
YGR079W	38.4164	-0.765146	0.204387	-3.74361	0.000181397	0.00080166
YPL139C	487.721	-0.326278	0.0871907	-3.74212	0.000182472	0.000805879
YNL326C	317.491	-0.427519	0.1143	-3.74032	0.000183788	0.000811151
YLR378C	1532.83	-0.242098	0.0647403	-3.73953	0.000184368	0.000813172
YGL164C	871.908	0.275222	0.0736683	3.73597	0.000186994	0.000823665
YOR196C	1422.73	-0.261206	0.0699149	-3.73606	0.000186927	0.000823665
YDL026W	213.692	0.454719	0.121751	3.73484	0.000187831	0.000826804
YDR206W	859.109	-0.290797	0.0779034	-3.73279	0.000189372	0.000833037
YBR089W	328.352	-0.402511	0.107869	-3.73147	0.000190363	0.000836845
YNL053W	325.441	-0.378991	0.10161	-3.72986	0.000191586	0.000841663
YDR296W	864.046	0.283679	0.0761232	3.72657	0.000194103	0.000852157
YOR040W	553.152	0.329553	0.0884918	3.72411	0.000196006	0.000859946
YOR151C	1261.03	-0.259082	0.0696014	-3.72237	0.000197363	0.000865331
YBL064C	2852.53	0.315241	0.0847025	3.72174	0.000197853	0.000866908
YDL050C	1794.66	-0.241494	0.0649118	-3.72035	0.000198948	0.000871133
YBL022C	1066.39	0.261204	0.0702322	3.71915	0.000199894	0.000874698
YNL264C	472.857	-0.327637	0.0881085	-3.71857	0.000200358	0.000876153
YGL212W	308.09	0.381752	0.10271	3.71681	0.000201756	0.000881689
YEL020W-A	1212.62	-0.261001	0.0702347	-3.71613	0.000202298	0.000882898
YHL039W	385.254	-0.36222	0.0974685	-3.71627	0.000202182	0.000882898
YBR159W	1652.12	-0.24856	0.0669263	-3.71393	0.000204067	0.000890038
YJR036C	469.476	0.332883	0.0896381	3.71363	0.000204305	0.00089049
YGL056C	556.685	-0.34848	0.0939141	-3.71063	0.000206747	0.000900548
YNL123W	429.428	-0.361399	0.0974088	-3.71012	0.000207157	0.000901744
YEL057C	964.77	0.310425	0.0837014	3.70872	0.00020831	0.000906168
YDR099W	6846.65	0.194526	0.0524778	3.70682	0.000209877	0.000911796
YOR008C	1444.65	-0.24707	0.0666511	-3.70691	0.0002098	0.000911796
YBL097W	323.227	0.380895	0.102769	3.70632	0.000210293	0.000913007
YIR005W	510.961	0.338398	0.0913176	3.70572	0.000210792	0.000914576
YJL092W	332.507	-0.375017	0.10122	-3.70498	0.000211405	0.00091664
YKR062W	1196.94	0.246891	0.0666654	3.70344	0.000212698	0.000921644
YJL188C	34048.2	0.229284	0.0619226	3.70275	0.000213276	0.000923547
YOR083W	235.193	0.422789	0.114227	3.70131	0.000214493	0.000928216
YAL054C	968.513	0.666539	0.180284	3.69716	0.000218022	0.000942876
YHR104W	1852.81	0.261817	0.0708224	3.69681	0.000218321	0.000942945
YJR070C	1814.72	-0.268993	0.0727606	-3.69697	0.000218191	0.000942945
YGL117W	4599.81	0.255203	0.0691081	3.69281	0.00022179	0.000957304
YBR295W	445.934	-0.339394	0.0919436	-3.69133	0.000223085	0.00096227
YMR022W	1930.93	0.270522	0.0733372	3.68875	0.000225362	0.000971463
YNL143C	146.692	0.494895	0.134188	3.68806	0.000225971	0.000973457
YOR076C	336.868	-0.366557	0.0994569	-3.68559	0.000228175	0.000982319
YBR271W	269.827	-0.405305	0.110042	-3.68318	0.000230344	0.000991017
YOR031W	507.009	0.372491	0.101153	3.68246	0.000230995	0.000993174
YGR030C	364.684	-0.362074	0.0983703	-3.68073	0.000232568	0.000999293
YDR302W	378.406	-0.358171	0.0973697	-3.67846	0.000234643	0.00100756
YOR263C	329.941	0.379298	0.103155	3.67696	0.000236033	0.00101287
YLR382C	488.667	0.323353	0.0879648	3.67593	0.000236985	0.0010163
YOR377W	301.186	-0.459448	0.125031	-3.67466	0.000238164	0.0010207
YDR178W	2521.06	0.269548	0.0733596	3.67434	0.000238462	0.00102132
YCR028C	344.058	-0.368533	0.10046	-3.66844	0.000244038	0.00104453
YMR059W	663.453	0.326022	0.0888835	3.66797	0.000244488	0.00104579
YOR080W	529.008	-0.309746	0.0845095	-3.66523	0.000247121	0.00105637
YNL240C	472.105	-0.32487	0.0886542	-3.66447	0.000247854	0.00105882
YMR196W	2686.3	0.264729	0.0722704	3.66304	0.000249238	0.00106406
YGL242C	365.038	-0.353928	0.0966703	-3.66119	0.000251049	0.0010711
YML049C	516.428	-0.318861	0.0871313	-3.65955	0.000252659	0.00107728
YKL164C	7296.35	0.292493	0.0799803	3.65706	0.000255124	0.00108709
YGR130C	4851.01	0.207182	0.0566704	3.65591	0.000256273	0.00109129
YBR001C	756.894	0.292269	0.0799511	3.65559	0.000256589	0.00109194
YJL140W	4732.77	0.229645	0.0628966	3.65114	0.000261074	0.00110976
YKL047W	497.478	-0.333922	0.0914577	-3.65111	0.00026111	0.00110976
YKL013C	3502.42	0.256589	0.0703036	3.64973	0.000262512	0.00111501
YBR025C	9969.75	0.212177	0.0581428	3.64924	0.000263016	0.00111643
YMR035W	593.742	0.32793	0.0898804	3.64851	0.000263764	0.0011189
YDR306C	1106.09	0.256393	0.0702924	3.64752	0.000264788	0.00112253
YPR169W-A	1243.62	0.278689	0.0764446	3.64563	0.00026674	0.00113008
YPL003W	689.194	0.349784	0.0959623	3.64501	0.00026738	0.00113207
YDR165W	998.448	-0.27953	0.0768756	-3.63613	0.000276763	0.00117041
YIL156W-A	402.472	0.362104	0.0995901	3.63595	0.000276962	0.00117041
YGL166W	1689.5	0.273573	0.0752406	3.63598	0.000276928	0.00117041
YKR066C	3374.41	0.201906	0.0555492	3.63472	0.00027828	0.00117523
YHR200W	1771.61	0.231445	0.0636883	3.63402	0.000279038	0.00117769
YGL156W	917.952	0.299509	0.0824521	3.63252	0.000280666	0.00118306
YJL130C	5215.88	-0.212674	0.0585451	-3.63266	0.000280513	0.00118306
YLR108C	745.522	-0.617674	0.170262	-3.62779	0.000285861	0.0012042
YER163C	1354.82	0.278411	0.0767525	3.62739	0.000286305	0.0012053
YJL053W	1128.55	0.263868	0.0727487	3.62711	0.000286609	0.00120582
YIR032C	607.587	0.388321	0.107072	3.62674	0.000287019	0.00120678
YLR250W	4025.07	0.203161	0.0560338	3.62569	0.000288196	0.00121097
YDR027C	977.479	0.270807	0.0747006	3.62523	0.000288703	0.00121201
YPR112C	774.312	-0.276222	0.0761962	-3.62514	0.000288809	0.00121201
YEL020C-B	887.589	-0.285462	0.0787765	-3.62369	0.00029043	0.00121805
YLR292C	601.709	-0.295825	0.0816638	-3.62247	0.000291799	0.00122302
YGL187C	3990.18	0.245197	0.0677154	3.621	0.000293464	0.00122923
YPR180W	795.446	0.285883	0.0789582	3.62068	0.000293829	0.00122998
YPL053C	1754.6	-0.232927	0.0643591	-3.61918	0.000295536	0.00123635
YBR004C	1894.43	-0.602547	0.166502	-3.61885	0.000295913	0.00123715
YHR092C	2952.86	-0.545648	0.150787	-3.61868	0.000296108	0.00123719
YGL154C	613.512	0.310935	0.08593	3.61847	0.000296352	0.00123743
YDR289C	838.59	0.272427	0.0752914	3.6183	0.000296547	0.00123747
YGL141W	638.63	-0.292182	0.0807632	-3.61776	0.000297161	0.00123926
YPL272C	97.7358	-0.583754	0.161372	-3.61743	0.000297537	0.00124005
YFL042C	1258.68	0.247449	0.0684364	3.61575	0.000299474	0.00124734
YLR387C	1857.49	0.226245	0.0627172	3.60738	0.000309299	0.00128746
YMR068W	292.183	0.387074	0.107357	3.60548	0.000311582	0.00129615
YHL030W-A	610.932	0.299128	0.0829882	3.60447	0.00031279	0.00130036
YLR438C-A	1212.59	-0.240927	0.0668995	-3.60133	0.000316591	0.00131534
YBR171W	1121.71	-0.253304	0.0703627	-3.59997	0.00031825	0.00132141
YJR049C	948.199	0.266587	0.0740599	3.59961	0.00031869	0.00132241
YML060W	136.41	-0.50445	0.140182	-3.59853	0.000320024	0.00132712
YNL130C	938.29	0.26376	0.0733265	3.59707	0.000321828	0.00133377
YAL044C	994.527	0.290053	0.0806448	3.59667	0.000322313	0.00133495
YDL110C	2754.51	0.327899	0.0911738	3.59642	0.000322628	0.00133543
YLR189C	1064.89	0.260054	0.0724137	3.59123	0.000329119	0.00136145
YFL034C-A	1249.38	-0.260401	0.0725443	-3.58955	0.000331254	0.00136943
YPR035W	9271.12	-0.283769	0.0790582	-3.58937	0.000331484	0.00136953
YJR014W	3131.18	0.217738	0.0606991	3.58718	0.000334278	0.00138022
YGR023W	1240.21	-0.265605	0.0740758	-3.58558	0.000336334	0.00138784
YMR001C	295.533	-0.41323	0.115271	-3.58485	0.000337275	0.00139087
YIL140W	408.868	-0.331084	0.0923743	-3.58416	0.00033817	0.00139369
YDL092W	1452.2	-0.246722	0.0688549	-3.58321	0.000339397	0.00139789
YAL044W-A	806.137	0.301246	0.0841038	3.58184	0.000341186	0.00140439
YPR142C	421.552	-0.34755	0.097051	-3.58111	0.000342139	0.00140744
YJR041C	225.63	-0.423095	0.118187	-3.57988	0.000343751	0.0014132
YOL098C	791.996	-0.268441	0.0750106	-3.5787	0.000345306	0.00141871
YNL147W	1107.84	0.249012	0.0696117	3.57717	0.000347339	0.00142619
YDR498C	796.804	0.267332	0.0747433	3.57667	0.000347997	0.00142801
YKL138C-A	410.31	0.362099	0.101246	3.57644	0.000348311	0.00142842
YLL023C	750.648	0.289943	0.0811154	3.57445	0.000350965	0.00143842
YGL071W	440.66	-0.328822	0.0920017	-3.57409	0.000351453	0.00143953
YJL050W	456.991	-0.364397	0.102029	-3.57151	0.000354933	0.00145221
YML111W	372.392	-0.354861	0.0993599	-3.57147	0.000354986	0.00145221
YLR079W	2246.82	0.218746	0.0613296	3.56673	0.000361469	0.00147783
YNL084C	3340.48	0.212749	0.05966	3.56602	0.000362443	0.0014809
YHR060W	954.952	0.264151	0.0741069	3.56447	0.000364597	0.00148879
YOL123W	1697.51	-0.29994	0.0841605	-3.56391	0.000365373	0.00149104
YBR015C	979.722	-0.276335	0.0775813	-3.56188	0.000368206	0.00150168
YPR005C	359.797	-0.35601	0.099975	-3.56099	0.000369462	0.00150589
YER139C	591.378	0.307003	0.0862175	3.5608	0.00036973	0.00150605
YNR034W	604.661	0.298671	0.0839222	3.55891	0.000372399	0.001516
YAR027W	1821.01	0.223348	0.0628037	3.55628	0.000376136	0.00153028
YKL020C	1203.54	0.241619	0.0679486	3.55591	0.00037668	0.00153156
YGL263W	33.4928	-0.754609	0.212232	-3.55559	0.000377126	0.00153221
YKR060W	491.214	-0.314479	0.0884494	-3.55547	0.000377301	0.00153221
YJL076W	782.819	-0.273789	0.0770162	-3.55496	0.000378041	0.00153428
YLR020C	326.407	-0.373908	0.105196	-3.5544	0.000378838	0.00153658
YDR478W	384.462	0.358731	0.100957	3.5533	0.000380424	0.00154207
YHR027C	2574.32	0.209797	0.0590469	3.55305	0.000380788	0.00154261
YKL104C	1946.98	-0.259338	0.0729977	-3.55269	0.000381308	0.00154378
YGL140C	551.731	-0.303357	0.085467	-3.5494	0.000386105	0.00156225
YMR178W	1775.49	0.228693	0.0644502	3.54836	0.00038764	0.00156751
YPL134C	928.248	0.34907	0.0984135	3.54697	0.00038969	0.00157484
YJL189W	29374.3	0.222102	0.0626358	3.54592	0.000391238	0.00157989
YLR227C	376.795	-0.343123	0.0967688	-3.54581	0.000391415	0.00157989
YNL231C	583.759	-0.319419	0.0901338	-3.54383	0.000394359	0.00159081
YBR188C	445.448	0.320215	0.0903668	3.5435	0.000394846	0.00159181
YAL042W	1927.83	-0.220515	0.0622721	-3.54114	0.000398397	0.00160515
YKL062W	1034.35	-0.275776	0.0778916	-3.54051	0.000399349	0.00160802
YPR185W	515.68	-0.320874	0.0906379	-3.54018	0.000399856	0.00160909
YDR266C	520.653	-0.30536	0.0862722	-3.53949	0.000400901	0.00161222
YOR166C	327.141	-0.373037	0.105397	-3.53935	0.000401117	0.00161222
YPL143W	20891.5	-0.191377	0.0540813	-3.53869	0.000402114	0.00161525
YDR203W	423.87	0.333605	0.0942975	3.53779	0.000403486	0.00161978
YNR018W	1164.02	-0.241267	0.0682022	-3.53752	0.0004039	0.00162046
YJL062W-A	648.227	0.298937	0.0845536	3.53547	0.00040705	0.00163212
YLR370C	2081.05	0.209098	0.0591524	3.53491	0.000407916	0.00163461
YBR241C	654.002	0.32747	0.0926459	3.53464	0.000408328	0.00163528
YDR420W	591.552	-0.288591	0.0816877	-3.53286	0.000411094	0.00164536
YML022W	1815.26	-0.225674	0.0639137	-3.53092	0.000414122	0.00165649
YOR191W	895.479	0.262459	0.0743442	3.53032	0.000415054	0.00165922
YPL054W	295.133	0.420154	0.11904	3.52952	0.000416321	0.00166329
YJL131C	488.003	0.311587	0.0883046	3.52854	0.000417851	0.0016684
YDR539W	699.203	0.28446	0.0806431	3.52739	0.000419673	0.00167467
YKL061W	763.309	0.272525	0.0772659	3.5271	0.00042014	0.00167553
YDL025C	1556.11	-0.299655	0.0850549	-3.52308	0.00042657	0.00169916
YML095C	325.074	0.383332	0.108806	3.52307	0.000426577	0.00169916
YNL052W	6363.86	0.279694	0.0794191	3.52175	0.000428713	0.00170665
YEL034C-A	24094.1	-0.189659	0.0538572	-3.52152	0.000429083	0.0017071
YOL085C	2733.76	0.232691	0.0661544	3.51739	0.000435814	0.00173285
YNL217W	1213	-0.261427	0.0743422	-3.51654	0.000437218	0.00173739
YPL142C	20906.6	-0.19024	0.0541337	-3.51426	0.000440977	0.00175129
YJL106W	216.005	-0.458738	0.130543	-3.51407	0.0004413	0.00175152
YGL199C	879.47	0.277044	0.078852	3.51346	0.000442307	0.00175448
YFL029C	705.543	0.281762	0.0802189	3.51241	0.000444055	0.00176036
YFL067W	51.5072	-0.66944	0.190723	-3.51001	0.000448096	0.00177322
YMR161W	677.933	0.282204	0.0803964	3.51016	0.000447831	0.00177322
YMR237W	1472.39	0.22907	0.0652564	3.5103	0.000447603	0.00177322
YOR117W	2408.54	0.209674	0.0597507	3.50914	0.000449559	0.00177795
YLR036C	399.493	-0.340169	0.0969431	-3.50895	0.000449879	0.00177816
YNL247W	1683.57	-0.23704	0.0675586	-3.50866	0.000450371	0.00177905
YFL056C	82.2052	-0.582761	0.166101	-3.50847	0.000450693	0.00177926
YOR207C	1154.47	-0.240459	0.0685661	-3.50697	0.000453233	0.00178823
YHR197W	539.953	-0.298053	0.08511	-3.50197	0.000461825	0.00182105
YML124C	1472.16	-0.224051	0.0640211	-3.49963	0.000465897	0.00183602
YFL007W	1125.07	0.237771	0.0680225	3.49547	0.000473221	0.00186378
YDL057W	533.829	0.303361	0.0867944	3.49517	0.000473757	0.00186479
YPL213W	592.505	0.290181	0.0830743	3.49304	0.000477562	0.00187866
YBL041W	3662.09	0.192439	0.0551658	3.48837	0.000485969	0.0019106
YBR182C	305.451	-0.395395	0.113456	-3.48501	0.00049211	0.00193348
YGR177C	163.654	-0.467806	0.134239	-3.48487	0.000492369	0.00193348
YBR050C	493.786	0.394562	0.11328	3.48307	0.000495694	0.00194424
YDR325W	266.84	-0.38087	0.109349	-3.48307	0.000495692	0.00194424
YBR187W	917.821	-0.25913	0.0744529	-3.48045	0.000500576	0.00196152
YLR412W	930.639	0.266083	0.0764521	3.48039	0.000500689	0.00196152
YKL209C	585.721	-0.374993	0.107786	-3.47906	0.000503177	0.00197011
YIL041W	2853.86	0.199359	0.057335	3.47709	0.00050688	0.00198344
YNR014W	625.866	-0.301545	0.086743	-3.47631	0.000508368	0.0019881
YLR251W	1084.53	0.257122	0.0739831	3.47542	0.000510063	0.00199356
YOR267C	1418.76	-0.225097	0.0647949	-3.47399	0.000512776	0.00200299
YKR088C	996.545	0.258518	0.0744226	3.47365	0.000513421	0.00200433
YNR020C	110.196	-0.538883	0.155208	-3.472	0.000516594	0.00201553
YDR433W	1981.7	0.223769	0.0644822	3.47024	0.000519997	0.00202762
YFL021W	1128.23	0.246268	0.0709806	3.46951	0.000521416	0.00203197
YBL068W-A	267.817	-0.380557	0.110015	-3.45914	0.00054191	0.0021106
YOR030W	317.193	-0.352573	0.101972	-3.45755	0.000545121	0.00212186
YPR188C	993.261	0.250973	0.0726121	3.45635	0.000547538	0.00213003
YMR040W	366.863	0.346977	0.100398	3.45603	0.000548195	0.00213134
YDR531W	788.606	-0.261017	0.0755502	-3.45489	0.000550527	0.00213915
YGR109W-A	277.08	-0.368878	0.106787	-3.45434	0.000551638	0.00214222
YKL096W-A	15524.4	-0.22473	0.0650705	-3.45364	0.000553084	0.00214658
YDL210W	203.432	0.424435	0.12293	3.45266	0.000555079	0.00215302
YOR035C	1665.42	0.222815	0.064537	3.45251	0.000555389	0.00215302
YEL066W	591.291	0.286869	0.0831294	3.45088	0.000558767	0.00216486
YNL131W	2388.89	0.206387	0.0598486	3.44848	0.000563749	0.00218289
YPR081C	689.438	0.284762	0.0825976	3.44758	0.000565633	0.00218891
YIR014W	154.865	0.470482	0.136554	3.44539	0.000570231	0.00220542
YGR195W	768.155	-0.259913	0.0754462	-3.44501	0.000571034	0.00220725
YLR021W	866.336	0.263538	0.0765845	3.44114	0.000579258	0.00223774
YDL035C	764.782	-0.269201	0.0782578	-3.43993	0.000581857	0.00224647
YHR163W	1188.05	-0.244628	0.0711336	-3.439	0.000583877	0.00225297
YDR499W	381.038	0.339454	0.0987921	3.43604	0.000590285	0.00227637
YHR132C	1844.47	0.223599	0.065099	3.43475	0.000593095	0.00228589
YOR113W	1089.34	0.260775	0.0759723	3.4325	0.000598051	0.00230366
YER013W	487.766	0.319255	0.0930405	3.43136	0.000600571	0.00231203
YDR191W	66.3013	-0.607555	0.177298	-3.42674	0.000610881	0.00234922
YDR455C	86.7168	0.553435	0.161506	3.42671	0.000610937	0.00234922
YDR368W	1327.06	0.223884	0.0653573	3.42554	0.000613581	0.00235802
YDR125C	440.703	0.327634	0.0956691	3.42466	0.000615575	0.00236432
YBR273C	1288.17	0.24857	0.0726667	3.42069	0.00062463	0.00239771
YPR166C	790.394	0.268318	0.078447	3.42037	0.000625355	0.00239911
YOR256C	677.272	-0.278199	0.0813955	-3.41786	0.000631145	0.00241993
YJR122W	660.321	0.305865	0.0895633	3.41507	0.000637647	0.00244346
YOR306C	187.052	-0.426599	0.124971	-3.41358	0.000641145	0.00245545
YER118C	525.266	-0.300726	0.0881417	-3.41185	0.000645236	0.00246969
YBR021W	277.654	-0.374632	0.109819	-3.41136	0.000646391	0.0024727
YGL206C	1727.86	0.226713	0.0664786	3.41032	0.00064887	0.00248075
YFR033C	6243.9	0.240679	0.070587	3.40968	0.000650402	0.00248518
YDR199W	159.79	-0.448757	0.131668	-3.40826	0.00065379	0.0024967
YER176W	901.214	0.263386	0.0772878	3.40785	0.00065476	0.00249897
YPL256C	446.618	-0.305479	0.0897227	-3.40471	0.000662353	0.0025265
YJR005W	1333.76	0.228768	0.0672198	3.40328	0.000665832	0.00253792
YNL181W	931.015	0.265511	0.0780188	3.40316	0.000666108	0.00253792
YHL008C	591.227	0.289542	0.0851098	3.40198	0.000668995	0.00254746
YAL033W	838.231	-0.304481	0.0895996	-3.39824	0.000678198	0.00258103
YKR015C	107.857	-0.516239	0.152185	-3.39219	0.000693374	0.00263678
YOL064C	1293.15	-0.227314	0.0670131	-3.39208	0.000693639	0.00263678
YGL216W	239.286	-0.386174	0.113916	-3.39	0.000698927	0.00265536
YOL056W	285.22	-0.35602	0.105083	-3.38799	0.000704075	0.00267187
YPR059C	644.659	0.288689	0.0852087	3.38802	0.000703986	0.00267187
YDR067C	882.722	0.256885	0.0758439	3.38702	0.000706561	0.00267978
YPL262W	2998.52	0.275445	0.0813944	3.38408	0.000714178	0.00270713
YNL105W	118.921	0.488987	0.144557	3.38266	0.000717881	0.00271962
YIL151C	285.12	-0.412701	0.122057	-3.3812	0.000721696	0.00273166
YLR330W	3813.09	0.186859	0.0552678	3.38098	0.000722291	0.00273166
YOR297C	427.902	-0.322773	0.0954643	-3.38108	0.000722009	0.00273166
YPL254W	281.205	-0.376328	0.111323	-3.38052	0.0007235	0.00273468
YNL207W	1015.7	-0.241471	0.0714458	-3.37977	0.000725459	0.00274053
YBR051W	126.033	0.51055	0.151083	3.37928	0.000726769	0.00274392
YLL009C	449.195	0.322959	0.0955928	3.37849	0.000728864	0.00275027
YBL111C	166.582	-0.429774	0.127246	-3.3775	0.00073147	0.00275855
YGL222C	658.242	0.271768	0.0804679	3.37735	0.000731889	0.00275856
YPL069C	181.571	-0.456368	0.135134	-3.37715	0.000732405	0.00275895
YDR432W	5172.46	0.192904	0.0571247	3.37689	0.0007331	0.00276
YBR065C	323.931	0.345584	0.102377	3.37561	0.00073653	0.00277135
YDR018C	491.056	0.307297	0.0910487	3.37508	0.000737934	0.00277507
YDL069C	231.87	-0.391643	0.116056	-3.3746	0.000739241	0.00277732
YJL002C	1902.86	-0.222929	0.0660618	-3.37455	0.000739366	0.00277732
YLR058C	491.72	0.324026	0.0961061	3.37154	0.000747486	0.00280623
YJL162C	286.582	-0.381489	0.113158	-3.3713	0.000748155	0.00280716
YKL188C	765.579	0.279521	0.0829544	3.36958	0.000752836	0.00282314
YGL221C	2130.15	0.221334	0.0658573	3.36081	0.000777136	0.00291262
YML129C	854.947	0.25805	0.076827	3.35885	0.000782685	0.00293177
YPL263C	681.308	-0.302309	0.0900417	-3.35743	0.000786704	0.00294516
YBL088C	650.965	0.289041	0.0861137	3.3565	0.000789352	0.00295176
YOR122C	5501.66	0.194784	0.0580307	3.35656	0.000789191	0.00295176
YOL011W	284.232	-0.352261	0.104959	-3.35618	0.000790257	0.00295349
YLR301W	974.996	0.258914	0.0771655	3.35531	0.000792757	0.00296117
YJL203W	607.659	0.270773	0.0807907	3.35154	0.000803636	0.00300012
YDR410C	293.257	-0.370399	0.110534	-3.351	0.000805217	0.00300434
YGR174C	1693.6	0.244991	0.0731834	3.34763	0.000815058	0.00303935
YOR018W	492.337	-0.317051	0.0947233	-3.34713	0.000816527	0.00304313
YER074W	15941.6	-0.171454	0.0512378	-3.34624	0.000819165	0.00304955
YKL175W	647.752	-0.272869	0.0815445	-3.34626	0.000819105	0.00304955
YGR185C	2127.23	-0.222208	0.0664318	-3.3449	0.000823127	0.00306258
YIL056W	914.826	-0.291521	0.0871729	-3.34417	0.00082528	0.00306888
YER180C	270.06	-0.364244	0.109021	-3.34104	0.000834649	0.00310199
YMR315W	2260.65	-0.230828	0.0691153	-3.33975	0.000838543	0.00311472
YNL057W	364.288	-0.371996	0.111421	-3.33865	0.000841875	0.00312535
YJL020W-A	231.015	0.383741	0.114977	3.33754	0.000845248	0.00313613
YIL160C	426.612	0.730591	0.219009	3.3359	0.000850236	0.00315288
YIL131C	344.951	-0.329566	0.0988197	-3.33502	0.000852922	0.00316108
YHR025W	1529.31	-0.21887	0.0656657	-3.33309	0.000858879	0.00317962
YML120C	4495.46	0.25845	0.0775401	3.33311	0.000858812	0.00317962
YNL272C	787.089	0.251946	0.0757456	3.32621	0.000880347	0.00325728
YPR073C	1676.6	0.220731	0.0663752	3.3255	0.000882602	0.00326382
YDR116C	695.061	0.264584	0.0795717	3.3251	0.000883869	0.00326669
YPR109W	875.574	0.25133	0.0755904	3.3249	0.000884504	0.00326722
YMR272C	1690.63	-0.20937	0.0630544	-3.32047	0.00089865	0.00331599
YNR070W	526.783	0.298365	0.0898567	3.32046	0.000898703	0.00331599
YDL002C	1076.63	0.234367	0.0706204	3.31869	0.000904409	0.0033352
YHR063W-A	872.178	-0.276573	0.0833457	-3.31838	0.000905414	0.00333706
YFR025C	1218.56	0.229449	0.0691632	3.3175	0.000908279	0.00334576
YOR220W	4003.95	0.186325	0.056179	3.31662	0.000911119	0.00335437
YCL007C	1122.83	0.294555	0.0888516	3.31514	0.000915986	0.00337042
YPL239W	1276.77	-0.245471	0.0740952	-3.31291	0.000923315	0.00339551
YOR060C	759.044	0.25693	0.0776307	3.30964	0.00093416	0.0034335
YDR322C-A	2285.36	0.259357	0.0784409	3.3064	0.000945039	0.00347157
YPR137W	268.715	-0.371367	0.11239	-3.30428	0.000952208	0.00349598
YHR076W	922.746	0.242941	0.0735784	3.3018	0.000960671	0.00352511
YBR162W-A	1210.6	-0.261525	0.0792476	-3.30011	0.000966481	0.00354447
YGR182C	2275.43	0.252157	0.0764242	3.29944	0.000968796	0.00355101
YFL013C	1244.52	0.232784	0.0705753	3.29837	0.00097247	0.00356252
YMR308C	1183.27	-0.271594	0.0823762	-3.29699	0.000977255	0.00357807
YHL027W	1380.54	-0.231073	0.0701087	-3.29592	0.000980989	0.00358977
YHR043C	1608.66	0.210905	0.0640067	3.29505	0.000984049	0.00359899
YHR039C-A	4020	0.193714	0.0588442	3.29199	0.000994819	0.00363439
YKL120W	924.276	0.277505	0.0842953	3.29206	0.00099456	0.00363439
YIL098C	928.554	0.258591	0.0785624	3.29153	0.000996438	0.00363831
YDR230W	560.161	0.288032	0.0876064	3.28779	0.00100976	0.00368493
YNL298W	416.287	-0.319779	0.0973094	-3.28621	0.00101545	0.00370368
YDR200C	574.157	-0.269532	0.0820307	-3.28575	0.00101713	0.00370775
YGL097W	761.126	-0.258288	0.0786545	-3.28383	0.00102406	0.003731
YGL087C	1528.14	0.217635	0.0662966	3.28275	0.00102801	0.00374332
YPL169C	749.664	-0.259151	0.0789515	-3.28241	0.00102923	0.00374571
YHR008C	3672.68	0.259057	0.0789369	3.28182	0.00103138	0.00375151
YBR201C-A	635.073	0.276278	0.084194	3.28145	0.00103274	0.00375215
YDR429C	3999.47	-0.217805	0.0663742	-3.28146	0.0010327	0.00375215
YHL015W	73537.4	0.209572	0.0638682	3.28131	0.00103325	0.00375215
YOL028C	261.761	-0.363135	0.110864	-3.27551	0.00105473	0.00382807
YBR170C	818.385	0.25525	0.0779372	3.27508	0.00105633	0.0038318
YDR054C	2114.08	0.198442	0.0606098	3.2741	0.00105999	0.00384296
YNL185C	285.902	-0.354567	0.10831	-3.27364	0.00106171	0.00384712
YCR020W-B	429.236	0.314137	0.0960322	3.27117	0.00107104	0.0038788
YIL023C	857.4	-0.271836	0.0831206	-3.27038	0.00107405	0.00388759
YKL014C	390.894	-0.313349	0.0958263	-3.26997	0.00107558	0.00389104
YDR497C	3898.19	-0.22678	0.0693583	-3.26968	0.00107667	0.00389286
YML078W	1756.82	0.218565	0.0668856	3.26774	0.0010841	0.00391759
YJL198W	617.119	-0.265324	0.081224	-3.26657	0.00108859	0.00393169
YHR209W	1951.71	-0.230926	0.0707059	-3.26601	0.00109076	0.00393738
YML042W	864.83	0.672955	0.206086	3.26541	0.00109306	0.00394355
YMR062C	3916.53	0.19136	0.0586213	3.26434	0.00109718	0.00395628
YBR291C	2672.33	-0.199947	0.061288	-3.26241	0.0011047	0.00398123
YDR257C	852.382	0.249599	0.0765309	3.26141	0.00110858	0.00399304
YMR043W	561.209	-0.285706	0.0876156	-3.2609	0.00111058	0.00399809
YLR459W	273.262	-0.348582	0.106911	-3.26048	0.00111224	0.00400189
YJL011C	132.149	-0.475796	0.145949	-3.26001	0.00111408	0.0040042
YOR128C	576.842	0.283012	0.0868105	3.26011	0.00111368	0.0040042
YOR249C	604.84	0.276192	0.084737	3.2594	0.00111648	0.00401066
YPL178W	2415.61	0.220882	0.0677806	3.25878	0.00111892	0.00401727
YMR117C	418.705	0.336637	0.103357	3.25703	0.00112585	0.00403996
YNL066W	632.197	-0.281976	0.0865907	-3.25642	0.00112825	0.00404639
YKL010C	1261.74	0.219032	0.0672868	3.2552	0.00113311	0.00406164
YER043C	3822.39	0.189906	0.0583838	3.25272	0.00114306	0.00409508
YDR148C	2792.63	0.256019	0.0787171	3.2524	0.00114436	0.00409756
YGL165C	1469.48	0.248447	0.0764064	3.25165	0.00114736	0.00410608
YPR058W	1518.04	0.213074	0.0655381	3.25115	0.00114939	0.00411115
YDR383C	553.73	0.280444	0.0862816	3.25033	0.00115271	0.0041208
YER107W-A	110.095	-0.482182	0.148374	-3.24977	0.00115498	0.00412671
YJL003W	384.035	0.333521	0.102642	3.24938	0.00115656	0.00413014
YGR200C	1124.99	-0.245444	0.0755678	-3.24799	0.00116222	0.00414811
YBR113W	463.423	0.312399	0.0962267	3.24649	0.00116837	0.00416785
YER091C	1317.06	0.25046	0.0771663	3.24571	0.00117156	0.00417699
YEL012W	1602.56	0.263806	0.0813113	3.2444	0.00117699	0.00419408
YKL139W	348.502	-0.320875	0.0989245	-3.24364	0.00118013	0.00420304
YKL174C	554.368	-0.27706	0.0854404	-3.24273	0.0011839	0.0042142
YDL072C	4301.38	0.181821	0.056073	3.24257	0.00118455	0.00421428
YOR253W	944.676	-0.23806	0.0734546	-3.24092	0.00119146	0.00423658
YNL083W	437.955	0.298759	0.0921996	3.24035	0.00119382	0.0042427
YJL142C	404.663	-0.318138	0.0982125	-3.23928	0.00119831	0.00425639
YDR511W	592.502	0.269196	0.0831472	3.23758	0.00120549	0.0042796
YHR097C	5427.2	0.216261	0.0668368	3.23565	0.00121366	0.00430631
YML002W	284.614	-0.357062	0.110412	-3.23391	0.0012211	0.00433042
YAL008W	736.361	0.263044	0.0813585	3.23315	0.00122433	0.00433957
YHR218W	148.116	-0.430342	0.13315	-3.23201	0.00122924	0.00435467
YBL091C-A	602.423	0.269208	0.0833377	3.23032	0.0012365	0.00437803
YLR167W	189777	0.224806	0.0696167	3.22919	0.0012414	0.00439304
YPR063C	1681.64	0.205808	0.0637427	3.22873	0.00124342	0.00439785
YAL059W	929.449	-0.266079	0.0825537	-3.2231	0.00126812	0.00448283
YJR024C	832.43	-0.241912	0.0750893	-3.22166	0.0012745	0.00450301
YKR038C	784.927	-0.248539	0.0771511	-3.22146	0.00127541	0.00450382
YFL012W-A	69.0409	0.569084	0.176786	3.21906	0.00128611	0.00453921
YGR268C	968.642	0.253096	0.0786775	3.21688	0.00129593	0.00457146
YGL139W	426.763	-0.313098	0.0973823	-3.21515	0.00130378	0.00459672
YLR101C	906.602	0.248541	0.0773316	3.21396	0.00130916	0.00461322
YJR076C	1140.91	-0.224354	0.0698456	-3.21214	0.0013175	0.00464016
YGR006W	253.446	0.355011	0.110597	3.20996	0.00132755	0.00467308
YBL054W	499.136	-0.297058	0.0925472	-3.20979	0.0013283	0.00467325
YBL075C	248.543	0.380775	0.118656	3.20908	0.00133162	0.00467912
YER169W	373.39	-0.315304	0.0982567	-3.20898	0.00133207	0.00467912
YJR034W	535.004	0.288671	0.0899529	3.20913	0.00133136	0.00467912
YER188W	56.1318	-0.592655	0.184826	-3.20655	0.00134338	0.00471634
YJR021C	523.865	0.281948	0.0881576	3.19823	0.00138276	0.00485205
YNL100W	2204.93	0.199501	0.0624139	3.19642	0.00139143	0.00487991
YDL146W	571.24	0.276962	0.0866593	3.19598	0.00139356	0.0048848
YKL049C	937.417	0.232858	0.0728796	3.1951	0.00139782	0.00489714
YDR479C	1111.3	0.225612	0.0706333	3.19413	0.00140253	0.00491061
YMR298W	1014.01	0.231158	0.0723724	3.194	0.00140314	0.00491061
YIL024C	166.11	0.41081	0.128626	3.19383	0.00140397	0.00491094
YIL088C	1340.17	0.207496	0.0649759	3.19343	0.00140591	0.00491515
YJL036W	1819.09	0.202951	0.0635776	3.19218	0.00141206	0.00493289
YPL158C	646.264	0.289649	0.0907394	3.19209	0.00141247	0.00493289
YBR010W	18392.2	0.228649	0.0716493	3.19122	0.00141672	0.00494514
YOR304C-A	380.284	0.332814	0.104362	3.18904	0.00142745	0.00498001
YBR163W	343.966	-0.320297	0.100464	-3.18816	0.00143179	0.00499252
YOR123C	2102.63	0.200474	0.062927	3.18582	0.00144345	0.00503053
YFL025C	177.575	-0.401622	0.126146	-3.18379	0.00145361	0.00506331
YKL082C	687.88	-0.276585	0.0868871	-3.18327	0.00145622	0.00506976
YFL018C	4189.46	0.189827	0.0596455	3.18258	0.00145969	0.00507917
YCL028W	1852.63	0.200234	0.0629579	3.18043	0.00147055	0.00511428
YGR283C	787.007	-0.246936	0.0777313	-3.17679	0.00148915	0.00517628
YBL082C	286.198	-0.34831	0.109684	-3.17557	0.00149543	0.00519538
YLR321C	333.972	-0.321412	0.101234	-3.17494	0.00149866	0.00520389
YHR084W	156.693	-0.420649	0.13251	-3.17448	0.00150103	0.00520941
YLR320W	379.307	0.308994	0.0975028	3.16907	0.00152925	0.00530459
YNL301C	8388.4	0.174889	0.0551973	3.16843	0.00153265	0.0053136
YCR072C	75.2532	-0.536178	0.169263	-3.16773	0.00153634	0.00532363
YPL205C	222.323	-0.372321	0.117546	-3.16746	0.00153779	0.00532589
YGL106W	2930.45	0.186865	0.0589999	3.16721	0.00153911	0.00532749
YPR047W	533.464	0.27842	0.0879111	3.16707	0.00153985	0.00532749
YER171W	554.184	-0.292931	0.0925068	-3.16659	0.00154239	0.00533351
YKL016C	4802.55	0.198618	0.0627404	3.16571	0.00154703	0.00534678
YML105C	1943.14	0.198759	0.0627918	3.16536	0.00154893	0.00535055
YNL071W	3692.54	0.194802	0.0615491	3.16499	0.00155088	0.00535451
YNL268W	1394.33	-0.230768	0.0730065	-3.16093	0.00157269	0.00542699
YBR198C	829.31	-0.235631	0.0746254	-3.15751	0.00159121	0.00548719
YPL244C	615.197	-0.255988	0.0810754	-3.15741	0.00159178	0.00548719
YBR132C	1368.04	0.250908	0.0795049	3.15589	0.00160012	0.00551308
YLR261C	797.753	-0.239142	0.0757829	-3.15562	0.00160159	0.00551529
YHR071C-A	73.9155	-0.538348	0.170621	-3.15523	0.00160372	0.00551691
YKR087C	1140.95	0.21827	0.0691742	3.15536	0.00160299	0.00551691
YLR018C	405.11	-0.296862	0.0941623	-3.15266	0.00161788	0.00556276
YCR082W	1956.01	0.215714	0.0684872	3.1497	0.00163439	0.00561664
YBR259W	251.559	-0.354823	0.112673	-3.14915	0.00163747	0.00562433
YNR045W	823.562	0.251032	0.0797466	3.14787	0.00164466	0.0056461
YNL125C	539.936	-0.301279	0.0957342	-3.14704	0.00164932	0.00565917
YLL031C	347.481	-0.307934	0.0978783	-3.14609	0.00165468	0.00567463
YLR044C	67631.9	-0.171073	0.0543861	-3.14552	0.00165792	0.00568282
YOR252W	1207.69	-0.215903	0.0686599	-3.14453	0.00166356	0.00569924
YBR031W	31271.5	0.15775	0.0501868	3.14325	0.00167084	0.00571829
YOR045W	756.781	0.261972	0.0833423	3.14332	0.00167042	0.00571829
YDR056C	2432.69	0.202977	0.0646501	3.13962	0.00169168	0.00578366
YJR144W	674.574	-0.25502	0.0812248	-3.13968	0.00169132	0.00578366
YLR285W	904.593	-0.23826	0.0759047	-3.13893	0.00169565	0.00579427
YOR124C	1383.36	0.203495	0.064852	3.13784	0.00170197	0.00581287
YJR060W	903.876	0.241045	0.0768363	3.13712	0.00170616	0.0058242
YPL183C	417.373	-0.308429	0.0983286	-3.13672	0.00170849	0.00582918
YDR245W	1182.67	-0.221059	0.0705069	-3.13528	0.00171692	0.00585493
YER180C-A	122.501	0.480766	0.153364	3.13481	0.00171968	0.00586134
YKL166C	221.023	-0.38641	0.123279	-3.13443	0.00172186	0.00586576
YJL115W	260.387	-0.351552	0.112231	-3.13239	0.00173392	0.00590383
YOR286W	1397.82	0.202711	0.0647537	3.1305	0.00174512	0.00593892
YGR270C-A	118.202	0.465087	0.148616	3.12945	0.00175136	0.00595472
YHL007C	698.434	-0.248206	0.0793139	-3.12942	0.00175155	0.00595472
YBR296C	574.032	0.273049	0.0873558	3.12572	0.00177372	0.00602703
YKL204W	1035.43	0.218835	0.0700801	3.12264	0.00179235	0.00608721
YBR153W	238.129	-0.353932	0.113433	-3.12019	0.00180733	0.00613498
YER114C	529.338	-0.271413	0.0870404	-3.11824	0.00181935	0.00617263
YDR190C	1588.29	-0.249028	0.0798726	-3.11782	0.00182195	0.0061783
YAR014C	694.449	-0.249245	0.0799504	-3.11749	0.00182399	0.00618208
YER088C-A	204.423	-0.378095	0.121306	-3.11686	0.00182791	0.00619221
YMR257C	206.027	-0.387238	0.124268	-3.11614	0.00183233	0.00620404
YDL195W	1699.54	-0.199235	0.0639534	-3.11531	0.00183749	0.00621701
YGL146C	277.009	0.343243	0.110182	3.11523	0.00183803	0.00621701
YDR312W	357.9	-0.324551	0.104262	-3.11285	0.0018529	0.00626411
YOR118W	637.653	-0.257894	0.0829012	-3.11086	0.00186543	0.00630329
YOL059W	3085.43	0.189831	0.0610468	3.10961	0.00187337	0.00632691
YMR304C-A	768.52	-0.247094	0.0794743	-3.10911	0.00187653	0.00633435
YDR046C	1536.3	-0.213477	0.0686907	-3.1078	0.00188485	0.00635921
YKL005C	524.089	0.26213	0.0843812	3.1065	0.00189318	0.00638407
YOL107W	218.234	-0.365351	0.117686	-3.10447	0.00190622	0.00642479
YCR041W	81.9186	0.509525	0.164383	3.09962	0.00193766	0.00652747
YNL039W	832.177	0.235333	0.0759377	3.09903	0.00194153	0.0065372
YDR348C	1145.48	-0.215614	0.0695902	-3.09834	0.00194606	0.00654913
YOR025W	145.868	-0.428246	0.138246	-3.09771	0.00195024	0.00655991
YKL053C-A	453.086	0.311428	0.100628	3.09486	0.00196908	0.00661991
YCL048W	186.504	0.415375	0.134247	3.09411	0.00197402	0.00663317
YLR230W	1677.53	-0.217581	0.0703374	-3.09339	0.00197885	0.00664605
YPL097W	580.576	0.266896	0.0862993	3.09268	0.00198361	0.0066587
YHR183W	3545.92	-0.218568	0.0706795	-3.09238	0.00198558	0.00666195
YLR039C	465.296	-0.288943	0.0934945	-3.09048	0.00199834	0.00670139
YGR037C	1676.62	0.21554	0.0697553	3.08994	0.00200194	0.00670672
YMR251W	129.226	0.452189	0.146336	3.09008	0.00200104	0.00670672
YDR170W-A	723.932	0.261118	0.084532	3.08898	0.00200846	0.00672179
YGL058W	440.101	-0.281267	0.0910535	-3.08903	0.00200812	0.00672179
YNL097C	786.136	0.234635	0.0759691	3.08856	0.00201129	0.00672788
YGL107C	534.008	0.261639	0.0848125	3.08491	0.00203611	0.00680749
YER127W	241.162	-0.362256	0.117597	-3.08047	0.00206674	0.00690641
YIL029C	526.59	0.273877	0.0889464	3.07912	0.00207612	0.00693199
YOL119C	1594.53	-0.253354	0.0822825	-3.07907	0.00207647	0.00693199
YBR122C	1376.49	0.210431	0.0683603	3.07826	0.0020821	0.0069473
YDR457W	1408.13	0.220825	0.0717602	3.07726	0.00208914	0.00696469
YGL057C	258.275	-0.343372	0.111585	-3.07722	0.00208941	0.00696469
YIL077C	1278.94	0.219209	0.0712625	3.07608	0.00209744	0.00698797
[truncated: 4,661 more rows]

## Sheet: scFv645_vs_DMSO
	baseMean	log2FoldChange	lfcSE	stat	pvalue	padj
YGR142W	3068.29	2.16257	0.169868	12.7309	3.98113e-37	2.54752e-33
YPL240C	4351.94	1.38851	0.11022	12.5976	2.17649e-36	6.96369e-33
YNR064C	257.038	-1.74651	0.146354	-11.9334	7.92545e-33	1.6905e-29
YLR194C	5507.58	-0.940373	0.0818819	-11.4845	1.5784e-30	2.52505e-27
YHR030C	1983.27	-0.897156	0.0813299	-11.0311	2.70608e-28	3.46324e-25
YFL061W	411.873	-1.36184	0.127713	-10.6633	1.51059e-26	1.61105e-23
YAL004W	2027.89	1.07364	0.101396	10.5887	3.36398e-26	3.07516e-23
YNL335W	442.904	-1.3501	0.1281	-10.5394	5.68398e-26	4.54647e-23
YHR071W	4190.59	-0.815673	0.0782046	-10.43	1.80917e-25	1.28632e-22
YAL005C	7499.53	1.08822	0.105207	10.3436	4.47224e-25	2.86179e-22
YDR055W	2184.13	-0.893998	0.0870736	-10.2671	9.90931e-25	5.76452e-22
YPL092W	470.161	-1.21834	0.121523	-10.0256	1.17676e-23	6.2751e-21
YBR101C	3182.86	0.844662	0.0844449	10.0025	1.48561e-23	7.31265e-21
YBR072W	656.668	1.1054	0.113074	9.77587	1.42917e-22	6.53234e-20
YLL024C	5803.23	0.980378	0.102353	9.57842	9.85424e-22	4.20382e-19
YOR027W	3653.4	0.864364	0.0913318	9.46399	2.96401e-21	1.18542e-18
YJL034W	3460.6	0.798527	0.0849336	9.40178	5.36495e-21	2.01943e-18
YBR068C	2877.8	-0.745928	0.0793906	-9.39566	5.68595e-21	2.02135e-18
YER043C	4814.76	0.736252	0.0786436	9.36189	7.83258e-21	2.63793e-18
YCR010C	1196.97	1.18782	0.127478	9.31786	1.18705e-20	3.79797e-18
YKR097W	2086.62	-1.14235	0.123044	-9.28405	1.63152e-20	4.97147e-18
YMR316C-A	446.776	-0.988697	0.109174	-9.05615	1.35137e-19	3.93063e-17
YER081W	958.316	-0.806014	0.0891949	-9.03655	1.61691e-19	4.49854e-17
YHR209W	1668.33	-0.732022	0.0834745	-8.76941	1.79609e-18	4.78883e-16
YER053C	2037.03	-0.825203	0.0943627	-8.74502	2.22976e-18	5.7073e-16
YLR355C	1608.5	-0.745438	0.086164	-8.65139	5.08737e-18	1.25208e-15
YBL002W	6298.95	0.626993	0.0726343	8.63219	6.01863e-18	1.42642e-15
YKL043W	798.953	-0.870306	0.101516	-8.57306	1.00772e-17	2.303e-15
YML087C	280.63	-1.03366	0.12079	-8.55745	1.15391e-17	2.54616e-15
YAL053W	1963.38	-0.695492	0.0814785	-8.5359	1.39069e-17	2.96634e-15
YPL163C	1605.53	0.699669	0.0829697	8.43283	3.37414e-17	6.96487e-15
YJL171C	2909.53	-0.690312	0.081908	-8.42789	3.51954e-17	7.03797e-15
YNL077W	1141.31	0.767509	0.0911886	8.41671	3.87191e-17	7.50798e-15
YOR360C	613.657	-0.797743	0.0957898	-8.32806	8.21789e-17	1.54666e-14
YOL032W	1318.78	0.677219	0.0820836	8.25035	1.57929e-16	2.88739e-14
YJL107C	854.809	-0.755027	0.0923596	-8.17486	2.9621e-16	5.26514e-14
YLR217W	815.451	0.729108	0.0892668	8.16774	3.14217e-16	5.43426e-14
YLR300W	1905.94	-0.719051	0.0886006	-8.11565	4.83208e-16	8.13696e-14
YDL070W	2253.38	-0.724212	0.0902747	-8.02231	1.03776e-15	1.66016e-13
YKR091W	1278.45	-0.680273	0.0847683	-8.02509	1.01452e-15	1.66016e-13
YOR028C	1322.03	-0.769168	0.0972973	-7.90534	2.67195e-15	4.17019e-13
YJL108C	422.298	-0.790081	0.100877	-7.83215	4.79603e-15	7.3071e-13
YDR043C	897.305	-0.738031	0.0945549	-7.80532	5.93531e-15	8.83256e-13
YCR021C	3649.74	0.890583	0.114616	7.77013	7.84055e-15	1.14027e-12
YOR137C	287.804	-0.857152	0.111287	-7.70215	1.33795e-14	1.90257e-12
YDR033W	6148.12	-0.738924	0.0962161	-7.67984	1.59288e-14	2.21583e-12
YHR094C	1849.79	-0.700584	0.0926761	-7.55949	4.04656e-14	5.50934e-12
YDR149C	390.703	0.78441	0.103816	7.55576	4.16421e-14	5.55142e-12
YJL144W	1346.31	0.717547	0.0953505	7.52536	5.25742e-14	6.86576e-12
YBR054W	3206.98	-0.879634	0.117014	-7.51733	5.59066e-14	7.01464e-12
YNL180C	1474.95	-0.643395	0.0855817	-7.51791	5.56583e-14	7.01464e-12
YIL117C	1821.52	-0.63363	0.0845051	-7.49813	6.47348e-14	7.96612e-12
YMR122W-A	4821.15	-0.653004	0.087298	-7.48017	7.42249e-14	8.96161e-12
YCR024C-B	1333.74	-0.687793	0.0921565	-7.46332	8.437e-14	9.90576e-12
YLR216C	3739.55	0.600188	0.0804313	7.46212	8.5141e-14	9.90576e-12
YEL026W	616.899	-0.741946	0.100123	-7.41038	1.25941e-13	1.4391e-11
YPR103W	3005.45	0.553514	0.0751058	7.3698	1.70888e-13	1.91845e-11
YDR299W	401.786	0.830337	0.114139	7.27479	3.46951e-13	3.82783e-11
YGR211W	1021.53	0.721834	0.100835	7.15855	8.15375e-13	8.84336e-11
YLR120C	1626.92	-0.680463	0.095237	-7.14494	9.00362e-13	9.60236e-11
YPL231W	4220.23	0.558596	0.0784101	7.12403	1.04817e-12	1.09955e-10
YBR004C	1890.9	-0.661576	0.0930228	-7.11198	1.14393e-12	1.1619e-10
YMR186W	12883.5	0.627905	0.0882834	7.11238	1.14055e-12	1.1619e-10
YPR065W	1635.3	-0.634041	0.0895332	-7.08163	1.42465e-12	1.42443e-10
YLR052W	673.071	-0.671831	0.0949197	-7.07788	1.46372e-12	1.44098e-10
YCR024C-A	843.026	-0.704309	0.0998285	-7.05519	1.72365e-12	1.67116e-10
YBR078W	7577.93	-0.58802	0.0837759	-7.01897	2.23511e-12	2.1347e-10
YMR058W	732.76	-0.636987	0.0908757	-7.00943	2.39287e-12	2.25176e-10
YOL085W-A	3679.34	0.594338	0.0848628	7.00352	2.49617e-12	2.31493e-10
YNL213C	478.355	-0.706169	0.101141	-6.98204	2.90924e-12	2.65946e-10
YER073W	833.404	-0.665689	0.0954892	-6.97135	3.13908e-12	2.80899e-10
YOR303W	3313.53	-0.567206	0.0813737	-6.97039	3.16061e-12	2.80899e-10
YLR121C	655.894	-0.643735	0.0926407	-6.94872	3.6861e-12	3.23114e-10
YIL160C	416.434	0.922695	0.133467	6.91331	4.73478e-12	4.0943e-10
YLR259C	4499.86	0.664037	0.0965047	6.88088	5.94835e-12	5.07513e-10
YER103W	1014.21	0.740709	0.107909	6.86423	6.68531e-12	5.62885e-10
YCL064C	115.379	0.977383	0.142558	6.85605	7.0791e-12	5.88301e-10
YLR286C	8508.13	0.739591	0.108081	6.84293	7.75898e-12	6.36535e-10
YKL161C	618.812	-0.636468	0.093105	-6.83603	8.1419e-12	6.59494e-10
YOR226C	149.571	-0.9136	0.133821	-6.82701	8.6704e-12	6.93524e-10
YDR085C	1507.16	-0.55377	0.0813535	-6.80696	9.96817e-12	7.87486e-10
YDL048C	728.684	-0.692997	0.102498	-6.76109	1.36959e-11	1.06878e-09
YNL142W	1263.39	0.649362	0.0962016	6.75001	1.4783e-11	1.13972e-09
YOR292C	522.345	-0.66435	0.0989783	-6.71208	1.91869e-11	1.46163e-09
YLR286W-A	630.678	0.853603	0.127942	6.6718	2.52683e-11	1.90226e-09
YOR079C	187.166	-0.892802	0.134589	-6.63353	3.27746e-11	2.43866e-09
YDR171W	6919.95	0.637257	0.0961502	6.62772	3.40912e-11	2.50747e-09
YIL119C	159.484	-0.848971	0.128693	-6.59689	4.19885e-11	3.05323e-09
YNL244C	4631.74	-0.69954	0.106428	-6.57289	4.93476e-11	3.54804e-09
YOR134W	677.272	-0.643132	0.098443	-6.53303	6.44515e-11	4.5825e-09
YGR063C	607.812	-0.797849	0.122584	-6.50857	7.5872e-11	5.33522e-09
YBR169C	2159	0.633039	0.0975959	6.48632	8.79576e-11	6.11784e-09
YCR013C	20055.1	0.547612	0.0844813	6.48205	9.04873e-11	6.22611e-09
YBR069C	460.409	-0.66363	0.102415	-6.47981	9.18379e-11	6.25181e-09
YJR109C	3343.23	-0.554717	0.0857652	-6.46785	9.94074e-11	6.69587e-09
YJL122W	452.507	-0.727675	0.112986	-6.44042	1.19147e-10	7.94188e-09
YML131W	911.751	-0.685364	0.106443	-6.43878	1.20441e-10	7.94539e-09
YOR294W	519.931	-0.665521	0.103692	-6.41825	1.37846e-10	9.0008e-09
YPL250C	1877.29	0.541393	0.0847723	6.38644	1.69792e-10	1.09747e-08
YKR013W	2445.19	0.518459	0.0816664	6.3485	2.1743e-10	1.39134e-08
YOR355W	869.755	-0.649738	0.102435	-6.34291	2.2547e-10	1.42849e-08
YMR049C	1119.58	0.602229	0.0950458	6.3362	2.35495e-10	1.47739e-08
YLR404W	226.643	-0.796788	0.125988	-6.3243	2.54385e-10	1.5662e-08
YNL007C	2530.76	0.574305	0.0908106	6.3242	2.54548e-10	1.5662e-08
YOL147C	796.487	0.561097	0.0893578	6.27921	3.40287e-10	2.07381e-08
YBL097W	377.702	0.706882	0.113119	6.24902	4.13026e-10	2.49335e-08
YOR302W	288.316	-0.706837	0.113763	-6.21323	5.19058e-10	3.10416e-08
YPL089C	1466.35	-0.567165	0.0916669	-6.18724	6.12278e-10	3.62775e-08
YDL014W	2159.16	-0.546036	0.0882785	-6.18538	6.1952e-10	3.63698e-08
YOL019W	828.358	-0.545096	0.0882371	-6.17763	6.50726e-10	3.78545e-08
YGR064W	344.166	-0.786443	0.127389	-6.17354	6.67786e-10	3.8497e-08
YLR301W	1129.65	0.596715	0.0967506	6.16756	6.93516e-10	3.96233e-08
YIL057C	1184.07	0.778066	0.126581	6.14678	7.90714e-10	4.47768e-08
YMR119W	590.495	-0.579007	0.0944999	-6.12706	8.95169e-10	5.02472e-08
YNL192W	5543.89	-0.568542	0.0935022	-6.08052	1.19795e-09	6.66583e-08
YKL109W	3653.62	-0.545467	0.0897386	-6.0784	1.21389e-09	6.69625e-08
YBR177C	3249.53	0.500854	0.0826567	6.05944	1.36593e-09	7.47058e-08
YDR524C	417.535	-0.620884	0.102562	-6.05372	1.41539e-09	7.67547e-08
YNL312W	951.64	0.516999	0.085692	6.03323	1.60717e-09	8.64225e-08
YGL036W	1022.4	-0.518033	0.0860378	-6.02099	1.73355e-09	9.24415e-08
YMR238W	1852.97	-0.507573	0.0853408	-5.94761	2.72091e-09	1.42714e-07
YNL009W	486.859	0.604494	0.101614	5.94894	2.6988e-09	1.42714e-07
YCR097W	1219.88	-0.553547	0.0939259	-5.89344	3.78234e-09	1.96774e-07
YKR030W	634.538	-0.572146	0.0975102	-5.86755	4.4228e-09	2.28238e-07
YBL043W	729.117	-1.02652	0.175437	-5.85121	4.88017e-09	2.49826e-07
YBR034C	305.316	-0.684115	0.116993	-5.84747	4.99098e-09	2.53471e-07
YLR346C	74.5783	-0.967373	0.165648	-5.83994	5.22197e-09	2.63113e-07
YPR183W	1988.86	0.511097	0.0875968	5.83466	5.39015e-09	2.69466e-07
YLR168C	641.425	-0.68474	0.117812	-5.81216	6.1671e-09	3.04215e-07
YOR007C	5282.94	0.422291	0.072661	5.8118	6.18034e-09	3.04215e-07
YER145C	581.105	-0.544951	0.0943469	-5.77604	7.64794e-09	3.73581e-07
YDR545W	551.004	-0.572896	0.0993226	-5.76804	8.02007e-09	3.82988e-07
YLR467W	551.004	-0.572896	0.0993226	-5.76804	8.02007e-09	3.82988e-07
YOR396W	551.004	-0.572896	0.0993226	-5.76804	8.02007e-09	3.82988e-07
YOR095C	1278.81	-0.625435	0.108606	-5.75877	8.47293e-09	4.01617e-07
YLL026W	10543.3	0.593677	0.103299	5.74715	9.0759e-09	4.27034e-07
YHR174W	48722.7	0.445997	0.0776943	5.7404	9.4452e-09	4.41167e-07
YPR016C	1544.9	-0.515974	0.0899288	-5.73758	9.60394e-09	4.45331e-07
YNL036W	10491	-0.550145	0.0961446	-5.72205	1.05245e-08	4.84507e-07
YMR010W	379.534	-0.578341	0.101739	-5.68458	1.31131e-08	5.99363e-07
YDR258C	3119.19	0.500413	0.0885799	5.64928	1.61117e-08	7.31199e-07
YCR012W	48894.8	0.471819	0.084032	5.61476	1.96835e-08	8.87007e-07
YPL050C	683.882	-0.519277	0.0927646	-5.59779	2.171e-08	9.71484e-07
YLR466W	443.943	-0.582009	0.104333	-5.57836	2.42796e-08	1.07893e-06
YDR156W	395.401	-0.669733	0.120277	-5.56825	2.57305e-08	1.13552e-06
YBR208C	991.848	0.561815	0.101383	5.54149	2.99915e-08	1.30897e-06
YDL198C	1837.82	-0.455935	0.0822835	-5.54103	3.00701e-08	1.30897e-06
YDR351W	543.101	-0.544549	0.0984426	-5.53164	3.17244e-08	1.37165e-06
YBR298C	743.419	-0.595714	0.107936	-5.51913	3.40681e-08	1.4631e-06
YDL117W	396.357	-0.604926	0.109707	-5.51403	3.50713e-08	1.49614e-06
YGL175C	110.404	0.777583	0.141938	5.47833	4.2936e-08	1.81952e-06
YGR044C	1534.91	-0.430615	0.0790318	-5.44863	5.07591e-08	2.13689e-06
YKL182W	2398.53	0.456005	0.0839033	5.43489	5.48308e-08	2.29322e-06
YDR214W	1958.33	0.442521	0.0814863	5.43062	5.61582e-08	2.33348e-06
YGR189C	3264.24	-0.47788	0.0881234	-5.42285	5.86575e-08	2.42161e-06
YML054C	2900.92	0.640743	0.118646	5.40044	6.64771e-08	2.72684e-06
YBR011C	11317.4	0.434553	0.0805128	5.39731	6.76474e-08	2.75717e-06
YHR092C	2934.39	-0.575119	0.106749	-5.38757	7.14166e-08	2.89237e-06
YDR024W	74.625	-0.846892	0.158404	-5.3464	8.97188e-08	3.61076e-06
YLR377C	442.335	-0.665399	0.124624	-5.33926	9.33285e-08	3.73256e-06
YDR077W	32044.2	-0.479612	0.0900468	-5.32625	1.00259e-07	3.97547e-06
YIL162W	2220.28	0.568873	0.10682	5.32556	1.00645e-07	3.97547e-06
YDL205C	444.441	-0.57722	0.108447	-5.32259	1.02301e-07	4.01609e-06
YJL101C	961.595	-0.571719	0.10751	-5.31783	1.05011e-07	4.09734e-06
YNL096C	4324.77	-0.486684	0.0915961	-5.31337	1.07615e-07	4.17351e-06
YDR113C	627.908	0.501326	0.0948251	5.28685	1.24441e-07	4.79697e-06
YLL034C	239.938	0.605573	0.11502	5.26492	1.40248e-07	5.34194e-06
YPL081W	2164.35	-0.444994	0.0845091	-5.26563	1.39706e-07	5.34194e-06
YLL053C	285.468	-0.604193	0.114854	-5.26055	1.43626e-07	5.43825e-06
YMR199W	264.565	-0.588131	0.111922	-5.25483	1.48159e-07	5.57688e-06
YNR065C	365.113	-0.554109	0.105649	-5.24482	1.56431e-07	5.85382e-06
YMR141W-A	207.854	0.682754	0.130337	5.23839	1.61985e-07	6.02641e-06
YOR259C	3285.63	0.452044	0.0864063	5.23161	1.6804e-07	6.21554e-06
YOR043W	1076.59	-0.475855	0.0910492	-5.22634	1.72894e-07	6.35833e-06
YBR296C	674.666	0.613434	0.1174	5.22516	1.74004e-07	6.36258e-06
YKL087C	387.405	-0.577121	0.110588	-5.21864	1.80241e-07	6.55319e-06
YOR208W	999.86	-0.47924	0.0919722	-5.2107	1.88129e-07	6.80135e-06
YBR244W	872.842	-0.584205	0.11228	-5.20309	1.95998e-07	7.04603e-06
YLR149C-A	56.3565	-0.875333	0.168688	-5.18906	2.11355e-07	7.55563e-06
YER174C	763.208	-0.503926	0.09733	-5.17749	2.24886e-07	7.99468e-06
YHR050W-A	82.8166	-0.795169	0.154185	-5.15726	2.50592e-07	8.81063e-06
YHR128W	1038.71	-0.56509	0.109569	-5.15737	2.50439e-07	8.81063e-06
YIL026C	767.082	0.491506	0.0953571	5.15437	2.54487e-07	8.8987e-06
YGL255W	1998.41	-0.535844	0.104115	-5.14667	2.65146e-07	9.17118e-06
YPL208W	446.978	0.523256	0.101659	5.14716	2.64458e-07	9.17118e-06
YKR061W	574.383	-0.518432	0.100901	-5.13805	2.77605e-07	9.55052e-06
YLR186W	637.568	-0.558424	0.108882	-5.12872	2.91712e-07	9.98002e-06
YMR251W	150.547	0.722687	0.140936	5.12776	2.93209e-07	9.98002e-06
YBL032W	972.48	-0.456131	0.089151	-5.11639	3.11442e-07	1.05445e-05
YBR158W	671.306	-0.506985	0.099124	-5.11465	3.14315e-07	1.05858e-05
YOL086W-A	1164.69	-0.481113	0.0946059	-5.08545	3.66759e-07	1.22874e-05
YPL106C	9212.32	0.434406	0.0854748	5.08227	3.72957e-07	1.243e-05
YGL167C	977.93	-0.461094	0.0909324	-5.07073	3.96288e-07	1.31391e-05
YNR010W	373.06	0.523131	0.103285	5.06495	4.08513e-07	1.34746e-05
YDR297W	1119.33	-0.433877	0.0860951	-5.03951	4.66729e-07	1.53159e-05
YGR055W	638.713	-0.466467	0.0928023	-5.02646	4.99619e-07	1.63115e-05
YBL020W	651.402	-0.495731	0.0988846	-5.01323	5.35231e-07	1.72977e-05
YKL145W	3255.67	0.406201	0.0810213	5.01351	5.3446e-07	1.72977e-05
YPL219W	571.826	0.477593	0.0953876	5.00686	5.53238e-07	1.77898e-05
YNL102W	337.95	0.544259	0.108749	5.00471	5.59469e-07	1.79002e-05
YLR108C	752.927	-0.608417	0.121644	-5.00162	5.68493e-07	1.80984e-05
YOL064C	1207.13	-0.420838	0.0842417	-4.99561	5.8651e-07	1.85796e-05
YBL091C	3027.41	0.396334	0.0793714	4.99342	5.93207e-07	1.86992e-05
YDR462W	556.685	0.474061	0.0951821	4.98057	6.33959e-07	1.98858e-05
YER026C	3826.99	0.388722	0.0785554	4.94838	7.4834e-07	2.32855e-05
YPL067C	556.989	-0.550188	0.111193	-4.94805	7.49618e-07	2.32855e-05
YGR097W	1305.12	-0.444733	0.0901537	-4.93305	8.09535e-07	2.50252e-05
YOL119C	1476.1	-0.469658	0.0953483	-4.92571	8.40545e-07	2.58589e-05
YDR416W	669.314	0.443367	0.0900506	4.92354	8.49935e-07	2.60226e-05
YGR148C	14193.8	-0.388375	0.0790356	-4.91393	8.92698e-07	2.71106e-05
YGR285C	7528.58	0.389949	0.0793603	4.91365	8.93943e-07	2.71106e-05
YML016C	861.125	-0.440537	0.0897102	-4.91067	9.07664e-07	2.73969e-05
YPL052W	876.709	-0.518503	0.105619	-4.90917	9.14635e-07	2.74777e-05
YIL122W	325.422	-0.545932	0.111247	-4.90739	9.22976e-07	2.75987e-05
YDL037C	1040.64	0.505959	0.103264	4.89965	9.60093e-07	2.85751e-05
YLL038C	411.295	0.493479	0.100846	4.89339	9.91147e-07	2.93627e-05
YMR315W	2124.72	-0.4047	0.0827584	-4.89014	1.00765e-06	2.97141e-05
YBR147W	1873.53	-0.400862	0.0821682	-4.87855	1.06869e-06	3.13695e-05
YOR044W	239.221	-0.600747	0.123328	-4.87112	1.10966e-06	3.24235e-05
YBR085C-A	4762.27	-0.367525	0.075503	-4.86769	1.12913e-06	3.28423e-05
YGR192C	148789	0.336407	0.0691688	4.86357	1.1529e-06	3.33819e-05
YER124C	2434.49	0.41062	0.0844769	4.86074	1.16948e-06	3.37093e-05
YAR035W	639.03	0.571591	0.117683	4.85704	1.19156e-06	3.41918e-05
YGL013C	711.849	0.464126	0.095609	4.85442	1.20742e-06	3.44922e-05
YGL212W	331.634	0.533819	0.11005	4.8507	1.2303e-06	3.48556e-05
YKL096W	2306.67	-0.431863	0.0890333	-4.85058	1.23103e-06	3.48556e-05
YOR248W	3714.72	0.368778	0.0760956	4.84625	1.25816e-06	3.54669e-05
YOL058W	4940.7	-0.403088	0.0832612	-4.84125	1.29025e-06	3.62119e-05
YGR115C	804.989	0.483052	0.0999973	4.83065	1.36089e-06	3.80276e-05
YGL037C	7993.91	-0.364269	0.0755672	-4.82046	1.43228e-06	3.98484e-05
YKL190W	919.373	-0.422357	0.0878459	-4.80793	1.52504e-06	4.22455e-05
YJL088W	1156.14	-0.431233	0.0898468	-4.79965	1.58942e-06	4.38391e-05
YML037C	113.781	0.694323	0.144805	4.79489	1.62763e-06	4.47003e-05
YPR150W	1151.89	0.507837	0.106072	4.78767	1.68727e-06	4.61405e-05
YGL120C	996.536	0.450756	0.0942945	4.7803	1.75031e-06	4.76606e-05
YOR225W	67.0138	-0.808684	0.169276	-4.77732	1.77648e-06	4.81681e-05
YHR136C	240.596	0.560395	0.117879	4.75399	1.99436e-06	5.38478e-05
YDR499W	406.385	0.48412	0.101861	4.75277	2.00647e-06	5.39472e-05
YDR072C	757.136	-0.422745	0.0889665	-4.75172	2.01689e-06	5.40002e-05
YOL099C	183.64	-0.594612	0.125452	-4.73977	2.13964e-06	5.70481e-05
YAR007C	856.866	0.414833	0.0876903	4.73066	2.23795e-06	5.94218e-05
YER190W	509.447	-0.478059	0.101094	-4.72887	2.25768e-06	5.96978e-05
YJL133C-A	3829.27	0.403199	0.0853737	4.72276	2.32666e-06	6.12686e-05
YCL037C	48.7564	0.817681	0.173189	4.72133	2.34313e-06	6.14494e-05
YBR183W	2086.71	-0.425215	0.0903653	-4.70551	2.53228e-06	6.6139e-05
YML042W	756.873	0.564768	0.120233	4.69728	2.63652e-06	6.85817e-05
YOL159C	437.067	-0.489516	0.104615	-4.6792	2.87995e-06	7.46106e-05
YOR083W	249.58	0.540356	0.115744	4.66855	3.03327e-06	7.82657e-05
YCL010C	582.793	0.439779	0.094223	4.66742	3.05e-06	7.83814e-05
YOR104W	539.896	-0.46072	0.0989609	-4.65557	3.23079e-06	8.26953e-05
YPR159W	1189.3	-0.407931	0.087971	-4.6371	3.53325e-06	9.00768e-05
YLR414C	5002.96	-0.379228	0.0820536	-4.6217	3.80603e-06	9.6646e-05
YGL021W	387.719	-0.469339	0.101854	-4.60794	4.0668e-06	0.000102859
YOL045W	593.621	-0.439598	0.0955583	-4.60032	4.2185e-06	0.000106276
YLR063W	118.744	0.638433	0.138937	4.59514	4.32468e-06	0.000108524
YEL059W	58.5425	-0.771474	0.167992	-4.59234	4.38305e-06	0.000109559
YBR247C	565.893	0.466907	0.10171	4.59056	4.42057e-06	0.000110067
YDR151C	1171.15	0.391411	0.0853986	4.58334	4.57597e-06	0.000113495
YBR127C	6262.51	0.368666	0.0804722	4.58128	4.62138e-06	0.000114178
YHR066W	397.609	0.49914	0.10904	4.5776	4.70332e-06	0.000115756
YJL192C	1808.35	-0.496751	0.108538	-4.57672	4.72312e-06	0.000115798
YBR172C	667.914	-0.425861	0.0932653	-4.56613	4.96809e-06	0.000121339
YER067C-A	19546.6	-0.378523	0.0830073	-4.56012	5.11255e-06	0.000124393
YPL172C	169.439	-0.609274	0.13394	-4.54885	5.39397e-06	0.000130241
YPL156C	1234.94	-0.381656	0.0839161	-4.54807	5.41399e-06	0.000130241
YPR204W	418.448	-0.471001	0.103558	-4.54818	5.41106e-06	0.000130241
YCR083W	759.767	-0.508214	0.111847	-4.54384	5.52397e-06	0.000132389
YER067W	25124.7	-0.372196	0.0819759	-4.54031	5.61722e-06	0.000134122
YJR046W	263.909	0.502663	0.110765	4.53811	5.67609e-06	0.000135023
YNL058C	986.195	-0.475943	0.104909	-4.53673	5.71335e-06	0.000135406
YDL208W	2345.32	-0.454333	0.100316	-4.52901	5.92613e-06	0.000139931
YER176W	971.752	0.436676	0.0964967	4.5253	6.03113e-06	0.000141887
YOR346W	448.425	-0.446967	0.098888	-4.51993	6.18608e-06	0.000144999
YIL108W	639.369	-0.428128	0.0948369	-4.51435	6.35099e-06	0.0001481
YHR054C	676.616	-0.409481	0.0907157	-4.5139	6.36467e-06	0.0001481
YPL283C	564.505	-0.446921	0.0994054	-4.49594	6.92636e-06	0.000160586
YER167W	788.459	-0.439734	0.0978506	-4.49393	6.99205e-06	0.000161524
YOR018W	461.399	-0.487713	0.10856	-4.49258	7.03659e-06	0.000161968
YJL001W	2490.97	0.346108	0.0770736	4.49061	7.10182e-06	0.000162884
YGL240W	186.743	0.560053	0.124765	4.48887	7.1601e-06	0.000163634
YDR155C	15355.9	0.332814	0.0741811	4.48652	7.23976e-06	0.0001637
YDR259C	258.162	-0.548756	0.122295	-4.48715	7.2181e-06	0.0001637
YPL171C	179.699	-0.600111	0.133727	-4.48758	7.20382e-06	0.0001637
YGR296W	566.832	-0.444875	0.0992245	-4.48351	7.34236e-06	0.000165436
YDL025W-A	154.975	-0.608111	0.135748	-4.4797	7.47468e-06	0.000167239
YKR092C	599.245	-0.470776	0.10509	-4.47973	7.47367e-06	0.000167239
YKL154W	360.866	-0.496173	0.110784	-4.47874	7.50836e-06	0.000167408
YJL183W	277.201	-0.525993	0.117506	-4.4763	7.5948e-06	0.000168747
YDR017C	793.171	0.414244	0.0926662	4.47028	7.81178e-06	0.000172771
YHR137W	240.694	0.541194	0.121078	4.46978	7.82993e-06	0.000172771
YJL142C	381.043	-0.480745	0.107649	-4.46585	7.97522e-06	0.000175321
YNL064C	2725.33	0.377837	0.0846185	4.46518	8.00027e-06	0.000175321
YDR154C	9582.99	0.330071	0.0740357	4.45827	8.26256e-06	0.000180451
YDR370C	319.591	-0.492362	0.110588	-4.45223	8.49842e-06	0.000184971
YEL020C-B	820.178	-0.491241	0.110444	-4.44786	8.6732e-06	0.000187499
YER147C-A	917.397	-0.402103	0.0903997	-4.44806	8.665e-06	0.000187499
YML113W	139.032	-0.597693	0.134406	-4.44691	8.71149e-06	0.000187693
YML106W	2400.85	-0.357711	0.0805371	-4.44156	8.93073e-06	0.000191656
YPR151C	1432.52	0.477086	0.107428	4.44097	8.95533e-06	0.000191656
YHL030W	411.371	0.459369	0.103463	4.43994	8.99842e-06	0.000191936
YER013W	519.857	0.457838	0.103277	4.43312	9.28805e-06	0.000197456
YCR073C	482.038	-0.428206	0.0966308	-4.43136	9.36406e-06	0.000197777
YHR195W	1290.49	-0.366779	0.0827694	-4.43134	9.36496e-06	0.000197777
YOR277C	3090.78	-0.545988	0.123319	-4.42746	9.53481e-06	0.000200701
YKL186C	993.007	-0.384812	0.0869537	-4.42548	9.6227e-06	0.000201352
YMR292W	374.327	-0.53035	0.119844	-4.42535	9.62863e-06	0.000201352
YDL025C	1462.23	-0.464072	0.104961	-4.42138	9.80704e-06	0.000203091
YKL143W	1615.57	0.376406	0.0851225	4.42193	9.78218e-06	0.000203091
YLL055W	500.334	-0.473775	0.107142	-4.42193	9.78209e-06	0.000203091
YDR404C	881.58	-0.387808	0.0877488	-4.41952	9.89215e-06	0.000204193
YOL029C	249.529	-0.505923	0.114625	-4.41371	1.01615e-05	0.000209079
YDL099W	1738.81	0.383024	0.0868204	4.41168	1.02571e-05	0.00021037
YGL117W	3641.75	-0.395296	0.0896266	-4.41047	1.03144e-05	0.000210869
YJL133W	667.805	-0.400423	0.0908182	-4.40906	1.03819e-05	0.000211573
YLR099C	324.872	-0.471717	0.107047	-4.40663	1.04991e-05	0.000213282
YJR060W	972.138	0.414074	0.0941621	4.39746	1.09526e-05	0.00022179
YLR466C-A	108.555	-0.626358	0.142517	-4.39497	1.10786e-05	0.000223633
YBR182C	291.926	-0.50646	0.115293	-4.39281	1.11897e-05	0.000225166
YDR545C-A	107.309	-0.62753	0.142983	-4.38886	1.13948e-05	0.000227872
YOR344C	709.119	0.426669	0.0972167	4.38885	1.13954e-05	0.000227872
YOR224C	1640.91	-0.475515	0.108408	-4.38635	1.15267e-05	0.000229779
YLR432W	2062.08	-0.360689	0.0823096	-4.3821	1.1754e-05	0.000233584
YAL040C	252.325	-0.552669	0.126179	-4.38004	1.18658e-05	0.000235074
YLR467C-A	108.44	-0.623994	0.142565	-4.37691	1.20371e-05	0.000237002
YOR396C-A	108.44	-0.623994	0.142565	-4.37691	1.20371e-05	0.000237002
YDR533C	924.91	-0.408586	0.0935394	-4.36806	1.25355e-05	0.000246057
YDR492W	267.061	-0.500823	0.114685	-4.36694	1.26001e-05	0.000246569
YGR266W	1230.39	0.383124	0.0877843	4.36438	1.27484e-05	0.000248711
YIL118W	774.903	-0.398204	0.0912905	-4.36194	1.28912e-05	0.000250732
YGR159C	1371.21	-0.415101	0.0952285	-4.359	1.30661e-05	0.000253363
YBL069W	956.53	-0.398585	0.0914728	-4.35742	1.31605e-05	0.000254423
YIL153W	468.294	-0.450894	0.103559	-4.35399	1.33679e-05	0.000257655
YHL034W-A	2792.04	0.37746	0.0867695	4.35015	1.36044e-05	0.000261426
YHR005C-A	1581.37	-0.38271	0.0879981	-4.34907	1.36718e-05	0.000261934
YNL326C	307.558	-0.496237	0.114121	-4.34834	1.3717e-05	0.000262015
YLR376C	132.367	-0.60108	0.138445	-4.34164	1.41422e-05	0.000269334
YLR336C	398.318	0.493954	0.113825	4.33961	1.42738e-05	0.000271033
YMR246W	887.681	0.39275	0.090682	4.33107	1.48385e-05	0.000280922
YPR067W	577.692	-0.436015	0.1007	-4.32984	1.49214e-05	0.000281659
YPL136W	155.143	0.596301	0.138072	4.31877	1.56898e-05	0.000295292
YGL096W	346.625	-0.492734	0.114159	-4.31622	1.58723e-05	0.00029698
YOR125C	544.252	-0.43834	0.101556	-4.31623	1.58719e-05	0.00029698
YOR020C	4487.59	0.401359	0.0930131	4.31508	1.59548e-05	0.000297652
YLR051C	751.639	-0.437582	0.101442	-4.31363	1.60594e-05	0.000298734
YFR044C	2467.83	0.402648	0.093411	4.31049	1.62892e-05	0.000301256
YNL339C	562.539	-0.427622	0.0992032	-4.31057	1.62836e-05	0.000301256
YGR099W	497.827	0.41366	0.0959943	4.30921	1.63839e-05	0.000302134
YOR276W	3477.08	-0.528842	0.12316	-4.29394	1.7553e-05	0.000322764
YJL069C	207.741	0.522743	0.122107	4.28103	1.86029e-05	0.000341088
YMR140W	1277.56	0.38025	0.0888467	4.27984	1.87028e-05	0.00034194
YOR191W	959.213	0.42016	0.0984186	4.26911	1.96253e-05	0.000357784
YDL049C	232.833	-0.521666	0.122408	-4.26169	2.02888e-05	0.00036883
YPL039W	198.297	-0.53749	0.126352	-4.25391	2.10069e-05	0.000380801
YJL117W	743.314	-0.389297	0.0916879	-4.2459	2.17722e-05	0.00039356
YOL149W	785.117	-0.401282	0.0946055	-4.24163	2.219e-05	0.000399983
YGR034W	18233.1	-0.418113	0.0986265	-4.23935	2.24164e-05	0.000402929
YEL053W-A	9658.23	-0.413965	0.0977543	-4.23475	2.28803e-05	0.000410115
YOR103C	917.861	-0.47442	0.112105	-4.23193	2.31691e-05	0.000414132
YPL127C	1620.07	0.353561	0.0836859	4.22486	2.39091e-05	0.000426168
YLL027W	1081.82	-0.364274	0.0863007	-4.22098	2.43238e-05	0.000432356
YLR045C	849.702	0.428549	0.101778	4.21062	2.54671e-05	0.000451424
YML074C	6338.5	0.355374	0.084427	4.20924	2.56228e-05	0.000451681
YPL160W	2208.96	0.376799	0.0895082	4.20966	2.55756e-05	0.000451681
YOR317W	6967.24	0.390719	0.0929222	4.2048	2.61318e-05	0.000459388
YLR147C	539.702	-0.418789	0.0996783	-4.20141	2.65259e-05	0.000465039
YBL113C	278.315	-0.471435	0.112258	-4.19958	2.67405e-05	0.000466247
YGR145W	1033.75	0.384045	0.0914395	4.19999	2.66926e-05	0.000466247
YBR026C	1961.52	0.330409	0.0787828	4.19393	2.74165e-05	0.000474182
YJR138W	577.859	0.407471	0.0971353	4.19488	2.7302e-05	0.000474182
YNL294C	1586.86	-0.337214	0.0804172	-4.1933	2.7492e-05	0.000474182
YOR127W	629.927	-0.435967	0.103962	-4.19351	2.74669e-05	0.000474182
YPR046W	174.954	-0.55204	0.131698	-4.1917	2.76876e-05	0.000476271
YHR219W	263.845	-0.481683	0.114953	-4.19026	2.78632e-05	0.000478006
YDL036C	750.116	0.378987	0.0904678	4.18919	2.79948e-05	0.000478981
YHL034C	6134.21	0.346211	0.0827217	4.18526	2.84846e-05	0.000486061
YDL239C	142.081	-0.555431	0.132821	-4.1818	2.89205e-05	0.000492187
YOR107W	114.87	-0.624191	0.14939	-4.17827	2.93736e-05	0.000498572
YER023C-A	859.445	0.358952	0.0859712	4.17526	2.97644e-05	0.000503869
YLR008C	524.264	-0.438814	0.105262	-4.16876	3.06261e-05	0.000517088
YLL022C	816.875	0.367819	0.0885366	4.15443	3.26105e-05	0.000549143
YLR443W	521.776	-0.417533	0.100678	-4.14721	3.3655e-05	0.000563766
YNL127W	820.029	0.362842	0.0874812	4.14766	3.35897e-05	0.000563766
YFL026W	1003.19	-0.400099	0.0964896	-4.14655	3.37523e-05	0.000563918
YLR407W	325.548	-0.456565	0.110173	-4.14409	3.41172e-05	0.000568531
YOR206W	2146.35	0.373099	0.0900983	4.14102	3.45764e-05	0.000574687
YBL039W-B	426.768	-0.472436	0.114335	-4.13202	3.59594e-05	0.000596125
YIL114C	205.6	-0.52942	0.12815	-4.13125	3.60791e-05	0.000596564
YDR130C	653.885	0.376823	0.0912313	4.13041	3.62121e-05	0.00059722
YPL085W	825.969	0.415312	0.100578	4.12926	3.63939e-05	0.000598675
YGR065C	406.257	-0.428793	0.103877	-4.12788	3.66124e-05	0.000600725
YER006W	2187.98	0.344806	0.0835976	4.12459	3.71401e-05	0.000607824
YIL042C	475.124	-0.409682	0.0993693	-4.12282	3.74255e-05	0.000610933
YIR014W	159.893	0.52698	0.12788	4.1209	3.77398e-05	0.000613914
YER004W	1344.42	0.344293	0.0835749	4.11958	3.79571e-05	0.000613914
YMR128W	800.998	0.435058	0.105599	4.11991	3.79017e-05	0.000613914
YNL066W	603.778	-0.400615	0.0972518	-4.11936	3.79919e-05	0.000613914
YAL054C	884.953	0.534292	0.129722	4.11876	3.80922e-05	0.000613985
YCR036W	1719.29	-0.339533	0.0824655	-4.11728	3.8337e-05	0.000614834
YPL066W	1082.05	-0.365141	0.0886764	-4.11767	3.82716e-05	0.000614834
YPL088W	604.873	-0.407242	0.0989912	-4.11392	3.88998e-05	0.000622299
YNR054C	513.314	0.405463	0.0986059	4.11195	3.92326e-05	0.000626058
YPL149W	1419	0.365721	0.0890092	4.1088	3.97727e-05	0.000633099
YDL158C	108.009	-0.586843	0.14293	-4.10581	4.02895e-05	0.000639733
YIL110W	371.571	-0.489707	0.119404	-4.10128	4.10877e-05	0.000645726
YHR143W-A	559.597	-0.522276	0.127359	-4.10081	4.11715e-05	0.000645726
YKL048C	335.27	0.445124	0.108495	4.10273	4.08299e-05	0.000645726
YLR133W	1198.85	0.391878	0.0955216	4.10251	4.08696e-05	0.000645726
YLR332W	1559.47	-0.360652	0.0879424	-4.10101	4.11358e-05	0.000645726
YKR056W	735.59	0.371596	0.0906747	4.09812	4.16517e-05	0.00065166
YML091C	2605.28	-0.376836	0.0919988	-4.09609	4.20179e-05	0.000655787
YBL042C	1138.92	-0.378247	0.0923758	-4.09465	4.22806e-05	0.000658282
YDR232W	747.551	-0.383314	0.0936811	-4.09169	4.28236e-05	0.000664024
YLR244C	1142.38	0.388251	0.0949049	4.09095	4.29608e-05	0.000664024
YPL283W-B	103.084	-0.591138	0.144496	-4.09103	4.2946e-05	0.000664024
YIL084C	674.466	0.372295	0.0910858	4.0873	4.36426e-05	0.000672937
YNR016C	1998.79	0.350938	0.0859019	4.08534	4.40127e-05	0.000677012
YFL007W	1181.68	0.356971	0.0874345	4.08272	4.4512e-05	0.000681417
YPL205C	213.056	-0.480574	0.117696	-4.08319	4.4421e-05	0.000681417
YIL125W	3034.42	-0.399981	0.0980107	-4.081	4.48426e-05	0.000684839
YEL020W-A	1125.23	-0.452103	0.11084	-4.07889	4.52511e-05	0.000689433
YDR123C	391.18	0.447506	0.109848	4.07388	4.62364e-05	0.000702771
YNR015W	560.97	-0.38799	0.0953278	-4.07007	4.69997e-05	0.00071268
YGR191W	690.435	-0.37967	0.0934082	-4.06463	4.81077e-05	0.000727757
YER066C-A	6165.18	-0.327365	0.0805719	-4.06302	4.84418e-05	0.000731082
YJL089W	617.785	-0.403923	0.0994933	-4.0598	4.91143e-05	0.000739488
YML063W	34916.9	-0.360314	0.0887902	-4.05804	4.94865e-05	0.000743342
YKR012C	391.351	0.417927	0.103054	4.05542	5.00447e-05	0.000749967
YOR080W	510.233	-0.397134	0.0980263	-4.0513	5.09346e-05	0.00076152
YGL172W	572.966	-0.385175	0.0951583	-4.04773	5.17162e-05	0.000771403
YPL221W	979.741	-0.345994	0.0855243	-4.04556	5.21974e-05	0.00077677
YKR095W	1774.56	0.343186	0.0848456	4.04484	5.236e-05	0.000777382
YBR289W	416.072	0.448769	0.110964	4.04427	5.24874e-05	0.000777469
YKL045W	784.047	0.363215	0.0898222	4.04371	5.26121e-05	0.000777516
YGL048C	3915.64	0.303214	0.0750502	4.04015	5.34176e-05	0.000786279
YLR350W	4751.25	0.322476	0.0798207	4.04	5.34507e-05	0.000786279
YNL202W	360.901	0.437532	0.108322	4.03918	5.36382e-05	0.000787227
YJL123C	2816.9	0.352405	0.0872783	4.03772	5.39737e-05	0.000790338
YIL139C	397.694	-0.42245	0.104643	-4.03708	5.41213e-05	0.000790689
YNL057W	349.712	-0.473819	0.11744	-4.03455	5.47067e-05	0.000797422
YER148W	1288.62	-0.348395	0.0864138	-4.03171	5.53733e-05	0.000805303
YIL078W	7843.77	0.332583	0.0825399	4.02936	5.59284e-05	0.000811532
YER190C-B	103.411	-0.58117	0.144442	-4.02357	5.73231e-05	0.00082615
YGR296C-B	103.411	-0.58117	0.144442	-4.02357	5.73231e-05	0.00082615
YPR204C-A	103.411	-0.58117	0.144442	-4.02357	5.73231e-05	0.00082615
YPL249C	842.683	0.389926	0.0970165	4.01917	5.84036e-05	0.00083983
YDL040C	1458.34	0.330946	0.0823752	4.01754	5.88078e-05	0.000843746
YAL003W	8363.47	-0.406471	0.101259	-4.01417	5.96563e-05	0.000854007
YER003C	1863.74	0.311936	0.0777668	4.01118	6.04163e-05	0.000862955
YDR252W	213.704	0.490152	0.12222	4.01042	6.0611e-05	0.000863808
YDR146C	425.792	-0.423787	0.105719	-4.00861	6.10783e-05	0.000868533
YML030W	1129.19	-0.336727	0.0843452	-3.99224	6.54513e-05	0.000926599
YOL077W-A	1748.04	-0.340138	0.085196	-3.99241	6.54045e-05	0.000926599
YBR262C	1092.7	-0.447731	0.112546	-3.9782	6.944e-05	0.000980115
YJL106W	212.18	-0.485231	0.121983	-3.97786	6.95377e-05	0.000980115
YGR138C	999.819	-0.402779	0.101352	-3.97406	7.06583e-05	0.000989371
YLR347C	511.421	0.389982	0.0981179	3.97462	7.04914e-05	0.000989371
YOL113W	1638.78	-0.352599	0.0887144	-3.97455	7.05135e-05	0.000989371
YAL036C	485.261	-0.438693	0.110563	-3.9678	7.25379e-05	0.00101347
YCL031C	1069.14	-0.353616	0.089191	-3.96471	7.34865e-05	0.00101996
YEL077C	410.279	-0.416171	0.104949	-3.96546	7.32541e-05	0.00101996
YMR303C	5232.68	0.350504	0.0883976	3.96508	7.33701e-05	0.00101996
YNR052C	567.108	-0.421566	0.106357	-3.96369	7.37993e-05	0.00101996
YPR141C	333.382	0.437869	0.11046	3.96404	7.36931e-05	0.00101996
YNR061C	470.658	-0.385885	0.0975114	-3.95733	7.57914e-05	0.00104524
YBR286W	10797.8	0.307838	0.0778616	3.95366	7.69637e-05	0.00105912
YLR264C-A	2763.83	-0.724814	0.183354	-3.95309	7.71484e-05	0.00105938
YIL040W	289.283	-0.46476	0.117818	-3.94473	7.98885e-05	0.00109466
YLL066C	457.795	-0.40497	0.102693	-3.94351	8.0298e-05	0.00109792
YPR167C	671.485	-0.377857	0.0958407	-3.94255	8.06191e-05	0.00109996
YOR105W	244.914	-0.473294	0.12016	-3.93887	8.1868e-05	0.00111462
YGR169C-A	525.331	-0.384456	0.0976339	-3.93774	8.22536e-05	0.0011175
YMR136W	1385.6	-0.374361	0.0951375	-3.93495	8.32136e-05	0.00112814
YPL042C	455.042	0.392877	0.0998894	3.93312	8.38507e-05	0.00113438
YDR502C	879.116	0.357295	0.090943	3.92878	8.53784e-05	0.00115261
YGL062W	3482.8	-0.341138	0.0868704	-3.92698	8.60203e-05	0.00115883
YKL042W	386.573	0.396767	0.1012	3.92063	8.83191e-05	0.0011873
YHR065C	1501.96	0.339324	0.0865634	3.91995	8.85661e-05	0.00118812
YDL066W	1921.8	-0.323952	0.0826748	-3.91839	8.91434e-05	0.00119336
YKR018C	2047.89	0.366022	0.0934493	3.9168	8.97339e-05	0.00119431
YMR296C	875.383	-0.340602	0.0869618	-3.91669	8.97739e-05	0.00119431
YPR018W	375.005	0.417551	0.106598	3.91707	8.96303e-05	0.00119431
YDL235C	1464.94	-0.370338	0.094651	-3.91267	9.12803e-05	0.00121183
YMR173W	5973.87	-0.394146	0.10079	-3.91058	9.20733e-05	0.00121983
YHR076W	955.96	0.330756	0.0846123	3.90907	9.26503e-05	0.00122494
YFL016C	782.352	0.398037	0.101947	3.90435	9.44774e-05	0.00124395
YOR102W	894.347	-0.443645	0.113619	-3.90468	9.43504e-05	0.00124395
YDL072C	3633.62	-0.289552	0.0741944	-3.90261	9.5161e-05	0.00124782
YGL162W	251.253	-0.453424	0.116178	-3.90285	9.50672e-05	0.00124782
YJL074C	311.188	0.419531	0.107518	3.90196	9.54164e-05	0.00124861
YBR092C	786.543	-0.376597	0.0965738	-3.89957	9.6363e-05	0.00125842
YDR354W	1356.29	-0.334757	0.0859022	-3.89695	9.74117e-05	0.00126953
YEL057C	746.567	-0.385754	0.099062	-3.89406	9.85788e-05	0.00127953
YML028W	19228.6	0.281505	0.0722844	3.89442	9.84347e-05	0.00127953
YFL023W	182.667	0.477711	0.122772	3.89104	9.98154e-05	0.00129295
YDR192C	226.171	-0.472898	0.121641	-3.88765	0.00010122	0.00129916
YEL077W-A	92.3574	-0.578755	0.148875	-3.88753	0.000101271	0.00129916
YJL047C	677.226	0.382372	0.0983238	3.88891	0.000100696	0.00129916
YKL086W	148.45	-0.543356	0.139749	-3.88808	0.000101041	0.00129916
YOR312C	21818.2	-0.368621	0.0948237	-3.88743	0.00010131	0.00129916
YPL272C	95.787	-0.590215	0.151985	-3.88338	0.000103016	0.0013184
YGL153W	948.699	0.327594	0.0843938	3.88173	0.000103715	0.00132205
YLR411W	283.109	0.50968	0.131288	3.88216	0.000103532	0.00132205
YFL027C	498.351	0.376147	0.0969402	3.88019	0.000104373	0.0013278
YER144C	704.521	-0.383469	0.0988694	-3.87855	0.000105083	0.00133322
YGL225W	588.85	-0.396985	0.102362	-3.87824	0.000105216	0.00133322
YJL081C	1005.52	0.347151	0.0895465	3.87677	0.000105851	0.00133862
YCR043C	596.451	-0.433354	0.111812	-3.87575	0.000106298	0.00134162
YKR024C	137.42	0.531274	0.137176	3.87294	0.000107529	0.00135448
YBR073W	623.376	0.386612	0.0998545	3.87175	0.000108057	0.00135846
YCR077C	1140.11	-0.351063	0.0906926	-3.87091	0.000108428	0.00136046
YNR047W	669.44	0.370494	0.0957689	3.86862	0.000109451	0.0013706
YJL157C	309.583	-0.432575	0.111877	-3.86653	0.000110397	0.00137974
YDR449C	432.447	0.395222	0.102338	3.86193	0.000112496	0.00140324
YNL168C	1543.99	0.317639	0.0823121	3.85895	0.000113874	0.00141492
YPL238C	1851.51	-0.382161	0.0990306	-3.85902	0.000113844	0.00141492
YBR115C	14537.8	-0.347584	0.0901221	-3.85681	0.000114878	0.00142186
YPL237W	3693.23	-0.360506	0.0934627	-3.85722	0.000114684	0.00142186
YNL190W	2235.41	-0.322432	0.0838757	-3.84417	0.000120962	0.00149428
YPL024W	759.167	-0.388251	0.101111	-3.83983	0.000123121	0.00151802
YDR346C	2123.76	-0.304385	0.0792841	-3.83917	0.000123453	0.00151919
YOL091W	172.588	-0.510883	0.133116	-3.83787	0.000124105	0.00152151
YPL043W	619.084	0.404711	0.105453	3.83785	0.000124117	0.00152151
YOR074C	502.591	0.377376	0.0984292	3.83398	0.000126085	0.00154267
YDR122W	854.505	-0.330846	0.0863793	-3.83015	0.000128065	0.00156093
YLR036C	387.06	-0.409422	0.106891	-3.83028	0.000127999	0.00156093
YEL009C	7035.15	-0.356875	0.0932588	-3.82672	0.000129861	0.00157981
YLR107W	913.839	-0.362292	0.0946867	-3.82622	0.000130124	0.00158
YBR031W	32568.1	0.267539	0.0699423	3.82514	0.000130699	0.00158399
YMR316W	2723.1	-0.392805	0.102766	-3.82234	0.000132192	0.00159905
YHR052W	1063.42	-0.375507	0.0983288	-3.81889	0.000134053	0.0016185
YJR084W	591.437	0.350335	0.0919622	3.80955	0.00013922	0.00167771
YPL119C	292.199	0.427248	0.11227	3.80552	0.000141506	0.00170207
YER080W	1830.31	0.358453	0.0942087	3.80489	0.00014187	0.00170323
YNL039W	882.956	0.373343	0.0982335	3.80056	0.000144367	0.00172998
YNL029C	279.421	-0.426709	0.112329	-3.79873	0.00014544	0.00173957
YFL048C	1060.76	-0.346691	0.0913688	-3.79441	0.000147995	0.00176682
YJL048C	3811.14	0.333796	0.0880037	3.79298	0.000148852	0.00177375
YDR150W	1531.6	0.334267	0.088184	3.79056	0.00015031	0.00178448
YER036C	1704.26	-0.336758	0.0888384	-3.79068	0.000150238	0.00178448
YLR081W	23438.9	-0.338325	0.089314	-3.78804	0.000151838	0.00179928
YBL100C	962.053	-0.393452	0.104041	-3.78168	0.000155771	0.00183907
YBR230W-A	230.652	0.478719	0.126584	3.78183	0.000155681	0.00183907
YFR037C	2201.19	0.331488	0.0876781	3.78073	0.000156368	0.00184071
YLR413W	319.906	-0.439901	0.116364	-3.78039	0.000156584	0.00184071
YOR334W	106.698	-0.538403	0.142431	-3.78009	0.000156772	0.00184071
YOR326W	2137.47	0.319018	0.0844141	3.77921	0.000157328	0.00184385
YJR016C	3056.11	-0.296491	0.0784974	-3.77708	0.000158678	0.00185627
YEL054C	15400.6	-0.359318	0.0951673	-3.77564	0.000159596	0.0018636
YDL179W	509.311	-0.385869	0.102378	-3.76907	0.000163854	0.00190984
YBL068W-A	259.506	-0.444819	0.118092	-3.7667	0.000165417	0.00192455
YPR144C	989.354	0.346556	0.0920619	3.76438	0.000166965	0.00193903
YNL088W	1221.24	0.343933	0.0914788	3.75971	0.000170114	0.00197202
YDR029W	335.442	0.398345	0.105998	3.75803	0.000171258	0.0019817
YFR036W-A	1077.37	0.338755	0.0903591	3.74898	0.000177552	0.00205082
YOL109W	20011.4	-0.329396	0.0878893	-3.74785	0.000178357	0.0020564
YML133C	508.297	-0.374434	0.0999351	-3.74677	0.000179127	0.00206157
YJL068C	1078.96	0.322972	0.086238	3.74513	0.000180303	0.00206397
YLR190W	517.968	-0.420801	0.11234	-3.74579	0.000179828	0.00206397
YML046W	273.761	-0.430121	0.114841	-3.74535	0.000180143	0.00206397
YPL189C-A	699.679	-0.38028	0.101578	-3.74371	0.000181323	0.00207194
YGL229C	216.398	-0.454565	0.121524	-3.74053	0.000183635	0.00209089
YGR108W	386.446	-0.406025	0.108536	-3.74093	0.000183339	0.00209089
YPL201C	113.327	0.564818	0.151107	3.73786	0.000185593	0.00210943
YOR141C	1119.43	0.352641	0.0944602	3.73322	0.000189045	0.00214486
YBR211C	577.685	-0.347625	0.0931794	-3.73071	0.000190943	0.00216256
YGR270C-A	124.084	0.533527	0.143059	3.72941	0.000191928	0.00216987
YPL044C	154.535	0.525345	0.140976	3.72648	0.000194174	0.0021914
YKL212W	1290.83	-0.312726	0.0839715	-3.7242	0.000195936	0.00220738
YMR215W	1397.36	0.307067	0.0824667	3.72353	0.000196457	0.00220937
YMR173W-A	5437.17	-0.369493	0.0992552	-3.72266	0.000197136	0.00221311
YGR168C	499.206	-0.399691	0.107433	-3.72036	0.000198935	0.0022294
YFL068W	105.838	-0.530661	0.142682	-3.71918	0.000199872	0.00223207
YLL067W-A	105.838	-0.530661	0.142682	-3.71918	0.000199872	0.00223207
YIL004C	361.147	-0.411928	0.110822	-3.71704	0.000201574	0.0022447
YGR160W	483.363	-0.39432	0.106089	-3.71687	0.000201704	0.0022447
YOL067C	279.112	0.409266	0.110187	3.71429	0.000203779	0.00226385
YLR073C	102.994	-0.567994	0.152985	-3.71274	0.00020503	0.00227381
YDR356W	493.978	0.408601	0.110149	3.70952	0.000207654	0.00229892
YML073C	14798.4	-0.376555	0.101607	-3.70599	0.000210569	0.00232717
YGR046W	1054.09	-0.311646	0.0842163	-3.70054	0.000215141	0.0023736
YLL058W	199.013	-0.445646	0.12056	-3.69647	0.000218622	0.00240785
YER055C	1843.32	-0.316879	0.0858011	-3.69318	0.000221466	0.00243499
YJL190C	15980.3	-0.388167	0.105117	-3.69272	0.000221867	0.00243521
YHR123W	348.946	0.390242	0.105718	3.69136	0.000223062	0.00244413
YOL105C	261.914	-0.469884	0.127436	-3.68722	0.00022672	0.00247997
YOR091W	1685.67	0.309835	0.0841333	3.68266	0.000230809	0.00251877
YPR136C	98.6551	0.543827	0.147683	3.68239	0.000231055	0.00251877
YDR293C	3186.25	-0.35634	0.0968186	-3.68048	0.000232791	0.00252909
YHL002C-A	568.145	0.373864	0.101579	3.68052	0.000232755	0.00252909
YOL122C	414.415	-0.368006	0.100051	-3.6782	0.000234889	0.00254755
YMR318C	2795.63	-0.315394	0.0857816	-3.67671	0.000236263	0.00255812
YNL175C	1522	0.371858	0.101178	3.67527	0.000237602	0.00256827
YHR001W	1179.21	0.300441	0.0817657	3.67442	0.000238391	0.00257245
YML058W	1567.01	0.33975	0.0924862	3.67352	0.000239236	0.00257672
YNL320W	250.22	-0.424902	0.115678	-3.67314	0.000239592	0.00257672
YDL184C	5400.69	0.394483	0.107421	3.67233	0.000240352	0.00258056
YLR246W	367.904	-0.386999	0.10541	-3.67137	0.000241251	0.00258587
YGR014W	341.178	-0.403601	0.109961	-3.6704	0.000242174	0.00258781
YOR247W	6297.73	0.271672	0.0740184	3.67033	0.000242241	0.00258781
YIL106W	795.91	-0.322956	0.0880413	-3.66823	0.000244238	0.00260046
YLR261C	760.498	-0.359858	0.0980977	-3.66836	0.000244108	0.00260046
YOL114C	183.163	0.459245	0.125385	3.66267	0.0002496	0.00265314
YFL012W-A	71.6582	0.592066	0.161698	3.66156	0.000250684	0.00266024
YJL167W	7259.06	0.270607	0.0739159	3.66101	0.000251221	0.00266153
YDL201W	796.724	-0.356694	0.0975249	-3.65747	0.000254716	0.00269409
YDR047W	1526.48	0.319855	0.0874762	3.65648	0.000255698	0.00269557
YML100W	4260.64	-0.389112	0.106406	-3.65685	0.00025533	0.00269557
YIL121W	283.39	-0.400425	0.109554	-3.65506	0.000257118	0.00270609
YLL052C	152.938	-0.472502	0.129467	-3.64958	0.000262669	0.00275996
YER079W	1421.61	0.362218	0.0993936	3.64428	0.000268142	0.00281286
YLL066W-A	106.182	-0.520505	0.142848	-3.64377	0.00026867	0.00281378
YDL086W	2465.25	0.286611	0.0787579	3.63914	0.00027355	0.0028602
YGL157W	1759.32	-0.287692	0.0791064	-3.63678	0.000276069	0.00288184
YDR447C	10342.3	-0.361559	0.0994607	-3.6352	0.000277767	0.00289484
YER104W	364.973	0.384409	0.105853	3.63154	0.000281734	0.00293141
YER016W	731.229	-0.335381	0.0923948	-3.62988	0.000283558	0.00294183
YNL111C	1009.61	0.39245	0.108119	3.62979	0.000283655	0.00294183
YJL225C	611.874	-0.356134	0.09822	-3.62588	0.000287976	0.00298181
YPR157W	105.459	-0.526702	0.145311	-3.62465	0.000289354	0.00299124
YER056C-A	14501	-0.346725	0.0957666	-3.62052	0.000294009	0.00302693
YGL057C	250.07	-0.418918	0.115704	-3.62061	0.000293909	0.00302693
YOR338W	466.634	0.351086	0.0969762	3.62033	0.000294226	0.00302693
YDL101C	366.004	0.385435	0.106529	3.61813	0.000296738	0.00304684
YDR249C	151.532	-0.473991	0.131022	-3.61765	0.000297285	0.00304684
YLL067C	443.737	-0.368616	0.101901	-3.61739	0.00029759	0.00304684
YDR355C	41.2829	0.637497	0.176364	3.61466	0.000300741	0.00307419
YDR471W	9457.06	-0.354207	0.0980592	-3.61217	0.000303641	0.00309889
YJR008W	2028.8	0.310731	0.0860909	3.60933	0.000306985	0.00312802
YKL156C-A	1564.76	-0.414103	0.114764	-3.60831	0.000308195	0.00313536
YML065W	453.956	0.353804	0.0981213	3.60579	0.000311208	0.00316099
YER105C	1041.33	0.304539	0.0845457	3.60206	0.000315701	0.00320154
YNL262W	493.828	0.354653	0.0984725	3.60154	0.000316336	0.0032029
YDR504C	79.6084	-0.560401	0.15565	-3.60038	0.000317747	0.0032121
YDR343C	10300.4	0.368082	0.102399	3.5946	0.000324896	0.00327919
YIL177C	605.543	-0.351462	0.0978581	-3.59154	0.000328726	0.00331263
YPR156C	1012.47	-0.350165	0.0975359	-3.59011	0.000330534	0.00332561
YHR062C	732.072	0.320904	0.0894308	3.58829	0.000332852	0.00334368
YER089C	962.351	-0.322212	0.0898307	-3.58688	0.000334659	0.00335294
YMR117C	427.113	0.381441	0.106347	3.58675	0.000334823	0.00335294
YGL168W	185.767	-0.443812	0.12377	-3.58577	0.00033608	0.00336028
YOR075W	896.474	0.315509	0.0880257	3.58429	0.000337997	0.00337417
YHR018C	8090.19	-0.269281	0.0751679	-3.58239	0.000340463	0.00339349
YBR079C	3866.97	0.320126	0.0893922	3.58114	0.0003421	0.0034045
YLR146C	428.402	-0.365046	0.102009	-3.57858	0.000345463	0.00343263
YDR243C	386.333	0.361803	0.101145	3.57709	0.000347444	0.00344697
YFL008W	435.091	0.360427	0.100795	3.57583	0.000349123	0.00345826
YGR174W-A	233.935	-0.43458	0.121558	-3.57508	0.00035012	0.00346278
YBR181C	23432	-0.317641	0.0889552	-3.57079	0.000355899	0.00351451
YNR046W	604.704	-0.34586	0.0969178	-3.56859	0.000358907	0.00353874
YDR012W	21342.2	0.260636	0.0730975	3.56559	0.000363038	0.00357012
YML092C	1976.61	0.299895	0.084111	3.56547	0.000363205	0.00357012
YFL010W-A	977.296	0.310064	0.0869865	3.56451	0.000364536	0.00357771
YGR150C	793.413	0.31288	0.0878585	3.56118	0.000369196	0.0036179
YCL049C	1163.62	-0.290597	0.081642	-3.55941	0.000371688	0.00363675
YDR372C	1605.4	-0.290162	0.0815671	-3.55734	0.000374635	0.00365998
YDR314C	642.847	0.338139	0.0951997	3.55189	0.000382476	0.00372521
YJL066C	818.826	0.323217	0.0909909	3.55219	0.000382045	0.00372521
YJL071W	399.436	-0.373418	0.105149	-3.55134	0.000383278	0.00372735
YGR038W	401.045	-0.391911	0.110876	-3.53467	0.000408288	0.00395255
YKL059C	693.627	0.328082	0.092813	3.53487	0.000407971	0.00395255
YOL108C	1352.99	0.335236	0.0948321	3.53505	0.000407702	0.00395255
YJL197W	430.943	0.350644	0.0992181	3.53408	0.000409201	0.00395541
YGL195W	1309.2	0.299187	0.0847083	3.53197	0.000412482	0.00398111
YHR049C-A	118.561	0.491808	0.139318	3.53012	0.000415368	0.00400292
YMR168C	550.602	0.330636	0.0936721	3.52971	0.000416009	0.00400307
YPL001W	336.696	-0.376607	0.106724	-3.52878	0.000417486	0.00401125
YFL044C	588.533	0.34688	0.0983736	3.52615	0.000421647	0.00404516
YOR051C	2185.45	0.300249	0.0851652	3.52549	0.000422696	0.00404915
YDR032C	2234	0.278237	0.0789527	3.5241	0.000424929	0.00405235
YFL039C	18281.9	0.271189	0.0769405	3.52466	0.000424031	0.00405235
YGL263W	61.7786	0.579989	0.164578	3.5241	0.000424929	0.00405235
YDR342C	13025.6	0.359244	0.102035	3.52079	0.000430268	0.00409715
YAL011W	186.102	-0.442962	0.125899	-3.51838	0.000434188	0.00412833
YDL003W	259.703	0.407363	0.115826	3.51702	0.000436425	0.0041373
YPL090C	25855.2	-0.312924	0.088969	-3.51723	0.000436082	0.0041373
YGR157W	1380.57	0.314593	0.0895512	3.51299	0.000443096	0.00419433
YNR027W	330.588	-0.374558	0.106664	-3.51158	0.000445449	0.00421038
YOL081W	1830.67	0.340054	0.0968493	3.51117	0.000446147	0.00421076
YGR228W	482.392	-0.360544	0.10273	-3.50964	0.00044871	0.00422871
YEL006W	1010.04	0.318779	0.090845	3.50904	0.000449721	0.00423201
YHL033C	11683.3	-0.320389	0.0913222	-3.50834	0.000450913	0.00423435
YNL062C	1163.72	0.296016	0.0843803	3.50812	0.000451293	0.00423435
YHL009W-A	186.25	0.445832	0.127338	3.50116	0.000463242	0.00433919
YOL135C	358.891	0.378749	0.108189	3.50082	0.000463823	0.00433919
YLR082C	610.05	0.318547	0.091063	3.4981	0.00046859	0.00437738
YFL034C-A	1214.99	-0.322623	0.0922485	-3.49733	0.000469942	0.00438361
YBR023C	730.001	-0.324352	0.092783	-3.49582	0.000472615	0.00440213
YJR105W	2714.74	0.296824	0.0850771	3.48889	0.000485037	0.00451127
YHR145C	26.3798	-0.642693	0.184254	-3.48808	0.000486511	0.00451841
YJR073C	3267.7	0.354116	0.101584	3.48594	0.000490404	0.00454796
YLR320W	392.471	0.380561	0.109251	3.48335	0.000495172	0.00458554
YDR433W	2068.97	0.325633	0.0935063	3.48247	0.00049682	0.00459415
YOR340C	986.305	-0.319948	0.0919265	-3.48047	0.000500526	0.00462174
YPL177C	801.59	-0.305346	0.0877443	-3.47995	0.000501503	0.00462409
YJL159W	15221	-0.341831	0.098253	-3.47909	0.000503121	0.00463233
YER077C	381.26	-0.356767	0.102597	-3.47737	0.000506368	0.00465553
YGL215W	1892.17	-0.315867	0.0908689	-3.47607	0.000508821	0.00467137
YHR169W	227.954	0.432093	0.124364	3.47442	0.000511957	0.00469342
YPL141C	364.312	-0.423183	0.121919	-3.47102	0.000518482	0.00474645
YER184C	441.661	-0.377722	0.108849	-3.47014	0.000520184	0.00475523
YOL047C	296.242	-0.376956	0.108651	-3.46941	0.000521593	0.00476131
YNL303W	330.372	-0.435186	0.125695	-3.46224	0.000535698	0.0048831
YGL245W	4931.15	0.283176	0.0818541	3.45952	0.000541132	0.00491861
YJL067W	482.974	0.345439	0.0998436	3.4598	0.000540575	0.00491861
YGL207W	2076.16	0.325762	0.094226	3.45724	0.000545748	0.00495353
YGL142C	460.75	-0.348273	0.100917	-3.4511	0.000558317	0.00506044
YBR189W	34757	-0.257858	0.0748408	-3.44542	0.000570178	0.00516063
YBL103C	918.866	-0.336541	0.0978626	-3.43891	0.000584063	0.00527884
YKL065C	5026.01	-0.296241	0.0862952	-3.43287	0.000597219	0.00539013
YBR218C	2598.07	-0.296032	0.086246	-3.43241	0.000598233	0.00539168
YPL124W	272.007	0.387193	0.112825	3.43182	0.000599551	0.00539596
YDR257C	873.075	0.308211	0.0898333	3.43092	0.00060154	0.0054005
YPL009C	1360.95	0.331381	0.0965892	3.43083	0.000601743	0.0054005
YBR152W	193.349	0.41789	0.122024	3.42465	0.000615594	0.00551706
YJL016W	728.44	-0.348146	0.101817	-3.41934	0.000627723	0.0056179
YJR148W	1739.97	0.305995	0.0895026	3.41884	0.00062888	0.00562039
YHR165W-A	95.4586	0.523938	0.153291	3.41792	0.000631015	0.00563161
YHL008C	599.16	0.319263	0.0934552	3.41621	0.000634984	0.00565127
YLR048W	20092.7	-0.266204	0.0779201	-3.41637	0.000634614	0.00565127
YNL246W	1127.52	0.280862	0.0822539	3.41458	0.000638811	0.00567743
YEL072W	147.985	-0.443423	0.129917	-3.41314	0.000642198	0.00569188
YPL265W	2515.16	0.338903	0.0992941	3.41313	0.000642215	0.00569188
YDR170C	1404.75	0.302993	0.0888063	3.41183	0.000645273	0.00570318
YEL029C	343.86	-0.396274	0.116139	-3.41207	0.000644713	0.00570318
YGR058W	452.367	0.346694	0.101667	3.41009	0.000649425	0.00572683
YHR219C-A	100.884	-0.493376	0.144687	-3.40995	0.000649738	0.00572683
YDL086C-A	1705.4	0.271839	0.0797457	3.40883	0.000652429	0.00573433
YDR191W	66.6558	-0.542583	0.159187	-3.40847	0.000653279	0.00573433
YNL217W	1176.37	-0.328637	0.0964157	-3.40854	0.000653113	0.00573433
YDL053C	883.519	-0.316902	0.092989	-3.40795	0.00065454	0.00573753
YGL127C	175.63	-0.438695	0.128775	-3.40668	0.00065759	0.00575638
YDR022C	340.355	0.369572	0.108552	3.40457	0.000662685	0.00579306
YLL018C	7609.03	0.281026	0.0825704	3.40347	0.000665359	0.00580353
YNL227C	1111.67	0.314776	0.0924957	3.40314	0.00066617	0.00580353
YPL188W	780.94	-0.306991	0.0902129	-3.40296	0.000666604	0.00580353
YLR398C	857.765	0.341833	0.100608	3.39769	0.000679579	0.00590846
YCR065W	103.724	0.526014	0.154877	3.39634	0.000682934	0.00592154
YKR001C	3008.76	0.307356	0.0904916	3.39651	0.000682516	0.00592154
YML133W-B	100.769	-0.490798	0.144721	-3.39134	0.000695511	0.00600453
YNL339W-B	100.769	-0.490798	0.144721	-3.39134	0.000695511	0.00600453
YNL230C	265.817	0.388864	0.114654	3.39163	0.000694771	0.00600453
YPR187W	2132.09	-0.344163	0.101492	-3.39105	0.000696259	0.00600453
YPL162C	438.433	0.342167	0.100949	3.38951	0.000700168	0.00603012
YGR113W	627.657	0.340692	0.100632	3.38552	0.000710425	0.00611023
YBR119W	720.04	0.30988	0.0916234	3.3821	0.000719333	0.00617854
YLR448W	5945.24	-0.359754	0.106389	-3.3815	0.000720915	0.00618383
YER161C	1001.28	0.322461	0.095435	3.37885	0.0007279	0.00623538
YGL205W	407.249	0.608349	0.180126	3.37734	0.000731897	0.00625288
YOR196C	1401.85	-0.286668	0.0848776	-3.37743	0.000731675	0.00625288
YBL088C	655.569	0.306846	0.0909261	3.37467	0.000739038	0.00630547
YIL053W	4380.6	-0.317499	0.0941044	-3.3739	0.000741113	0.00631475
YDL016C	228.907	0.39495	0.117112	3.3724	0.000745151	0.00634072
YBL048W	119.378	-0.46767	0.138776	-3.36995	0.000751817	0.00635337
YEL058W	1529.57	-0.272692	0.080904	-3.37056	0.000750144	0.00635337
YEL013W	1213.38	-0.287211	0.0852344	-3.36967	0.000752595	0.00635337
YMR161W	687.992	0.315933	0.0937397	3.37032	0.000750804	0.00635337
YNL185C	281.894	-0.374276	0.111046	-3.37046	0.000750419	0.00635337
YOR342C	570.115	-0.330839	0.0981292	-3.37147	0.000747687	0.00635337
YCR008W	712.342	-0.321639	0.0955051	-3.36776	0.000757805	0.00638892
YKL140W	678.586	-0.327501	0.0973299	-3.36485	0.000765851	0.00644827
YPL211W	803.979	-0.347228	0.10326	-3.36267	0.000771928	0.00649089
YDR530C	1120.99	0.277093	0.0824183	3.36203	0.000773723	0.00649604
YPR152C	329.178	0.360493	0.107234	3.36173	0.000774571	0.00649604
YDR277C	2743.37	-0.302513	0.0900043	-3.3611	0.000776336	0.00650232
YMR227C	359.859	0.370801	0.110506	3.35548	0.000792264	0.00662705
YDR279W	636.44	0.309135	0.0921512	3.35465	0.000794648	0.00663832
YOR272W	1147.89	0.289096	0.0861901	3.35416	0.000796055	0.00664141
YPL074W	1134.35	0.305495	0.091125	3.35249	0.000800893	0.00667307
YOR052C	3946.53	-0.288084	0.0859796	-3.35061	0.00080634	0.00670971
YOR008C-A	39.7603	0.598729	0.178846	3.34774	0.00081474	0.00677081
YNL203C	172.152	0.43426	0.129734	3.3473	0.000816033	0.00677276
YER143W	1476.11	0.315289	0.0943032	3.34335	0.00082772	0.00686086
YER024W	3210.44	0.366963	0.109782	3.34264	0.00082984	0.00686953
YKL145W-A	265.082	0.388813	0.11637	3.34119	0.000834202	0.00689671
YPL049C	1516.51	0.279462	0.0837776	3.33576	0.000850667	0.00702377
YJR037W	115.951	0.469687	0.140883	3.33388	0.000856436	0.00706229
YDR038C	2041.83	0.332487	0.0997722	3.33246	0.000860804	0.00708006
YFR055W	456.205	0.335997	0.100824	3.33252	0.000860632	0.00708006
YNL293W	918.814	-0.306369	0.0920515	-3.32823	0.000874	0.00717937
YGR102C	591.899	-0.34793	0.104597	-3.32639	0.000879799	0.00721774
YML102W	632.307	0.311843	0.0937876	3.32499	0.000884202	0.00724457
YIL091C	480.318	0.365998	0.110105	3.32409	0.00088708	0.00725886
YER082C	756.665	0.333776	0.10047	3.32215	0.000893257	0.0072921
YNL284C	1368.32	-0.295104	0.0888304	-3.3221	0.000893422	0.0072921
YEL015W	1972.05	0.254438	0.076628	3.32042	0.000898808	0.00732672
YKR010C	226.733	0.390534	0.117735	3.31705	0.000909717	0.00740621
YKL027W	699.902	0.305989	0.092333	3.31397	0.000919809	0.00747885
YIL177W-A	102.757	-0.477151	0.144023	-3.31301	0.000922969	0.00748418
YJL225W-A	102.757	-0.477151	0.144023	-3.31301	0.000922969	0.00748418
YNR019W	2417.62	0.284682	0.0859363	3.31271	0.000923973	0.00748418
YGR096W	388.595	-0.343511	0.103749	-3.311	0.000929634	0.00752051
YJR103W	2805.36	0.287191	0.0867692	3.30982	0.000933547	0.00754264
YOR100C	787.495	0.393895	0.119049	3.30867	0.000937407	0.00756427
YNL132W	403.108	0.350437	0.105941	3.30786	0.000940104	0.00757648
YGL035C	1927.97	0.292017	0.0883354	3.30578	0.000947129	0.00761392
YJR059W	1524.78	-0.295362	0.0893454	-3.30585	0.0009469	0.00761392
YKL062W	1012.61	-0.319048	0.096545	-3.30466	0.000950931	0.00762532
YLR335W	1673.43	0.328408	0.0993693	3.30492	0.000950029	0.00762532
YOR316C	362.039	-0.341621	0.103432	-3.30285	0.000957084	0.00766505
YHL050C	278.606	-0.377139	0.114267	-3.30051	0.000965101	0.0077196
YDR389W	512.093	-0.349261	0.105885	-3.2985	0.000972019	0.00774805
YGR143W	725.25	-0.316826	0.0960536	-3.29842	0.00097229	0.00774805
YOL085C	2755.39	0.255754	0.0775323	3.29868	0.000971407	0.00774805
YNL187W	209.847	0.395581	0.119973	3.29725	0.000976367	0.00777086
YBR053C	1184.31	0.315547	0.0957647	3.29502	0.000984131	0.00782292
YBR245C	770.787	0.31855	0.0967726	3.29174	0.000995691	0.007905
YNR009W	149.498	0.42384	0.128902	3.28808	0.00100871	0.00799847
YCL059C	2368.15	0.280288	0.0852898	3.28631	0.00101511	0.00803922
YOR085W	712.637	-0.302074	0.0919448	-3.28538	0.00101845	0.00805572
YCL065W	54.0878	0.557232	0.16974	3.28284	0.00102765	0.00811845
YER065C	4584.98	-0.387489	0.118106	-3.28087	0.00103489	0.00816554
YDR224C	19462.6	0.235291	0.0718	3.27703	0.00104905	0.00826708
YIL066W-A	50.418	0.553969	0.16919	3.27425	0.00105941	0.00833811
YLR401C	1201.39	0.293468	0.0896383	3.27392	0.00106067	0.00833811
YOL086C	142367	-0.256948	0.0785483	-3.27121	0.00107087	0.00840798
YHR172W	232.34	0.374493	0.114522	3.27006	0.00107526	0.00843206
YGL158W	581.628	-0.326182	0.0998135	-3.26791	0.00108345	0.00848595
YOL084W	432.803	0.40597	0.124274	3.26674	0.00108792	0.00851054
YGR174C	1381.42	-0.310636	0.0951011	-3.26638	0.00108931	0.00851101
YDL069C	230.673	-0.37632	0.115252	-3.2652	0.00109388	0.00853623
YJL129C	635.321	-0.327858	0.100458	-3.26363	0.00109996	0.00857325
YOR278W	585.001	0.307965	0.094406	3.26213	0.00110577	0.00860808
YLR311C	38.8769	-0.576543	0.176836	-3.26032	0.00111285	0.00864216
YNL151C	695.353	-0.313597	0.0961774	-3.26061	0.00111174	0.00864216
YMR200W	2262.32	-0.281027	0.0863782	-3.25345	0.00114012	0.00884322
YML008C	4327.49	0.235963	0.0725656	3.25172	0.00114709	0.00888646
YGR166W	581.033	-0.304694	0.0937389	-3.25046	0.00115219	0.00891523
YPL047W	584.759	-0.364216	0.112065	-3.25004	0.00115387	0.0089174
YDR498C	805.058	0.291012	0.089573	3.24888	0.00115859	0.00894311
YGL030W	27197.9	0.280364	0.0863103	3.24833	0.00116085	0.00894974
YLR068W	220.529	-0.423026	0.130338	-3.24561	0.001172	0.00902484
YMR193W	1007.02	0.287644	0.0886391	3.24512	0.00117401	0.00902946
YNL130C	948.829	0.292127	0.0900496	3.24406	0.00117838	0.00905215
YKL171W	1014.5	0.295138	0.0909915	3.24358	0.00118036	0.00905648
YER130C	651.923	-0.303325	0.0935323	-3.243	0.00118277	0.00906415
YLR223C	217.434	0.415736	0.128251	3.24158	0.00118867	0.00908759
YNL181W	942.837	0.294027	0.0907012	3.24171	0.00118814	0.00908759
YIL082W	452.213	-0.315331	0.0973753	-3.2383	0.00120244	0.00918187
YAR002W	717.713	0.309438	0.0955789	3.23751	0.00120577	0.00919085
YFR010W-A	729.6	-0.320599	0.0990315	-3.23734	0.00120649	0.00919085
YLL040C	1468.52	0.287526	0.088883	3.23488	0.00121693	0.00925938
YBL039C-A	99.2551	-0.494091	0.152926	-3.23091	0.00123396	0.00937112
YDR256C	696.569	0.401936	0.124408	3.23078	0.00123454	0.00937112
YIR016W	525.164	-0.350452	0.108509	-3.2297	0.0012392	0.00939534
YIL023C	846.114	-0.293443	0.0909146	-3.22768	0.00124798	0.00945068
YGR124W	6608.37	0.277436	0.0859741	3.22697	0.00125109	0.00946304
YGR229C	1376.55	-0.283691	0.0879247	-3.22652	0.00125304	0.00946663
YDL100C	3284.05	0.243583	0.0755091	3.22588	0.00125586	0.00947674
YMR223W	224.465	-0.392509	0.121766	-3.22347	0.00126647	0.00954548
YDR289C	844.84	0.287251	0.0891738	3.22125	0.00127633	0.00960854
YPR005C	358.165	-0.343874	0.106886	-3.2172	0.00129449	0.00973377
YPL183W-A	356.825	-0.348906	0.108737	-3.2087	0.00133335	0.0100142
YDR531W	775.259	-0.292291	0.0911374	-3.20714	0.0013406	0.0100568
YDL133C-A	20217.6	0.37683	0.117534	3.20613	0.00134532	0.0100804
YGR021W	416.425	-0.337305	0.105237	-3.20519	0.00134975	0.01009
YNL228W	518.777	0.320364	0.0999453	3.20539	0.0013488	0.01009
YCR088W	1972.87	0.303184	0.0946418	3.20349	0.00135775	0.0101184
YDR426C	160.025	-0.420696	0.131329	-3.20337	0.00135829	0.0101184
YOR032C	249.797	-0.365101	0.113958	-3.20381	0.0013562	0.0101184
YHR049W	3004.39	0.265948	0.0830625	3.20178	0.00136581	0.0101626
YML031W	414.602	-0.316453	0.098917	-3.19918	0.0013782	0.0102429
YML088W	396.54	-0.33312	0.10448	-3.18835	0.00143088	0.0106221
YIL133C	11303.2	-0.25221	0.0791688	-3.18572	0.00144393	0.0106947
YMR313C	694.312	-0.298955	0.0938427	-3.18571	0.00144401	0.0106947
YJL153C	205.245	0.416619	0.130907	3.18255	0.00145985	0.0107995
YDR457W	1437.58	0.274511	0.0862968	3.18101	0.0014676	0.0108443
YOR123C	2209.25	0.316993	0.0996851	3.17995	0.00147302	0.0108718
YGL114W	585.709	-0.297247	0.0935045	-3.17896	0.00147803	0.0108962
YNL022C	707.965	0.308063	0.0969312	3.17817	0.00148209	0.010901
YPR021C	448.353	-0.320612	0.100878	-3.17822	0.00148181	0.010901
YLR331C	491.139	-0.328825	0.103496	-3.17718	0.00148717	0.0109258
YJL169W	33.034	-0.572764	0.180321	-3.17636	0.00149138	0.0109317
YJL052W	14426.1	0.231931	0.0730142	3.17652	0.00149056	0.0109317
YDL122W	643.013	-0.314466	0.0992062	-3.16982	0.00152532	0.011147
YER062C	457.943	-0.326461	0.102989	-3.16985	0.00152515	0.011147
YKL104C	1924.92	-0.275409	0.0868882	-3.1697	0.00152599	0.011147
YER060W	282.905	-0.354396	0.111843	-3.16868	0.00153132	0.0111733
YLR262C	1075.42	-0.282214	0.0892115	-3.16343	0.00155923	0.0113639
YDR432W	5349.5	0.276937	0.0876432	3.15982	0.00157868	0.0114925
YBL022C	1093.24	0.313275	0.0991893	3.15836	0.00158661	0.0115372
YOR078W	521.639	-0.332757	0.105395	-3.15725	0.00159267	0.0115681
YFR023W	83.302	-0.490365	0.155387	-3.15577	0.00160077	0.0116006
YPL267W	247.57	0.361127	0.114427	3.15596	0.00159972	0.0116006
YDR244W	1163.74	0.269632	0.0854725	3.15461	0.00160713	0.0116335
YPR116W	219.839	0.393198	0.124696	3.15326	0.00161459	0.0116743
YGL248W	2184.32	-0.252396	0.0801139	-3.15046	0.00163013	0.0117733
YGL152C	637.178	0.284219	0.0902344	3.14979	0.00163389	0.0117872
YPL053C	1731.01	-0.256494	0.0814415	-3.14942	0.00163595	0.0117888
YDR364C	278.356	-0.361656	0.114897	-3.14766	0.00164583	0.0118466
YEL033W	7855.26	-0.291689	0.0927168	-3.14602	0.00165509	0.0118999
YHL001W	6472.64	-0.325994	0.10369	-3.14392	0.00166702	0.0119625
YNL239W	2397.77	0.259647	0.0825894	3.14383	0.00166753	0.0119625
YGR188C	265.243	0.390065	0.124182	3.14108	0.00168328	0.0120619
YGR114C	295.396	0.363196	0.115746	3.13787	0.00170179	0.0121809
YKL163W	821.346	-0.369349	0.117725	-3.13739	0.00170457	0.0121872
YHL020C	1355.71	0.308511	0.0983645	3.1364	0.00171035	0.0122149
YGL223C	841.374	0.276321	0.0881432	3.13491	0.00171904	0.0122633
YMR078C	339.526	0.327537	0.104513	3.13394	0.00172476	0.0122767
YMR274C	178.953	-0.393705	0.125613	-3.13426	0.0017229	0.0122767
YCR027C	527.962	-0.307491	0.098198	-3.13133	0.00174014	0.0123168
YDL085C-A	469.999	-0.328818	0.105023	-3.13091	0.00174264	0.0123168
YER190C-A	64.611	-0.50205	0.160363	-3.13071	0.00174387	0.0123168
YGR296C-A	64.611	-0.50205	0.160363	-3.13071	0.00174387	0.0123168
YML133W-A	64.611	-0.50205	0.160363	-3.13071	0.00174387	0.0123168
YNL339W-A	64.611	-0.50205	0.160363	-3.13071	0.00174387	0.0123168
YPL283W-A	64.611	-0.50205	0.160363	-3.13071	0.00174387	0.0123168
YLL018C-A	393.739	0.322621	0.103065	3.13027	0.00174647	0.0123216
YDR040C	2874.29	0.320961	0.102564	3.12938	0.00175174	0.0123451
YJR053W	158.403	0.4177	0.1335	3.12885	0.00175492	0.012354
YDL078C	2638.33	0.253908	0.0811809	3.12768	0.0017619	0.0123894
YOR126C	322.133	-0.358463	0.114703	-3.12513	0.00177724	0.0124836
YDL174C	3999.01	0.297856	0.0953607	3.12347	0.00178732	0.0125407
YOR204W	837.162	0.322028	0.103121	3.12283	0.00179124	0.0125544
YCR003W	643.457	-0.296406	0.0949563	-3.1215	0.00179933	0.0125973
YGL180W	371.592	-0.330576	0.105955	-3.11996	0.00180876	0.0126356
YKR028W	654.222	-0.290904	0.0932368	-3.12006	0.00180815	0.0126356
YNL176C	1136.44	-0.298098	0.0957026	-3.11483	0.00184048	0.0128432
YGL171W	723.388	0.323593	0.103929	3.1136	0.0018482	0.012883
YMR048W	431.821	0.31659	0.10179	3.11024	0.00186934	0.0130162
YDR524W-C	5708.28	-0.27183	0.0874404	-3.10875	0.00187883	0.013068
YNL272C	793.655	0.272818	0.0877764	3.1081	0.00188293	0.0130824
YIR036C	772.552	0.277546	0.089309	3.10771	0.00188544	0.0130856
YBR129C	767.083	-0.320824	0.103351	-3.1042	0.00190794	0.0132274
YER133W	4756.11	-0.250779	0.0808239	-3.10278	0.00191713	0.0132767
YJR074W	833.381	0.350904	0.113247	3.09857	0.00194458	0.0134523
YMR309C	1039.1	-0.289442	0.09343	-3.09795	0.00194861	0.0134656
YER027C	829.67	0.274853	0.0888214	3.09445	0.00197181	0.0136113
YFL066C	135.1	-0.419021	0.135466	-3.09318	0.00198026	0.0136549
YNL233W	555.916	0.294867	0.095379	3.09153	0.00199126	0.0137159
YOR135C	1072.14	-0.277962	0.0899527	-3.09009	0.00200099	0.0137681
YNL174W	745.169	0.335638	0.10863	3.08973	0.00200338	0.0137698
YBR065C	323.09	0.333848	0.108125	3.08762	0.00201765	0.0138529
YLR291C	728.505	-0.289554	0.0938063	-3.08672	0.00202376	0.01388
YNL047C	297.288	-0.344997	0.1118	-3.08584	0.00202977	0.0139063
YKL185W	1040.34	-0.301773	0.0979179	-3.0819	0.00205686	0.0140648
YKR051W	475.038	-0.304325	0.0987481	-3.08183	0.0020573	0.0140648
YLR153C	5203.75	0.289775	0.0940632	3.08064	0.00206553	0.014106
YDR143C	566.49	-0.292095	0.0948562	-3.07935	0.00207456	0.0141526
YAL061W	1522.5	0.359376	0.116757	3.07799	0.00208404	0.0142021
YER178W	4296.08	0.269359	0.0875487	3.07668	0.00209323	0.0142344
YPR034W	610.897	0.290491	0.0944144	3.07677	0.0020926	0.0142344
YBR076W	193.332	-0.407857	0.132631	-3.07512	0.00210418	0.0142483
YGL123C-A	21002.5	-0.257272	0.0836577	-3.0753	0.00210293	0.0142483
YMR063W	120.657	0.424438	0.138003	3.07557	0.002101	0.0142483
YOL133W	613.473	0.303638	0.0987291	3.07547	0.00210174	0.0142483
YBR226C	53.9208	-0.511122	0.166319	-3.07314	0.00211818	0.0143156
YLR100W	2812.41	0.248495	0.0808616	3.07308	0.00211859	0.0143156
YOL111C	1218.21	0.252972	0.0823337	3.07252	0.00212258	0.0143274
YBR297W	395.029	-0.359526	0.117036	-3.07194	0.00212676	0.0143405
YMR242C	24169.1	-0.355401	0.115706	-3.0716	0.00212916	0.0143416
YIL071W-A	213.191	-0.372848	0.121427	-3.07055	0.00213668	0.014362
YJR139C	5763.01	0.234574	0.0763941	3.07058	0.00213641	0.014362
YOL097C	2203.33	0.255693	0.0832917	3.06986	0.00214162	0.0143801
YPR010C	1142.4	0.29723	0.0968374	3.06937	0.00214508	0.0143882
YGL128C	265.865	0.345753	0.112695	3.06804	0.0021547	0.0144376
YDR379C-A	310.928	0.347468	0.11329	3.06706	0.00216172	0.0144695
YOR377W	311.959	-0.334795	0.109222	-3.06528	0.00217466	0.0145409
YDR423C	1104.39	0.259161	0.0845725	3.06437	0.00218132	0.0145423
YKR099W	247.42	-0.384624	0.125517	-3.06432	0.00218169	0.0145423
YOR115C	1148.27	0.29672	0.0968287	3.06438	0.00218119	0.0145423
YMR119W-A	99.6759	-0.444688	0.145218	-3.06222	0.00219702	0.0146293
YDR157W	125.394	-0.4574	0.14963	-3.05687	0.00223658	0.0148618
YLR131C	239.149	-0.369823	0.12097	-3.05714	0.00223457	0.0148618
YHR088W	1800.13	0.260957	0.085517	3.05152	0.00227688	0.0150982
YPR153W	94.6451	0.450414	0.14759	3.0518	0.00227472	0.0150982
YEL021W	3707.63	-0.240637	0.0789101	-3.04951	0.00229214	0.0151837
YBR066C	522.107	-0.313551	0.102867	-3.04814	0.00230266	0.0152376
YMR134W	637.005	0.288575	0.094688	3.04764	0.00230643	0.0152467
YBR046C	1164.75	0.278012	0.0912518	3.04664	0.00231414	0.0152819
YOR293W	24532	-0.340779	0.111939	-3.04433	0.00233198	0.0153838
YMR293C	200.777	-0.37518	0.123285	-3.04318	0.00234089	0.0154267
YER156C	1729.11	-0.254701	0.0837893	-3.03978	0.00236754	0.0155863
YKR009C	885.859	0.29129	0.0958521	3.03896	0.002374	0.0156128
YGR279C	4264.55	0.256143	0.0843235	3.03762	0.00238451	0.0156658
YJL128C	650.335	-0.28733	0.0946176	-3.03675	0.00239143	0.0156952
YOR323C	2811.4	0.232676	0.0766284	3.03642	0.00239407	0.0156963
YDR255C	908.768	0.283508	0.0934009	3.03539	0.00240228	0.015718
YGR202C	1175.12	0.290797	0.0957944	3.03564	0.00240026	0.015718
YOL134C	377.59	0.322603	0.106302	3.03479	0.002407	0.0157328
YLR138W	1037.26	-0.274538	0.0905337	-3.03245	0.0024258	0.0158395
YIL060W	283.725	-0.363402	0.119861	-3.03186	0.00243055	0.0158527
YLR142W	1401	0.324778	0.107143	3.03127	0.00243526	0.0158527
YPL070W	813.995	-0.289685	0.0955578	-3.03151	0.00243331	0.0158527
YKL047W	499.021	-0.299108	0.098715	-3.03001	0.00244543	0.0159027
YLR085C	670.225	0.280501	0.0926294	3.0282	0.00246012	0.015982
YML115C	974.776	-0.275849	0.0911462	-3.02644	0.00247448	0.0160591
YCR006C	166.412	0.38596	0.127612	3.02448	0.00249059	0.0161472
YDR068W	1719.64	0.251746	0.0832766	3.02301	0.00250275	0.0162096
YDL007W	4344.52	0.227698	0.0753343	3.0225	0.00250695	0.0162204
YLR440C	627.943	0.279595	0.0925204	3.02198	0.00251126	0.0162319
YBR020W	16919.5	-0.246312	0.0815407	-3.02073	0.00252169	0.0162501
YML043C	35.2358	0.542583	0.179612	3.02086	0.00252059	0.0162501
YML018C	109.305	-0.426444	0.141168	-3.02083	0.00252087	0.0162501
YNL024C	120.963	-0.42882	0.142076	-3.01824	0.00254247	0.0163675
YDR373W	980.547	-0.315962	0.104761	-3.01601	0.00256123	0.0164717
YGL014W	490.797	-0.332388	0.110402	-3.01071	0.0026064	0.0167453
YDR250C	23.2367	-0.55845	0.185758	-3.00634	0.00264416	0.0169709
YOL010W	500.958	-0.29536	0.0982714	-3.00555	0.00265097	0.0169976
YNL079C	8894.96	0.228284	0.0759759	3.00469	0.00265854	0.017029
YBR098W	300.389	0.324766	0.108127	3.00356	0.0026684	0.0170751
YBR294W	255.985	-0.353273	0.117674	-3.00213	0.00268098	0.0171305
YFL030W	831.559	-0.309757	0.103185	-3.00197	0.00268242	0.0171305
YLR303W	1690.94	-0.273519	0.0911635	-3.00032	0.00269698	0.0172064
YGL041W-A	836.826	0.264747	0.088296	2.9984	0.002714	0.0172673
YHR137C-A	86.1327	0.467743	0.156001	2.99833	0.00271463	0.0172673
YOL126C	1245.13	-0.30531	0.101807	-2.99891	0.00270947	0.0172673
YDR327W	1754.2	0.231906	0.0773676	2.99745	0.00272247	0.0173
YBR295W	447.428	-0.302544	0.100965	-2.99651	0.00273087	0.0173361
YDR035W	5917.15	-0.22558	0.0752989	-2.99579	0.00273735	0.0173396
YDR053W	166.527	0.379145	0.126576	2.9954	0.00274083	0.0173396
YPL273W	2925.12	-0.250932	0.0837768	-2.99524	0.00274225	0.0173396
YPR120C	290.796	0.353759	0.118084	2.99583	0.00273702	0.0173396
YMR107W	2583	0.297787	0.0994389	2.99467	0.0027474	0.017355
YKR065C	1061.57	0.251789	0.0841016	2.99387	0.00275463	0.0173835
YNL115C	850.778	-0.278483	0.0930644	-2.99237	0.0027682	0.0174519
YDR286C	205.428	-0.394707	0.132022	-2.98972	0.00279237	0.0175697
YGR149W	992.496	-0.255777	0.0855478	-2.98987	0.00279098	0.0175697
YDL226C	1049.87	-0.266884	0.0894669	-2.98304	0.00285399	0.0179397
YIL107C	1096.16	-0.262938	0.0881749	-2.98201	0.00286366	0.0179829
YIR017C	124.559	-0.433394	0.145356	-2.9816	0.00286743	0.0179889
YNL134C	2839.08	-0.356343	0.119571	-2.98018	0.00288083	0.0180553
YDR142C	462.653	-0.296188	0.0994325	-2.97878	0.00289395	0.0181197
YBR259W	250.658	-0.337062	0.113171	-2.97835	0.00289801	0.0181275
YPL190C	1756.1	0.305557	0.102626	2.97738	0.00290725	0.0181675
YEL001C	2191.54	-0.271324	0.0911785	-2.97575	0.00292277	0.0182132
YKL156W	3178.6	-0.303893	0.102112	-2.97607	0.00291972	0.0182132
YKL096C-B	16.5654	-0.552791	0.185768	-2.97571	0.00292311	0.0182132
YDR239C	486.629	0.288032	0.0968469	2.9741	0.00293851	0.0182914
YGR253C	3624.59	0.259594	0.0873983	2.97024	0.00297567	0.0185047
YER162C	825.257	0.331073	0.111478	2.96985	0.00297942	0.01851
YDR039C	2250.34	0.301335	0.101498	2.96887	0.00298896	0.0185333
YER023W	3286.89	0.234469	0.0789686	2.96914	0.00298635	0.0185333
YLR307C-A	88.1781	-0.457708	0.154264	-2.96704	0.00300679	0.0186078
YNL141W	1341.9	-0.248811	0.0838581	-2.96705	0.00300672	0.0186078
YDR394W	2767.96	0.248113	0.0836942	2.96451	0.00303161	0.0187433
YNL135C	10222	0.25704	0.0867253	2.96384	0.00303824	0.0187661
YBR231C	247.294	0.337835	0.114079	2.96141	0.00306239	0.0188788
YLR436C	488.578	-0.30895	0.104318	-2.96161	0.00306037	0.0188788
YDR485C	1034.78	0.301276	0.101765	2.9605	0.0030714	0.0189162
YJL011C	131.646	-0.430236	0.14537	-2.95959	0.00308052	0.0189541
YLR420W	2842.66	0.234251	0.0792057	2.9575	0.00310146	0.0190646
YOL005C	948.063	-0.292188	0.0989206	-2.95376	0.0031393	0.0192787
YCL027W	114.423	-0.42063	0.142506	-2.95166	0.00316073	0.0193917
YIR017W-A	125.136	-0.429265	0.145467	-2.95095	0.00316798	0.0194175
YDL206W	403.191	-0.33406	0.113394	-2.94602	0.0032189	0.0197108
YEL036C	543.263	-0.297981	0.101214	-2.94406	0.00323941	0.0197607
YER015W	558.42	0.301543	0.102416	2.94429	0.00323701	0.0197607
YKL078W	148.414	0.386319	0.131197	2.94457	0.00323408	0.0197607
YOR230W	3517.29	0.284511	0.0966265	2.94445	0.00323534	0.0197607
YBL086C	1741.5	0.2668	0.0906588	2.9429	0.00325151	0.0198156
YAL012W	1325.53	0.261902	0.0890371	2.94149	0.00326639	0.0198873
YLR454W	1119.98	0.251784	0.0856229	2.94061	0.00327564	0.0199247
YGL065C	669.852	0.279765	0.0951722	2.93957	0.00328672	0.0199645
YLR333C	6213.04	-0.297908	0.10135	-2.93941	0.00328842	0.0199645
YDR371W	420.423	-0.301444	0.10261	-2.93777	0.00330586	0.0200098
YLR209C	1247.84	0.23959	0.0815496	2.93797	0.00330365	0.0200098
YMR198W	255.676	0.344184	0.117146	2.93808	0.00330254	0.0200098
YOL054W	545.299	0.289842	0.0986687	2.93753	0.00330838	0.0200098
YDR350C	607.048	-0.290498	0.0989144	-2.93687	0.00331546	0.0200148
YJR111C	479.621	-0.283024	0.0963662	-2.93697	0.00331441	0.0200148
YJL200C	4404.25	0.246656	0.0840083	2.93609	0.00332376	0.0200459
YOR121C	787.016	-0.277662	0.0947453	-2.93061	0.00338294	0.0203836
YNL177C	1401.45	-0.241785	0.0825326	-2.92957	0.00339426	0.0204326
YDR280W	887.191	-0.254353	0.0868448	-2.92882	0.00340253	0.0204631
YMR204C	349.363	0.304623	0.10409	2.92653	0.00342762	0.0205947
YMR085W	504.84	-0.369569	0.126299	-2.92614	0.00343193	0.0206012
YFL010C	1834.07	0.234825	0.080286	2.92485	0.00344619	0.0206674
YHR142W	1259.9	-0.250547	0.0856765	-2.92434	0.00345185	0.020682
YMR076C	456.451	0.307366	0.105146	2.92324	0.00346411	0.0207361
YOR188W	355.46	0.301018	0.103117	2.9192	0.00350928	0.0209868
YJR130C	1547.96	-0.250076	0.0856765	-2.91884	0.00351338	0.0209917
YBR290W	1436.81	-0.234637	0.0805445	-2.91314	0.00357819	0.021359
YPL079W	12664.8	-0.306347	0.105177	-2.91269	0.00358336	0.0213699
YIL169C	2021.43	0.286115	0.098527	2.90392	0.00368521	0.0219569
YGR286C	610.752	0.264838	0.0912181	2.90335	0.00369198	0.0219767
YDL126C	7764.51	0.264947	0.0913452	2.9005	0.00372568	0.0221567
YDR455C	83.4557	0.441577	0.152314	2.89912	0.00374216	0.0222341
YDL092W	1424.9	-0.278427	0.0961625	-2.89538	0.003787	0.0224796
YGL209W	267.296	-0.318732	0.11014	-2.89387	0.0038052	0.0225464
YPL146C	1280.77	0.277145	0.0957697	2.89387	0.0038053	0.0225464
YDL045W-A	407.887	-0.310847	0.10745	-2.89295	0.00381646	0.0225916
YDR384C	1368.09	-0.250307	0.0866587	-2.88842	0.00387182	0.0228977
YNL281W	1286.26	0.312319	0.108138	2.88814	0.00387532	0.0228977
YDR129C	7366.01	0.260375	0.0901829	2.88719	0.00388704	0.0229246
YKR054C	583.803	0.271258	0.0939435	2.88746	0.00388366	0.0229246
YOR298C-A	7709.8	0.264359	0.0915733	2.88686	0.0038911	0.0229274
YHR200W	1767.99	0.227815	0.0789404	2.88591	0.00390287	0.0229756
YOR008C	1426.77	-0.263861	0.0914664	-2.88479	0.00391678	0.0230363
YKR093W	341.449	0.324874	0.112668	2.88345	0.00393339	0.0231128
YIL009C-A	718.981	0.257431	0.0893525	2.88107	0.00396322	0.0232667
YKR039W	7307.75	0.269544	0.0935965	2.87985	0.00397869	0.0233361
YDR025W	14826.9	-0.294175	0.102194	-2.87858	0.0039947	0.0233997
YJR048W	5362.95	0.299278	0.103973	2.87841	0.00399686	0.0233997
YDR526C	161.05	0.382905	0.133047	2.87798	0.00400237	0.0234105
YGR280C	1537.37	0.298095	0.103668	2.87547	0.00403427	0.0235756
YLR380W	533.77	0.280052	0.0974295	2.8744	0.0040479	0.0236337
YLR294C	1760.8	-0.250942	0.0873134	-2.87404	0.00405256	0.0236393
YBR039W	3962.04	-0.21905	0.0762545	-2.87261	0.00407091	0.0237247
YNL148C	332.741	0.303954	0.105824	2.87226	0.00407543	0.0237295
YJL099W	843.77	-0.25764	0.0897158	-2.87174	0.00408218	0.0237472
YDR062W	1107.52	-0.243738	0.0849512	-2.86915	0.00411575	0.0239207
YPR063C	1693.73	0.227625	0.0793452	2.8688	0.00412036	0.0239258
YPR016W-A	173.119	-0.372388	0.129841	-2.86804	0.00413027	0.0239616
YPR020W	2504.35	-0.298766	0.104197	-2.86732	0.0041396	0.0239939
YER079C-A	248.894	0.343281	0.119763	2.86633	0.00415258	0.0240134
YGR090W	617.002	0.278665	0.0972244	2.86621	0.00415422	0.0240134
YOR361C	3782.64	0.227638	0.0794208	2.86623	0.00415398	0.0240134
YDL065C	1260.2	0.269309	0.0940189	2.86441	0.00417782	0.0241063
YPL263C	839.862	0.275399	0.0961434	2.86446	0.00417727	0.0241063
YBR116C	98.7741	0.427595	0.149329	2.86344	0.00419074	0.0241534
YCL002C	355.091	-0.301139	0.105175	-2.86322	0.00419353	0.0241534
YHR025W	1784.82	0.221435	0.077357	2.86251	0.00420306	0.0241865
YOL124C	297.922	-0.333316	0.116454	-2.86221	0.00420701	0.0241875
YMR213W	531.226	0.300465	0.105001	2.86154	0.00421587	0.0242167
YCR047C	969.219	0.258036	0.0902284	2.85981	0.00423889	0.0243053
YLR382C	483.811	0.29264	0.102323	2.85996	0.00423693	0.0243053
YHR056W-A	126.577	0.385481	0.134822	2.85919	0.00424726	0.0243314
YIL096C	367.798	-0.337299	0.118031	-2.85772	0.00426691	0.0244222
YBR025C	10003	0.222614	0.0779286	2.85664	0.0042815	0.0244838
YNL304W	275.518	0.319005	0.111706	2.85577	0.00429325	0.024529
YGL019W	1878.18	0.231284	0.0810732	2.85278	0.00433386	0.0247389
YLR412W	921.608	0.243483	0.085404	2.85096	0.0043588	0.0248592
YGR234W	17945.9	-0.265406	0.0931349	-2.84969	0.00437617	0.0249282
YMR211W	490.806	0.293152	0.102881	2.84944	0.00437968	0.0249282
YMR267W	867.728	0.249496	0.0875663	2.84922	0.0043826	0.0249282
YBL102W	1365.57	-0.234284	0.0823146	-2.84621	0.00442437	0.0251435
YIL068C	982.139	0.252173	0.0887367	2.84181	0.00448578	0.0254698
YHR182W	367.173	0.301414	0.106083	2.84129	0.0044931	0.0254888
YOL118C	362.314	-0.374951	0.132087	-2.83867	0.00453022	0.0256766
YDR478W	376.029	0.302434	0.106616	2.83666	0.00455879	0.0258157
YER054C	590.551	-0.31319	0.11049	-2.83457	0.00458879	0.0259626
YER048C	2735.35	0.230552	0.0814084	2.83204	0.00462519	0.0261223
YOL040C	42767.7	-0.298323	0.10533	-2.83228	0.0046218	0.0261223
YPL170W	871.553	-0.298956	0.105588	-2.83133	0.00463542	0.026157
YDL103C	926.404	0.247771	0.0875292	2.83072	0.00464436	0.0261844
YDL238C	358.208	-0.307679	0.108739	-2.82952	0.00466173	0.0262592
YPR195C	92.0242	-0.420401	0.148605	-2.82898	0.00466966	0.0262807
YDR133C	10521.3	0.216103	0.0764964	2.82501	0.00472794	0.026569
YPR162C	625.212	0.257971	0.0913197	2.82492	0.00472919	0.026569
YAL007C	1201.11	-0.280702	0.0994203	-2.82339	0.00475186	0.0266495
YGR161W-C	1437.42	0.277984	0.0984553	2.82346	0.00475087	0.0266495
YGL059W	2036.43	-0.228511	0.0809897	-2.82149	0.00478014	0.0267847
YGL129C	762.723	0.271471	0.0962517	2.82043	0.00479599	0.02685
YBL113W-A	114.868	-0.392786	0.139319	-2.81932	0.00481256	0.0269192
YOR387C	38.9971	-0.523073	0.185726	-2.81637	0.00485699	0.027144
YGL027C	1089.98	0.239609	0.0851383	2.81436	0.00488751	0.027267
YPL242C	724.905	-0.247479	0.0879332	-2.8144	0.00488682	0.027267
YDR324C	592.997	0.27782	0.0987649	2.81294	0.00490912	0.0273636
YMR038C	1265.2	-0.252903	0.0899336	-2.8121	0.00492187	0.0274108
YGL189C	49043.1	-0.298835	0.106397	-2.80869	0.00497434	0.0276576
YJR119C	188.106	-0.350257	0.124706	-2.80866	0.00497482	0.0276576
YDR446W	19.2466	-0.519749	0.185077	-2.80829	0.00498061	0.0276593
YOR170W	81.8805	-0.434447	0.154713	-2.80808	0.00498378	0.0276593
YGL121C	500.512	-0.328084	0.116912	-2.80625	0.00501211	0.0277924
YML070W	1704.05	0.27054	0.096485	2.80396	0.00504785	0.0279515
YPL037C	8502.3	-0.283163	0.100991	-2.80386	0.00504954	0.0279515
YNR044W	230.509	-0.343322	0.122485	-2.80298	0.00506335	0.0280038
YFL031C-A	531.797	-0.265055	0.0945888	-2.80218	0.00507584	0.0280484
YNL296W	237.465	0.33682	0.120214	2.80184	0.00508117	0.0280484
YPR009W	307.198	-0.316312	0.112903	-2.80163	0.00508456	0.0280484
YJL093C	631.221	-0.266106	0.0950008	-2.8011	0.00509293	0.0280703
YCR041W	79.798	0.428498	0.152995	2.80073	0.00509865	0.0280777
YAL009W	296.843	-0.310496	0.11102	-2.79676	0.00516182	0.0284011
YCR033W	1359.2	0.286414	0.10243	2.79619	0.00517092	0.0284267
YOR293C-A	33.8349	-0.504921	0.180596	-2.79587	0.00517608	0.0284307
YMR029C	1918.03	0.226362	0.081012	2.79417	0.00520328	0.0285555
YNR026C	367.108	0.290334	0.104022	2.79108	0.00525326	0.0288051
YGL004C	846.824	0.247403	0.0886902	2.78951	0.00527873	0.02892
YJL177W	8596.56	-0.264194	0.0947286	-2.78896	0.00528784	0.0289204
YKR084C	1006.12	0.246046	0.0882175	2.78909	0.0052857	0.0289204
YPL206C	1298.29	0.238793	0.0856539	2.78788	0.00530541	0.0289733
YPL119C-A	24.9746	-0.515507	0.184915	-2.78781	0.00530657	0.0289733
YDL237W	1288.15	0.233909	0.0839137	2.78749	0.00531174	0.0289768
YLR225C	846.967	-0.257357	0.0923809	-2.78582	0.00533926	0.0291022
YIL112W	2259.8	0.213231	0.0765996	2.78371	0.00537414	0.0292673
YML077W	299.895	-0.313947	0.112864	-2.78165	0.00540841	0.0294289
YOL052C-A	1976.92	-0.276427	0.0994821	-2.77866	0.00545839	0.0296756
YOR041C	566.764	0.276322	0.0994772	2.77774	0.00547386	0.0297345
YOR386W	1174.46	0.264407	0.0951981	2.77744	0.00547894	0.0297369
YOR001W	1008.3	0.236081	0.085028	2.7765	0.00549472	0.0297972
YKL123W	195.017	-0.339822	0.122406	-2.7762	0.00549991	0.0298001
YLR183C	421.793	0.302899	0.109151	2.77505	0.00551927	0.0298797
YIL015W	412.569	-0.285205	0.102789	-2.77467	0.00552579	0.0298897
YPL069C	185.214	-0.362702	0.130833	-2.77225	0.00556703	0.0300873
YNL073W	724.692	-0.263152	0.0949553	-2.77133	0.00558278	0.030147
YGR052W	602.882	-0.272412	0.0983471	-2.7699	0.00560731	0.0302358
YPR024W	1469.93	0.250013	0.0902632	2.76982	0.00560867	0.0302358
YDL082W	11165.4	-0.269594	0.0973552	-2.76918	0.00561982	0.030245
YER095W	660.983	0.300206	0.108408	2.76923	0.00561889	0.030245
YHL050W-A	103.8	-0.40628	0.146748	-2.76855	0.00563059	0.0302775
YDR225W	15048.2	0.22917	0.0827893	2.76811	0.00563825	0.0302836
YDR315C	218.462	-0.340701	0.123101	-2.76767	0.00564594	0.0302836
YLR212C	320.034	0.297307	0.10742	2.7677	0.00564529	0.0302836
YPL271W	2828.61	-0.287553	0.103921	-2.76703	0.00565703	0.0303177
YPR160W-A	171.38	0.385251	0.139257	2.76647	0.00566672	0.0303442
YDL202W	408.11	-0.295602	0.107173	-2.75817	0.00581264	0.0310736
YDR098C	2134.85	0.225939	0.0819102	2.75838	0.00580891	0.0310736
YLR262C-A	2356.15	-0.26812	0.0972379	-2.75736	0.00582697	0.031122
YMR093W	173.535	-0.345872	0.125447	-2.75711	0.00583143	0.031122
YOR067C	462.361	-0.291453	0.105753	-2.75598	0.00585174	0.0312044
YOR096W	19614.1	-0.264817	0.0961749	-2.7535	0.00589624	0.0314155
YOR227W	1017.65	-0.262736	0.0954883	-2.75149	0.00593241	0.031582
YDL180W	609.918	-0.259804	0.094494	-2.74942	0.0059701	0.0317562
YER070W	321.529	0.358859	0.130641	2.7469	0.00601619	0.0319747
YMR146C	7029.24	0.200177	0.0728874	2.74638	0.00602563	0.0319984
YOL144W	838.268	0.246438	0.089924	2.74051	0.00613437	0.0325218
YPR185W	516.083	-0.289616	0.105674	-2.74065	0.00613176	0.0325218
YMR159C	218.85	0.331478	0.121014	2.73918	0.00615931	0.032627
YDL160C-A	428.489	0.321177	0.117296	2.73818	0.00617801	0.0326553
YDR050C	42131.6	0.210759	0.0769698	2.73821	0.00617748	0.0326553
YOR354C	672.29	0.249572	0.0911488	2.73808	0.00617996	0.0326553
YJL005W	1082.51	0.247653	0.0906435	2.73216	0.00629198	0.0332198
YOR220W	3468.02	-0.207323	0.0758924	-2.73181	0.00629881	0.0332284
YJR020W	101.402	0.398963	0.146073	2.73126	0.00630921	0.0332439
YOL151W	769.889	-0.31041	0.113657	-2.73111	0.00631213	0.0332439
YLR164W	200.65	-0.328185	0.120215	-2.72998	0.00633374	0.0333303
YOR297C	428.076	-0.293257	0.107475	-2.72862	0.00636004	0.0334412
YGL039W	290.187	-0.295905	0.108497	-2.72731	0.00638537	0.0335468
YER150W	1411.76	0.254685	0.0934115	2.72649	0.00640127	0.0336028
YIL017C	806.918	-0.250195	0.0917857	-2.72585	0.00641354	0.0336395
YMR258C	516.194	-0.26986	0.0990167	-2.72539	0.00642249	0.0336589
YKL006W	12420.3	-0.295264	0.108383	-2.72425	0.00644468	0.0337475
YBR055C	598.675	0.251788	0.092482	2.72256	0.00647784	0.0338934
YLR257W	10881.2	-0.209721	0.0770563	-2.72166	0.00649558	0.0339585
YBL065W	54.6135	0.458711	0.1686	2.72071	0.00651419	0.0340193
YBR086C	1764.53	-0.216669	0.0796424	-2.72052	0.00651784	0.0340193
YDR539W	696.108	0.267851	0.0984678	2.72019	0.00652452	0.0340264
YDL188C	729.113	-0.248544	0.0914639	-2.7174	0.00657979	0.0342867
YDR431W	18.2102	0.505886	0.186202	2.71687	0.0065902	0.034313
YNR028W	728.845	-0.24497	0.0901848	-2.71631	0.00660145	0.0343436
YNL136W	1189.54	0.248449	0.0914801	2.71589	0.00660988	0.0343596
YNL300W	343.376	-0.283496	0.104412	-2.71516	0.00662434	0.0344068
YDR141C	879.434	0.235769	0.0868686	2.71408	0.00664593	0.0344909
YGR196C	641.882	0.26759	0.0986123	2.71356	0.00665643	0.0345174
YGL056C	564.295	-0.282524	0.104342	-2.70768	0.00677559	0.0351069
YOR341W	1128.29	0.263882	0.0975397	2.70538	0.00682271	0.0353224
YMR158W-B	217.494	0.327968	0.12125	2.7049	0.00683259	0.035345
YBL061C	599.173	-0.255641	0.0945592	-2.7035	0.00686132	0.0354628
YNL103W	924.335	-0.255646	0.0945696	-2.70325	0.00686644	0.0354628
YOR033C	433.032	0.266038	0.0985882	2.69848	0.00696578	0.0359468
YGR220C	1018.93	-0.287863	0.1067	-2.69787	0.00697857	0.0359838
YDR467C	120.062	-0.388427	0.144	-2.69741	0.00698811	0.0360039
YJR007W	2833.65	-0.254637	0.0944313	-2.69653	0.0070066	0.0360702
YBR249C	9571.89	0.218342	0.0809877	2.69599	0.007018	0.0360708
YGR190C	167.961	-0.351342	0.130318	-2.69603	0.00701703	0.0360708
YDL105W	202.999	0.32569	0.120872	2.69451	0.00704923	0.0362023
YIR037W	2107.11	0.240528	0.0892908	2.69376	0.007065	0.0362542
YBR168W	272.903	-0.301909	0.112136	-2.69235	0.00709504	0.0363138
YDL177C	153.634	-0.357544	0.132785	-2.69264	0.0070888	0.0363138
YDL044C	304.668	0.299275	0.111166	2.69215	0.00709932	0.0363138
YGR277C	377.92	-0.298524	0.110863	-2.69274	0.00708685	0.0363138
YDR383C	549.546	0.259609	0.0964748	2.69095	0.00712479	0.036415
YCR037C	886.757	0.241634	0.0898044	2.69067	0.00713086	0.0364169
YPL111W	4534.43	0.266021	0.0988877	2.69013	0.00714244	0.0364469
YHR138C	4099.31	-0.260918	0.097029	-2.68907	0.00716507	0.0365241
YJR049C	937.109	0.235922	0.0877395	2.68889	0.00716897	0.0365241
YER002W	2686.17	0.220129	0.0819067	2.68756	0.00719754	0.0366405
YER113C	255	-0.302055	0.112403	-2.68725	0.00720438	0.0366461
YBR038W	235.21	-0.31431	0.117021	-2.68593	0.00723274	0.036732
YEL053C	303.636	-0.295884	0.110156	-2.68604	0.00723047	0.036732
YGL170C	45.8474	-0.465567	0.17344	-2.68431	0.00726795	0.0368815
YLR014C	126.456	0.364014	0.135657	2.68334	0.00728907	0.0369594
YER012W	2160.03	0.223931	0.0834709	2.68275	0.00730201	0.0369903
YJR140C	397.52	0.279446	0.104172	2.68253	0.00730673	0.0369903
YML010W	1469.15	0.261917	0.0976806	2.68136	0.00733225	0.0370902
YDR527W	558.728	0.253215	0.0944469	2.68103	0.00733949	0.0370975
YIL128W	368.687	-0.294568	0.109937	-2.67942	0.00737509	0.037248
YDR450W	22531.6	-0.275997	0.103037	-2.67862	0.00739271	0.0373075
YFL056C	84.8576	-0.424465	0.158961	-2.67025	0.00757944	0.0382197
YNL053W	333.433	-0.281138	0.105344	-2.66876	0.00761314	0.0383594
YLR050C	688.348	0.314296	0.117802	2.66799	0.00763067	0.0384175
YKL082C	838.246	0.268299	0.100611	2.66671	0.00765989	0.038504
YML095C	314.369	0.29918	0.112186	2.66682	0.00765724	0.038504
YLR017W	1226.12	0.218863	0.0821077	2.66556	0.00768606	0.0385764
YOR062C	895.775	-0.235617	0.0883935	-2.66555	0.00768633	0.0385764
YIR028W	157.903	-0.348051	0.130637	-2.66427	0.00771563	0.038693
YHR031C	321.695	0.289001	0.108557	2.6622	0.00776306	0.0389004
YBR225W	577.982	-0.266127	0.0999756	-2.66192	0.00776959	0.0389026
YJR152W	473.934	0.263435	0.0990186	2.66046	0.00780336	0.0390412
YDL097C	3305.9	0.234483	0.0881933	2.65874	0.00784333	0.0392105
YGL010W	341.335	-0.299323	0.112605	-2.65818	0.00785634	0.0392344
YNR020C	114.434	-0.388783	0.146268	-2.65801	0.00786037	0.0392344
YDR345C	5343.48	-0.248774	0.0936109	-2.65753	0.00787147	0.0392592
YDL089W	382.184	-0.271968	0.102386	-2.65629	0.00790056	0.0393453
YJR066W	835.963	0.25855	0.0973356	2.65627	0.00790103	0.0393453
YHR152W	517.836	-0.294684	0.111054	-2.65351	0.00796584	0.0396372
YPL025C	16.9386	-0.492615	0.185811	-2.65117	0.00802135	0.0398824
YGR083C	868.024	0.253661	0.0956983	2.65063	0.00803407	0.0399146
YER068W	921.113	0.244662	0.0923139	2.65032	0.00804145	0.0399203
YBL104C	320.816	0.282346	0.10657	2.6494	0.00806345	0.0399985
YDL085W	429.342	0.337282	0.127348	2.64851	0.00808475	0.040073
YDR448W	368.811	0.271833	0.102797	2.64436	0.00818454	0.0405363
YLR400W	93.2408	0.403675	0.152718	2.64328	0.0082108	0.0406349
YBL087C	10548.7	-0.313261	0.118595	-2.64142	0.00825583	0.0408262
YKL004W	585.309	-0.252114	0.0955163	-2.63948	0.00830327	0.041029
YGR109W-A	281.949	-0.290917	0.110475	-2.63332	0.00845543	0.0417272
YNL144W-A	88.3848	-0.412587	0.156685	-2.63323	0.0084576	0.0417272
YPL113C	407.9	0.283008	0.10749	2.63287	0.00846659	0.0417394
YGR167W	4352.78	-0.196885	0.0747949	-2.63233	0.00848026	0.0417746
YLR444C	53.8873	-0.440931	0.167634	-2.63031	0.00853063	0.0419904
YMR073C	590.498	-0.277806	0.105763	-2.62669	0.00862209	0.042408
YDL071C	31.4661	0.476424	0.181467	2.62541	0.00865449	0.042502
YMR220W	1220.33	0.23215	0.0884215	2.6255	0.0086523	0.042502
YGR276C	1033.47	0.226234	0.0861904	2.62481	0.00866967	0.0425439
YJL211C	282.59	-0.297613	0.113567	-2.62059	0.0087777	0.043041
YPR112C	927.936	0.234366	0.0894509	2.62006	0.00879155	0.0430759
YHR070W	438.168	0.277822	0.106062	2.61942	0.00880799	0.0431234
YBR148W	76.0014	-0.408676	0.156139	-2.61738	0.00886075	0.0433486
YER180C	273.863	-0.295694	0.113069	-2.61517	0.00891839	0.0435972
YFL021C-A	655.568	0.237988	0.0910942	2.61255	0.00898698	0.0438897
YKL049C	939.967	0.239564	0.0917042	2.61236	0.00899193	0.0438897
YGR111W	1121.55	0.219932	0.0842265	2.61119	0.00902274	0.0440049
YNL267W	1215.86	0.226145	0.0866144	2.61094	0.00902929	0.0440049
YHR207C	763.361	0.238232	0.0912973	2.60941	0.00906978	0.0441686
YDR193W	58.605	-0.426862	0.163611	-2.60901	0.00908045	0.0441869
YER053C-A	988.227	-0.287834	0.110365	-2.60801	0.00910693	0.0442149
YGR116W	2274.81	0.248137	0.095137	2.60821	0.0091017	0.0442149
YPR165W	6895.99	-0.203443	0.0780033	-2.60813	0.00910376	0.0442149
YGL070C	619.16	-0.267036	0.102415	-2.60739	0.00912352	0.0442619
YKL063C	813.873	-0.235198	0.090223	-2.60686	0.00913778	0.0442975
YLR309C	1032.25	0.275189	0.105602	2.6059	0.00916342	0.0443881
YPL107W	553.481	-0.245268	0.0941475	-2.60514	0.00918357	0.0444521
YBR061C	500.124	-0.255686	0.0982118	-2.60342	0.00922999	0.044643
YDR509W	219.166	0.318002	0.122251	2.60123	0.00928908	0.044889
YOR056C	1783.28	0.218164	0.0838819	2.60085	0.00929936	0.044889
YPL128C	157.162	-0.340549	0.130942	-2.60075	0.00930189	0.044889
YDR037W	7026.07	0.220689	0.0848842	2.59989	0.00932538	0.0449684
YGL029W	277.976	0.299505	0.115275	2.59819	0.00937174	0.0451542
YJR072C	1937.91	0.20824	0.0801554	2.59796	0.00937803	0.0451542
YER017C	561.166	-0.275194	0.105947	-2.59746	0.00939156	0.0451854
YIL069C	10188.5	-0.242871	0.0935214	-2.59696	0.00940535	0.0452178
YJL170C	183.892	-0.344498	0.132734	-2.5954	0.00944809	0.0453891
YEL059C-A	296.113	-0.317105	0.122252	-2.59387	0.00949025	0.0455233
YOR271C	696.032	0.26581	0.102475	2.5939	0.00948949	0.0455233
YDR540C	367.001	-0.278515	0.107453	-2.59198	0.00954256	0.0457399
YNL070W	708.034	-0.300148	0.115851	-2.59081	0.00957504	0.0458613
YHR161C	2404.06	0.232367	0.0897981	2.58766	0.00966308	0.0462484
YBR060C	443.389	0.27039	0.104556	2.58608	0.00970741	0.0463911
YMR012W	1623.86	0.237218	0.0917217	2.58629	0.00970165	0.0463911
YBL064C	2326.73	-0.228286	0.0883135	-2.58495	0.00973934	0.046509
YLR132C	361.882	0.28164	0.108991	2.58407	0.00976408	0.0465923
YIL130W	453.319	0.276757	0.107198	2.58173	0.0098307	0.0468753
YDR413C	1334.68	-0.238059	0.092308	-2.57897	0.00990967	0.0471815
YOR036W	2782.28	-0.208615	0.0808835	-2.5792	0.00990289	0.0471815
YOR372C	905.232	0.254141	0.0985591	2.57856	0.00992119	0.0472013
YCL026C-B	142.035	-0.351968	0.136512	-2.57828	0.00992924	0.0472044
YGR177C	169.448	-0.32701	0.126879	-2.57733	0.00995667	0.0472997
YJR057W	707.016	0.246469	0.0957153	2.57502	0.0100234	0.0475634
YLR101C	901.373	0.235503	0.0914701	2.57464	0.0100345	0.0475634
YOR356W	1334.88	0.239624	0.0930702	2.57466	0.010034	0.0475634
YBR049C	980.3	0.261255	0.101503	2.57385	0.0100573	0.047634
YGL041C	525.584	0.244638	0.0950562	2.57361	0.0100642	0.047634
YLR284C	833.943	0.26032	0.101219	2.57185	0.0101156	0.0478416
YNL268W	1385.98	-0.230925	0.0899468	-2.56735	0.010248	0.0484322
YIL008W	723.706	-0.260367	0.101434	-2.56686	0.0102623	0.048464
YPL093W	783.513	-0.242463	0.0944751	-2.56642	0.0102754	0.0484897
YML127W	492.677	-0.259417	0.101092	-2.56614	0.0102837	0.0484933
YBR035C	3014.55	0.204451	0.0797105	2.56492	0.01032	0.0485929
YDR042C	90.5148	-0.382541	0.149139	-2.565	0.0103177	0.0485929
YOL020W	762.33	-0.237805	0.0928058	-2.56239	0.0103953	0.0489116
YMR075C-A	66.4255	-0.409425	0.159858	-2.56119	0.0104315	0.0490458
YOR034C	391.947	-0.263802	0.10306	-2.55971	0.0104761	0.0492191
YMR114C	1208.1	0.221451	0.0865413	2.55891	0.0105002	0.0492962
YPL135W	2319.28	-0.202727	0.079234	-2.55859	0.0105098	0.0493054
YOL031C	508.238	-0.24813	0.0970578	-2.55651	0.0105727	0.0495638
YOR010C	99.2096	0.374734	0.146695	2.55451	0.0106337	0.0498135
YGR186W	2006.59	0.22243	0.0871673	2.55176	0.010718	0.0501714
YJL050W	573.985	0.269163	0.105538	2.55038	0.0107605	0.0503336
YEL061C	439.97	0.256593	0.100651	2.54933	0.0107931	0.0504493
YDR199W	164.572	-0.325882	0.12789	-2.54814	0.0108298	0.0505839
YGR054W	751.101	-0.229626	0.0902578	-2.54411	0.0109556	0.0511339
YBR143C	4458.89	-0.204475	0.0804269	-2.54237	0.0110105	0.0513242
YGL238W	887.333	0.231011	0.0908666	2.54231	0.0110124	0.0513242
YPL152W	640.65	0.246082	0.0968125	2.54184	0.0110272	0.0513558
YML026C	22766.4	-0.272616	0.107269	-2.54143	0.01104	0.0513781
YBR113W	453.871	0.256602	0.100978	2.54117	0.0110481	0.0513785
YBL077W	676.982	0.232514	0.0915134	2.54076	0.0110612	0.051402
YIR026C	895.905	0.215798	0.0849594	2.54001	0.0110848	0.0514743
YOL117W	555.817	0.242579	0.0955259	2.53941	0.0111041	0.0515247
YOR004W	712.014	0.253259	0.0997412	2.53916	0.0111117	0.0515247
YOL115W	335.555	0.283627	0.111729	2.53854	0.0111318	0.0515801
YKR026C	979.7	0.212374	0.0836701	2.53823	0.0111413	0.0515871
YHR069C	996.944	0.234973	0.0926781	2.53536	0.0112331	0.0519742
YBL035C	258.754	0.288058	0.113648	2.53464	0.0112563	0.0520262
YIL059C	321.484	-0.292423	0.115386	-2.5343	0.0112671	0.0520262
YFR011C	1106.98	-0.244161	0.0963475	-2.53417	0.0112714	0.0520262
YOR290C	1131.37	0.241098	0.0951453	2.534	0.0112768	0.0520262
YNR004W	237.493	-0.294484	0.116254	-2.5331	0.0113058	0.0521032
YOR239W	2330.26	0.218268	0.0861703	2.53298	0.0113098	0.0521032
YIL104C	245.904	0.301058	0.118875	2.53256	0.0113234	0.0521121
YFR009W	2299.25	0.220484	0.0870646	2.53241	0.011328	0.0521121
YER169W	377.68	-0.261202	0.103154	-2.53216	0.0113362	0.0521122
YPL143W	20426	-0.236706	0.0935572	-2.53007	0.011404	0.0523861
YLR019W	589.982	-0.253126	0.100082	-2.52917	0.0114331	0.0524825
YLR342W-A	17.5944	-0.470366	0.186035	-2.52837	0.0114593	0.0525648
YDR304C	4167.85	0.189129	0.0748675	2.52618	0.011531	0.0528561
YPL142C	20438.5	-0.235979	0.0934688	-2.52468	0.0115804	0.0530442
YKR081C	1297.12	-0.22908	0.0907885	-2.52322	0.0116285	0.0532265
YPL254W	287.786	-0.282231	0.112014	-2.51962	0.0117483	0.0537366
YFL057C	78.9052	-0.391342	0.155354	-2.51903	0.0117678	0.0537874
YKR080W	298.335	-0.273829	0.108759	-2.51776	0.0118102	0.0539427
YKR008W	772.229	0.2492	0.0990219	2.51661	0.0118489	0.0540808
YBL011W	659.598	-0.238079	0.0946927	-2.51423	0.0119294	0.0542932
YIL030W-A	30.2731	-0.459678	0.182817	-2.51442	0.011923	0.0542932
YER127W	306.981	0.287496	0.114314	2.51496	0.0119045	0.0542932
YGL193C	145.559	-0.337044	0.134052	-2.51428	0.0119277	0.0542932
YNR051C	519.622	-0.321489	0.127889	-2.51382	0.0119431	0.0543169
YDR357C	1108.46	-0.23747	0.0945445	-2.51173	0.0120141	0.0546008
YGR205W	1054.16	-0.232642	0.0926447	-2.51112	0.0120348	0.0546565
YIR025W	412.115	0.258156	0.102833	2.51045	0.0120579	0.0546834
YHR099W	1147.73	0.206984	0.0824485	2.51046	0.0120573	0.0546834
YER046W	335.579	-0.278375	0.111009	-2.50767	0.0121529	0.0550753
YJL014W	2388.69	0.204642	0.081619	2.50729	0.0121661	0.0550963
YGR156W	315.074	0.276898	0.110573	2.50421	0.0122724	0.0554681
YHR199C-A	116.639	0.347606	0.1388	2.50436	0.0122673	0.0554681
YNR035C	3277.45	0.192905	0.0770337	2.50416	0.0122742	0.0554681
YPL251W	156.733	-0.318968	0.127515	-2.50142	0.0123695	0.0558593
YJL010C	586.774	0.252555	0.100979	2.50105	0.0123825	0.0558784
YDL034W	110.4	0.376358	0.150511	2.50053	0.0124008	0.0558978
YIL156W	517.975	0.242372	0.096932	2.50043	0.0124043	0.0558978
YMR266W	1543.88	-0.207396	0.0829961	-2.49886	0.0124592	0.0561059
YNL160W	2470.12	-0.278591	0.111556	-2.49732	0.0125135	0.0563108
YOR176W	2201.85	0.191339	0.0766581	2.49601	0.0125598	0.0564796
YBR001C	746.48	0.251453	0.100784	2.49496	0.012597	0.0565275
YDR079C-A	289.536	0.312999	0.125439	2.49523	0.0125876	0.0565275
YGR030C	371.791	-0.275544	0.110433	-2.49514	0.0125909	0.0565275
YBL039C	699.127	-0.243451	0.0976174	-2.49393	0.0126338	0.056653
YGR214W	18639.5	-0.186105	0.0747003	-2.49135	0.0127258	0.0570256
YML061C	371.037	0.266922	0.10721	2.48971	0.0127849	0.0572502
YMR042W	530.303	0.236828	0.0951427	2.48919	0.0128034	0.057253
YMR257C	209.28	-0.307721	0.123612	-2.4894	0.0127957	0.057253
YJL098W	483.968	-0.250009	0.100519	-2.48718	0.0128761	0.0575379
YHR113W	1275.93	0.211965	0.0852625	2.48603	0.0129177	0.0576833
YKL084W	317.474	0.272413	0.109597	2.4856	0.0129333	0.0577128
YNR055C	796.261	-0.229227	0.092234	-2.48528	0.0129449	0.0577243
YDL185W	4912.79	0.193663	0.0779471	2.48455	0.0129716	0.0578031
YFL067W	55.1847	-0.416539	0.167696	-2.4839	0.0129953	0.0578685
YNL153C	802.174	0.253717	0.102165	2.48341	0.0130133	0.0579082
YCR034W	715.718	-0.268191	0.108006	-2.4831	0.0130244	0.0579174
YMR203W	1726.45	0.214171	0.0862615	2.48282	0.0130349	0.0579237
YML066C	194.355	-0.299699	0.120805	-2.48085	0.0131071	0.0582043
YCL063W	467.692	-0.247406	0.0997919	-2.47922	0.0131669	0.0583562
YIL142C-A	127.518	0.335539	0.135346	2.47912	0.0131709	0.0583562
YFR005C	311.894	-0.267801	0.108031	-2.47893	0.0131778	0.0583562
YNL214W	397.366	0.256909	0.103627	2.47916	0.0131693	0.0583562
YNL308C	2099.19	0.247011	0.0996823	2.47799	0.0132126	0.0584697
YNL179C	151.137	-0.33133	0.133731	-2.47758	0.0132277	0.0584962
YML050W	131.918	-0.342109	0.138102	-2.47722	0.0132409	0.0585144
YCL030C	3170.67	-0.221103	0.0893306	-2.47511	0.0133195	0.0588208
YPL234C	2291.47	0.239796	0.0970303	2.47135	0.0134603	0.0594015
YKR015C	112.136	-0.356199	0.14428	-2.46881	0.0135563	0.059702
YOR040W	534.56	0.24113	0.0976563	2.46917	0.0135425	0.059702
YPR145C-A	925.307	0.265542	0.107555	2.4689	0.0135529	0.059702
YMR214W	438.02	0.243104	0.0984846	2.46844	0.0135702	0.0597217
YDR320C	604.434	0.237942	0.0964418	2.46721	0.013617	0.0598043
YJL083W	469.825	0.250686	0.101599	2.46741	0.0136094	0.0598043
YMR226C	5499.64	0.200722	0.0813492	2.46741	0.0136094	0.0598043
YIL150C	283.195	0.285547	0.115779	2.46632	0.013651	0.0598719
YGR048W	606.191	-0.249441	0.10113	-2.46654	0.0136425	0.0598719
YOR159C	354.372	-0.266884	0.108226	-2.46599	0.0136637	0.0598863
YIL151C	296.496	-0.279117	0.113296	-2.46362	0.0137543	0.0602421
YPR169W	1384.45	-0.20626	0.0837613	-2.46248	0.013798	0.0603924
YLR271W	876.349	0.215386	0.0875261	2.46082	0.013862	0.060631
YFL049W	590.144	-0.244829	0.099503	-2.46052	0.0138737	0.0606404
YLR237W	274.042	-0.269796	0.109727	-2.4588	0.0139403	0.0608697
YLR258W	2679.74	-0.219351	0.0892367	-2.45808	0.0139681	0.0608697
YMR225C	390.438	-0.271207	0.110339	-2.45794	0.0139737	0.0608697
YOR349W	308.49	0.275411	0.112042	2.45809	0.0139677	0.0608697
YOR375C	7013.92	0.209374	0.0851702	2.4583	0.0139596	0.0608697
YKR094C	19921.1	-0.239159	0.0973151	-2.45758	0.0139878	0.0608899
YNL076W	987.716	0.236855	0.0964135	2.45666	0.0140235	0.0610038
YDR464W	624.616	0.257907	0.104995	2.45637	0.014035	0.0610122
YDR362C	486.729	0.249156	0.101464	2.45561	0.0140647	0.0610998
YDR021W	378.497	0.258511	0.105334	2.4542	0.0141198	0.0612975
YBR062C	984.562	0.245056	0.099891	2.45324	0.0141577	0.0614204
YLR192C	2513.94	0.188461	0.0768427	2.45255	0.0141847	0.0614959
YAL037C-B	52590.5	0.190985	0.0779537	2.44997	0.0142867	0.0617638
YGR254W	31911.7	0.209678	0.0855713	2.45033	0.0142727	0.0617638
YLR245C	169.033	0.308057	0.125728	2.4502	0.0142778	0.0617638
YMR033W	782.059	0.214011	0.0873598	2.44977	0.0142948	0.0617638
YPL268W	560.909	0.236767	0.0966326	2.45017	0.0142787	0.0617638
YGR047C	388.314	0.25459	0.103959	2.44894	0.0143276	0.0618639
YDL060W	622.439	0.252776	0.103271	2.4477	0.0143771	0.062036
YHR016C	1339.48	0.225348	0.0921097	2.44652	0.0144242	0.0621971
YHR144C	329.808	-0.317091	0.129629	-2.44614	0.0144395	0.0622211
YBR233W-A	334.041	-0.289497	0.118535	-2.44229	0.0145944	0.0628461
YDR329C	1363.03	0.202205	0.0828307	2.44119	0.014639	0.0629658
YNL250W	438.411	0.256153	0.104933	2.44112	0.0146418	0.0629658
YPL101W	776.246	0.217442	0.089093	2.44062	0.0146622	0.063011
YBL078C	1705.57	0.205487	0.0842379	2.43937	0.014713	0.0631871
YKL079W	752.785	-0.230146	0.0944966	-2.4355	0.0148713	0.0638239
YAL035W	1641.36	0.253786	0.104262	2.43413	0.0149278	0.0639907
YIL066C	94.9356	-0.355326	0.14598	-2.43407	0.0149302	0.0639907
YML085C	3299.63	0.217089	0.0892159	2.4333	0.0149621	0.0640417
YPL115C	621.751	0.249271	0.102433	2.4335	0.0149536	0.0640417
YBR082C	5804.84	0.204981	0.0842617	2.43268	0.0149876	0.0641082
YDL243C	238.289	-0.29173	0.119936	-2.43238	0.015	0.0641182
YDR320C-A	619.877	-0.288547	0.118684	-2.43122	0.015048	0.0642073
YGL085W	296.282	-0.286741	0.117944	-2.43115	0.0150509	0.0642073
YGR245C	1161.14	0.226766	0.0932704	2.43128	0.0150457	0.0642073
YMR127C	386.468	0.248842	0.102435	2.42926	0.0151295	0.0644968
YNR045W	819.008	0.233939	0.0963094	2.42904	0.015139	0.0644968
YNL206C	774.995	0.233578	0.0961773	2.42862	0.0151563	0.0645276
YDR242W	575.025	0.239577	0.0986879	2.42762	0.0151981	0.0645997
YLR394W	176.626	-0.321265	0.132357	-2.42725	0.0152136	0.0645997
YMR027W	2384.73	0.194502	0.0801207	2.42762	0.0151983	0.0645997
YPR081C	677.552	0.236778	0.0975419	2.42745	0.0152052	0.0645997
YDR061W	721.968	0.220065	0.09069	2.42656	0.0152427	0.0646485
YDR361C	1449.62	0.208768	0.0860368	2.4265	0.0152453	0.0646485
YKL005C	524.76	0.258151	0.106414	2.42591	0.0152699	0.0647099
YDR309C	644.864	0.236158	0.0973976	2.42468	0.0153218	0.064887
YPL180W	650.73	0.228002	0.0940487	2.4243	0.0153379	0.0649121
YBR121C-A	405.746	0.288748	0.119171	2.42297	0.0153943	0.0650648
YDR412W	1391.94	-0.226761	0.0935871	-2.42299	0.0153933	0.0650648
YNL215W	1244.81	0.218246	0.0900834	2.42271	0.0154053	0.0650682
YPR027C	664.505	-0.248244	0.102554	-2.42061	0.0154944	0.0654017
YOR073W-A	72.203	0.382037	0.157988	2.41814	0.0155999	0.0658036
YCL034W	1657.11	0.2043	0.0846573	2.41326	0.0158105	0.0666433
YJR144W	673.558	-0.237065	0.0982431	-2.41305	0.0158198	0.0666433
YDL021W	601.804	0.23636	0.0979964	2.41192	0.0158687	0.0667175
YGR067C	1031.27	-0.287299	0.119106	-2.41212	0.0158599	0.0667175
YLR446W	384.232	0.254565	0.105528	2.41231	0.0158517	0.0667175
YGL123W	50394.8	-0.200872	0.0833061	-2.41126	0.0158977	0.0667516
YOL100W	860.179	-0.229092	0.0950066	-2.41133	0.0158944	0.0667516
YHR070C-A	130.702	0.335683	0.139244	2.41076	0.0159195	0.0667991
YBL090W	939.43	0.222634	0.0923742	2.41013	0.0159467	0.0668256
YGR151C	309.921	0.266738	0.110668	2.41025	0.0159417	0.0668256
YML035C	543.5	-0.231372	0.0960753	-2.40824	0.0160296	0.0670853
YPR146C	133.643	0.33403	0.13869	2.40846	0.0160201	0.0670853
YDR328C	3313.14	0.182375	0.0757454	2.40774	0.0160515	0.0671332
YDR399W	703.815	-0.230715	0.095891	-2.40601	0.0161276	0.0673254
YGL016W	311.091	0.262213	0.108984	2.40598	0.016129	0.0673254
YLR390W	373.846	-0.284014	0.118034	-2.40621	0.016119	0.0673254
YPL126W	1160.16	0.218217	0.090752	2.40454	0.0161929	0.067522
YPR074C	3176.17	-0.208221	0.0865984	-2.40444	0.0161973	0.067522
YOR030W	325.324	-0.251823	0.104772	-2.40354	0.0162374	0.0676451
YLR452C	290.132	-0.263641	0.109714	-2.40299	0.0162618	0.0677028
YNL257C	619.813	0.229002	0.0953093	2.40272	0.0162736	0.0677077
YBL046W	865.13	0.221036	0.0920442	2.40142	0.0163318	0.0679059
YPR135W	505.114	0.238758	0.0995224	2.39904	0.016438	0.068303
YPR180W	775.141	0.218072	0.0909403	2.39797	0.0164864	0.0684598
YMR315W-A	60.1767	0.394328	0.164491	2.39726	0.0165181	0.0685468
YPR189W	531.006	0.250194	0.104414	2.39618	0.016567	0.0687053
YDR097C	504.161	0.231045	0.0964436	2.39565	0.0165909	0.0687558
YDR295C	678.159	0.24794	0.103505	2.39543	0.0166007	0.0687558
YGL174W	515.818	0.234824	0.0981266	2.39307	0.016708	0.0691555
YHR041C	297.171	-0.282663	0.118194	-2.39151	0.0167791	0.0693601
YOL007C	224.326	0.280815	0.117418	2.39158	0.0167762	0.0693601
YDR115W	756.921	0.248433	0.103908	2.3909	0.0168069	0.0694302
YLR418C	793.465	0.226493	0.0947462	2.39052	0.0168246	0.0694583
YDR522C	59.9105	-0.39972	0.167239	-2.39011	0.0168432	0.0694905
YPR170W-A	2007.03	0.246817	0.103369	2.38772	0.0169533	0.0698995
YOR009W	113.792	-0.339994	0.142437	-2.38697	0.0169878	0.0699967
YNL143C	138.193	0.335708	0.140735	2.38539	0.0170608	0.0702523
YAL016C-A	376.684	0.245076	0.102806	2.38387	0.0171315	0.0704848
YER101C	403.814	0.241877	0.101473	2.38365	0.0171419	0.0704848
YMR009W	1610.79	0.205005	0.0860111	2.38347	0.0171503	0.0704848
YNR023W	506.457	0.237089	0.0995067	2.38264	0.017189	0.0705983
YMR099C	2640.91	0.188129	0.0790157	2.3809	0.0172702	0.0708865
YBL010C	228.497	0.277685	0.116697	2.37953	0.0173346	0.070972
YHR197W	649.211	0.222446	0.0934691	2.37989	0.017318	0.070972
YNL226W	111.727	0.334232	0.140441	2.37987	0.0173187	0.070972
YOR179C	706.504	0.23214	0.0975576	2.37952	0.0173354	0.070972
YGR257C	630.547	-0.243722	0.102442	-2.37914	0.0173533	0.0709998
YOR053W	235.966	-0.287752	0.120967	-2.37876	0.0173711	0.0710274
YMR011W	35892.2	0.219448	0.0922808	2.37804	0.0174049	0.0711199
YNL305C	1657.85	0.19256	0.0809992	2.37731	0.0174394	0.0712154
YOR113W	1100.24	0.271143	0.114142	2.37549	0.0175255	0.0715217
YMR102C	409.262	-0.259514	0.109269	-2.37499	0.0175492	0.0715727
YIL126W	939.945	0.228329	0.0962356	2.3726	0.0176631	0.0719914
YDL156W	160.962	0.301134	0.126964	2.3718	0.0177018	0.0721028
YIR042C	395.685	-0.25452	0.10737	-2.37048	0.017765	0.0723145
YHR139C-A	57.7688	0.389918	0.164646	2.36822	0.0178741	0.0727121
YGL006W	2476.37	-0.22057	0.0931561	-2.36775	0.0178968	0.0727583
YGR005C	1326.55	0.202121	0.0853907	2.36702	0.0179322	0.0728559
YIL033C	3595.56	0.235652	0.0995816	2.36642	0.0179608	0.0729259
YLR357W	504.11	0.258661	0.10933	2.36588	0.0179875	0.0729879
YLR130C	973.804	-0.208394	0.0881181	-2.36495	0.0180327	0.0731239
YML116W-A	350.054	-0.250131	0.105776	-2.36472	0.0180439	0.0731239
YJR107W	269.072	-0.26421	0.111766	-2.36397	0.0180804	0.0732254
YHL013C	698.598	0.224506	0.0949911	2.36344	0.0181059	0.0732826
YDL148C	1006.83	0.25667	0.108664	2.36204	0.0181746	0.0734327
YDR515W	173.956	-0.293396	0.124216	-2.36198	0.0181774	0.0734327
YPL260W	2285.48	0.20635	0.0873503	2.36233	0.0181607	0.0734327
YBR041W	629.659	-0.217714	0.0922986	-2.3588	0.0183341	0.073915
YBR056C-B	475.555	-0.274641	0.116418	-2.3591	0.0183192	0.073915
YLR230W	1661.37	-0.224563	0.0952093	-2.35862	0.018343	0.073915
YNL125C	543.38	-0.257967	0.109365	-2.35877	0.0183355	0.073915
YOL078W	328.702	0.250254	0.106119	2.35823	0.0183621	0.0739454
YER030W	1723.03	0.201303	0.085408	2.35696	0.0184254	0.0741534
YOR289W	1194.34	-0.210771	0.0894379	-2.35662	0.0184419	0.0741733
YIL113W	144.554	-0.319961	0.135803	-2.35607	0.0184693	0.074237
YDR083W	960.441	0.235237	0.0998542	2.35581	0.0184826	0.0742436
YGL074C	110.296	0.330414	0.140414	2.35315	0.0186153	0.0746831
YNL091W	2202.65	0.217529	0.092436	2.35329	0.0186082	0.0746831
YHR117W	902.16	0.213011	0.0905539	2.35231	0.0186574	0.0748048
YOR181W	711.255	-0.22374	0.0951716	-2.35091	0.0187275	0.075039
YOR158W	820.984	-0.208702	0.0887877	-2.35057	0.0187446	0.0750607
YER045C	349.872	-0.262386	0.111736	-2.34826	0.0188611	0.0754799
YNL240C	480.545	-0.243668	0.103822	-2.34697	0.0189269	0.0756959
YCR081W	339.208	0.255918	0.109055	2.34669	0.018941	0.075705
YHR132C	1830.81	0.203811	0.0868619	2.34638	0.0189566	0.0757197
YBR056W-A	546.719	-0.270753	0.115488	-2.34442	0.0190565	0.0760239
YDR262W	1055.64	-0.194891	0.0831263	-2.34451	0.0190519	0.0760239
YFL031W	3831.02	-0.192466	0.0821277	-2.34349	0.0191041	0.0761663
YBR146W	1137.09	-0.200177	0.0854419	-2.34285	0.0191373	0.0762511
YPR192W	136.884	-0.32408	0.138383	-2.3419	0.0191857	0.0763966
YML111W	384.248	-0.239216	0.102203	-2.3406	0.0192529	0.0766165
YKL220C	36.1227	-0.421111	0.180212	-2.33675	0.0194522	0.0773614
YKR100C	765.179	-0.212078	0.0908262	-2.33499	0.0195441	0.0776786
YCL028W	1855.57	0.204043	0.0874373	2.33359	0.0196173	0.0779166
YOR110W	417.118	-0.235997	0.101139	-2.33338	0.0196283	0.0779166
YGL110C	722.396	0.218254	0.093581	2.33224	0.0196878	0.0781044
YPR154W	1624.48	0.195862	0.0840085	2.33146	0.0197293	0.0782206
YPL071C	663.351	-0.219669	0.0942402	-2.33094	0.0197563	0.0782788
YML098W	690.234	0.224742	0.0964476	2.33019	0.0197959	0.0783873
YOR042W	2465.43	0.207107	0.0888913	2.32989	0.0198122	0.0784034
YDR046C	1521.22	-0.221032	0.0948948	-2.32924	0.0198465	0.0784469
YPR118W	1059.42	-0.223817	0.0960912	-2.32921	0.0198477	0.0784469
YIL064W	1238.23	-0.245709	0.105521	-2.32853	0.0198839	0.0785415
YDR374W-A	492.363	0.245053	0.105294	2.32733	0.0199475	0.0786471
YKL178C	131.778	-0.316406	0.135949	-2.32738	0.0199451	0.0786471
YPR087W	393.431	0.241351	0.103695	2.32751	0.0199379	0.0786471
YGL242C	371.078	-0.273708	0.117649	-2.32647	0.0199936	0.0787803
YOR383C	229.9	-0.308049	0.132427	-2.32618	0.020009	0.0787925
YJR009C	40509.5	0.173404	0.0745689	2.32542	0.0200497	0.0789041
YJR131W	499.362	-0.234877	0.101072	-2.32387	0.0201326	0.0791817
YOR330C	615.051	0.236241	0.101679	2.3234	0.0201577	0.0792317
YPL252C	322.316	-0.248141	0.106834	-2.32267	0.020197	0.0793375
YPR091C	696.967	-0.245046	0.105538	-2.32187	0.0202397	0.0794564
YLR146W-A	138.047	-0.312543	0.134626	-2.32157	0.0202564	0.079473
YHR006W	1963.4	-0.198758	0.0856459	-2.3207	0.0203032	0.0795591
YPR149W	8357.44	-0.20746	0.0893901	-2.32084	0.0202953	0.0795591
YML071C	832.82	0.218088	0.0939991	2.32011	0.020335	0.0796352
YAR068W	81.8898	0.351682	0.151675	2.31866	0.0204133	0.0798927
YPR088C	2140.27	0.178403	0.0769773	2.31761	0.0204705	0.0800675
YJL114W	76.4967	0.365391	0.157961	2.31318	0.0207127	0.0809656
YLR315W	83.8834	0.353031	0.152643	2.31279	0.020734	0.0809994
YBR103W	841.494	0.20137	0.0871313	2.31111	0.0208265	0.0812341
YKL033W-A	2783.94	-0.225293	0.0974865	-2.31101	0.0208322	0.0812341
YNL166C	664.358	0.227881	0.0985951	2.31128	0.0208172	0.0812341
YGL239C	150.489	0.324664	0.140549	2.30997	0.0208898	0.0814091
YKL197C	663.635	0.217198	0.0940796	2.30866	0.0209624	0.081611
YLR438C-A	1214.14	-0.214569	0.0929444	-2.30858	0.0209671	0.081611
YGR179C	482.665	0.230974	0.100151	2.30625	0.0210966	0.0820061
YJL184W	703.601	-0.278027	0.120559	-2.30615	0.0211024	0.0820061
YLR289W	247.587	0.272404	0.118125	2.30606	0.0211071	0.0820061
YDL161W	1865.56	0.221282	0.0960336	2.30422	0.0212105	0.0823418
YHR072W-A	4634.46	-0.274186	0.119001	-2.30406	0.0212192	0.0823418
YDR473C	937.671	0.210941	0.0915824	2.30329	0.0212623	0.0824592
YBR280C	815.892	0.211543	0.0918625	2.30282	0.0212889	0.0825001
YIL047C-A	126.933	-0.313384	0.136097	-2.30265	0.0212987	0.0825001
YBR003W	576.427	-0.226493	0.0984277	-2.30111	0.0213854	0.0827861
YOR017W	434.51	0.227803	0.0990161	2.30067	0.0214103	0.0828324
YLR145W	311.14	0.254687	0.110725	2.30018	0.0214382	0.0828899
YGR176W	39.2746	-0.410973	0.178709	-2.29967	0.0214668	0.0829506
YKL204W	1034.44	0.215208	0.0935979	2.29928	0.0214889	0.0829857
YKL081W	5854.47	-0.1808	0.0786526	-2.29871	0.0215211	0.0830602
YDR103W	570.76	0.233872	0.101786	2.29769	0.0215794	0.083235
YJL180C	266.323	-0.258793	0.112656	-2.29721	0.0216071	0.0832412
YPL063W	1665.02	0.209406	0.0911546	2.29727	0.0216036	0.0832412
YJL175W	135.566	0.308675	0.134407	2.29657	0.0216433	0.0833304
YBR199W	2465.96	-0.192452	0.0838138	-2.29619	0.0216652	0.0833646
YDR388W	3041.05	0.19433	0.0846695	2.29516	0.0217238	0.0835224
YOR082C	46.6351	0.39618	0.172626	2.29502	0.0217323	0.0835224
YLR275W	302.032	-0.259217	0.113042	-2.29309	0.0218426	0.0838962
YJL148W	762.156	-0.239443	0.104431	-2.29285	0.0218568	0.0839001
YDR217C	450.033	0.236207	0.103073	2.29164	0.0219262	0.084116
YGR194C	1183.12	0.211388	0.0923566	2.28882	0.0220898	0.0846929
YDL153C	2395.18	0.21384	0.09345	2.28828	0.0221212	0.0847626
YER185W	69.0535	-0.368365	0.161027	-2.2876	0.0221609	0.0848638
YHL002W	1502.83	0.192437	0.0841519	2.28678	0.0222087	0.0849614
YHR214W-A	91.9613	0.33811	0.147874	2.28648	0.0222262	0.0849614
YLR120W-A	40.823	-0.404004	0.176685	-2.28658	0.0222202	0.0849614
YER008C	957.623	0.212225	0.0928416	2.28588	0.0222613	0.0850449
YBL027W	36951.4	-0.218542	0.095645	-2.28492	0.0223173	0.0852077
YER046W-A	67.4584	-0.363808	0.159321	-2.2835	0.0224012	0.0854772
YDR505C	1115.31	-0.201979	0.0884623	-2.28322	0.0224172	0.0854873
YBR081C	765.181	0.212413	0.0930968	2.28163	0.022511	0.0856467
YLR305C	676.075	0.218539	0.095783	2.28161	0.0225126	0.0856467
YNL011C	345.848	-0.254534	0.111544	-2.28191	0.0224946	0.0856467
YOR063W	82431.7	0.16099	0.0705598	2.28161	0.0225121	0.0856467
YDR119W-A	1589.77	0.220953	0.0968662	2.28102	0.0225476	0.0857289
YLR077W	512.384	0.222857	0.0977695	2.27941	0.0226427	0.0860397
YGR171C	362.73	0.234328	0.10292	2.27679	0.0227987	0.0865809
YEL034C-A	24062.2	-0.177362	0.0779119	-2.27644	0.0228194	0.0866082
YDL031W	577.986	0.235824	0.103618	2.27589	0.0228524	0.0866559
YLR220W	1244.17	-0.192861	0.084745	-2.27578	0.0228591	0.0866559
YLR174W	1522.44	-0.290268	0.127601	-2.27482	0.0229168	0.0868232
YNR068C	373.479	0.240832	0.105978	2.27247	0.0230584	0.0873081
YHR146W	4106.18	0.209162	0.0920568	2.27209	0.0230808	0.0873413
YDR222W	1747.98	-0.212146	0.0934618	-2.26987	0.0232155	0.0877992
YMR013C	215.371	-0.265005	0.116776	-2.26935	0.023247	0.0878145
YNL118C	1834.91	0.195592	0.0861885	2.26936	0.0232467	0.0878145
YDR512C	840.119	-0.223902	0.0986922	-2.26869	0.0232872	0.087877
YLR080W	621.365	0.217944	0.0960688	2.26863	0.0232911	0.087877
YER122C	2037.51	-0.177951	0.0784633	-2.26796	0.0233318	0.0879791
YPL061W	12830.1	0.226803	0.100034	2.26725	0.0233748	0.088089
YNL065W	197.966	0.309233	0.136477	2.26582	0.0234625	0.0883675
YLR104W	442.967	-0.268649	0.118622	-2.26474	0.0235287	0.0885646
YGR092W	526.811	-0.246952	0.109138	-2.26275	0.0236513	0.088974
YNL283C	510.539	-0.223745	0.0989088	-2.26214	0.023689	0.0890633
YKL106W	253.829	-0.253651	0.112194	-2.26082	0.0237705	0.0892425
YLR312W-A	515.169	-0.237859	0.105215	-2.26069	0.0237785	0.0892425
YPR163C	4109.74	0.209583	0.0927066	2.26071	0.023777	0.0892425
YCR086W	217.152	0.268647	0.118871	2.25998	0.0238223	0.0893545
YGL038C	821.873	-0.203265	0.0899725	-2.25919	0.0238713	0.0894813
YHR051W	4377.13	-0.217028	0.0960728	-2.25899	0.0238841	0.0894813
YMR083W	4974.29	0.167576	0.0741911	2.25871	0.0239017	0.0894949
YFL022C	1688.34	0.200841	0.0889621	2.2576	0.0239709	0.0897016
YNL167C	923.246	-0.209603	0.0928532	-2.25736	0.0239853	0.089703
YAR018C	324.414	-0.259726	0.115137	-2.25579	0.0240836	0.0899838
YIL014W	678.067	-0.205793	0.09125	-2.25527	0.0241166	0.0899838
YJL195C	32.2047	0.410597	0.182052	2.25539	0.0241089	0.0899838
YOL036W	763.722	-0.268841	0.119201	-2.25535	0.0241115	0.0899838
YCL008C	421.598	0.228576	0.101387	2.25448	0.0241661	0.0901158
YDR229W	1004.48	0.22016	0.0977314	2.2527	0.0242779	0.0904801
YDR524C-B	13512.2	0.206762	0.0918184	2.25186	0.024331	0.0906251
YGL005C	1355.44	0.201908	0.0896749	2.25155	0.0243505	0.0906452
YJL161W	408.053	-0.268	0.119043	-2.25129	0.024367	0.0906536
YML101C-A	199.058	0.277917	0.123514	2.25009	0.0244431	0.0908839
YHR085W	285.519	0.271682	0.120799	2.24904	0.0245102	0.0909749
YJR082C	614.266	-0.221343	0.0984152	-2.24908	0.0245077	0.0909749
YLR250W	3492.09	-0.182382	0.0810804	-2.2494	0.0244873	0.0909749
YGL071W	445.939	-0.262077	0.116562	-2.2484	0.0245507	0.0910725
YMR195W	2609.97	-0.18858	0.0839131	-2.24732	0.0246197	0.0912753
YLR410W	1168.52	0.195789	0.0871361	2.24693	0.0246445	0.0913146
YDL083C	14750.5	-0.217617	0.09687	-2.24649	0.0246729	0.0913668
YEL022W	530.928	0.216232	0.0962993	2.24542	0.0247414	0.0915676
YPL269W	408.049	0.233729	0.104129	2.2446	0.0247935	0.0917073
YMR189W	197.701	0.272862	0.121638	2.24322	0.0248824	0.091983
YHR198C	758.998	0.202467	0.0903376	2.24122	0.0250118	0.0924078
YDL145C	1844.75	-0.187963	0.0838825	-2.24079	0.0250396	0.0924572
YMR124W	1027.52	-0.218576	0.0975742	-2.2401	0.0250841	0.0925682
YER123W	558.764	-0.230695	0.103048	-2.23872	0.025174	0.0928109
YGL050W	589.436	-0.225492	0.100727	-2.23865	0.0251789	0.0928109
YIL158W	382.42	-0.244749	0.109368	-2.23785	0.025231	0.0929062
YML125C	647.375	0.221921	0.0991691	2.2378	0.0252338	0.0929062
YNL184C	47.4787	-0.383722	0.171513	-2.23728	0.0252683	0.0929797
YPR029C	1561.83	0.185051	0.0827351	2.23667	0.0253081	0.0930726
YOR381W	101.807	-0.329571	0.147385	-2.23612	0.0253438	0.0931506
YML021C	305.876	-0.249593	0.111634	-2.23582	0.0253635	0.0931692
YAL033W	846.487	-0.244658	0.109618	-2.23191	0.0256211	0.0940616
YGR107W	18.1774	-0.414994	0.186034	-2.23075	0.0256979	0.094237
YMR154C	436.046	0.225581	0.101124	2.23074	0.0256983	0.094237
YKL113C	583.587	0.21916	0.0982589	2.23043	0.0257187	0.0942577
YCL048W-A	76.8129	-0.348727	0.156372	-2.23012	0.0257395	0.09428
YJL077W-A	298.331	-0.314783	0.141182	-2.22963	0.0257721	0.0942913
YNL121C	1870.62	0.199599	0.0895191	2.22969	0.0257683	0.0942913
YHR069C-A	100.372	0.326734	0.146604	2.22868	0.025835	0.0944674
YMR061W	1557.85	0.187242	0.0840494	2.22775	0.0258969	0.0946398
YDR045C	611.739	-0.250663	0.112552	-2.2271	0.0259409	0.0947465
YGR037C	1658.44	0.188619	0.0847047	2.22678	0.0259617	0.0947683
YPR170W-B	2543	0.237703	0.106807	2.22553	0.026046	0.0950219
YGL173C	1948.65	0.190575	0.0856566	2.22487	0.0260898	0.0951275
YDL233W	524.789	0.211611	0.0951258	2.22454	0.0261124	0.0951554
YMR299C	722.535	0.235467	0.105894	2.22362	0.0261741	0.0953263
YKL019W	1149.22	0.183079	0.082364	2.2228	0.026229	0.0954718
YBR083W	870.867	-0.21833	0.0983068	-2.22091	0.0263571	0.0958431
YLR274W	675.683	-0.216796	0.0976185	-2.22085	0.026361	0.0958431
YIL007C	762.962	0.203223	0.0915304	2.22028	0.0263997	0.0959295
YBR018C	33317.9	-0.177534	0.0799823	-2.21967	0.0264412	0.0960037
YBR084W	2004.86	0.19965	0.0899513	2.21954	0.0264501	0.0960037
YAL038W	78389.2	0.171427	0.0772604	2.21882	0.026499	0.0961264
YGR122C-A	45.8837	-0.384446	0.173463	-2.2163	0.0266712	0.0966962
YLR353W	163.352	-0.284216	0.128333	-2.21468	0.0267821	0.0970434
YCR009C	4672.86	0.16702	0.0754361	2.21406	0.0268247	0.0970878
YCR030C	1095.6	0.18904	0.0853736	2.21427	0.0268103	0.0970878
YDR178W	2126.33	-0.187755	0.0848393	-2.21307	0.026893	0.0972801
YBR173C	1781.31	0.194154	0.0877546	2.21247	0.0269345	0.0973118
YDL039C	1183.38	0.221643	0.100206	2.21188	0.0269748	0.0973118
YGR025W	35.5492	-0.396689	0.179277	-2.21272	0.0269171	0.0973118
YPL224C	775.326	-0.206285	0.0932497	-2.21217	0.0269546	0.0973118
YPR050C	236.533	-0.259961	0.117531	-2.21184	0.0269778	0.0973118
YPR051W	288.653	-0.247748	0.112051	-2.21102	0.0270344	0.0974611
YBR161W	213.427	-0.264316	0.119664	-2.20883	0.0271867	0.0978573
YER048W-A	1825.4	-0.248834	0.112645	-2.20901	0.0271736	0.0978573
YPL051W	303.071	-0.266887	0.12083	-2.20878	0.0271902	0.0978573
YBL054W	599.746	0.216221	0.097925	2.20803	0.0272422	0.097934
YER172C	866.501	0.201782	0.0913831	2.20809	0.0272379	0.097934
YNL173C	3105.52	0.214442	0.097182	2.20661	0.0273416	0.0982363
YCR079W	537.178	-0.217285	0.0985502	-2.20481	0.0274672	0.0984739
YLR129W	488.433	0.21769	0.0987308	2.20489	0.0274619	0.0984739
YMR001C	307.85	-0.262049	0.118855	-2.20478	0.0274693	0.0984739
YMR095C	168.537	-0.275192	0.124786	-2.20531	0.0274325	0.0984739
YKL044W	94.6475	-0.324249	0.14715	-2.20352	0.027558	0.0987365
YKR098C	716.305	-0.228821	0.103904	-2.20224	0.0276486	0.0988953
YML081C-A	1949.87	-0.211837	0.0961863	-2.20236	0.0276396	0.0988953
YOR216C	625.684	0.218715	0.0993046	2.20247	0.0276323	0.0988953
YGL093W	606.472	0.210311	0.0955529	2.20099	0.0277369	0.0991002
YJL033W	1011.25	0.195807	0.088955	2.20119	0.0277227	0.0991002
YOL034W	282.192	0.262378	0.119225	2.2007	0.0277571	0.0991169
YLR093C	2453.37	-0.173792	0.0790562	-2.19833	0.0279254	0.0996624
YOL107W	223.586	-0.267607	0.121774	-2.19757	0.0279799	0.0998011
YLR437C	324.827	0.240543	0.109496	2.19682	0.0280333	0.0999359
YER074W	15594.1	-0.214354	0.0976064	-2.1961	0.0280845	0.100063
YJR071W	508.585	0.212787	0.0970236	2.19315	0.0282966	0.100762
YDL120W	732.945	-0.219523	0.100168	-2.19155	0.0284119	0.101117
YNR043W	1263.67	0.187743	0.085727	2.19001	0.0285236	0.101458
YBL092W	37274.3	-0.23696	0.108247	-2.18906	0.0285926	0.101647
YGR217W	204.076	-0.260479	0.119005	-2.1888	0.0286111	0.101656
YFR009W-A	292.703	0.239473	0.109442	2.18813	0.0286602	0.101774
YOR284W	222.417	0.268688	0.123001	2.18443	0.0289305	0.102677
YBR135W	240.022	-0.251686	0.115259	-2.18365	0.0289876	0.102768
YJL015C	73.8044	-0.338996	0.155243	-2.18364	0.0289884	0.102768
YOR058C	374.351	-0.277407	0.127071	-2.18309	0.0290295	0.102857
YBR080C	1124.1	0.195315	0.0895662	2.18067	0.0292076	0.10301
YCL056C	562.31	-0.24487	0.112294	-2.18063	0.0292111	0.10301
YDL106C	1013.83	0.206415	0.094641	2.18103	0.029181	0.10301
YDR319C	690.498	-0.207493	0.0951391	-2.18095	0.0291875	0.10301
YDR465C	1636.45	0.182688	0.0837553	2.18121	0.0291681	0.10301
YIL154C	1450.07	0.184808	0.0846905	2.18216	0.0290979	0.10301
YER021W	3824.42	0.158712	0.0727551	2.18145	0.0291501	0.10301
YLR328W	1145.16	-0.179833	0.0824281	-2.1817	0.0291319	0.10301
YPR061C	373.443	-0.224074	0.102761	-2.18054	0.0292177	0.10301
YHR023W	475.585	-0.220768	0.101263	-2.18015	0.0292463	0.103055
YLR151C	508.032	0.22034	0.101098	2.17946	0.0292972	0.103177
YCR102C	328	-0.24691	0.113308	-2.1791	0.0293241	0.103215
YGL025C	588.686	0.212874	0.0977003	2.17885	0.0293427	0.103224
YDR057W	728.259	-0.197456	0.090676	-2.1776	0.029436	0.103495
YDL091C	906.219	0.190957	0.0877753	2.17552	0.0295909	0.103925
YOL155W-A	76.9693	-0.34774	0.159829	-2.1757	0.0295775	0.103925
YMR068W	275.715	0.241239	0.111087	2.17162	0.0298844	0.104899
YLR299W	1203.89	-0.188341	0.0867883	-2.17012	0.0299975	0.105238
YEL019C	125.922	0.297315	0.137323	2.16508	0.0303817	0.106411
YKL014C	472.628	0.218049	0.100704	2.16524	0.030369	0.106411
YPR161C	704.722	0.205773	0.0950417	2.16508	0.0303813	0.106411
YNL232W	1356.5	0.183635	0.0848363	2.16458	0.0304195	0.106485
YLR227C	389.234	-0.221252	0.102258	-2.16366	0.0304905	0.106675
YKL023W	1072.58	0.178478	0.0825178	2.16291	0.0305483	0.106761
YOL139C	7046.31	-0.232463	0.107477	-2.1629	0.0305486	0.106761
YPR193C	225.527	-0.282958	0.130837	-2.16268	0.0305659	0.106764
YGR164W	27.4053	-0.396769	0.183499	-2.16224	0.0305995	0.106823
YOR156C	245.561	0.257442	0.119127	2.16107	0.0306903	0.107081
YDR532C	707.092	-0.20386	0.0943485	-2.16071	0.0307178	0.107119
YER117W	25766.5	-0.240045	0.111125	-2.16013	0.0307623	0.107157
YLR046C	106.404	-0.309335	0.143197	-2.16021	0.0307564	0.107157
YCR072C	105.496	0.312144	0.144632	2.1582	0.0309121	0.10762
YMR015C	614.859	0.262772	0.121785	2.15767	0.0309538	0.107707
YLL041C	1903.14	-0.193406	0.0897476	-2.155	0.0311618	0.108372
YGR197C	362.651	-0.220952	0.102549	-2.15459	0.0311937	0.108424
YPL150W	752.725	0.192277	0.0892861	2.15349	0.0312799	0.108665
YEL048C	179.049	0.278375	0.129282	2.15324	0.0313	0.108675
YHR059W	282.544	-0.237214	0.110212	-2.15234	0.0313705	0.108861
YOL030W	3003.57	0.191288	0.0889022	2.15167	0.0314234	0.108986
YER168C	508.753	-0.207841	0.0966288	-2.15092	0.0314826	0.109132
YOL087C	1099.77	-0.204464	0.0951619	-2.14859	0.0316671	0.109712
YBR175W	128.986	-0.30548	0.142199	-2.14825	0.0316936	0.109744
YBL031W	162.579	0.275644	0.128343	2.14771	0.0317365	0.109774
YGR219W	477.354	-0.24687	0.114938	-2.14785	0.0317256	0.109774
YKL085W	4905.93	-0.17217	0.0801952	-2.14689	0.031802	0.109941
YNL155W	1092.48	-0.18197	0.0847913	-2.14609	0.0318655	0.110101
YAL001C	842.589	0.243797	0.113644	2.14526	0.0319317	0.110193
YAR019C	623.638	0.211241	0.0984754	2.14511	0.0319438	0.110193
YDR208W	1065.05	0.226773	0.105704	2.14536	0.0319237	0.110193
YLR149C	2313.89	0.18939	0.0883043	2.14474	0.0319733	0.110236
YDL005C	1174.54	0.184704	0.0861555	2.14384	0.0320455	0.110342
YGR035W-A	58.7536	-0.35024	0.16338	-2.14371	0.032056	0.110342
YHR114W	1000.14	0.186341	0.0869244	2.14371	0.032056	0.110342
YGR232W	541.365	-0.215258	0.100489	-2.1421	0.0321855	0.110728
YER115C	465.079	0.209211	0.0976987	2.14139	0.0322424	0.110785
YFR012W	34.3055	-0.384856	0.179721	-2.14141	0.0322411	0.110785
YGL210W	524.509	0.203876	0.0952152	2.14121	0.0322571	0.110785
YPL064C	789.063	-0.192882	0.090095	-2.14087	0.0322841	0.110785
YPR057W	704.981	0.194725	0.0909582	2.14082	0.0322886	0.110785
YBL049W	299.147	-0.228362	0.106721	-2.13981	0.0323701	0.110827
YKL174C	563.927	-0.205657	0.096094	-2.14017	0.0323411	0.110827
YLR181C	703.114	0.205706	0.0961232	2.14002	0.0323532	0.110827
YPL256C	537.251	0.212515	0.0993147	2.13982	0.0323695	0.110827
YMR088C	782.953	0.191168	0.0893749	2.13895	0.0324398	0.111006
YHR165C	751.295	0.202329	0.0946575	2.13749	0.0325585	0.111294
YNL006W	838.537	0.199575	0.093369	2.13749	0.0325582	0.111294
YDR359C	365.437	-0.234189	0.109639	-2.13601	0.0326785	0.111525
YER155C	1097.94	0.182381	0.0853798	2.13611	0.0326701	0.111525
YHR003C	1037.98	0.178077	0.0833531	2.13642	0.0326455	0.111525
YBL093C	1092.83	-0.190346	0.0891498	-2.13512	0.0327511	0.111713
YOL141W	54.8399	0.360729	0.168973	2.13484	0.0327745	0.111733
YPL117C	3570.78	-0.160288	0.075148	-2.13296	0.0329281	0.112198
YCR105W	727.557	-0.210048	0.0985886	-2.13055	0.0331263	0.112813
YEL049W	41.8532	0.3706	0.173984	2.13008	0.0331653	0.112886
YGL141W	656.267	-0.190805	0.0896753	-2.12773	0.0333593	0.113485
YOR025W	151.777	-0.282215	0.132836	-2.12453	0.0336255	0.11433
YER037W	629.084	0.218566	0.102906	2.12393	0.0336757	0.114392
YPR078C	115.089	-0.309813	0.145871	-2.12389	0.0336793	0.114392
YBR284W	179.425	-0.261263	0.123127	-2.1219	0.0338463	0.114898
YGL122C	2258.63	0.201953	0.0952563	2.1201	0.0339977	0.115351
YKL029C	1022.96	0.191176	0.0902151	2.11912	0.0340806	0.115509
YLR285W	912.654	-0.191334	0.0902859	-2.1192	0.0340735	0.115509
YIL127C	1318.9	-0.201697	0.0952109	-2.11842	0.0341394	0.115648
YOL121C	6830.38	-0.224608	0.106078	-2.11739	0.0342269	0.115882
YMR237W	1445.54	0.18133	0.0856572	2.11693	0.0342661	0.115954
YGR173W	561.158	0.211885	0.100173	2.11519	0.0344133	0.116391
YGR120C	610.889	0.217819	0.102995	2.11485	0.0344428	0.116429
YGL227W	1430.68	0.203253	0.0961247	2.11448	0.0344747	0.116475
YDR041W	1693.72	0.167025	0.079024	2.1136	0.0345497	0.116556
YMR311C	3652.88	0.172391	0.0815571	2.11374	0.0345373	0.116556
YNL265C	970.571	0.181564	0.0859048	2.11355	0.0345534	0.116556
YJR070C	2125.49	0.184556	0.0873412	2.11304	0.034597	0.116642
YDR027C	946.946	0.19077	0.0903141	2.11229	0.0346615	0.116748
YGR084C	332.797	-0.223123	0.105633	-2.11225	0.0346648	0.116748
YBL003C	7411.78	0.221966	0.105121	2.11154	0.0347262	0.116831
YJR117W	1252.77	0.189302	0.0896438	2.11171	0.0347112	0.116831
YJL160C	64.0633	-0.343743	0.162838	-2.11095	0.034777	0.116941
YLR204W	793.194	-0.203778	0.0965809	-2.10992	0.0348651	0.117175
YLR165C	389.052	-0.216939	0.102885	-2.10856	0.0349825	0.117508
YCR052W	813.611	0.19266	0.0914201	2.10742	0.0350815	0.117717
YFL025C	184.511	-0.258143	0.122488	-2.1075	0.0350745	0.117717
YFL017C	823.898	-0.210889	0.100099	-2.1068	0.035135	0.117782
YPL082C	363.371	0.2418	0.114773	2.10677	0.0351378	0.117782
YOR136W	4101.47	-0.168159	0.0798544	-2.10582	0.03522	0.117996
YOR184W	2449.11	0.160851	0.0764198	2.10484	0.0353053	0.11822
YBR201W	605.981	0.197762	0.0939882	2.10411	0.0353687	0.118247
YHL048W	1029.59	-0.176663	0.0839543	-2.10428	0.0353541	0.118247
YMR209C	517.193	-0.212526	0.101001	-2.1042	0.0353611	0.118247
YDL134C	1619.93	-0.17154	0.0815498	-2.1035	0.0354219	0.118301
YMR269W	454.976	0.224315	0.106636	2.10355	0.0354176	0.118301
YBR137W	982.078	0.179683	0.0854373	2.1031	0.0354572	0.118357
YHR102W	758.365	0.190683	0.0907107	2.1021	0.0355442	0.118586
YBR255W	636.139	-0.210225	0.10002	-2.10184	0.0355673	0.1186
YBR255C-A	333.76	-0.220427	0.104891	-2.10149	0.0355979	0.1186
YOR026W	309.998	0.228267	0.108625	2.10142	0.0356041	0.1186
YLR219W	988.685	-0.189088	0.0900142	-2.10065	0.0356719	0.118669
YNL147W	1086.49	0.197328	0.093934	2.10071	0.0356663	0.118669
YPL259C	983.446	0.180604	0.0859796	2.10055	0.0356806	0.118669
YLR163W-A	104.463	0.304982	0.145218	2.10017	0.0357136	0.118718
YLR096W	567.994	0.195695	0.093196	2.09982	0.0357447	0.118759
YOR308C	362.147	0.23319	0.111118	2.09859	0.0358535	0.119059
YDL227C	184.259	0.266967	0.127346	2.09639	0.0360477	0.119574
YDR308C	870.946	-0.219952	0.104929	-2.0962	0.0360648	0.119574
YHR015W	70.5096	-0.330255	0.157546	-2.09624	0.0360608	0.119574
YMR096W	1393.92	-0.178863	0.0853455	-2.09576	0.0361036	0.119579
YPR132W	27892.2	-0.212583	0.101429	-2.09588	0.0360926	0.119579
YJL049W	533.15	-0.209089	0.0997893	-2.0953	0.036144	0.119651
YDL075W	33797.2	-0.243664	0.116305	-2.09504	0.0361678	0.119668
YCL012C	228.437	-0.248295	0.118562	-2.09423	0.0362394	0.119781
YOR152C	194.616	-0.278679	0.13306	-2.09439	0.0362251	0.119781
YDR023W	9003.29	0.169476	0.0809694	2.09309	0.0363413	0.119808
YFR016C	1512.26	0.225742	0.107812	2.09384	0.0362743	0.119808
YML123C	795.359	0.199887	0.0954976	2.09311	0.0363393	0.119808
YNR003W-A	150.577	0.284232	0.135784	2.09326	0.0363256	0.119808
YPR196W	217.464	0.246698	0.117841	2.09348	0.0363066	0.119808
YDL041W	75.3616	0.328266	0.156944	2.09161	0.0364731	0.120181
YNL120C	141.966	0.274888	0.131554	2.08955	0.0366581	0.120728
YMR191W	1312.43	0.181415	0.0868469	2.08891	0.0367158	0.120856
YDL015C	2306.32	0.169904	0.0814564	2.08583	0.0369944	0.121711
YBR059C	1128.55	0.20095	0.0963701	2.08519	0.0370524	0.121724
YBR167C	630.725	-0.24643	0.118184	-2.08515	0.0370557	0.121724
YLR037C	50.4116	-0.360104	0.172695	-2.08521	0.0370506	0.121724
YFL013C	1229.39	0.20076	0.0963178	2.08435	0.0371287	0.121902
YMR233W	424.261	-0.213601	0.102491	-2.0841	0.0371513	0.121913
YNR013C	692.179	-0.189393	0.0909169	-2.08315	0.0372379	0.122135
YGR240C	6656.46	-0.187562	0.0900563	-2.08272	0.0372768	0.1222
YDR417C	14449.5	-0.210317	0.100997	-2.08242	0.0373046	0.122228
YOL159C-A	156.568	0.271963	0.130744	2.08012	0.0375149	0.122855
YOR169C	638.653	0.205351	0.0987516	2.07947	0.0375739	0.122922
YPR148C	3614.42	0.175022	0.0841633	2.07955	0.0375668	0.122922
YJR045C	3571.31	0.18592	0.0894616	2.07822	0.0376895	0.123111
YKL069W	985.554	0.226099	0.108791	2.07829	0.0376828	0.123111
YNL306W	1405.26	-0.219833	0.105769	-2.07843	0.0376702	0.123111
YHR187W	490.288	-0.209582	0.100876	-2.07761	0.0377453	0.123204
YKR041W	63.2467	0.333056	0.160316	2.07749	0.0377563	0.123204
YFL002C	680.911	-0.186655	0.0899296	-2.07556	0.0379342	0.123721
YDR226W	4403.97	-0.186888	0.0900768	-2.07477	0.038008	0.123899
YGR091W	520.911	0.199106	0.0960342	2.07328	0.038146	0.124285
YEL012W	1344.55	-0.204304	0.0986529	-2.07094	0.0383646	0.124741
YFR025C	1192.31	0.175591	0.0847798	2.07114	0.0383459	0.124741
YHR046C	427.761	-0.226116	0.109185	-2.07094	0.0383643	0.124741
YLR040C	273.283	-0.227427	0.109829	-2.07074	0.0383833	0.124741
YOL006C	537.602	0.218117	0.105309	2.07121	0.038339	0.124741
YCR057C	643.028	0.192545	0.0930558	2.06913	0.0385336	0.125166
YAL032C	473.104	-0.206857	0.100093	-2.06665	0.038767	0.125432
YDR010C	22.7826	-0.384079	0.185792	-2.06726	0.03871	0.125432
YDR221W	742.104	0.206358	0.0998536	2.0666	0.0387716	0.125432
YIR039C	802.023	-0.179999	0.0870994	-2.06659	0.0387725	0.125432
YLR276C	1830.67	0.189842	0.0918476	2.06693	0.0387409	0.125432
YLR297W	349.943	-0.215375	0.104193	-2.06708	0.0387269	0.125432
YNR039C	285.067	-0.235713	0.114005	-2.06756	0.038681	0.125432
YPL220W	23771.6	-0.198972	0.0962158	-2.06798	0.0386423	0.125432
YDR344C	80.2081	0.31779	0.153808	2.06615	0.0388142	0.125504
YNL314W	529.273	0.196123	0.094945	2.06565	0.0388614	0.125593
YCL057W	1124.87	0.18084	0.0875919	2.06457	0.0389638	0.125772
YER076C	237.461	0.256206	0.124081	2.06483	0.0389394	0.125772
YMR031W-A	51.0719	0.351141	0.17009	2.06444	0.0389759	0.125772
YGR249W	1195.24	0.194477	0.0942363	2.06372	0.0390442	0.125813
YOL150C	169.322	-0.29688	0.143859	-2.06369	0.0390475	0.125813
YPR101W	734.561	-0.218503	0.105871	-2.06386	0.0390306	0.125813
YGR085C	19981.3	-0.203837	0.0988463	-2.06217	0.0391919	0.126172
YGR178C	2028.13	0.179581	0.0870863	2.0621	0.0391982	0.126172
YPL246C	993.479	-0.180116	0.0875293	-2.05778	0.0396111	0.127436
YPR133C	2163.46	0.157883	0.0767471	2.05719	0.039668	0.127556
YOR267C	1413.87	-0.211708	0.102935	-2.05672	0.0397131	0.127637
YOR359W	77.6383	-0.332376	0.161661	-2.05601	0.0397816	0.127792
YBR203W	1190.21	-0.176471	0.0858765	-2.05494	0.0398845	0.127982
YGL058W	449.027	-0.200152	0.097415	-2.05463	0.0399148	0.127982
YGR292W	278.23	-0.236685	0.115196	-2.05463	0.0399147	0.127982
YOR329C	842.719	-0.17972	0.0874732	-2.05457	0.0399207	0.127982
YPL204W	1706.69	-0.168461	0.0820062	-2.05425	0.0399517	0.128017
YDR365C	1656.29	0.185119	0.0901606	2.05321	0.0400519	0.128274
YIL156W-B	974.292	0.213547	0.104033	2.05268	0.0401037	0.128361
[truncated: 4,400 more rows]

## Sheet: CPTH2_vs_DMSO
	baseMean	log2FoldChange	lfcSE	stat	pvalue	padj
YDR533C	5309.18	3.10385	0.12249	25.3397	1.16776e-141	7.77496e-138
YBR072W	6150.22	4.69897	0.192343	24.4302	8.16726e-132	2.71888e-128
YBL075C	2360.85	4.20548	0.190301	22.0991	3.22386e-108	7.15481e-105
YIL162W	11371.8	3.4702	0.161347	21.5077	1.32007e-102	2.19726e-99
YBR067C	2116.48	2.48016	0.12585	19.7073	1.86635e-86	2.48523e-83
YGR043C	1823.1	2.01475	0.103339	19.4965	1.17613e-84	1.30511e-81
YNL142W	584.669	-2.22015	0.116711	-19.0226	1.10822e-80	1.05407e-77
YOR120W	6155.24	2.03212	0.108247	18.7729	1.25741e-78	1.04648e-75
YDL204W	4995.66	1.80401	0.0965508	18.6846	6.60583e-78	4.88684e-75
YLR411W	1306.68	3.27153	0.17722	18.4603	4.3105e-76	2.86993e-73
YOR382W	583.775	2.32977	0.12721	18.3144	6.35136e-75	3.84431e-72
YPR160C-A	1951.19	1.5744	0.0865615	18.1882	6.3959e-74	3.54866e-71
YDL222C	1893.95	2.63059	0.147297	17.8591	2.45521e-71	1.25744e-68
YPR160W	13109.4	1.57464	0.0890611	17.6804	5.93526e-70	2.82264e-67
YOR121C	2029.82	1.84725	0.10483	17.6213	1.69078e-69	7.50479e-67
YIL136W	13306.1	1.65206	0.0950163	17.3871	1.0332e-67	4.29939e-65
YGR236C	1209.91	2.57503	0.151349	17.0139	6.4765e-65	2.5365e-62
YMR169C	1526.34	1.8963	0.112732	16.8213	1.70332e-63	6.30039e-61
YDR406W	2949.34	3.14903	0.187295	16.8132	1.95189e-63	6.83982e-61
YHR143W	808.636	-2.13336	0.128519	-16.5996	7.01942e-62	2.33676e-59
YML128C	12906	1.60799	0.0980759	16.3954	2.06376e-60	6.54309e-58
YGR256W	571.426	2.69044	0.168352	15.981	1.73419e-57	5.24098e-55
YOL151W	4497.15	3.08643	0.193164	15.9783	1.81049e-57	5.24098e-55
YOL150C	1150.57	3.27988	0.207081	15.8387	1.68353e-56	4.67038e-54
YPR184W	6280.35	2.04352	0.129681	15.7581	6.0455e-56	1.61004e-53
YER150W	3751.77	2.22297	0.141663	15.6919	1.71816e-55	4.39982e-53
YJR148W	3347.64	1.7052	0.110376	15.449	7.65725e-54	1.88822e-51
YPL088W	1854.98	2.06027	0.133737	15.4054	1.50644e-53	3.5821e-51
YNL274C	3331.58	1.53517	0.100168	15.3259	5.13095e-53	1.178e-50
YCR102C	989.902	2.11618	0.138512	15.278	1.07241e-52	2.38004e-50
YMR175W	362.513	2.46835	0.161953	15.2411	1.88593e-52	4.05049e-50
YFL054C	2498.14	1.54316	0.10187	15.1483	7.77295e-52	1.61726e-49
YDL223C	2460.26	2.60434	0.172319	15.1134	1.32054e-51	2.66429e-49
YHR096C	3003.74	2.05086	0.136658	15.0073	6.57876e-51	1.28828e-48
YNL195C	3670.3	2.77611	0.185693	14.95	1.55748e-50	2.96277e-48
YKL163W	2875.72	2.28462	0.154091	14.8264	9.88859e-50	1.82884e-47
YOR173W	3409.77	1.48566	0.100594	14.7689	2.3246e-49	4.18303e-47
YHR087W	7724.49	1.98576	0.135205	14.6871	7.80239e-49	1.36706e-46
YBR296C	1394.02	2.07896	0.141813	14.6599	1.16408e-48	1.9873e-46
YDR133C	7024.49	-1.16667	0.0797064	-14.6371	1.6288e-48	2.71114e-46
YAL061W	3357.87	1.9915	0.136802	14.5576	5.22779e-48	8.48942e-46
YHR104W	3590.58	1.68057	0.118074	14.2332	5.69961e-46	9.03524e-44
YLR178C	4747.71	1.62362	0.114425	14.1893	1.06667e-45	1.65161e-43
YGR035C	485.99	2.99986	0.212632	14.1082	3.38067e-45	5.11557e-43
YFR053C	70634.9	2.11736	0.151437	13.9818	2.01335e-44	2.96517e-42
YGL225W	426.072	-1.91968	0.13731	-13.9806	2.04863e-44	2.96517e-42
YDR011W	3777.15	2.80663	0.200925	13.9685	2.42669e-44	3.43764e-42
YFL030W	2451.66	2.0369	0.147618	13.7985	2.60128e-43	3.60819e-41
YGR281W	2296.72	2.61826	0.189932	13.7852	3.1273e-43	4.2493e-41
YDR034W-B	1170.7	1.55892	0.113169	13.7751	3.59917e-43	4.79265e-41
YHL021C	15825.7	1.00609	0.0732202	13.7406	5.8033e-43	7.57616e-41
YHL032C	2075	1.59028	0.115761	13.7376	6.04706e-43	7.74256e-41
YJL185C	797.962	1.64431	0.119706	13.7362	6.16434e-43	7.7438e-41
YDR343C	18521.7	1.63058	0.118909	13.7129	8.50321e-43	1.04841e-40
YER124C	1231.11	-2.35189	0.17172	-13.6961	1.07143e-42	1.29702e-40
YNL200C	1399.44	1.46516	0.107061	13.6853	1.24245e-42	1.47718e-40
YCR091W	1484.22	1.4794	0.108775	13.6006	3.97176e-42	4.6393e-40
YEL065W	230.527	1.99659	0.147001	13.5821	5.11183e-42	5.86803e-40
YDR342C	23482.5	1.62761	0.120022	13.561	6.82332e-42	7.69994e-40
YMR103C	772.686	1.44861	0.107153	13.5191	1.20572e-41	1.33795e-39
YGL156W	1631.17	1.54778	0.114594	13.5066	1.43024e-41	1.56107e-39
YMR250W	4616.39	1.32744	0.0982949	13.5047	1.46683e-41	1.57519e-39
YOR383C	550.623	1.6647	0.123343	13.4965	1.63925e-41	1.7324e-39
YPR123C	207.267	2.40556	0.178526	13.4745	2.20833e-41	2.29735e-39
YER103W	1871.52	1.97471	0.147519	13.3862	7.2853e-41	7.46239e-39
YML131W	3062.46	2.05541	0.15382	13.3624	1.00246e-40	1.01127e-38
YLL060C	606.968	2.27845	0.170542	13.36	1.03524e-40	1.02875e-38
YFR052C-A	6840.01	2.06034	0.154612	13.3259	1.63599e-40	1.60183e-38
YPR194C	553.384	-1.99894	0.15092	-13.2451	4.81727e-40	4.64831e-38
YCL048W-A	226.591	1.9628	0.148309	13.2345	5.54508e-40	5.27417e-38
YFL014W	31774.9	2.20233	0.167042	13.1843	1.08015e-39	1.01291e-37
YKL043W	1868.84	1.32874	0.100799	13.1821	1.11313e-39	1.02934e-37
YDR171W	11558.8	1.70527	0.13101	13.0163	9.88641e-39	9.01695e-37
YKL156W	2403.95	-1.48052	0.113935	-12.9945	1.31544e-38	1.18354e-36
YEL070W	668.502	1.74312	0.134329	12.9765	1.6627e-38	1.47603e-36
YPR124W	710.627	1.51687	0.117725	12.8849	5.47151e-38	4.79333e-36
YLR286C	4309.53	-1.3329	0.103628	-12.8625	7.32127e-38	6.33052e-36
YNL134C	10493.7	2.35132	0.183501	12.8136	1.37545e-37	1.17407e-35
YDL085W	895.382	1.87648	0.146566	12.803	1.57734e-37	1.32936e-35
YKL009W	1256.52	-1.76761	0.138833	-12.732	3.9273e-37	3.26849e-35
YOR224C	1352.24	-1.33623	0.105342	-12.6847	7.19184e-37	5.91152e-35
YKL217W	13280.5	1.93439	0.152909	12.6506	1.11057e-36	9.01727e-35
YIL117C	4197.63	1.43073	0.114241	12.5237	5.53902e-36	4.39033e-34
YNL194C	7235.76	1.62508	0.129759	12.5238	5.53324e-36	4.39033e-34
YBR046C	1837.17	1.30532	0.104694	12.4679	1.11687e-35	8.74841e-34
YJL144W	2367.28	1.85519	0.14956	12.4043	2.47576e-35	1.9167e-33
YDL227C	92.1892	-2.94469	0.237735	-12.3865	3.09384e-35	2.36768e-33
YOL084W	649.303	1.33398	0.107767	12.3784	3.42233e-35	2.5893e-33
YCR010C	1505.3	1.76289	0.142899	12.3367	5.74842e-35	4.30033e-33
YPL240C	7703.45	2.43568	0.19755	12.3294	6.28929e-35	4.65268e-33
YBR241C	1001.29	1.28681	0.104553	12.3078	8.22429e-35	6.01729e-33
YBR020W	41406.8	1.75295	0.14309	12.2506	1.66659e-34	1.2061e-32
YMR170C	1043.95	1.14526	0.0936769	12.2256	2.26778e-34	1.62354e-32
YBL049W	574.313	1.31517	0.108313	12.1423	6.30005e-34	4.46231e-32
YMR107W	4969.38	1.68849	0.139076	12.1407	6.42385e-34	4.5021e-32
YBR169C	4247.86	1.97385	0.162623	12.1376	6.67918e-34	4.63229e-32
YAL004W	3276.89	2.0098	0.166853	12.0453	2.05268e-33	1.40894e-31
YLL026W	17865.3	1.69586	0.141013	12.0262	2.58764e-33	1.75801e-31
YLR346C	439.753	2.66739	0.222603	11.9827	4.3774e-33	2.94391e-31
YKL156C-A	1197.69	-1.62453	0.135631	-11.9775	4.66091e-33	3.09289e-31
YPL079W	9867.55	-1.33457	0.111428	-11.977	4.69183e-33	3.09289e-31
YLR149C	3467.81	1.13111	0.0952964	11.8693	1.70826e-32	1.11506e-30
YAL005C	12194.9	2.03689	0.171655	11.8662	1.77425e-32	1.14689e-30
YKR076W	1533.97	1.63974	0.138286	11.8576	1.96605e-32	1.25865e-30
YLR448W	4916.25	-1.13911	0.096398	-11.8167	3.19837e-32	2.02807e-30
YER054C	1293.84	1.50527	0.127505	11.8056	3.65175e-32	2.29371e-30
YMR105C	10426.3	1.20302	0.101929	11.8026	3.78412e-32	2.35464e-30
YJR096W	2816.59	1.04967	0.0891787	11.7705	5.54224e-32	3.41669e-30
YGR248W	2376.07	1.51696	0.129046	11.7552	6.64094e-32	4.05646e-30
YOL083W	1078.02	1.10343	0.0940522	11.7321	8.72799e-32	5.28282e-30
YIL125W	6450.29	1.40144	0.119954	11.6831	1.55496e-31	9.32694e-30
YHL047C	500.869	1.49589	0.12807	11.6803	1.60725e-31	9.55451e-30
YGR088W	6031.36	1.68775	0.144831	11.6532	2.21055e-31	1.30246e-29
YLR186W	521.222	-1.50587	0.130961	-11.4986	1.3413e-30	7.83368e-29
YAR035W	1488.73	2.20272	0.191894	11.4788	1.68556e-30	9.75866e-29
YMR031C	4933.8	1.12784	0.0984607	11.4547	2.22672e-30	1.27806e-28
YNR073C	499.928	1.6162	0.141621	11.4121	3.63678e-30	2.06955e-28
YER142C	835.432	1.30949	0.114812	11.4056	3.92261e-30	2.21328e-28
YGL028C	282.679	-2.07903	0.182665	-11.3816	5.16167e-30	2.88793e-28
YCL042W	3601.79	1.48384	0.130574	11.3639	6.32374e-30	3.50862e-28
YGR194C	1728.99	1.09814	0.096679	11.3586	6.71941e-30	3.69734e-28
YMR058W	1951.19	1.68037	0.148405	11.3228	1.01149e-29	5.52011e-28
YER175C	2223.21	1.3653	0.120728	11.3089	1.1855e-29	6.41714e-28
YLR258W	4136.15	0.877571	0.0777949	11.2806	1.63661e-29	8.78751e-28
YPL081W	1855.23	-1.07913	0.0958531	-11.2582	2.10991e-29	1.12382e-27
YIR039C	1449.14	1.23104	0.109402	11.2525	2.2509e-29	1.18941e-27
YPL211W	655.556	-1.17935	0.105103	-11.2209	3.21996e-29	1.68807e-27
YBR212W	3360.99	1.39451	0.124468	11.2038	3.90744e-29	2.03248e-27
YMR191W	1975.65	1.13191	0.101213	11.1835	4.91255e-29	2.53548e-27
YER156C	1394.39	-1.07869	0.0966361	-11.1624	6.22741e-29	3.18939e-27
YMR206W	1062.84	1.43715	0.128924	11.1472	7.39046e-29	3.75616e-27
YAL034C	1632.59	1.25213	0.112405	11.1394	8.06209e-29	4.06647e-27
YBR280C	1217.39	1.1388	0.102291	11.1329	8.67297e-29	4.3417e-27
YLR312C	1264.69	1.41124	0.126872	11.1234	9.65231e-29	4.7959e-27
YHR179W	9166.62	1.5612	0.140493	11.1123	1.09258e-28	5.38843e-27
YDR001C	5173.75	1.10717	0.0998095	11.0928	1.35931e-28	6.65463e-27
YBR092C	553.856	-2.0288	0.183706	-11.0437	2.35082e-28	1.14246e-26
YAL060W	4687.81	1.11352	0.100893	11.0366	2.54477e-28	1.22776e-26
YPL004C	13669.4	1.04804	0.0950566	11.0254	2.8826e-28	1.38074e-26
YJR149W	777.812	1.07379	0.0975388	11.0088	3.46578e-28	1.64823e-26
YNL160W	6560.31	1.85357	0.168553	10.997	3.95255e-28	1.86639e-26
YLR081W	52160.3	1.52191	0.138627	10.9785	4.85143e-28	2.27471e-26
YDR178W	3800.7	1.20409	0.109707	10.9755	5.01245e-28	2.33377e-26
YML054C	6521.55	2.19108	0.20013	10.9483	6.77217e-28	3.13119e-26
YFL056C	403.987	2.59991	0.237526	10.9458	6.96244e-28	3.19696e-26
YMR174C	617.644	1.59337	0.1456	10.9435	7.13877e-28	3.25548e-26
YJL163C	702.367	1.21066	0.110776	10.9289	8.38682e-28	3.7986e-26
YPL256C	336.57	-1.46623	0.134321	-10.9159	9.68039e-28	4.35487e-26
YLR080W	910.824	1.11077	0.101768	10.9147	9.81014e-28	4.38362e-26
YNR001C	14443.8	1.19035	0.109112	10.9095	1.03833e-27	4.60881e-26
YOL052C-A	4623.45	1.64213	0.150609	10.9032	1.11215e-27	4.90378e-26
YOR185C	1493.21	1.22404	0.112374	10.8926	1.25047e-27	5.47739e-26
YJL190C	12914.7	-1.28427	0.117998	-10.8838	1.37692e-27	5.99186e-26
YLR152C	1009.3	1.36458	0.125535	10.8701	1.60034e-27	6.91889e-26
YHR216W	2639.09	1.79672	0.166487	10.792	3.75722e-27	1.61391e-25
YLR267W	2033.42	0.977767	0.0907235	10.7774	4.39985e-27	1.87783e-25
YKL154W	291.542	-1.45134	0.134801	-10.7666	4.95139e-27	2.09977e-25
YBR089W	236.556	-1.90397	0.176986	-10.7577	5.44853e-27	2.29597e-25
YKR042W	23555.6	1.38192	0.128476	10.7563	5.53734e-27	2.31872e-25
YDR354W	1142.95	-1.00341	0.0934598	-10.7363	6.87552e-27	2.86108e-25
YEL057C	1642.52	1.4684	0.136965	10.721	8.11164e-27	3.35449e-25
YDR085C	2578.8	0.874209	0.0815863	10.7152	8.6415e-27	3.52976e-25
YIL018W	22856.6	-0.81036	0.0756269	-10.7152	8.63401e-27	3.52976e-25
YOR153W	10099.9	3.47013	0.324282	10.701	1.00722e-26	4.08906e-25
YBL028C	618.234	-1.59441	0.149557	-10.6609	1.55111e-26	6.25896e-25
YPL230W	3091.05	1.39111	0.130511	10.6589	1.5841e-26	6.35359e-25
YJL216C	218.334	2.27357	0.213316	10.6582	1.59635e-26	6.36436e-25
YNL055C	10732.9	1.18677	0.111453	10.6481	1.77906e-26	7.05058e-25
YLR136C	253.523	1.90506	0.179114	10.636	2.02584e-26	7.98108e-25
YLR174W	4186.24	1.89152	0.178328	10.607	2.76627e-26	1.0834e-24
YBL015W	4970.46	1.48831	0.140323	10.6063	2.78594e-26	1.08473e-24
YNR067C	1031.3	-1.16062	0.10951	-10.5983	3.03424e-26	1.17453e-24
YML042W	1179.99	1.53231	0.14477	10.5844	3.51905e-26	1.35433e-24
YOR019W	2907.08	1.00457	0.0951672	10.5558	4.77431e-26	1.82686e-24
YBR053C	1591.84	1.01327	0.0960423	10.5503	5.06547e-26	1.92719e-24
YKL035W	10445	0.993271	0.0942805	10.5353	5.94067e-26	2.24733e-24
YFR017C	2079.07	1.41259	0.134407	10.5098	7.7856e-26	2.92862e-24
YBR244W	693.217	-1.69514	0.161639	-10.4872	9.89522e-26	3.70126e-24
YDR516C	11933.9	0.947104	0.090376	10.4796	1.07205e-25	3.96538e-24
YOR222W	2080.01	-1.05962	0.101107	-10.4801	1.06636e-25	3.96538e-24
YJL122W	391.328	-1.4578	0.139144	-10.4769	1.10321e-25	4.05809e-24
YKL026C	1453	1.21139	0.115826	10.4587	1.33744e-25	4.8927e-24
YKR050W	466.01	1.38936	0.132872	10.4564	1.3703e-25	4.98548e-24
YCL040W	32231.3	1.31713	0.126016	10.4521	1.43306e-25	5.18549e-24
YBR222C	1752.49	1.22563	0.117731	10.4104	2.2225e-25	7.99858e-24
YNL075W	732.092	-1.3683	0.131548	-10.4015	2.44033e-25	8.73534e-24
YNL241C	4856.78	1.5825	0.152543	10.3741	3.25255e-25	1.15805e-23
YAL003W	7260.01	-0.985771	0.0951846	-10.3564	3.91398e-25	1.38613e-23
YJL066C	1213.13	1.21179	0.11727	10.3333	4.98228e-25	1.75513e-23
YDR399W	554.814	-1.15025	0.111351	-10.3299	5.16018e-25	1.80823e-23
YMR202W	3201.61	-0.973198	0.0942271	-10.3282	5.25295e-25	1.83111e-23
YPL201C	206.462	1.84943	0.179151	10.3233	5.52799e-25	1.90701e-23
YPR026W	1334.07	1.13303	0.109752	10.3235	5.51478e-25	1.90701e-23
YPR110C	1862.51	-0.958271	0.0928642	-10.3191	5.7787e-25	1.98323e-23
YCL025C	2865.39	-1.77359	0.171937	-10.3154	6.00592e-25	2.05064e-23
YDL208W	2041.75	-1.03588	0.100437	-10.3137	6.10818e-25	2.07491e-23
YHL035C	964.927	0.941183	0.091404	10.297	7.27202e-25	2.45772e-23
YMR081C	5900.31	0.900085	0.0874193	10.2962	7.33108e-25	2.46517e-23
YDR070C	2561.18	1.49342	0.14523	10.2832	8.39363e-25	2.80828e-23
YJR008W	2677.3	0.965461	0.0939505	10.2763	9.01446e-25	3.00091e-23
YLR044C	96238.7	0.746521	0.0726709	10.2726	9.36195e-25	3.10109e-23
YBR104W	632.364	-1.09697	0.106853	-10.2661	1.00122e-24	3.30007e-23
YHR144C	247.646	-1.56477	0.152503	-10.2606	1.06079e-24	3.4792e-23
YML091C	4518.21	1.01258	0.0986975	10.2595	1.07298e-24	3.50191e-23
YKR098C	1226.23	1.08222	0.105562	10.252	1.15942e-24	3.74728e-23
YOL032W	1668.85	1.19952	0.116999	10.2524	1.15444e-24	3.74728e-23
YMR241W	1436.13	-1.07607	0.105087	-10.2397	1.31595e-24	4.23265e-23
YFL044C	886.243	1.26667	0.123862	10.2265	1.50856e-24	4.82884e-23
YGR127W	639.811	1.08104	0.105852	10.2128	1.73727e-24	5.53431e-23
YMR193C-A	143.79	-1.64883	0.162051	-10.1748	2.57044e-24	8.14953e-23
YDR148C	4443.55	1.29566	0.127499	10.1622	2.92546e-24	9.23114e-23
YBR088C	315.187	-1.93225	0.190236	-10.1571	3.08095e-24	9.67592e-23
YMR090W	2292.75	1.37544	0.135733	10.1335	3.92516e-24	1.22693e-22
YNL014W	426.86	1.57244	0.155215	10.1307	4.0365e-24	1.25584e-22
YMR165C	1624.28	0.99255	0.0980596	10.1219	4.41742e-24	1.36796e-22
YJR045C	7900.85	1.82537	0.180386	10.1193	4.53863e-24	1.39899e-22
YER174C	648.904	-1.20033	0.118882	-10.0968	5.70914e-24	1.75168e-22
YOL047C	575.756	1.23426	0.122357	10.0874	6.28334e-24	1.91901e-22
YMR104C	5550.97	0.942486	0.0934649	10.0838	6.51239e-24	1.97988e-22
YJR095W	1718.63	1.80758	0.180064	10.0386	1.03177e-23	3.1225e-22
YNR034W-A	9823.7	1.46861	0.146396	10.0318	1.10504e-23	3.32911e-22
YAR073W	496.827	1.67928	0.167418	10.0305	1.11949e-23	3.35745e-22
YOR212W	1147.74	-1.00093	0.0998718	-10.0221	1.21837e-23	3.63764e-22
YNL007C	3972.55	1.52073	0.151819	10.0168	1.28648e-23	3.82383e-22
YGR032W	2689.71	1.1388	0.113728	10.0133	1.33198e-23	3.94148e-22
YPL227C	317.091	-1.42397	0.142618	-9.98452	1.78154e-23	5.24845e-22
YNL117W	2335.01	1.88482	0.18896	9.97467	1.96753e-23	5.77085e-22
YDL169C	1417.03	1.20863	0.121235	9.96936	2.07567e-23	6.06131e-22
YIL045W	981.673	0.902595	0.09069	9.95253	2.45861e-23	7.14823e-22
YOR143C	245.74	-1.81531	0.182553	-9.94401	2.6782e-23	7.7528e-22
YOR347C	1592.72	0.903328	0.0908686	9.94104	2.75936e-23	7.95317e-22
YKL150W	8926.66	1.24015	0.125143	9.90992	3.76961e-23	1.08181e-21
YIL172C	647.716	1.86564	0.1885	9.89726	4.27831e-23	1.21731e-21
YJL221C	647.716	1.86564	0.1885	9.89726	4.27831e-23	1.21731e-21
YOR227W	1768.8	1.09158	0.110343	9.8926	4.4825e-23	1.26998e-21
YKL107W	195.48	1.50282	0.152119	9.87923	5.12235e-23	1.44511e-21
YJL155C	3059.29	0.8174	0.0831068	9.83554	7.91452e-23	2.22341e-21
YDR077W	56005	0.961417	0.0978087	9.82957	8.3978e-23	2.34927e-21
YPL222W	1181.07	1.2474	0.127254	9.80241	1.09934e-22	3.06252e-21
YER073W	712.146	-1.4024	0.143133	-9.79787	1.14982e-22	3.1898e-21
YPL247C	1445.69	1.02422	0.104637	9.78832	1.2638e-22	3.49144e-21
YLL028W	534.781	1.7171	0.175564	9.78049	1.36547e-22	3.75673e-21
YDR321W	673.856	-1.05475	0.107867	-9.77829	1.39547e-22	3.82348e-21
YBR026C	2406.25	0.821668	0.0840893	9.77137	1.49411e-22	4.06033e-21
YLL024C	8202.06	1.68596	0.172535	9.77167	1.48979e-22	4.06033e-21
YLR372W	1035.1	-1.2989	0.133118	-9.75745	1.71407e-22	4.63913e-21
YNL115C	1499.18	1.10881	0.113658	9.75565	1.74486e-22	4.70335e-21
YPR160W-A	301.93	1.6098	0.165303	9.73851	2.0657e-22	5.54575e-21
YBR158W	563.939	-1.26005	0.129436	-9.73497	2.13886e-22	5.71908e-21
YJL067W	705.476	1.2035	0.123846	9.71767	2.53526e-22	6.75191e-21
YGR224W	288.229	1.53332	0.158123	9.697	3.10506e-22	8.23645e-21
YDL179W	390.735	-1.52844	0.157997	-9.67389	3.89292e-22	1.02447e-20
YLR363W-A	326.14	-1.28882	0.133224	-9.67408	3.88573e-22	1.02447e-20
YOR374W	10430	0.95041	0.0982915	9.6693	4.07152e-22	1.06725e-20
YLL041C	3538.75	1.27038	0.1314	9.66805	4.1214e-22	1.07609e-20
YDL236W	1665.85	-1.00206	0.103712	-9.66193	4.37559e-22	1.138e-20
YMR181C	1623.21	1.00124	0.103727	9.65262	4.79171e-22	1.24137e-20
YOR004W	454.061	-1.28173	0.133133	-9.62745	6.12277e-22	1.58005e-20
YMR110C	4293.18	0.934648	0.0970941	9.62621	6.1971e-22	1.59306e-20
YOR027W	5308.46	1.6184	0.168382	9.61149	7.15099e-22	1.8312e-20
YKR039W	4133.45	-1.89651	0.197359	-9.60946	7.29333e-22	1.8605e-20
YFL042C	1724.19	0.986696	0.102691	9.60844	7.36594e-22	1.87185e-20
YGL123W	43275.5	-0.746728	0.0777808	-9.60041	7.96264e-22	2.01579e-20
YDL020C	3733.76	1.526	0.158982	9.59857	8.10588e-22	2.04428e-20
YPL186C	1557.75	1.16027	0.121049	9.58515	9.23247e-22	2.31961e-20
YNL066W	499.39	-1.18044	0.123231	-9.57906	9.79353e-22	2.45133e-20
YNL188W	385.316	-1.29496	0.135274	-9.57282	1.04024e-21	2.59397e-20
YDL214C	344.958	1.22957	0.128456	9.57196	1.04897e-21	2.60599e-20
YDR091C	703.183	-1.21768	0.127327	-9.56343	1.13912e-21	2.81942e-20
YMR008C	2514.93	0.88723	0.0928536	9.55515	1.23405e-21	3.04308e-20
YBR286W	13046.7	0.766898	0.0803041	9.54993	1.29785e-21	3.18859e-20
YPL119C	408.421	1.19416	0.125119	9.54418	1.37186e-21	3.35802e-20
YGR159C	1129.75	-1.22023	0.127876	-9.54225	1.39771e-21	3.40878e-20
YBR214W	4893.37	0.976301	0.102556	9.51974	1.73618e-21	4.21879e-20
YOR040W	707.573	0.914046	0.0960602	9.51534	1.81116e-21	4.38499e-20
YGR148C	12918.9	-0.755435	0.0794707	-9.50583	1.98463e-21	4.78757e-20
YOR049C	801.681	1.4637	0.15402	9.50328	2.03374e-21	4.88831e-20
YDL130W-A	2694.47	1.16058	0.12214	9.50207	2.05752e-21	4.92769e-20
YIR038C	1221.32	1.06248	0.111831	9.50076	2.08358e-21	4.9722e-20
YKL133C	1461.11	1.10753	0.116636	9.49565	2.1884e-21	5.20371e-20
YBL032W	869.579	-0.915511	0.0966565	-9.4718	2.75071e-21	6.51751e-20
YNL141W	1077.24	-1.08623	0.115099	-9.43734	3.82374e-21	9.02781e-20
YLR259C	6941.17	1.56056	0.165521	9.42814	4.1741e-21	9.8202e-20
YBR187W	695.773	-1.33374	0.141609	-9.41851	4.57516e-21	1.07259e-19
YDR032C	2939.4	0.926417	0.0985126	9.40404	5.25051e-21	1.22659e-19
YLR420W	1922.81	-1.06345	0.113299	-9.38619	6.22073e-21	1.44817e-19
YPR155C	1164.62	0.906069	0.0966032	9.37929	6.64194e-21	1.54084e-19
YOL158C	604.878	1.01819	0.108708	9.36629	7.51283e-21	1.73682e-19
YGL123C-A	18155.4	-0.793476	0.0847338	-9.36434	7.65248e-21	1.76298e-19
YBR018C	58416.4	1.16779	0.124735	9.36221	7.80866e-21	1.79276e-19
YEL021W	3081.59	-0.925455	0.099489	-9.30209	1.37715e-20	3.15088e-19
YPL006W	1068.76	0.864651	0.0930237	9.29495	1.47279e-20	3.35817e-19
YMR195W	2173.53	-0.850179	0.0915646	-9.28502	1.61679e-20	3.67391e-19
YDL199C	521.199	1.05581	0.113917	9.26824	1.8925e-20	4.28581e-19
YGL029W	163.468	-1.56356	0.16948	-9.22564	2.81877e-20	6.36182e-19
YIL033C	4703.42	0.883996	0.0958849	9.21934	2.98925e-20	6.72379e-19
YPL262W	4230.59	1.07109	0.116245	9.21411	3.13873e-20	7.03625e-19
YDR146C	344.024	-1.34257	0.145721	-9.21331	3.16211e-20	7.06487e-19
YIL107C	1725.64	0.886121	0.0963474	9.19715	3.67572e-20	8.18493e-19
YNL045W	1739.6	0.931208	0.101398	9.18366	4.16676e-20	9.24742e-19
YMR297W	6952.78	1.00666	0.109668	9.17918	4.34383e-20	9.60837e-19
YDR216W	4489.14	1.24605	0.135961	9.16473	4.96703e-20	1.09505e-18
YCL049C	1788.86	0.815896	0.0890926	9.15784	5.29452e-20	1.1634e-18
YNL015W	2328.73	0.940671	0.10289	9.14248	6.10379e-20	1.33681e-18
YBR189W	30678.2	-0.711072	0.077813	-9.13822	6.34866e-20	1.38588e-18
YBR181C	20577.3	-0.811745	0.0888748	-9.13358	6.62725e-20	1.44197e-18
YIL101C	1486.1	1.14312	0.1252	9.13038	6.82606e-20	1.48039e-18
YHR008C	5708.12	1.24809	0.136829	9.12157	7.40418e-20	1.60055e-18
YMR215W	885.446	-1.22231	0.134014	-9.12075	7.46029e-20	1.60746e-18
YPL157W	198.976	-1.40627	0.15434	-9.11152	8.12372e-20	1.74477e-18
YML120C	7075.2	1.27087	0.139494	9.11058	8.19429e-20	1.75426e-18
YOR264W	742.237	-1.16305	0.127795	-9.10088	8.96014e-20	1.91207e-18
YPL203W	2446.07	0.760635	0.0835986	9.09866	9.14555e-20	1.9454e-18
YDR258C	4430.38	1.26956	0.139636	9.09192	9.73078e-20	2.0633e-18
YDL046W	3691.92	0.776097	0.0854547	9.08197	1.06624e-19	2.25367e-18
YKL071W	984.489	3.63702	0.400583	9.07931	1.09262e-19	2.3021e-18
YBR019C	32014.6	1.35394	0.14933	9.06675	1.22624e-19	2.57549e-18
YDL055C	8358.81	-0.938361	0.103504	-9.06589	1.23587e-19	2.58755e-18
YPL092W	463.575	-1.43631	0.158674	-9.05192	1.4048e-19	2.93203e-18
YGL197W	1316.72	1.06846	0.118078	9.04877	1.44584e-19	3.00825e-18
YMR280C	1739.23	0.944133	0.104646	9.02216	1.84424e-19	3.82521e-18
YOR228C	683.196	0.911322	0.101117	9.0126	2.01236e-19	4.16097e-18
YIL110W	318.788	-1.16972	0.129884	-9.00592	2.13871e-19	4.40852e-18
YDR224C	12464.3	-1.31074	0.145831	-8.98807	2.51611e-19	5.17044e-18
YML100W	7684.2	1.07384	0.119546	8.98269	2.64236e-19	5.41318e-18
YDL019C	2157.63	0.868899	0.0968054	8.97574	2.81465e-19	5.74845e-18
YLR295C	4032.05	0.801931	0.0894028	8.96987	2.96875e-19	6.04462e-18
YIL118W	664.511	-1.01095	0.112943	-8.951	3.52282e-19	7.13999e-18
YLR285C-A	168.65	-1.51127	0.168841	-8.95083	3.52817e-19	7.13999e-18
YLR270W	3044.59	0.81596	0.0911665	8.95021	3.54806e-19	7.15848e-18
YOL100W	1517.63	1.14051	0.127716	8.93002	4.25933e-19	8.56756e-18
YMR093W	131.626	-1.55684	0.174382	-8.9278	4.34558e-19	8.71471e-18
YJL103C	1372.13	0.850244	0.0952706	8.92452	4.47623e-19	8.94978e-18
YKL148C	6511.62	1.27338	0.142741	8.92089	4.62542e-19	9.22038e-18
YDR423C	1462.54	0.924619	0.103709	8.91547	4.85745e-19	9.65399e-18
YDR059C	1017.18	1.25891	0.141334	8.90735	5.22687e-19	1.03573e-17
YPR060C	378.683	-1.10115	0.123873	-8.88934	6.14729e-19	1.2145e-17
YDR214W	3146.46	1.44436	0.162709	8.87694	6.87221e-19	1.3537e-17
YPL171C	1164.78	2.80323	0.31594	8.87268	7.14073e-19	1.40245e-17
YDR231C	961.237	0.957785	0.108047	8.8645	7.68491e-19	1.50489e-17
YLR327C	58810.1	1.20412	0.13585	8.86354	7.75123e-19	1.51342e-17
YGR160W	394.698	-1.24156	0.140232	-8.85359	8.47512e-19	1.64992e-17
YKR049C	1714.77	1.11092	0.125608	8.84436	9.20533e-19	1.78685e-17
YIL171W-A	112.253	2.00135	0.226326	8.84276	9.33821e-19	1.80214e-17
YJL220W	112.253	2.00135	0.226326	8.84276	9.33821e-19	1.80214e-17
YLR034C	635.112	1.32181	0.149503	8.84142	9.451e-19	1.81863e-17
YDR150W	1963.28	0.92147	0.104255	8.83862	9.69053e-19	1.85935e-17
YNL030W	12621.1	-1.57076	0.177808	-8.83404	1.00963e-18	1.93164e-17
YFL016C	1379.47	1.58176	0.179081	8.83266	1.0222e-18	1.95009e-17
YAL028W	398.259	1.0576	0.120074	8.80793	1.27477e-18	2.42497e-17
YOR006C	804.866	-1.08614	0.123359	-8.80477	1.31123e-18	2.48723e-17
YMR300C	150.785	-1.37813	0.157174	-8.76816	1.81606e-18	3.43503e-17
YJL082W	1475.47	0.884103	0.100979	8.75533	2.03515e-18	3.83854e-17
YOR328W	910.223	1.41717	0.1619	8.75337	2.07081e-18	3.89476e-17
YER149C	201.875	-1.28579	0.146961	-8.74922	2.14824e-18	4.02901e-17
YHR016C	1688.79	0.790938	0.0904288	8.74653	2.20015e-18	4.11478e-17
YBR154C	1621.52	-0.781439	0.089521	-8.72912	2.56669e-18	4.78684e-17
YIR032C	353.912	-1.42364	0.163147	-8.72614	2.63501e-18	4.90053e-17
YKR018C	2787.52	1.07449	0.123197	8.72173	2.73992e-18	5.08144e-17
YPL095C	351.499	-1.12147	0.128619	-8.71928	2.79976e-18	5.178e-17
YJL200C	2693.01	-1.50754	0.173017	-8.71325	2.95277e-18	5.44586e-17
YKL096W	3928.12	0.934854	0.107326	8.71039	3.0282e-18	5.56955e-17
YHR160C	343.593	1.18775	0.136477	8.70297	3.23309e-18	5.93e-17
YAR075W	150.602	1.69323	0.194638	8.6994	3.33651e-18	6.10288e-17
YDL124W	7688.64	0.855445	0.098338	8.69903	3.34742e-18	6.10606e-17
YDL243C	534.911	1.53347	0.176657	8.68052	3.9395e-18	7.16183e-17
YJR025C	3069.26	1.14158	0.131514	8.68029	3.94772e-18	7.16183e-17
YBR126C	10593.8	1.04913	0.120879	8.67915	3.98748e-18	7.21431e-17
YBR139W	3531.4	0.753634	0.0869652	8.66593	4.47862e-18	8.08093e-17
YHL046W-A	109.555	1.54162	0.178002	8.6607	4.68894e-18	8.43756e-17
YBL099W	7352.27	1.29588	0.14974	8.65415	4.96611e-18	8.91222e-17
YKR097W	5807.06	1.47917	0.170973	8.65151	5.08237e-18	9.09635e-17
YPL134C	1221.43	0.991863	0.11474	8.64443	5.40757e-18	9.65244e-17
YBR043C	1270.99	-0.990245	0.114643	-8.63763	5.73899e-18	1.02166e-16
YGR065C	345.882	-1.10468	0.127907	-8.63661	5.79061e-18	1.0281e-16
YLR012C	77.135	2.02242	0.234651	8.61885	6.76322e-18	1.19759e-16
YDR075W	266.577	-1.15291	0.133936	-8.60791	7.44037e-18	1.314e-16
YJL088W	964.278	-1.17503	0.136529	-8.60649	7.53336e-18	1.32691e-16
YLL055W	982.996	1.18842	0.138192	8.59978	7.98725e-18	1.40314e-16
YOL099C	418.2	1.37974	0.160527	8.59501	8.32541e-18	1.4587e-16
YMR123W	807.513	-0.965939	0.112425	-8.59183	8.55919e-18	1.49572e-16
YOL077C	1980.4	-0.918828	0.107129	-8.57684	9.75123e-18	1.69957e-16
YGR271C-A	433.171	-1.41279	0.164772	-8.57417	9.98028e-18	1.73495e-16
YKR060W	392.941	-1.16955	0.136413	-8.5736	1.00299e-17	1.73904e-16
YLR183C	249.03	-1.53736	0.179424	-8.5683	1.05028e-17	1.81631e-16
YLR029C	58459	-1.19537	0.139737	-8.55441	1.18472e-17	2.04348e-16
YBR001C	1023.91	0.994582	0.116539	8.53431	1.41e-17	2.41952e-16
YKL151C	2032.84	0.919617	0.107755	8.53435	1.40946e-17	2.41952e-16
YFL052W	565.492	1.25843	0.147601	8.5259	1.51625e-17	2.59517e-16
YLL029W	4098.78	1.00332	0.11787	8.51215	1.70743e-17	2.91489e-16
YBL039C	553.304	-1.14714	0.134963	-8.49969	1.90099e-17	3.23703e-16
YDR234W	1704.99	-1.32625	0.156101	-8.4961	1.96064e-17	3.3301e-16
YPR118W	827.018	-1.16643	0.137366	-8.49137	2.04208e-17	3.45958e-16
YOL121C	5747.31	-0.865566	0.101946	-8.49048	2.05791e-17	3.47755e-16
YDL215C	7944.09	1.05102	0.123849	8.48632	2.13281e-17	3.58717e-16
YDR358W	1539.78	0.84579	0.0996656	8.48628	2.13356e-17	3.58717e-16
YCL018W	140294	-0.851411	0.100393	-8.48078	2.23686e-17	3.75138e-16
YNL031C	20296	-1.1439	0.135196	-8.46106	2.64964e-17	4.43249e-16
YOL128C	213.163	-1.21348	0.143503	-8.4561	2.76471e-17	4.61339e-16
YAL062W	440.411	1.10934	0.131224	8.45378	2.82031e-17	4.69441e-16
YHL003C	1148.54	-1.02062	0.120771	-8.45085	2.89181e-17	4.80142e-16
YMR121C	2461.37	-0.997932	0.118097	-8.45008	2.91104e-17	4.82132e-16
YIL057C	1576.98	1.43239	0.169602	8.4456	3.0248e-17	4.9973e-16
YJR069C	283.3	-1.18021	0.139809	-8.44154	3.13186e-17	5.16137e-16
YLR460C	57.2345	2.25323	0.267063	8.43708	3.25372e-17	5.34896e-16
YOR386W	1437.5	0.760519	0.0901796	8.43338	3.35816e-17	5.50705e-16
YLL019C	2095.43	1.03969	0.123331	8.43007	3.45467e-17	5.6514e-16
YER143W	1949.16	0.968711	0.114923	8.42923	3.47937e-17	5.67785e-16
YJL137C	703.902	0.888269	0.105586	8.41277	4.00456e-17	6.51892e-16
YDR230W	738.778	0.943343	0.112188	8.40858	4.1499e-17	6.73904e-16
YDR339C	1498.66	-0.898295	0.10684	-8.40784	4.17638e-17	6.76554e-16
YPL154C	6572.62	0.893869	0.106585	8.38647	5.00939e-17	8.09527e-16
YJL196C	782.439	-0.811272	0.0968151	-8.37959	5.31101e-17	8.56192e-16
YJL213W	1264.54	0.973375	0.116194	8.37717	5.42158e-17	8.71906e-16
YJL148W	606.893	-1.11563	0.133197	-8.37573	5.48807e-17	8.80472e-16
YIL069C	8944.09	-0.719956	0.0860539	-8.36634	5.94353e-17	9.51251e-16
YMR144W	160.581	-1.37889	0.164877	-8.36315	6.10639e-17	9.74972e-16
YLL040C	1802.95	0.786119	0.0940576	8.35785	6.38737e-17	1.01739e-15
YNR060W	375.614	1.26152	0.151103	8.34875	6.89908e-17	1.09628e-15
YGL062W	6279.08	1.10888	0.13301	8.33686	7.62908e-17	1.20939e-15
YNL096C	4074.24	-0.747594	0.0898867	-8.31708	9.01604e-17	1.42586e-15
YDR297W	984.722	-0.950191	0.114258	-8.31618	9.08416e-17	1.43323e-15
YJR145C	18418.6	-0.581605	0.0699403	-8.31574	9.11836e-17	1.43523e-15
YGR141W	1292.29	0.75698	0.0911196	8.30754	9.7703e-17	1.53421e-15
YPL196W	1786.52	0.816462	0.0984872	8.29003	1.13215e-16	1.77362e-15
YGL036W	1663.42	0.781503	0.0944229	8.27662	1.26719e-16	1.98051e-15
YNL333W	425.191	0.908094	0.109758	8.27359	1.29987e-16	2.02682e-15
YFL059W	419.705	0.93508	0.113063	8.27043	1.33474e-16	2.07633e-15
YGR108W	298.938	-1.51649	0.183527	-8.26306	1.4198e-16	2.20351e-15
YBR010W	11412	-1.45827	0.17668	-8.25373	1.53529e-16	2.3772e-15
YKR081C	1085.05	-0.887378	0.107747	-8.23575	1.78439e-16	2.7565e-15
YPR158W	438.133	1.51289	0.183747	8.23354	1.81765e-16	2.80137e-15
YOR384W	486.424	1.13311	0.137633	8.23284	1.8283e-16	2.81128e-15
YDR330W	1455.81	0.970348	0.117932	8.22803	1.90322e-16	2.91974e-15
YPR035W	7173.95	-1.26938	0.154287	-8.22736	1.91385e-16	2.92929e-15
YGL070C	515.711	-0.958232	0.116496	-8.22548	1.94416e-16	2.96885e-15
YDR471W	8446.1	-0.797151	0.0970095	-8.21725	2.08229e-16	3.17251e-15
YMR219W	1498.49	0.886779	0.108054	8.20681	2.27144e-16	3.45279e-15
YOR058C	689.975	1.1731	0.143004	8.20331	2.3386e-16	3.5468e-15
YOL124C	230.354	-1.41151	0.172197	-8.19706	2.46341e-16	3.72759e-15
YLR356W	691.555	0.919082	0.112134	8.19632	2.47863e-16	3.74211e-15
YDR418W	17280	-0.862126	0.105263	-8.19021	2.60762e-16	3.92794e-15
YPR051W	226.386	-1.18957	0.145255	-8.18952	2.6228e-16	3.94189e-15
YPR191W	7301.06	1.11936	0.136689	8.18908	2.63234e-16	3.94732e-15
YLR206W	2880.23	0.785055	0.0960265	8.1754	2.94878e-16	4.4119e-15
YOR283W	716.037	-0.874773	0.107045	-8.17201	3.03289e-16	4.52757e-15
YLR301W	654.316	-1.04187	0.127556	-8.16798	3.13588e-16	4.67085e-15
YIL160C	445.577	1.18971	0.145751	8.16262	3.27839e-16	4.87221e-15
YIL133C	10231	-0.61302	0.0752322	-8.14837	3.68867e-16	5.46874e-15
YPR075C	1883.5	0.723825	0.0888333	8.14812	3.69621e-16	5.46874e-15
YER045C	668.251	1.25925	0.154582	8.14618	3.75589e-16	5.54472e-15
YPL090C	23123.4	-0.734706	0.0902092	-8.14447	3.80951e-16	5.61144e-15
YPR091C	1078.4	0.853983	0.10497	8.13549	4.10292e-16	6.03029e-15
YLR217W	931.506	1.04057	0.127933	8.13371	4.16347e-16	6.10581e-15
YCR043C	487.542	-1.2848	0.158119	-8.12553	4.45397e-16	6.51747e-15
YGL077C	581.108	-0.878112	0.108114	-8.1221	4.58192e-16	6.69001e-15
YNR064C	273.211	-1.68414	0.207413	-8.11972	4.67258e-16	6.80744e-15
YMR194W	5169.42	-0.920322	0.113629	-8.09934	5.52595e-16	8.03314e-15
YGL121C	1015.05	1.32692	0.1639	8.09589	5.68485e-16	8.24613e-15
YKL085W	7361.14	0.847098	0.104649	8.09467	5.74202e-16	8.31095e-15
YPR187W	1851.24	-0.895988	0.110739	-8.09098	5.91859e-16	8.54794e-15
YPL109C	626.093	0.872509	0.107906	8.08582	6.1749e-16	8.89881e-15
YER049W	783.027	-1.01636	0.12571	-8.08496	6.21823e-16	8.9419e-15
YOL157C	569.996	1.4617	0.180867	8.08162	6.391e-16	9.17053e-15
YJR121W	18293.3	1.01589	0.125734	8.07966	6.49478e-16	9.29941e-15
YGR152C	565.401	-1.27129	0.157351	-8.07932	6.51299e-16	9.30547e-15
YOL081W	2411.01	0.984426	0.121883	8.07682	6.64791e-16	9.47789e-15
YER031C	989.987	-0.919528	0.113885	-8.07419	6.79251e-16	9.66336e-15
YKL104C	3057.09	0.892375	0.110563	8.07116	6.96323e-16	9.88512e-15
YNL305C	2071.21	0.738512	0.0915661	8.06535	7.30267e-16	1.03449e-14
YOL149W	691.211	-0.907751	0.112589	-8.06254	7.47251e-16	1.05631e-14
YIR034C	4196.04	-1.0154	0.125951	-8.06188	7.51293e-16	1.05977e-14
YNL089C	257.314	-1.15423	0.143177	-8.06156	7.5327e-16	1.06031e-14
YGR282C	15907.8	0.794273	0.0985506	8.05955	7.65777e-16	1.07564e-14
YOR391C	165.676	1.66511	0.206614	8.059	7.6918e-16	1.07815e-14
YDR417C	12015	-0.888838	0.110327	-8.05641	7.85706e-16	1.099e-14
YEL011W	10239.7	0.616876	0.0765918	8.05407	8.00843e-16	1.11782e-14
YHR085W	178.853	-1.29712	0.1611	-8.05163	8.17007e-16	1.13562e-14
YMR318C	5811.42	1.38907	0.172516	8.05185	8.15548e-16	1.13562e-14
YPR050C	184.834	-1.23055	0.152942	-8.04588	8.56313e-16	1.18778e-14
YLR404W	214.029	-1.15859	0.144028	-8.04425	8.6778e-16	1.20118e-14
YKL006W	10594.7	-0.908356	0.113053	-8.03475	9.37727e-16	1.29531e-14
YNL300W	278.19	-1.10277	0.137329	-8.03009	9.7403e-16	1.34267e-14
YER055C	1632.33	-0.776063	0.096832	-8.01453	1.10562e-15	1.52091e-14
YDR225W	10209.1	-1.05258	0.131443	-8.00786	1.16725e-15	1.60238e-14
YIR012W	439.917	-0.979521	0.12234	-8.00657	1.17952e-15	1.61589e-14
YIL097W	1467.35	0.681705	0.0851544	8.00552	1.18963e-15	1.62639e-14
YPR015C	259.253	1.16579	0.145648	8.00412	1.20323e-15	1.64162e-14
YHR052W	895.988	-1.06244	0.132783	-8.00134	1.23071e-15	1.67568e-14
YER056C	1587.64	-1.03281	0.129109	-7.99957	1.24858e-15	1.69654e-14
YBR117C	380.065	1.2071	0.150955	7.99641	1.28096e-15	1.73699e-14
YDL201W	702.331	-0.854146	0.106942	-7.98703	1.38228e-15	1.87057e-14
YIL155C	4572.55	1.17435	0.147036	7.98678	1.38512e-15	1.87061e-14
YHR072W-A	3619.71	-1.26204	0.158149	-7.98007	1.46249e-15	1.9711e-14
YIL121W	466.975	0.871071	0.109202	7.97673	1.50262e-15	2.0211e-14
YLR390W-A	7776.95	0.903025	0.113309	7.96961	1.59177e-15	2.13669e-14
YAL017W	1898.53	0.940384	0.118034	7.96704	1.6252e-15	2.17718e-14
YKR016W	2645.79	0.837967	0.105236	7.96277	1.68234e-15	2.2492e-14
YJR003C	393.424	-0.94585	0.118924	-7.95338	1.81493e-15	2.4216e-14
YOR369C	42546.7	-1.04682	0.131748	-7.94561	1.93243e-15	2.57323e-14
YEL029C	275.021	-1.33354	0.167869	-7.94393	1.95867e-15	2.60296e-14
YLR003C	888.225	-0.791464	0.0997644	-7.93333	2.13345e-15	2.82958e-14
YPR192W	288.37	1.38321	0.174448	7.92909	2.20766e-15	2.92218e-14
YJL110C	1033.71	-1.02472	0.129273	-7.9268	2.2486e-15	2.97047e-14
YBL045C	7910.83	1.03003	0.130085	7.91811	2.4115e-15	3.17936e-14
YNL248C	544.319	-1.25748	0.158844	-7.91646	2.44372e-15	3.21547e-14
YNL166C	444.483	-1.10791	0.140278	-7.89791	2.83629e-15	3.72466e-14
YBR008C	505.503	1.43453	0.181646	7.89738	2.84818e-15	3.73291e-14
YBR050C	668.627	1.08847	0.137938	7.89097	2.99852e-15	3.92222e-14
YNL046W	1219.33	-1.5744	0.199821	-7.87908	3.29803e-15	4.30555e-14
YCR061W	505.748	1.20451	0.153042	7.87044	3.53396e-15	4.60452e-14
YKL036C	240.734	1.05292	0.133966	7.85963	3.8526e-15	5.00988e-14
YHR199C	1537.07	0.899347	0.114575	7.8494	4.18045e-15	5.42562e-14
YGR264C	1088.8	-1.05591	0.134779	-7.83435	4.71277e-15	6.1046e-14
YMR307W	5232.79	-0.890817	0.113728	-7.83284	4.7696e-15	6.16621e-14
YIL108W	1011.2	0.772629	0.0986946	7.82848	4.93803e-15	6.35927e-14
YML004C	4722.57	0.600097	0.0766535	7.8287	4.92949e-15	6.35927e-14
YOL096C	661.671	0.783505	0.100157	7.8228	5.16607e-15	6.6401e-14
YCR088W	2445.03	0.821659	0.105077	7.81963	5.29807e-15	6.79663e-14
YHL040C	255.276	1.19801	0.153307	7.81444	5.52079e-15	7.05517e-14
YOR246C	572.576	-0.97844	0.125207	-7.81458	5.51468e-15	7.05517e-14
YOL143C	3429.17	-1.07597	0.137711	-7.81328	5.57167e-15	7.10655e-14
YBR087W	822.911	-1.22199	0.156543	-7.80611	5.89813e-15	7.50855e-14
YDR245W	995.416	-0.827921	0.106123	-7.80151	6.11717e-15	7.77254e-14
YMR173W	9951.53	0.905751	0.116123	7.79995	6.19331e-15	7.8543e-14
YKL187C	561.36	1.27776	0.163877	7.79709	6.33529e-15	8.01907e-14
YKL181W	2529.57	-0.691402	0.0886794	-7.79665	6.35726e-15	8.03162e-14
YPL036W	346.743	1.49013	0.19119	7.79399	6.49268e-15	8.18717e-14
YKR067W	1296.02	0.839071	0.107707	7.79029	6.68564e-15	8.41455e-14
YNL110C	1067.89	-1.05549	0.135535	-7.78757	6.83082e-15	8.58106e-14
YLR304C	8065.58	1.04322	0.133988	7.78592	6.92081e-15	8.66142e-14
YNR068C	549.911	1.12695	0.144738	7.78614	6.90856e-15	8.66142e-14
YER016W	631.652	-0.895424	0.115017	-7.78513	6.9639e-15	8.69899e-14
YJL206C	571.175	0.815335	0.104772	7.78197	7.14031e-15	8.90266e-14
YKR043C	1061.69	-1.04275	0.134064	-7.77802	7.36673e-15	9.1678e-14
YBR056W	3285.68	0.594258	0.0764427	7.7739	7.61075e-15	9.4538e-14
YDR410C	246.842	-1.02053	0.131356	-7.76914	7.90217e-15	9.79752e-14
YKL171W	1253.89	0.806078	0.103787	7.76665	8.05884e-15	9.97319e-14
YIL158W	295.654	-1.24743	0.16072	-7.76151	8.3923e-15	1.03666e-13
YGR130C	5827.62	0.662211	0.0853295	7.76064	8.45036e-15	1.03997e-13
YHL001W	5662.53	-0.844257	0.108785	-7.76079	8.44014e-15	1.03997e-13
YHR133C	464.391	-0.868597	0.111943	-7.75928	8.5415e-15	1.04925e-13
YLR089C	2335.6	0.920903	0.118883	7.7463	9.46084e-15	1.16004e-13
YGR140W	317.102	-0.938704	0.121233	-7.74296	9.71304e-15	1.18878e-13
YHR203C	16291.1	-0.540872	0.0698594	-7.7423	9.76349e-15	1.19276e-13
YJL020C	3099.9	0.869288	0.112383	7.73505	1.03365e-14	1.26045e-13
YJR065C	2652.8	0.864536	0.111781	7.73419	1.0406e-14	1.2666e-13
YBR269C	1617.01	0.725518	0.0938256	7.73263	1.0535e-14	1.27996e-13
YBR243C	387.303	-0.880721	0.114075	-7.72052	1.1586e-14	1.4051e-13
YOR065W	5701.94	1.11178	0.144014	7.71994	1.16385e-14	1.40889e-13
YMR322C	143.63	1.58991	0.206137	7.71287	1.23015e-14	1.48645e-13
YKL157W	2992.2	0.72613	0.0942099	7.70758	1.2823e-14	1.54666e-13
YML019W	625.825	-0.908378	0.117871	-7.70657	1.29245e-14	1.55608e-13
YMR173W-A	9004.43	0.910424	0.118275	7.6975	1.38754e-14	1.66455e-13
YPR030W	2553.51	0.980652	0.127396	7.69769	1.38551e-14	1.66455e-13
YML070W	2124.74	0.806124	0.104755	7.69534	1.41121e-14	1.6899e-13
YOL119C	2559.23	0.942074	0.122425	7.69508	1.41407e-14	1.69029e-13
YDR119W	674.938	-0.944267	0.122718	-7.69461	1.41928e-14	1.69347e-13
YOR210W	608.81	-1.09299	0.142164	-7.68819	1.49234e-14	1.77746e-13
YDR083W	670.178	-0.916735	0.119256	-7.6871	1.5051e-14	1.78946e-13
YMR124W	1505.21	0.753985	0.0980909	7.68659	1.51108e-14	1.79337e-13
YNL232W	1027.63	-0.687641	0.089591	-7.67534	1.64974e-14	1.95444e-13
YIL040W	250.702	-1.07459	0.140044	-7.67323	1.6772e-14	1.98344e-13
YIL016W	627.026	-1.25903	0.164089	-7.67289	1.68162e-14	1.98515e-13
YDR370C	287.086	-0.965083	0.125916	-7.66447	1.79566e-14	2.11602e-13
YBL100C	1762.25	1.0961	0.143022	7.66384	1.8045e-14	2.12226e-13
YML026C	19294.3	-0.90134	0.117612	-7.66364	1.80733e-14	2.12226e-13
YLR348C	559.404	-0.854263	0.111485	-7.66256	1.82268e-14	2.13651e-13
YDR264C	1612.35	0.667165	0.0871053	7.65929	1.86968e-14	2.18776e-13
YBR033W	663.95	0.7875	0.103005	7.64526	2.08528e-14	2.43576e-13
YOL071W	1336.49	0.88355	0.115659	7.63929	2.18418e-14	2.54681e-13
YBR149W	5998.31	0.668508	0.0875272	7.63772	2.21097e-14	2.57354e-13
YOL019W	776.587	-0.829504	0.108712	-7.63032	2.34167e-14	2.72091e-13
YEL020C	406.713	0.947776	0.124313	7.62411	2.45726e-14	2.85025e-13
YDL014W	2002.31	-0.873459	0.114635	-7.61949	2.54681e-14	2.94387e-13
YGR118W	13876.4	-0.782959	0.102756	-7.61957	2.54517e-14	2.94387e-13
YOR252W	1015.46	-0.817213	0.107265	-7.61864	2.56369e-14	2.95824e-13
YIL020C	477.418	-0.9518	0.125092	-7.60881	2.76623e-14	3.18643e-13
YHR089C	2811.88	-0.845656	0.111156	-7.60785	2.78683e-14	3.20462e-13
YLR333C	5423.07	-0.81467	0.107111	-7.60585	2.83047e-14	3.24918e-13
YKL164C	4807.18	-1.0639	0.139888	-7.60532	2.84198e-14	3.25678e-13
YGR030C	306.932	-1.00946	0.132767	-7.60328	2.8872e-14	3.30292e-13
YFR015C	6372.47	0.63285	0.0832633	7.60059	2.94783e-14	3.36649e-13
YJL057C	1187.92	0.683497	0.0899398	7.59949	2.97302e-14	3.38945e-13
YMR199W	239.249	-1.04507	0.137543	-7.59814	3.00425e-14	3.4192e-13
YHR209W	2878.4	0.77693	0.102281	7.59606	3.05274e-14	3.46845e-13
YGR231C	2282.2	0.813825	0.107163	7.5943	3.09465e-14	3.51008e-13
YNL145W	896.944	-1.01907	0.13423	-7.59196	3.15109e-14	3.56802e-13
YDR280W	742.308	-0.915606	0.120623	-7.59064	3.18331e-14	3.59839e-13
YJR151C	2179.98	1.21879	0.160724	7.5831	3.37385e-14	3.80731e-13
YOL012C	613.212	-0.812201	0.107116	-7.58243	3.39147e-14	3.82072e-13
YLL015W	1103.77	0.730774	0.0964334	7.57802	3.50876e-14	3.94618e-13
YBL031W	95.9732	-1.54005	0.203266	-7.57651	3.54983e-14	3.98562e-13
YDR524W-C	5015.91	-0.747876	0.0987768	-7.57137	3.69317e-14	4.13958e-13
YNR069C	588.538	1.0089	0.13327	7.57036	3.72183e-14	4.1647e-13
YBR030W	289.284	-1.02543	0.135588	-7.56288	3.94229e-14	4.40399e-13
YER178W	5730.42	0.944308	0.124865	7.56263	3.95008e-14	4.4053e-13
YOR152C	359.679	1.17548	0.155486	7.56003	4.02964e-14	4.48651e-13
YJR112W	332.398	-1.05175	0.139195	-7.55592	4.15898e-14	4.62279e-13
YBR115C	12785.1	-0.841338	0.111526	-7.54388	4.56199e-14	5.05387e-13
YCR016W	923.734	-1.02868	0.136357	-7.54405	4.55579e-14	5.05387e-13
YNL130C	627.244	-1.04258	0.138398	-7.53319	4.95156e-14	5.47632e-13
YDL024C	300.084	0.917093	0.121755	7.53226	4.98697e-14	5.50634e-13
YOL139C	6006.53	-0.823822	0.1094	-7.53039	5.05898e-14	5.57121e-13
YPL212C	354.191	-1.03368	0.13727	-7.5303	5.06245e-14	5.57121e-13
YDR277C	4728.51	1.03904	0.137992	7.52974	5.08425e-14	5.58597e-13
YOR178C	1991.36	0.740459	0.0983432	7.52934	5.09984e-14	5.59386e-13
YGR095C	593.853	-0.896897	0.119188	-7.52508	5.26861e-14	5.76948e-13
YLR345W	2713.51	0.751473	0.0998668	7.52475	5.28206e-14	5.7747e-13
YGL135W	21550.5	-0.680672	0.0904971	-7.52148	5.41578e-14	5.91119e-13
YDL079C	4302.83	0.80791	0.107417	7.52126	5.4251e-14	5.91167e-13
YNL332W	110.587	1.30919	0.174121	7.51882	5.52722e-14	6.0131e-13
YOR375C	5002.18	-0.879219	0.11695	-7.51791	5.56576e-14	6.04516e-13
YLL009C	574.659	0.908787	0.120945	7.51405	5.73245e-14	6.21607e-13
YIL131C	280.505	-1.12856	0.150241	-7.51171	5.83616e-14	6.31823e-13
YBL064C	3619.18	0.879959	0.117221	7.50681	6.05873e-14	6.54854e-13
YGR289C	949.999	0.917297	0.122204	7.50628	6.08329e-14	6.56443e-13
YKR094C	17440.1	-0.726043	0.0967765	-7.50226	6.27273e-14	6.7579e-13
YLL023C	1000.76	0.959659	0.127951	7.5002	6.37214e-14	6.85391e-13
YNL090W	307.505	-1.09109	0.145589	-7.49433	6.66374e-14	7.15599e-13
YLR297W	561.949	0.952849	0.127259	7.48746	7.02166e-14	7.52821e-13
YLR214W	303.253	1.03187	0.137924	7.48145	7.35077e-14	7.86839e-13
YMR114C	1474.13	0.711184	0.0950981	7.47842	7.52186e-14	8.02573e-13
YOR023C	1232.61	0.866881	0.115915	7.47859	7.51235e-14	8.02573e-13
YNL207W	874.497	-0.764082	0.102189	-7.47714	7.59587e-14	8.09173e-13
YFL057C	387.115	2.45524	0.328482	7.47451	7.74934e-14	8.24203e-13
YDR034C	2773.32	-0.893698	0.119589	-7.47309	7.83311e-14	8.31784e-13
YPL222C-A	183.621	1.07154	0.143449	7.46983	8.02975e-14	8.51307e-13
YOR101W	565.742	-0.89327	0.119622	-7.46744	8.17671e-14	8.65509e-13
YPR167C	598.454	-0.829264	0.111219	-7.45616	8.90807e-14	9.41428e-13
YKL050C	200.244	1.08626	0.145711	7.45492	8.99223e-14	9.48816e-13
YDR354C-A	173.101	-1.09642	0.147077	-7.45468	9.00831e-14	9.49009e-13
YDR165W	846.083	-0.876274	0.11758	-7.4526	9.15178e-14	9.626e-13
YPR046W	153.551	-1.16698	0.156625	-7.45083	9.27576e-14	9.74101e-13
YDR413C	1123.38	-0.869732	0.116782	-7.4475	9.51221e-14	9.97359e-13
YER066C-A	9473.99	0.785735	0.105556	7.44378	9.78434e-14	1.02428e-12
YDR436W	1338.68	0.800747	0.107584	7.44301	9.84168e-14	1.02866e-12
YDR453C	1623.47	0.817086	0.109835	7.43921	1.01288e-13	1.05702e-12
YPL144W	365.417	-1.14955	0.154551	-7.43801	1.02214e-13	1.065e-12
YLR219W	1445.28	0.773714	0.104028	7.43752	1.02589e-13	1.06725e-12
YKR009C	1100.18	0.814142	0.109486	7.43601	1.03775e-13	1.0779e-12
YGR123C	345.726	-1.1392	0.153317	-7.43037	1.08295e-13	1.1231e-12
YJL217W	3776.76	0.733223	0.0987151	7.42767	1.10528e-13	1.14447e-12
YDR381W	3675.4	-0.568491	0.0765986	-7.4217	1.1563e-13	1.19544e-12
YNL012W	558.155	0.810205	0.109216	7.41836	1.18576e-13	1.224e-12
YGR197C	618.637	1.06738	0.144039	7.41039	1.25932e-13	1.29591e-12
YOL041C	689.208	-1.0229	0.138034	-7.4105	1.25827e-13	1.29591e-12
YLR405W	258.892	-0.982674	0.133005	-7.38824	1.4879e-13	1.52877e-12
YLR441C	30263.6	-0.599096	0.0811599	-7.38167	1.56316e-13	1.60362e-12
YPR016C	1481.51	-0.712326	0.0965081	-7.381	1.571e-13	1.60919e-12
YBL066C	756.278	0.918812	0.124494	7.38036	1.57857e-13	1.61446e-12
YIL053W	3489.85	-1.21206	0.164241	-7.37978	1.58546e-13	1.61901e-12
YJL102W	806.861	0.843351	0.114322	7.37699	1.61914e-13	1.65087e-12
YJL177W	7746.7	-0.649287	0.0881845	-7.36282	1.80059e-13	1.83308e-12
YAL059W	755.887	-1.01366	0.137696	-7.36156	1.8178e-13	1.84777e-12
YDR412W	1169.98	-0.860458	0.116902	-7.3605	1.8322e-13	1.85957e-12
YNR061C	414.256	-0.887756	0.120712	-7.35434	1.91879e-13	1.94449e-12
YLL005C	288.112	1.10365	0.150157	7.34999	1.98223e-13	2.00573e-12
YBL009W	294.927	-0.975179	0.132691	-7.34923	1.99349e-13	2.01406e-12
YJL116C	353.54	1.39639	0.190129	7.34444	2.06627e-13	2.08443e-12
YIR003W	1703.23	0.744138	0.101334	7.34343	2.08193e-13	2.09705e-12
YPR009W	252.251	-1.0921	0.14873	-7.34283	2.09121e-13	2.10321e-12
YML022W	1608.27	-0.636341	0.0866661	-7.34244	2.09728e-13	2.10614e-12
YMR130W	322.964	-1.05802	0.144104	-7.34208	2.10297e-13	2.10867e-12
YFL050C	415.59	0.939833	0.128086	7.33754	2.17559e-13	2.17745e-12
YGR074W	478.791	-0.840117	0.114498	-7.33738	2.1781e-13	2.17745e-12
YOR329C	1212.36	0.745812	0.101667	7.33585	2.20323e-13	2.19926e-12
YCL026C-B	273.947	1.19801	0.163349	7.33402	2.23354e-13	2.22618e-12
YJL187C	309.286	-0.912949	0.124514	-7.33209	2.26584e-13	2.255e-12
YBR039W	5804.01	0.759095	0.103559	7.33004	2.30077e-13	2.28635e-12
YMR271C	1153.44	0.992451	0.135427	7.3283	2.33084e-13	2.31277e-12
YHR128W	983.639	-0.835469	0.114017	-7.32761	2.34286e-13	2.31834e-12
YLR022C	649.426	-0.975351	0.133107	-7.32758	2.34341e-13	2.31834e-12
YML063W	32335.8	-0.661131	0.0902302	-7.32716	2.35086e-13	2.32226e-12
YLR130C	854.128	-0.675774	0.092382	-7.31499	2.57395e-13	2.53887e-12
YNR054C	319.989	-1.09325	0.149479	-7.31372	2.59845e-13	2.55925e-12
YCR020W-B	266.22	-1.25255	0.171271	-7.31325	2.60755e-13	2.56441e-12
YPL220W	20670.6	-0.699139	0.0958738	-7.29229	3.0474e-13	2.99256e-12
YFL058W	115.165	1.23546	0.169504	7.28865	3.13065e-13	3.06979e-12
YOR230W	4255.38	0.752057	0.103202	7.28725	3.1634e-13	3.09734e-12
YER003C	1227.69	-1.03741	0.14247	-7.28163	3.29823e-13	3.22461e-12
YJL010C	398.775	-0.996931	0.136931	-7.28056	3.32438e-13	3.24541e-12
YLR294C	2588.65	0.741519	0.101876	7.27864	3.37202e-13	3.28711e-12
YLR008C	480.017	-0.808411	0.111072	-7.27827	3.38134e-13	3.29137e-12
YKL039W	1796.96	0.724377	0.0995419	7.27711	3.41054e-13	3.31494e-12
YDR074W	7095.66	0.630105	0.086616	7.2747	3.47201e-13	3.36977e-12
YNR065C	600.292	0.766419	0.105407	7.27102	3.56783e-13	3.45773e-12
YPL280W	170.264	1.5473	0.212824	7.2703	3.58694e-13	3.4712e-12
YJR043C	333.129	-1.13964	0.156836	-7.26643	3.69105e-13	3.56466e-12
YMR118C	362.733	0.918131	0.126354	7.26632	3.69423e-13	3.56466e-12
YJL034W	3633.77	0.926523	0.12753	7.26516	3.72592e-13	3.59004e-12
YGR034W	16285.6	-0.873973	0.12042	-7.25771	3.93711e-13	3.78805e-12
YJL042W	1368.3	0.826185	0.113902	7.25349	4.06172e-13	3.9023e-12
YBL042C	992.344	-0.919018	0.126712	-7.25282	4.08188e-13	3.91602e-12
YKL099C	558.264	-0.957863	0.132141	-7.24878	4.20542e-13	4.02873e-12
YLR083C	751.407	-0.906838	0.125127	-7.24737	4.24948e-13	4.06509e-12
YFR014C	2227.78	0.614112	0.084744	7.24667	4.27143e-13	4.08022e-12
YBR252W	505.57	-1.15306	0.159145	-7.24536	4.31296e-13	4.10224e-12
YIL010W	1046.97	0.680872	0.0939714	7.24553	4.30754e-13	4.10224e-12
YLR287C	728.415	-0.83209	0.114843	-7.24549	4.30884e-13	4.10224e-12
YOL080C	104.197	-1.44543	0.199682	-7.23865	4.53184e-13	4.30428e-12
YOL156W	298.88	1.26134	0.17432	7.23577	4.62887e-13	4.39018e-12
YCR034W	593.364	-0.983374	0.136045	-7.22831	4.89048e-13	4.62699e-12
YDL091C	1099.18	0.669987	0.09269	7.22825	4.89246e-13	4.62699e-12
YOR272W	804.869	-0.8212	0.113758	-7.21886	5.24248e-13	4.95098e-12
YDR450W	19290.9	-0.861034	0.119292	-7.21784	5.28185e-13	4.98109e-12
YPR078C	207.763	1.09928	0.152394	7.21342	5.45655e-13	5.13857e-12
YFL053W	154.595	1.16678	0.161758	7.21312	5.46841e-13	5.14247e-12
YGL101W	1044.49	-0.864572	0.119947	-7.20792	5.6811e-13	5.33494e-12
YNL289W	38.7183	-2.16619	0.300537	-7.20771	5.69008e-13	5.33585e-12
YDL174C	5613.15	1.07107	0.148614	7.20708	5.71648e-13	5.35307e-12
YDR161W	1573.3	-0.689876	0.0957587	-7.20432	5.83355e-13	5.44889e-12
YFL021C-A	469.019	-0.822085	0.114114	-7.20409	5.84336e-13	5.44889e-12
YOR263C	207.248	-1.10593	0.153511	-7.20428	5.83521e-13	5.44889e-12
YOL048C	2431.24	0.925107	0.128425	7.20348	5.86942e-13	5.46554e-12
YOL056W	235.753	-1.07934	0.150035	-7.19391	6.29607e-13	5.85464e-12
YJL219W	250.206	1.34358	0.186897	7.18887	6.53298e-13	6.06647e-12
YNL113W	281.299	-0.997452	0.138846	-7.18385	6.7776e-13	6.28486e-12
YNL112W	921.538	-1.32151	0.184012	-7.18168	6.88607e-13	6.37656e-12
YLL001W	1206.8	0.823557	0.114735	7.17788	7.08019e-13	6.54721e-12
YGR078C	540.009	-0.854587	0.119299	-7.16338	7.8712e-13	7.26858e-12
YDR025W	13406	-0.677977	0.0947454	-7.15578	8.31986e-13	7.67225e-12
YHR049W	2274.71	-0.572192	0.0800081	-7.15167	8.57267e-13	7.89444e-12
YGR177C	138.032	-1.16532	0.162949	-7.1514	8.58958e-13	7.89909e-12
YAL008W	902.206	0.757832	0.105982	7.1506	8.63991e-13	7.93442e-12
YIL015W	348.598	-0.924853	0.129343	-7.15038	8.6535e-13	7.93595e-12
YFL018C	5339.8	0.778764	0.10898	7.14592	8.93982e-13	8.18725e-12
YDR121W	616.223	-0.921502	0.128966	-7.14533	8.97812e-13	8.21103e-12
YCL038C	471.891	0.842548	0.117968	7.14216	9.18762e-13	8.39111e-12
YCR027C	455.949	-0.863087	0.120956	-7.13557	9.63874e-13	8.79106e-12
YOL060C	1042.01	1.00761	0.141255	7.13329	9.79968e-13	8.92561e-12
YNL103W-A	350.828	1.13836	0.159593	7.13292	9.82616e-13	8.93751e-12
YFL034C-B	390.41	-0.871142	0.122199	-7.12889	1.01182e-12	9.19055e-12
YNL111C	608.465	-1.2423	0.174498	-7.11929	1.08481e-12	9.84016e-12
YOR041C	703.664	0.799885	0.112441	7.11384	1.12855e-12	1.0223e-11
YGR049W	557.541	-0.743791	0.104635	-7.10845	1.17355e-12	1.06161e-11
YML106W	2260.23	-0.59476	0.083747	-7.10186	1.23089e-12	1.11198e-11
YLR110C	80295.8	-0.799542	0.112625	-7.09913	1.25547e-12	1.13264e-11
YHR080C	1376.15	0.814107	0.114687	7.09851	1.26111e-12	1.1362e-11
YLR243W	642.181	-0.856572	0.120717	-7.0957	1.28697e-12	1.15793e-11
YJL159W	22667.8	0.698034	0.0983807	7.09523	1.29136e-12	1.1603e-11
YPL112C	812.777	-0.754071	0.106284	-7.09488	1.29463e-12	1.16168e-11
YOR051C	1534.54	-0.798068	0.112603	-7.08746	1.36592e-12	1.22399e-11
YPL185W	292.658	1.09096	0.154136	7.07791	1.46348e-12	1.30966e-11
YDL027C	1123.01	0.697025	0.0985018	7.07627	1.48083e-12	1.32341e-11
YDR013W	239.583	-1.1102	0.157004	-7.07119	1.53616e-12	1.37101e-11
YGL253W	8235.79	-0.969907	0.137191	-7.06976	1.55197e-12	1.38327e-11
YGR020C	3099.61	-0.897708	0.127003	-7.0684	1.56732e-12	1.39508e-11
YLR450W	1057.9	0.659262	0.0932773	7.06776	1.57451e-12	1.39961e-11
YCL002C	308.639	-0.838031	0.118626	-7.06449	1.61201e-12	1.42913e-11
YGR037C	2069.79	0.730769	0.103442	7.06453	1.6116e-12	1.42913e-11
YDR087C	1425.19	-0.95483	0.1352	-7.06236	1.63696e-12	1.44932e-11
YOL045W	918.162	0.71206	0.100829	7.06208	1.64029e-12	1.45034e-11
YER079W	1680.88	0.77425	0.109643	7.06156	1.64644e-12	1.45385e-11
YMR196W	3171.99	0.674113	0.0954666	7.06125	1.65016e-12	1.4552e-11
YOR042W	2966.16	0.665576	0.0942667	7.06056	1.65829e-12	1.46044e-11
YNL222W	198.534	-1.13948	0.161419	-7.05917	1.67497e-12	1.47318e-11
YNR002C	855.849	0.898166	0.127264	7.05748	1.69547e-12	1.48924e-11
YJR007W	2560.56	-0.62718	0.0889282	-7.05265	1.75544e-12	1.53988e-11
YJL168C	326.5	-0.913351	0.1296	-7.04749	1.82175e-12	1.59595e-11
YLR051C	698.894	-0.742639	0.105574	-7.0343	2.00264e-12	1.75211e-11
YDR028C	2378.57	0.844123	0.120101	7.02843	2.08873e-12	1.82504e-11
YBR003W	816.467	0.673124	0.0957855	7.02741	2.104e-12	1.83597e-11
YLR324W	1279.77	0.654259	0.0931372	7.02468	2.14556e-12	1.86978e-11
YPR047W	685.701	0.870699	0.124015	7.02092	2.20419e-12	1.91837e-11
YIL017C	1127.7	0.62603	0.0892326	7.01572	2.28771e-12	1.98846e-11
YOL097C	1562.92	-0.828774	0.118155	-7.01431	2.31083e-12	2.00593e-11
YMR316C-A	471.409	-0.859829	0.122608	-7.01282	2.33557e-12	2.02477e-11
YGR138C	897.755	-0.836326	0.119308	-7.00982	2.38627e-12	2.06604e-11
YML080W	129.827	-1.25674	0.179312	-7.00868	2.4058e-12	2.07934e-11
YML008C	3234.09	-0.667499	0.0952406	-7.00856	2.40789e-12	2.07934e-11
YBL069W	891.678	-0.681313	0.0973024	-7.00202	2.52297e-12	2.17309e-11
YPR143W	829.405	-0.729019	0.104114	-7.00215	2.52066e-12	2.17309e-11
YBL039C-A	82.0502	-1.42169	0.203114	-6.99946	2.56946e-12	2.20742e-11
YGR023W	1922	0.856233	0.122327	6.99956	2.56763e-12	2.20742e-11
YBR024W	548.298	0.729555	0.104253	6.99795	2.59734e-12	2.22849e-11
YGR052W	1136.04	1.22176	0.17482	6.98868	2.77487e-12	2.37774e-11
YOL040C	37321.3	-0.817574	0.117047	-6.98502	2.84823e-12	2.43747e-11
YNL239W	2827.83	0.665744	0.0953612	6.98128	2.925e-12	2.49995e-11
YAL059C-A	377.815	-1.00772	0.144353	-6.98089	2.93311e-12	2.50367e-11
YDR383C	385.984	-0.845444	0.121409	-6.96359	3.31717e-12	2.82787e-11
YBR171W	946.552	-0.848302	0.121873	-6.96053	3.38987e-12	2.88615e-11
YLL051C	711.837	0.759636	0.109197	6.95655	3.48706e-12	2.96511e-11
YNL208W	6731.72	0.598634	0.0860806	6.95434	3.54212e-12	3.00809e-11
YGR143W	1049.62	0.652651	0.0939128	6.94954	3.66484e-12	3.10834e-11
YOL064C	1107.66	-0.758035	0.1092	-6.94172	3.87361e-12	3.28123e-11
YLR099C	599.824	1.05586	0.152121	6.9409	3.89596e-12	3.29597e-11
YER067W	38929.8	0.770398	0.111094	6.93466	4.07198e-12	3.44051e-11
YJL112W	1010.08	0.794637	0.114697	6.92813	4.26441e-12	3.59854e-11
YPR127W	1207.58	0.690263	0.0996829	6.92459	4.37242e-12	3.68501e-11
YGR110W	1179.11	0.979448	0.141488	6.9225	4.43754e-12	3.73516e-11
YOR271C	485.215	-0.866887	0.12528	-6.91959	4.5294e-12	3.80767e-11
YGR243W	3803.4	1.00154	0.144788	6.91727	4.60423e-12	3.86569e-11
YER126C	651.035	-0.742975	0.107455	-6.91431	4.70154e-12	3.94242e-11
YGL073W	2134.87	0.761829	0.110236	6.91088	4.81645e-12	4.0337e-11
YBL084C	614.117	0.785822	0.113813	6.90448	5.03869e-12	4.20923e-11
YLL018C	9891.61	0.896206	0.129798	6.90464	5.03291e-12	4.20923e-11
YER131W	22516.9	-1.10218	0.159699	-6.90164	5.14069e-12	4.28369e-11
YOR095C	1231.41	-0.835946	0.12112	-6.90179	5.1351e-12	4.28369e-11
YER074W	13953.4	-0.614704	0.0891543	-6.89484	5.39269e-12	4.48807e-11
YDR352W	466.301	-0.924968	0.134233	-6.89075	5.54989e-12	4.61313e-11
YPR081C	813.738	0.69096	0.100278	6.89045	5.5617e-12	4.61718e-11
YDL126C	9946.64	0.854783	0.124064	6.88987	5.58448e-12	4.63032e-11
YOR309C	458.934	-0.885002	0.128501	-6.88713	5.69297e-12	4.7144e-11
YGR073C	352.598	-0.869149	0.126213	-6.88635	5.7242e-12	4.73438e-11
YHR106W	945.169	0.719779	0.104576	6.88286	5.86633e-12	4.84591e-11
YNL104C	11262.3	0.967048	0.140511	6.88236	5.88671e-12	4.85672e-11
YFL051C	106.252	1.37686	0.200244	6.87591	6.15952e-12	5.07135e-11
YJL072C	505.84	-1.00925	0.146781	-6.87585	6.1621e-12	5.07135e-11
YEL022W	381.381	-0.835856	0.12159	-6.87439	6.22566e-12	5.11734e-11
YIL129C	792.503	0.808987	0.117737	6.87116	6.36817e-12	5.22802e-11
YMR212C	504.121	-0.839386	0.122243	-6.86652	6.57884e-12	5.39433e-11
YBR242W	1131.11	-0.642729	0.0936131	-6.86581	6.61151e-12	5.41444e-11
YNL173C	3555.93	0.560599	0.0816838	6.86303	6.74149e-12	5.51411e-11
YPR169W	1211.67	-0.679938	0.0990799	-6.86252	6.7654e-12	5.52687e-11
YPR049C	472.154	0.885478	0.12927	6.84982	7.39445e-12	6.03336e-11
YMR135C	2387.92	0.66197	0.0966744	6.84742	7.51917e-12	6.12761e-11
YIL137C	1293.9	0.729987	0.106622	6.84649	7.5683e-12	6.16011e-11
YLR355C	1601.58	-0.811454	0.118525	-6.84626	7.58081e-12	6.16276e-11
YER148W-A	103.647	-1.22494	0.179061	-6.8409	7.86978e-12	6.38735e-11
YNL301C	6417.81	-0.659803	0.0964515	-6.84078	7.87626e-12	6.38735e-11
YDR293C	4735.88	0.682771	0.0999723	6.8296	8.51538e-12	6.89725e-11
YMR014W	292.423	-0.915242	0.134022	-6.82905	8.5476e-12	6.91494e-11
YKL093W	896.935	0.682515	0.0999955	6.82545	8.76472e-12	7.08198e-11
YER067C-A	30323.8	0.767978	0.112522	6.82513	8.78432e-12	7.08921e-11
YAL063C	423.731	0.795539	0.116693	6.81739	9.27081e-12	7.47277e-11
YPR195C	70.6207	-1.61293	0.236718	-6.81372	9.51095e-12	7.65706e-11
YOR254C	1062.4	-0.756788	0.111072	-6.81347	9.52692e-12	7.66066e-11
YFR031C-A	21136	-0.527341	0.0775651	-6.79869	1.05578e-11	8.47934e-11
YOR276W	3036.82	-1.13652	0.167228	-6.79621	1.07406e-11	8.61579e-11
YLL002W	192.34	-1.13662	0.167499	-6.78585	1.15403e-11	9.2461e-11
YDL168W	1253.13	0.852278	0.125708	6.77983	1.20314e-11	9.62797e-11
YJR024C	715.838	-0.76146	0.112374	-6.77613	1.23436e-11	9.86598e-11
YDR466W	820.391	0.677082	0.100037	6.76834	1.30266e-11	1.03994e-10
YCL001W	807.208	-0.956239	0.14132	-6.7665	1.31937e-11	1.05202e-10
YLR230W	1400.15	-0.845168	0.125027	-6.75987	1.38118e-11	1.09999e-10
YJR077C	3759.76	1.02445	0.151601	6.75755	1.40346e-11	1.11639e-10
YOL092W	1097.88	-0.643798	0.0953543	-6.75164	1.46188e-11	1.16148e-10
YLR216C	4287.08	0.913871	0.13536	6.75139	1.46431e-11	1.16203e-10
YDR099W	8325.38	0.677226	0.10033	6.74996	1.47889e-11	1.1722e-10
YLR286W-A	308.684	-1.10445	0.163804	-6.74253	1.55651e-11	1.23225e-10
YKL193C	1554.79	0.645192	0.0957111	6.74104	1.57262e-11	1.24353e-10
YNL293W	1295.57	0.601136	0.0892151	6.73805	1.60521e-11	1.26779e-10
YLL011W	312.123	-1.05567	0.156749	-6.73478	1.64178e-11	1.29514e-10
YGL227W	1664.15	0.585588	0.0869555	6.73434	1.64675e-11	1.29752e-10
YGL032C	484.91	-0.788587	0.11717	-6.73029	1.6932e-11	1.33254e-10
YER002W	2023.41	-0.656443	0.0975716	-6.72781	1.7224e-11	1.35393e-10
YNL024C	96.9237	-1.43452	0.213299	-6.72538	1.75141e-11	1.3751e-10
YBL030C	8065.65	0.969378	0.144235	6.72082	1.80702e-11	1.4171e-10
YBR078W	7454.94	-0.688043	0.102468	-6.71473	1.88417e-11	1.47586e-10
YEL041W	490.548	0.838502	0.124885	6.71422	1.89079e-11	1.47931e-10
YER056C-A	13465.1	-0.639156	0.0952236	-6.71216	1.91767e-11	1.49857e-10
YJL016W	1053.45	0.625381	0.0931984	6.71021	1.94345e-11	1.51694e-10
YFL036W	971.026	0.827331	0.123383	6.70536	2.00907e-11	1.56632e-10
YOL036W	1242.55	0.928884	0.138633	6.70028	2.08017e-11	1.61986e-10
YDL132W	1462.56	0.75332	0.112483	6.69717	2.12489e-11	1.65275e-10
YNL040W	1366.37	0.649618	0.0970335	6.69478	2.15998e-11	1.67808e-10
YMR239C	263.883	-0.931174	0.139143	-6.69223	2.19802e-11	1.70564e-10
YLR394W	305.538	1.00788	0.150626	6.69125	2.21279e-11	1.71511e-10
YOR014W	2616.52	0.623064	0.0931887	6.68605	2.29278e-11	1.77504e-10
YHR013C	828.122	-0.676995	0.10139	-6.67712	2.43689e-11	1.88441e-10
YLR388W	9439.73	-0.994577	0.148965	-6.6766	2.44551e-11	1.88889e-10
YDR335W	1499.51	0.743014	0.111292	6.67624	2.45146e-11	1.89129e-10
YAL025C	363.93	-0.931404	0.139585	-6.67267	2.51183e-11	1.93562e-10
YKL122C	1767.91	-0.881794	0.132188	-6.67073	2.54528e-11	1.95687e-10
YOR277C	2710.57	-1.14056	0.170975	-6.67089	2.54253e-11	1.95687e-10
YBR191W	24636.3	-0.83865	0.125779	-6.66764	2.59944e-11	1.99541e-10
YPL238C	1730.26	-0.658462	0.0987564	-6.66753	2.60141e-11	1.99541e-10
YCL039W	800.403	0.741811	0.111317	6.66393	2.66598e-11	2.04259e-10
YKL080W	3082.19	-0.553133	0.0830691	-6.65871	2.76244e-11	2.11406e-10
YDR204W	1054.1	0.636682	0.0956364	6.65732	2.78866e-11	2.13168e-10
YJR143C	917.87	-0.816494	0.122713	-6.65371	2.85796e-11	2.18214e-10
YOR147W	1242.38	0.695141	0.104526	6.65042	2.92264e-11	2.22897e-10
YOR293W	21238.9	-0.90737	0.136559	-6.64454	3.04163e-11	2.31706e-10
YLR043C	3062.92	-0.933781	0.140603	-6.64124	3.11056e-11	2.36687e-10
YLR068W	191.195	-1.03999	0.156707	-6.63651	3.21203e-11	2.44129e-10
YJR115W	871.107	0.658713	0.0994037	6.62664	3.43403e-11	2.60705e-10
YML064C	377.404	-0.833363	0.125796	-6.62473	3.47883e-11	2.63805e-10
YDR045C	530.868	-0.778149	0.117487	-6.62328	3.51311e-11	2.66101e-10
YER053C	3848.13	0.905658	0.136767	6.62192	3.54554e-11	2.67948e-10
YOR306C	302.702	0.821677	0.124083	6.62197	3.54434e-11	2.67948e-10
YJR123W	51485.6	-0.596491	0.0901028	-6.62011	3.5892e-11	2.7094e-10
YJR130C	2253.19	0.717633	0.108483	6.61515	3.71174e-11	2.79873e-10
YHR196W	322.479	-0.966775	0.146193	-6.61301	3.76577e-11	2.83626e-10
YIR031C	374.347	-0.84621	0.128079	-6.60694	3.92347e-11	2.95169e-10
YDR129C	8337.23	0.573927	0.0868735	6.60647	3.93604e-11	2.95447e-10
YDR222W	1458.37	-0.869492	0.131611	-6.60654	3.93412e-11	2.95447e-10
YNL294C	2235.74	0.58053	0.0879511	6.6006	4.09505e-11	3.07036e-10
YDR144C	174.493	-0.997903	0.151238	-6.59822	4.16127e-11	3.11651e-10
YBR179C	789.844	0.804928	0.121999	6.59781	4.17265e-11	3.12152e-10
YEL049W	64.9838	1.40806	0.213506	6.59493	4.25447e-11	3.17916e-10
YDL111C	645.918	-0.69997	0.106148	-6.59426	4.27381e-11	3.19002e-10
YML034W	1519.24	0.702569	0.106575	6.59226	4.33187e-11	3.22974e-10
YPL237W	3484.12	-0.596517	0.0904903	-6.59205	4.33795e-11	3.23066e-10
YOR020C	5303.5	0.803891	0.121976	6.59059	4.38082e-11	3.25894e-10
YGL147C	25103.5	-0.728273	0.110507	-6.59031	4.38904e-11	3.26141e-10
YGL097W	652.651	-0.802232	0.121833	-6.58468	4.55864e-11	3.38366e-10
YEL012W	2027.21	0.824314	0.125299	6.57878	4.74325e-11	3.51677e-10
YHR183W	5498.5	0.888031	0.134995	6.57827	4.75953e-11	3.52491e-10
YMR311C	4323.49	0.594854	0.09045	6.57661	4.81298e-11	3.56054e-10
YMR125W	781.523	-0.677586	0.103066	-6.57428	4.88897e-11	3.61274e-10
YOR145C	1889.14	-0.564934	0.0859576	-6.57224	4.95629e-11	3.65842e-10
YNR033W	1035.48	0.799284	0.121647	6.57051	5.01419e-11	3.69706e-10
YDL083C	13246.7	-0.604843	0.0920881	-6.56809	5.09637e-11	3.7535e-10
YPL270W	1192.82	0.759935	0.115792	6.56293	5.27594e-11	3.88146e-10
YIL096C	316.112	-0.933694	0.14229	-6.56189	5.31291e-11	3.90434e-10
YCL057C-A	1095.26	0.723368	0.110245	6.56147	5.32812e-11	3.9112e-10
YGR201C	919.025	0.667326	0.101744	6.55886	5.42193e-11	3.97569e-10
YBR291C	2003.41	-1.25994	0.192135	-6.55755	5.46976e-11	4.00634e-10
YOR243C	594.165	-0.934976	0.142626	-6.55545	5.54728e-11	4.05866e-10
YPL224C	1085.65	0.660606	0.100812	6.55287	5.64404e-11	4.12492e-10
YBR052C	3589.89	0.697293	0.106419	6.55231	5.66553e-11	4.13609e-10
YAR009C	1097.87	0.882809	0.134846	6.54681	5.87806e-11	4.28654e-10
YPL118W	1964.87	0.620005	0.0947064	6.5466	5.88605e-11	4.28767e-10
YOR287C	133.824	-1.10531	0.168845	-6.54631	5.89756e-11	4.29136e-10
YDR098C	1589.33	-0.688743	0.105243	-6.54432	5.97667e-11	4.33944e-10
YML018C	91.1718	-1.22762	0.187585	-6.54436	5.97518e-11	4.33944e-10
YOR007C	6581.96	0.92212	0.140915	6.54379	5.99801e-11	4.35019e-10
YLR009W	1901.87	-0.726405	0.11105	-6.54122	6.10175e-11	4.42062e-10
YGL259W	188.831	0.972414	0.148685	6.54008	6.14856e-11	4.44968e-10
YBR151W	3150.21	0.549839	0.0841003	6.53789	6.23926e-11	4.51042e-10
YLR070C	474.872	0.815324	0.124822	6.53189	6.49441e-11	4.68978e-10
YIL052C	12792.3	-0.588991	0.0901942	-6.53025	6.56608e-11	4.7364e-10
YOL061W	862.32	-0.63818	0.0977797	-6.52671	6.72321e-11	4.84449e-10
YHR182C-A	1581.04	0.928265	0.142261	6.52506	6.79742e-11	4.89267e-10
YOL107W	176.33	-1.18601	0.181944	-6.51855	7.09889e-11	5.10415e-10
YNL256W	352.217	-0.797339	0.122366	-6.51601	7.22025e-11	5.18581e-10
YGR255C	807.145	0.683889	0.104962	6.51559	7.24043e-11	5.1947e-10
YMR011W	43101.2	0.672893	0.103328	6.5122	7.40595e-11	5.30773e-10
YMR316W	2413.32	-0.871976	0.133937	-6.51036	7.49725e-11	5.36739e-10
YMR274C	154.499	-1.01103	0.155467	-6.50321	7.86249e-11	5.62282e-10
YOR221C	1262.61	0.685188	0.105425	6.49927	8.07107e-11	5.76579e-10
YJL171C	2909.34	-0.730902	0.112659	-6.48774	8.7134e-11	6.21798e-10
YIL087C	1075.93	0.788899	0.12163	6.48607	8.81059e-11	6.27389e-10
YKL205W	548.509	-0.709299	0.109355	-6.4862	8.80254e-11	6.27389e-10
YAL054C	966.513	0.800733	0.123558	6.48065	9.13304e-11	6.49656e-10
YNL151C	623.356	-0.730551	0.112741	-6.47991	9.17764e-11	6.52132e-10
YML030W	1675.72	0.698547	0.107846	6.47727	9.33989e-11	6.62953e-10
YFL041W	663.378	0.897863	0.138905	6.46387	1.02058e-10	7.23645e-10
YOR021C	1576.79	-0.604167	0.0934835	-6.46281	1.02773e-10	7.27941e-10
YDR486C	1595.52	0.557467	0.0862992	6.4597	1.04913e-10	7.42077e-10
YMR003W	247.143	-0.937251	0.145095	-6.45958	1.04992e-10	7.42077e-10
YBR207W	1389.9	0.809906	0.125393	6.45894	1.05439e-10	7.44444e-10
YLR406C	8055.63	-0.719709	0.111444	-6.45802	1.0608e-10	7.48179e-10
YFR040W	2457	0.738401	0.114344	6.45771	1.06298e-10	7.4892e-10
YNL303W	287.071	-1.02493	0.158752	-6.45614	1.07406e-10	7.55931e-10
YGR090W	425.836	-0.891498	0.138195	-6.451	1.11116e-10	7.81214e-10
YBL087C	9135.31	-0.87538	0.135737	-6.44909	1.12526e-10	7.90293e-10
YCR068W	520.837	0.828892	0.128542	6.44839	1.13041e-10	7.93075e-10
YOR247W	4597.69	-0.697883	0.108281	-6.4451	1.15526e-10	8.09654e-10
YDR113C	387.358	-0.953512	0.147995	-6.44287	1.17235e-10	8.20765e-10
YHR082C	1327.01	0.765852	0.118918	6.44014	1.19362e-10	8.34784e-10
YIL009C-A	518.915	-0.749409	0.116403	-6.43804	1.21024e-10	8.45517e-10
YAR035C-A	37.538	1.92674	0.299294	6.43761	1.21371e-10	8.47054e-10
YLR221C	1442.18	-0.945479	0.146901	-6.43615	1.2254e-10	8.54313e-10
YOR132W	1935.24	0.529215	0.0823449	6.42681	1.30312e-10	9.0755e-10
YER064C	648.011	-0.896194	0.139474	-6.42554	1.31401e-10	9.14178e-10
YPL054W	345.714	0.810311	0.126147	6.42356	1.3312e-10	9.25167e-10
YDR021W	263.795	-0.877352	0.136686	-6.41875	1.37396e-10	9.53892e-10
YBR186W	129.629	-1.03383	0.161129	-6.41618	1.39739e-10	9.69149e-10
YER145C	568.105	-0.675393	0.10532	-6.41275	1.42917e-10	9.90157e-10
YLR435W	212.588	-1.06221	0.165661	-6.41198	1.43638e-10	9.9412e-10
YHR001W-A	2449.6	0.794009	0.12386	6.41056	1.44989e-10	1.00243e-09
YLL044W	13823.7	-0.483307	0.0754387	-6.40661	1.48789e-10	1.02763e-09
YMR292W	350.83	-0.842766	0.131587	-6.40461	1.50753e-10	1.04012e-09
YDR496C	881.993	-0.933833	0.145815	-6.40425	1.51113e-10	1.04152e-09
YML011C	309.332	-0.836876	0.130726	-6.40175	1.5361e-10	1.05763e-09
YOR073W	124.25	-1.09879	0.171691	-6.39979	1.55591e-10	1.07017e-09
YPL260W	2760.13	0.671572	0.105001	6.39589	1.59619e-10	1.09674e-09
YNR050C	12021.6	-1.27883	0.200003	-6.39404	1.61559e-10	1.10893e-09
YKL091C	2019.73	0.615555	0.0962758	6.39367	1.61955e-10	1.1105e-09
YKL146W	1740.38	0.821824	0.128578	6.39164	1.64118e-10	1.12418e-09
YER044C	2509.34	-0.733652	0.114846	-6.38812	1.67943e-10	1.14919e-09
YDR020C	204.534	-1.01276	0.158687	-6.38209	1.74684e-10	1.1941e-09
YKL010C	1485.35	0.625489	0.0980335	6.38036	1.76667e-10	1.20641e-09
YOL104C	73.7048	1.33121	0.209021	6.3688	1.90515e-10	1.29964e-09
YLL061W	291.301	0.930493	0.146275	6.36127	2.00092e-10	1.36358e-09
YOR146W	719.132	-0.719634	0.113134	-6.36088	2.006e-10	1.36564e-09
YBR061C	438.589	-0.742871	0.11679	-6.36072	2.00806e-10	1.36564e-09
YNL147W	813.78	-0.69939	0.109985	-6.35895	2.03138e-10	1.3801e-09
YFR018C	735.808	0.650131	0.102269	6.35705	2.05662e-10	1.39582e-09
YJR150C	398.003	1.12483	0.177004	6.35481	2.08685e-10	1.41489e-09
YBL022C	1451.78	0.968634	0.152518	6.35095	2.13982e-10	1.44933e-09
YBR254C	527.452	-0.928138	0.14618	-6.34929	2.16318e-10	1.46366e-09
YNL143C	82.4142	-1.31647	0.207398	-6.34756	2.18755e-10	1.47865e-09
YHR204W	350.802	-0.773122	0.12192	-6.34123	2.27934e-10	1.53913e-09
YJL179W	815.747	-0.999151	0.157586	-6.34034	2.29259e-10	1.54651e-09
YFL034C-A	1089.94	-0.732604	0.115572	-6.33895	2.31342e-10	1.55898e-09
YLL039C	10228.4	0.76454	0.120614	6.33873	2.31662e-10	1.55956e-09
YPL078C	5394.6	0.545346	0.0860946	6.33427	2.38468e-10	1.60376e-09
YAL016W	3131.93	0.619385	0.0978097	6.33255	2.41145e-10	1.62013e-09
YDL112W	417.444	-0.812323	0.128409	-6.32608	2.51468e-10	1.68778e-09
YNL069C	19234.5	-0.601141	0.0950287	-6.32589	2.51779e-10	1.68816e-09
YNR045W	960.726	0.632997	0.100085	6.32462	2.53861e-10	1.70041e-09
YOR303W	5456.27	0.772191	0.122118	6.3233	2.56038e-10	1.71326e-09
YJR027W	2502.24	0.614338	0.0973279	6.31204	2.75379e-10	1.84084e-09
YLR274W	569.858	-0.835104	0.132314	-6.31153	2.76291e-10	1.84508e-09
YIL055C	574.579	0.848476	0.134451	6.31068	2.7781e-10	1.85337e-09
YDL082W	10305.3	-0.570465	0.0904826	-6.3047	2.88756e-10	1.92446e-09
YLL020C	250.344	1.03302	0.163866	6.30403	2.90003e-10	1.93084e-09
YHR211W	292.099	0.866269	0.137423	6.30368	2.90669e-10	1.93334e-09
YNL071W	4530.21	0.696546	0.110563	6.29998	2.97688e-10	1.97805e-09
YCL057W	1493.91	0.854912	0.135711	6.2995	2.98613e-10	1.98222e-09
YBR298C	1254.57	0.789918	0.125407	6.29882	2.99925e-10	1.98894e-09
YLR307C-A	175.41	1.15503	0.183438	6.29658	3.04279e-10	2.01581e-09
YML036W	505.998	-0.800074	0.127139	-6.29289	3.1161e-10	2.06232e-09
YOL083C-A	126.175	1.02626	0.16313	6.29105	3.15335e-10	2.08491e-09
YPL110C	871.688	0.670321	0.106557	6.29071	3.16023e-10	2.08738e-09
YER070W	187.339	-1.41234	0.22455	-6.28964	3.18201e-10	2.0976e-09
YJL068C	1204.74	0.599749	0.0953551	6.28964	3.18198e-10	2.0976e-09
YGR067C	1581.32	0.789582	0.125595	6.28675	3.24171e-10	2.13485e-09
YIL064W	1096.28	-0.692249	0.110139	-6.28524	3.27355e-10	2.15368e-09
YCL048W	251.99	1.10688	0.17615	6.28373	3.30544e-10	2.17252e-09
YDR302W	333.3	-0.813987	0.129553	-6.28304	3.32011e-10	2.18001e-09
YOR340C	871.706	-0.786804	0.12524	-6.28237	3.33458e-10	2.18735e-09
YNL153C	557.392	-0.888459	0.141437	-6.28168	3.34937e-10	2.19489e-09
YBL092W	32075.5	-0.790067	0.125885	-6.27609	3.47197e-10	2.27299e-09
YHR127W	203.873	-1.11272	0.177477	-6.26968	3.61794e-10	2.36623e-09
YER087C-B	985.468	-0.817681	0.130453	-6.26802	3.65664e-10	2.38919e-09
YIR035C	1224.36	-0.744547	0.118802	-6.26714	3.67736e-10	2.40038e-09
YJL188C	23564.1	-0.958011	0.152926	-6.26456	3.7389e-10	2.43816e-09
YPL070W	1126.68	0.568852	0.0908118	6.26407	3.75055e-10	2.44336e-09
YAR019C	735.245	0.624077	0.0996719	6.26131	3.81747e-10	2.48287e-09
YCR083W	1301.57	0.875192	0.139779	6.26127	3.81866e-10	2.48287e-09
YDL010W	664.758	-0.92492	0.147877	-6.25464	3.98422e-10	2.58711e-09
YNL309W	116.901	-1.23933	0.198148	-6.25455	3.98674e-10	2.58711e-09
YHR153C	48.2044	-1.61319	0.258042	-6.25168	4.06052e-10	2.63242e-09
YBR069C	444.568	-0.862872	0.138039	-6.25094	4.07989e-10	2.63984e-09
YMR290C	874.537	-0.791482	0.126617	-6.25102	4.07788e-10	2.63984e-09
YFR044C	2763.08	0.685098	0.109635	6.24891	4.13325e-10	2.67176e-09
YDL136W	19194.4	-0.836868	0.13413	-6.23921	4.39777e-10	2.84e-09
YDL164C	245.514	-0.836968	0.134186	-6.23736	4.45019e-10	2.87106e-09
YGR230W	454.798	-0.946909	0.151834	-6.23647	4.47542e-10	2.88454e-09
YDR097C	366.764	-0.761616	0.122136	-6.2358	4.49489e-10	2.89429e-09
YDR365W-B	2446.68	0.58897	0.0945346	6.23021	4.65825e-10	2.99658e-09
YLR203C	1182.43	0.810742	0.130139	6.2298	4.6703e-10	3.00143e-09
YCL059C	1723.76	-0.689139	0.110771	-6.2213	4.93061e-10	3.16567e-09
YLR264W	1675.35	-1.00766	0.161982	-6.22082	4.9456e-10	3.17224e-09
YPR157W	91.7751	-1.19144	0.191545	-6.22015	4.96695e-10	3.18287e-09
YGL037C	11957.9	0.698172	0.112265	6.21895	5.00499e-10	3.20416e-09
YOR026W	213.985	-0.94615	0.152156	-6.21829	5.02607e-10	3.21456e-09
YDR267C	868	-0.634555	0.102082	-6.21615	5.09489e-10	3.25545e-09
YDR406W-A	31.8772	2.2368	0.359987	6.21357	5.17947e-10	3.30632e-09
YEL063C	1764.43	-0.594665	0.0957166	-6.21276	5.20604e-10	3.31692e-09
YPL223C	196.537	1.0066	0.162019	6.21283	5.20396e-10	3.31692e-09
YLR090W	1223.58	0.784552	0.126306	6.2115	5.248e-10	3.34045e-09
YER043C	2861.44	-0.72009	0.115938	-6.21099	5.26509e-10	3.34814e-09
YBR051W	164.94	1.12696	0.181481	6.20976	5.30667e-10	3.36493e-09
YHR172W	145.007	-1.09876	0.176935	-6.20999	5.29881e-10	3.36493e-09
YNL114C	228.402	-0.902646	0.145357	-6.20988	5.30264e-10	3.36493e-09
YLR227W-B	2256.86	0.590794	0.095166	6.20803	5.36522e-10	3.39883e-09
YBR132C	1628.24	0.678383	0.10928	6.20777	5.37402e-10	3.40116e-09
YFR024C-A	1491.42	0.71337	0.114926	6.20723	5.39266e-10	3.40972e-09
YGR214W	17253.3	-0.455453	0.0734431	-6.20144	5.59479e-10	3.53416e-09
YIL077C	1524.35	0.654988	0.105653	6.19944	5.6664e-10	3.57601e-09
YKL113C	387.11	-1.1363	0.183336	-6.19789	5.72246e-10	3.60797e-09
YEL024W	4248.66	0.804651	0.129865	6.19606	5.78955e-10	3.64681e-09
YPL146C	895.781	-0.83651	0.135011	-6.19587	5.79628e-10	3.6476e-09
YHR026W	3356.16	-0.833105	0.134519	-6.19319	5.89568e-10	3.70665e-09
YML039W	2511.77	0.616303	0.0995329	6.19195	5.94238e-10	3.73248e-09
YER024W	4079.57	0.931728	0.150592	6.18708	6.12878e-10	3.84594e-09
YGL188C	466.605	0.948684	0.153358	6.18607	6.16819e-10	3.86702e-09
YCL017C	1925.7	0.705636	0.114087	6.18507	6.20733e-10	3.8879e-09
YJL011C	114.53	-1.05965	0.171342	-6.18439	6.23418e-10	3.90105e-09
YAL015C	984.335	0.598049	0.0967276	6.18282	6.29681e-10	3.93654e-09
YDR505C	1530.09	0.619451	0.100251	6.179	6.45078e-10	4.02901e-09
YJR032W	302.171	-0.876904	0.141978	-6.17634	6.56058e-10	4.09375e-09
YDL085C-A	408.128	-0.865608	0.140193	-6.17441	6.64089e-10	4.13999e-09
YBL105C	1761.62	0.558073	0.0903952	6.17371	6.67076e-10	4.15472e-09
YKL121W	719.348	0.604197	0.0979329	6.1695	6.85079e-10	4.25888e-09
YLL045C	24615.5	-0.45191	0.0732486	-6.16953	6.84933e-10	4.25888e-09
YPL257W-B	2522.3	0.599591	0.0972026	6.16847	6.89553e-10	4.28269e-09
YGL061C	246.146	-1.11447	0.18079	-6.16444	7.0735e-10	4.38913e-09
YER162C	915.011	0.6049	0.0981315	6.16418	7.08513e-10	4.39225e-09
YGL009C	7071.61	-0.755341	0.122577	-6.1622	7.17429e-10	4.44339e-09
YGR186W	2310.21	0.575791	0.0934541	6.16121	7.21911e-10	4.46699e-09
YLL004W	142.965	-0.944264	0.153289	-6.16004	7.2727e-10	4.49597e-09
YDL003W	163.525	-1.00538	0.163297	-6.15677	7.42419e-10	4.58537e-09
YPR115W	1212.65	0.641084	0.104236	6.15031	7.73297e-10	4.77165e-09
YER138C	2558.41	0.6052	0.0984184	6.14926	7.78455e-10	4.79903e-09
YDL191W	20285.8	-0.796894	0.129614	-6.14818	7.83748e-10	4.82719e-09
YGL076C	15214.7	-0.483719	0.0786965	-6.14663	7.91444e-10	4.87009e-09
YHR161C	2851.16	0.65402	0.106416	6.1459	7.95097e-10	4.88448e-09
YNL302C	15219	-0.820452	0.133496	-6.14587	7.9525e-10	4.88448e-09
YLR157C-B	2472.8	0.597453	0.0972898	6.14097	8.20211e-10	5.03315e-09
YPR154W	1902.34	0.590703	0.096218	6.13922	8.29274e-10	5.08408e-09
YKL141W	4105.64	0.623164	0.101517	6.1385	8.3304e-10	5.10247e-09
YOL142W	552.633	-0.625959	0.10199	-6.13744	8.38641e-10	5.13205e-09
YDR361C	1108.04	-0.616366	0.100475	-6.13453	8.54122e-10	5.22199e-09
YGL050W	502.643	-0.798199	0.130198	-6.13065	8.75189e-10	5.34588e-09
YPL209C	71.6027	-1.59132	0.259613	-6.12961	8.80971e-10	5.37626e-09
YOR108W	649.886	-0.978908	0.15979	-6.1262	9.00029e-10	5.48754e-09
YGL228W	1932.56	0.556571	0.0908922	6.12342	9.15881e-10	5.57908e-09
YDR447C	9416.67	-0.728608	0.118995	-6.12302	9.18209e-10	5.58305e-09
YHR069C	756.269	-0.603811	0.0986119	-6.1231	9.17702e-10	5.58305e-09
YDR449C	269.451	-1.09889	0.179533	-6.12084	9.30862e-10	5.65482e-09
YOL103W-B	2636.6	0.580197	0.0948198	6.11894	9.41975e-10	5.71711e-09
YMR031W-A	75.6231	1.27993	0.209411	6.11208	9.83438e-10	5.96253e-09
YOR108C-A	108.551	-1.23433	0.201953	-6.11195	9.84203e-10	5.96253e-09
YLR048W	18962.2	-0.480961	0.0787089	-6.11063	9.9237e-10	6.00654e-09
YKR102W	160.327	1.06672	0.17469	6.10636	1.01931e-09	6.16401e-09
YCL009C	6832.45	0.878408	0.143877	6.10528	1.0262e-09	6.20005e-09
YPR083W	452.842	0.715966	0.117282	6.10467	1.03011e-09	6.21799e-09
YGR262C	828.638	-0.659507	0.108097	-6.10107	1.05362e-09	6.35415e-09
YLR263W	946.606	0.752456	0.123387	6.09832	1.0719e-09	6.45853e-09
YBR248C	662.875	-0.839081	0.137608	-6.09763	1.07652e-09	6.47656e-09
YOR305W	556.062	-0.755841	0.123957	-6.09758	1.07683e-09	6.47656e-09
YDR425W	1095.21	0.568027	0.093166	6.09693	1.08122e-09	6.49704e-09
YFR038W	386.154	-0.694054	0.113842	-6.09665	1.08316e-09	6.49704e-09
YNL087W	1123.27	-0.630099	0.103351	-6.09667	1.08304e-09	6.49704e-09
YPR076W	406.236	0.760572	0.124768	6.09588	1.08838e-09	6.52242e-09
YHL034C	6668.34	0.557296	0.0914665	6.0929	1.10886e-09	6.63918e-09
YMR145C	10672	0.865112	0.14203	6.09107	1.12161e-09	6.70953e-09
YJL149W	577.155	0.644623	0.105897	6.08726	1.14858e-09	6.86465e-09
YJL189W	20379.8	-0.957189	0.157288	-6.08558	1.16067e-09	6.93072e-09
YGL248W	2941.95	0.5389	0.0886099	6.08171	1.18908e-09	7.09398e-09
YLR229C	2437.1	-0.65264	0.107321	-6.08121	1.19278e-09	7.1097e-09
YPL104W	370.286	0.801027	0.131729	6.08088	1.19527e-09	7.11817e-09
YKL034W	919.812	0.643121	0.10577	6.08037	1.19904e-09	7.13426e-09
YOR344C	470.796	-0.797486	0.131292	-6.07412	1.24669e-09	7.41113e-09
YHR065C	1038.54	-0.789518	0.130008	-6.07285	1.25663e-09	7.46355e-09
YPL143W	18520	-0.591542	0.0974184	-6.07218	1.26183e-09	7.48775e-09
YGR027W-B	2648.97	0.572475	0.0943267	6.06907	1.28656e-09	7.62771e-09
YAR008W	119.525	-1.33417	0.219917	-6.0667	1.30567e-09	7.72722e-09
YMR276W	2862.73	0.821036	0.135332	6.06681	1.30478e-09	7.72722e-09
YBL058W	2414.54	0.6483	0.10687	6.06627	1.30918e-09	7.74112e-09
YPL142C	18532.7	-0.590347	0.0973279	-6.06555	1.31504e-09	7.76887e-09
YOR211C	586.335	0.743739	0.122696	6.06163	1.34752e-09	7.95371e-09
YPR158C-D	2422.83	0.573951	0.0947133	6.05988	1.36224e-09	8.03349e-09
YJR118C	841.963	-0.921285	0.152059	-6.05871	1.37215e-09	8.08478e-09
YBL027W	33203.7	-0.602498	0.0994531	-6.0581	1.37735e-09	8.10821e-09
YIL143C	1215.55	0.764485	0.126229	6.05632	1.39272e-09	8.19143e-09
YDR313C	541.765	0.806681	0.133244	6.05415	1.41157e-09	8.29499e-09
YJR091C	2400.32	0.534265	0.0882641	6.05303	1.42147e-09	8.34581e-09
YOL125W	467.213	-0.631166	0.104328	-6.04982	1.45012e-09	8.50652e-09
YGR228W	439.835	-0.728623	0.12046	-6.04867	1.46043e-09	8.55943e-09
YHR099W	1407.09	0.703534	0.116425	6.04279	1.51475e-09	8.87001e-09
YMR141W-A	110.794	-1.11677	0.18483	-6.04211	1.52114e-09	8.89962e-09
YHR027C	3170.08	0.716925	0.11875	6.03725	1.56762e-09	9.1635e-09
YBR208C	621.523	-0.781671	0.129652	-6.02897	1.65007e-09	9.63699e-09
YDR440W	231.916	-0.876491	0.145655	-6.0176	1.77024e-09	1.03298e-08
YBR066C	442.1	-0.943476	0.156799	-6.01712	1.77548e-09	1.03512e-08
YML035C	784.169	0.707067	0.11752	6.01656	1.78167e-09	1.03783e-08
YAL007C	1004.61	-0.946269	0.157304	-6.01556	1.7927e-09	1.04334e-08
YMR139W	1895.84	0.558309	0.0928417	6.01356	1.81495e-09	1.05537e-08
YOL090W	276.047	-0.822766	0.136851	-6.01214	1.83087e-09	1.06369e-08
YFR016C	1811.61	0.677002	0.112678	6.00828	1.87496e-09	1.08836e-08
YGR223C	1090.88	0.574659	0.0956658	6.00694	1.89053e-09	1.09609e-08
YLR425W	695.089	0.592856	0.0986965	6.00685	1.89157e-09	1.09609e-08
YLR438W	1352.23	0.753693	0.125483	6.00632	1.8978e-09	1.09874e-08
YKL127W	825.852	-0.661332	0.110119	-6.00562	1.90603e-09	1.10255e-08
YDL181W	1710.51	0.691751	0.115211	6.00421	1.92265e-09	1.1112e-08
YMR117C	273.895	-0.975975	0.162575	-6.00324	1.93416e-09	1.11688e-08
YAL031C	822.325	0.574418	0.0957203	6.00101	1.96097e-09	1.13138e-08
YIL050W	830.28	0.638112	0.106482	5.99266	2.06439e-09	1.19002e-08
YBR047W	518.098	0.831961	0.138842	5.99216	2.07078e-09	1.19267e-08
YGR053C	199.274	0.869428	0.145196	5.98795	2.12505e-09	1.22287e-08
YIL075C	4323.9	0.742369	0.124091	5.98244	2.1982e-09	1.26387e-08
YPL245W	187.212	-0.898455	0.150202	-5.98165	2.20894e-09	1.26895e-08
YIL035C	1637.42	-0.544201	0.0909919	-5.98077	2.22091e-09	1.27472e-08
YNL050C	637.758	-0.672345	0.112511	-5.97581	2.28943e-09	1.31292e-08
YEL053W-A	8993.43	-0.70613	0.118168	-5.97562	2.29211e-09	1.31333e-08
YIL056W	1618.04	1.09374	0.183094	5.97364	2.32011e-09	1.32823e-08
YFL055W	236.583	0.806497	0.135017	5.97331	2.32484e-09	1.32974e-08
YOL087C	1520.2	0.631562	0.105733	5.97318	2.32675e-09	1.32974e-08
YER001W	367.87	-0.716693	0.120003	-5.9723	2.33934e-09	1.33579e-08
YIL146C	421.456	0.80964	0.135582	5.9716	2.34944e-09	1.34041e-08
YPL165C	576.381	0.72796	0.121928	5.97041	2.36664e-09	1.34906e-08
YJL132W	516.365	0.67566	0.113184	5.96956	2.3789e-09	1.35489e-08
YLR001C	805.207	0.5962	0.0998966	5.96818	2.39922e-09	1.3653e-08
YGR136W	2485.15	0.53016	0.0888465	5.96715	2.41432e-09	1.37272e-08
YEL054C	14193.3	-0.67828	0.113687	-5.9662	2.42836e-09	1.37893e-08
YMR140W	1383.07	0.583017	0.097721	5.96613	2.42939e-09	1.37893e-08
YBL024W	802.816	-0.77213	0.129656	-5.9552	2.59758e-09	1.47314e-08
YIL105C	2217.28	0.506681	0.0851436	5.95089	2.66684e-09	1.51113e-08
YBR273C	1453.88	0.551704	0.0927572	5.94783	2.71718e-09	1.53835e-08
YDL213C	1001.4	-0.660906	0.111124	-5.94747	2.72323e-09	1.54046e-08
YNL242W	725.698	0.571708	0.096156	5.94563	2.75393e-09	1.55651e-08
YPL047W	528.024	-0.769706	0.129477	-5.94474	2.76902e-09	1.56371e-08
YPR102C	24227.8	-0.679232	0.114297	-5.9427	2.80368e-09	1.58194e-08
YOL076W	146.942	-1.01688	0.171147	-5.94153	2.82375e-09	1.59192e-08
YLR069C	850.454	0.885193	0.149023	5.93996	2.85095e-09	1.60589e-08
YGR229C	1255.78	-0.624018	0.105074	-5.93886	2.87007e-09	1.61529e-08
YDR060W	1035.91	-0.753137	0.126898	-5.93498	2.93884e-09	1.6526e-08
YNR058W	149.839	-0.950696	0.160249	-5.93262	2.98141e-09	1.67512e-08
YBR009C	7448.34	-1.75197	0.295339	-5.93206	2.99158e-09	1.67801e-08
YNL246W	845.668	-0.582176	0.0981401	-5.9321	2.99092e-09	1.67801e-08
YOL035C	162.709	1.11452	0.187892	5.93173	2.99755e-09	1.67994e-08
YKL044W	158.824	0.921487	0.155428	5.92871	3.05324e-09	1.70971e-08
YIR027C	148.346	0.995832	0.167994	5.92779	3.07045e-09	1.7179e-08
YNR014W	921.591	0.712897	0.120277	5.92711	3.08307e-09	1.72352e-08
YJR033C	748.001	0.619821	0.104577	5.92691	3.08681e-09	1.72416e-08
YBR106W	4539.45	-0.518216	0.0874533	-5.92563	3.11104e-09	1.73523e-08
YLR347C	596.979	0.763973	0.128928	5.92559	3.11185e-09	1.73523e-08
YDR261C-D	2433.02	0.569158	0.0961055	5.92222	3.17625e-09	1.76967e-08
YDL097C	4034.8	0.718554	0.121435	5.9172	3.27475e-09	1.82302e-08
YBR004C	1820.71	-0.84955	0.143586	-5.91666	3.28551e-09	1.82748e-08
YLR344W	9096.76	-0.528825	0.0893835	-5.91636	3.29139e-09	1.82922e-08
YNL304W	177.387	-1.06977	0.180833	-5.91578	3.30302e-09	1.83415e-08
YML116W-A	491.976	0.633864	0.107213	5.91221	3.37547e-09	1.87282e-08
YIL020C-A	487.608	-0.619883	0.104918	-5.90824	3.45791e-09	1.91697e-08
YPR138C	504.312	-0.685195	0.116075	-5.90306	3.56828e-09	1.97651e-08
YDL219W	542.937	-1.18994	0.201596	-5.9026	3.57821e-09	1.98036e-08
YGL180W	550.827	0.688227	0.116614	5.90173	3.59714e-09	1.98918e-08
YGR142W	2230.81	2.10712	0.357102	5.9006	3.62186e-09	2.00119e-08
YGR292W	419.926	0.791623	0.134172	5.90008	3.63322e-09	2.0058e-08
YEL052W	1564.81	0.687127	0.116477	5.89924	3.65188e-09	2.01443e-08
YDR166C	1058.19	0.544428	0.0922975	5.89862	3.66558e-09	2.02032e-08
YDR158W	13360.1	0.761298	0.129078	5.89799	3.6796e-09	2.02637e-08
YHR094C	1787.34	-0.881038	0.149461	-5.89479	3.75164e-09	2.06433e-08
YFR028C	348.202	-0.83686	0.141988	-5.89389	3.77218e-09	2.07392e-08
YNL144C	1958.54	0.70171	0.119074	5.89307	3.79076e-09	2.08242e-08
YJR035W	818.781	0.560501	0.0951156	5.89284	3.79611e-09	2.08364e-08
YML045W	2493.05	0.57732	0.0980596	5.88744	3.92217e-09	2.15106e-08
YBR108W	1091.42	0.636681	0.108146	5.88725	3.92676e-09	2.1518e-08
YER033C	765.524	0.657235	0.111644	5.88686	3.93595e-09	2.15506e-08
YEL040W	279.538	-1.07926	0.183356	-5.8861	3.95404e-09	2.16248e-08
YLR035C-A	868.911	0.800184	0.135946	5.88602	3.95599e-09	2.16248e-08
YPL123C	1451.04	0.585142	0.0994283	5.88506	3.97898e-09	2.17326e-08
YGL219C	1840.07	0.648482	0.110195	5.88484	3.98434e-09	2.17441e-08
YKR057W	7655.35	-0.772373	0.131297	-5.88263	4.03789e-09	2.20183e-08
YDL244W	109.418	1.00421	0.170712	5.88246	4.04202e-09	2.20227e-08
YJR029W	2732.57	0.562065	0.0955782	5.88068	4.08575e-09	2.22428e-08
YFR047C	1038.94	0.59748	0.101667	5.87681	4.18236e-09	2.27501e-08
YBL068W-A	239.172	-0.795165	0.135334	-5.87557	4.21381e-09	2.28884e-08
YNL129W	286.753	-0.813299	0.138421	-5.87554	4.21466e-09	2.28884e-08
YGR099W	341.271	-0.692884	0.117945	-5.87462	4.23803e-09	2.29966e-08
YMR198W	168.653	-0.932074	0.158698	-5.87325	4.27324e-09	2.31687e-08
YDR388W	3437.47	0.505355	0.0860567	5.87235	4.2965e-09	2.32759e-08
YDL072C	4929.56	0.52878	0.0900699	5.87077	4.33766e-09	2.34798e-08
YBR157C	211.306	-0.786769	0.134032	-5.87002	4.35735e-09	2.35672e-08
YLR112W	67.0566	-1.27006	0.216386	-5.86941	4.37359e-09	2.36359e-08
YAL039C	1661.33	0.878756	0.149772	5.86729	4.42968e-09	2.39195e-08
YER017C	860.302	0.801079	0.136536	5.86715	4.43341e-09	2.39203e-08
YKL144C	309.488	-0.91229	0.155512	-5.86636	4.45463e-09	2.40153e-08
YCR011C	1720	0.512424	0.0874314	5.86086	4.60466e-09	2.48041e-08
YOR312C	20913	-0.550115	0.0938729	-5.8602	4.62301e-09	2.48828e-08
YER182W	1135.03	0.68174	0.11639	5.85739	4.70198e-09	2.52874e-08
YNL311C	464.756	-0.704305	0.12025	-5.85702	4.71241e-09	2.5323e-08
YNL264C	434.702	-0.628218	0.107279	-5.85593	4.74338e-09	2.54689e-08
YKL128C	533.136	-0.74235	0.126795	-5.85474	4.77771e-09	2.56325e-08
YKL192C	2236.15	0.659797	0.112726	5.85309	4.82528e-09	2.58669e-08
YDL192W	4031.36	-0.670703	0.114595	-5.85283	4.83279e-09	2.58864e-08
YPL267W	151.007	-1.2138	0.207416	-5.85203	4.85599e-09	2.59897e-08
YGR085C	17673.6	-0.641124	0.109582	-5.85064	4.89678e-09	2.61869e-08
YOR117W	2963.17	0.712778	0.121854	5.84944	4.93216e-09	2.6355e-08
YOR253W	786.026	-0.87395	0.14944	-5.84818	4.96989e-09	2.65353e-08
YHR112C	633.616	0.619926	0.106088	5.84348	5.11201e-09	2.72722e-08
YGR081C	1168.08	-0.624888	0.106955	-5.84251	5.14203e-09	2.74105e-08
YLL006W	541.733	0.640591	0.109655	5.84187	5.16181e-09	2.74939e-08
YIL127C	1125.37	-0.76375	0.130778	-5.84005	5.21842e-09	2.77731e-08
YML057W	1903.37	0.556591	0.0953205	5.83916	5.24647e-09	2.79002e-08
YMR302C	1521.04	0.780211	0.133655	5.83752	5.29837e-09	2.81537e-08
YBL093C	981.2	-0.567317	0.0972016	-5.8365	5.33089e-09	2.82813e-08
YNR009W	89.0311	-1.1708	0.200599	-5.83652	5.33023e-09	2.82813e-08
YMR307C-A	469.49	-0.750055	0.128523	-5.83596	5.34819e-09	2.83505e-08
YJL134W	518.871	-0.775155	0.132844	-5.83508	5.37638e-09	2.84773e-08
YNL225C	402.62	-0.762754	0.13073	-5.83458	5.39259e-09	2.85404e-08
YML056C	1187.28	-0.755046	0.129454	-5.83257	5.45815e-09	2.88645e-08
YGL072C	334.487	0.816648	0.140041	5.8315	5.49297e-09	2.90256e-08
YDL177C	126.001	-1.14587	0.196563	-5.82956	5.55733e-09	2.93423e-08
YEL071W	2378.85	-0.713659	0.12246	-5.82767	5.62067e-09	2.96533e-08
YIL023C	1193.94	0.611458	0.104953	5.82604	5.67586e-09	2.99207e-08
YOR059C	1145.09	0.642409	0.11027	5.8258	5.68393e-09	2.99396e-08
YFR033C	7793.66	0.772159	0.132555	5.82518	5.70514e-09	3.00275e-08
YKL027W	471.055	-0.940763	0.161523	-5.82434	5.73378e-09	3.01544e-08
YDL161W	2124.74	0.551974	0.0947887	5.82321	5.77281e-09	3.03357e-08
YPR132W	24443.9	-0.686124	0.117845	-5.82228	5.80509e-09	3.04813e-08
YHL034W-A	3041.84	0.593755	0.101986	5.82192	5.81767e-09	3.05233e-08
YHR047C	902.94	0.642753	0.110468	5.81846	5.93924e-09	3.11366e-08
YER080W	1984.89	0.568652	0.0977359	5.81825	5.94677e-09	3.11515e-08
YBL047C	2921.2	0.605873	0.104216	5.81362	6.11351e-09	3.19998e-08
YLR018C	362.572	-0.690102	0.118737	-5.81201	6.17274e-09	3.22844e-08
YCR081W	394.121	0.640246	0.110308	5.80419	6.46786e-09	3.38014e-08
YLR134W	450.225	0.618056	0.106488	5.80401	6.47485e-09	3.38114e-08
YOL120C	30734.2	-0.683672	0.117838	-5.80181	6.56009e-09	3.42297e-08
YML023C	453.696	-0.662328	0.114228	-5.79828	6.69973e-09	3.49309e-08
YOR294W	529.396	-0.666424	0.114957	-5.79719	6.74373e-09	3.51328e-08
YML121W	609.286	-0.619468	0.106873	-5.79633	6.77828e-09	3.52852e-08
YOR096W	17937.5	-0.595404	0.102728	-5.79592	6.79484e-09	3.53438e-08
YKR058W	1711.25	0.516181	0.0890843	5.79429	6.86107e-09	3.56604e-08
YAR028W	443.573	-0.800238	0.138123	-5.79366	6.88668e-09	3.57377e-08
YPL158C	445.277	-0.876196	0.151233	-5.79367	6.88661e-09	3.57377e-08
YKL172W	1512.78	-0.684399	0.118153	-5.79247	6.93604e-09	3.59658e-08
YJL053W	1243.65	0.509847	0.0880255	5.79204	6.95358e-09	3.60287e-08
YFR032C-A	11456.3	-0.856255	0.14786	-5.79098	6.99758e-09	3.62285e-08
YGR213C	154.717	1.0073	0.174059	5.78715	7.15891e-09	3.7035e-08
YGR244C	5240.07	0.459037	0.0793307	5.78637	7.19217e-09	3.71782e-08
YDR459C	269.445	-0.783583	0.135423	-5.78619	7.20018e-09	3.71907e-08
YPR140W	879.1	0.737501	0.127603	5.77964	7.48609e-09	3.86375e-08
YBR233W-A	272.29	-1.06187	0.183737	-5.7793	7.50141e-09	3.86866e-08
YJR063W	117.329	-1.04167	0.180354	-5.7757	7.66327e-09	3.94908e-08
YDR232W	1173.68	0.780817	0.135325	5.76994	7.93016e-09	4.08345e-08
YIL085C	816.499	-0.544779	0.0944397	-5.76853	7.99639e-09	4.11437e-08
YGL096W	565.421	0.779301	0.135104	5.76816	8.01422e-09	4.12036e-08
YBL078C	2003.42	0.607417	0.105407	5.76258	8.2839e-09	4.25572e-08
YHR021C	16759.4	-0.873116	0.151523	-5.76228	8.29834e-09	4.25986e-08
YPL184C	701.669	0.718617	0.12482	5.75722	8.55119e-09	4.38627e-08
YHR154W	281.74	-0.885631	0.153833	-5.75709	8.55782e-09	4.3863e-08
YJL141C	4355.07	0.533542	0.0927261	5.75396	8.71761e-09	4.46476e-08
YHR143W-A	529.53	-0.807083	0.14033	-5.75132	8.85501e-09	4.53164e-08
YBL005W-B	1380.8	0.680728	0.118369	5.75091	8.87645e-09	4.53912e-08
YDR042C	75.8567	-1.13806	0.197987	-5.74815	9.02238e-09	4.61021e-08
YGL208W	1033.19	0.611683	0.106424	5.74759	9.05265e-09	4.61858e-08
YOR102W	782.711	-0.987755	0.171853	-5.74766	9.04853e-09	4.61858e-08
YER110C	853.879	-0.823791	0.143336	-5.74726	9.07036e-09	4.62408e-08
YLR121C	1001.92	0.544523	0.0947637	5.74611	9.13199e-09	4.65193e-08
YDR461W	937.7	0.671827	0.116989	5.74266	9.31981e-09	4.74398e-08
YKL216W	9345.16	-1.78255	0.310449	-5.74186	9.36419e-09	4.76293e-08
YEL048C	118.675	-1.0086	0.175691	-5.74078	9.4244e-09	4.7899e-08
YER145C-A	867.513	-1.0988	0.191453	-5.73924	9.51019e-09	4.82981e-08
YKL211C	1580.68	-0.585263	0.102009	-5.73736	9.61652e-09	4.88009e-08
YER118C	457.973	-0.790547	0.137798	-5.737	9.63693e-09	4.88672e-08
YHR068W	1188.37	-0.666132	0.116135	-5.73583	9.70363e-09	4.9168e-08
YLR370C	2350.9	0.51946	0.0905919	5.73406	9.80522e-09	4.9645e-08
YJR117W	1635.67	0.82346	0.143759	5.72807	1.01582e-08	5.13932e-08
YPL254W	255.866	-0.732903	0.127998	-5.7259	1.02887e-08	5.2014e-08
YCR075C	207.121	-1.01601	0.177447	-5.72571	1.03004e-08	5.20337e-08
YCR030C	1270.55	0.560506	0.0978961	5.72552	1.0312e-08	5.20527e-08
YOR020W-A	703.566	0.725623	0.126744	5.72512	1.0336e-08	5.21341e-08
YML130C	1198.16	1.04682	0.182882	5.72403	1.04028e-08	5.24315e-08
YBR101C	3227.68	0.889901	0.155477	5.7237	1.04228e-08	5.24926e-08
YNR007C	968.283	0.560309	0.0979368	5.72112	1.05821e-08	5.32545e-08
YFL045C	4288.96	-0.777657	0.135945	-5.72038	1.06285e-08	5.34474e-08
YJR125C	2438.74	0.486517	0.08509	5.71768	1.07989e-08	5.42635e-08
YDL194W	847.775	0.553666	0.0968909	5.71432	1.10142e-08	5.53036e-08
YOR161C	1854.43	0.553569	0.0969204	5.71158	1.11931e-08	5.61596e-08
YCL026C-A	120.306	2.22733	0.390017	5.71085	1.12413e-08	5.63591e-08
YGR208W	157.456	-0.947511	0.166062	-5.70577	1.15816e-08	5.79846e-08
YLR103C	119.768	-1.10036	0.192851	-5.70575	1.1583e-08	5.79846e-08
YOL010W	462.083	-0.604629	0.10599	-5.70459	1.16625e-08	5.83386e-08
YBR177C	3219.83	0.491852	0.0862273	5.70413	1.16936e-08	5.84504e-08
YNL162W	11485.4	-0.778514	0.136496	-5.70359	1.17312e-08	5.85944e-08
YLR212C	221.693	-0.826176	0.144939	-5.70015	1.19704e-08	5.97445e-08
YBR225W	790.045	0.555929	0.097572	5.69763	1.21486e-08	6.05884e-08
YPL164C	567.239	0.621531	0.109106	5.69657	1.22241e-08	6.09192e-08
YKL116C	447.468	-0.827395	0.14529	-5.6948	1.23519e-08	6.15102e-08
YBL005W	464.244	0.868331	0.152485	5.69453	1.23709e-08	6.15476e-08
YER009W	4988.74	-0.732741	0.12868	-5.69431	1.23872e-08	6.15476e-08
YER157W	458.107	-0.642157	0.112771	-5.69434	1.2385e-08	6.15476e-08
YPL208W	283.689	-0.798638	0.140256	-5.69413	1.24002e-08	6.15665e-08
YBR233W	146.575	-0.973193	0.170944	-5.69307	1.24778e-08	6.19055e-08
YMR242C	21736.7	-0.779416	0.13691	-5.6929	1.24898e-08	6.19188e-08
YNL135C	7307.54	-0.786661	0.138234	-5.69081	1.26441e-08	6.2637e-08
YGR132C	2314.76	0.645472	0.113459	5.68903	1.27762e-08	6.31977e-08
YOR320C	567.307	-0.676873	0.118976	-5.68915	1.27674e-08	6.31977e-08
YHR074W	1336.18	0.517663	0.0910188	5.68742	1.28969e-08	6.37474e-08
YHR043C	1850.87	0.564694	0.0993559	5.68354	1.31932e-08	6.51633e-08
YPL124W	176.539	-0.912935	0.160659	-5.68245	1.32777e-08	6.55321e-08
YKL129C	1021	0.583515	0.102739	5.67956	1.35039e-08	6.65992e-08
YPR041W	1515.13	-0.657586	0.115804	-5.67842	1.35947e-08	6.69975e-08
YML081C-A	2661.04	0.596304	0.105037	5.67707	1.37025e-08	6.74785e-08
YHR170W	2135.72	-0.536524	0.094514	-5.67666	1.3735e-08	6.75888e-08
YIL123W	1700.65	-0.61633	0.108601	-5.6752	1.38527e-08	6.81176e-08
YOR179C	536.048	-0.602997	0.106255	-5.67503	1.38666e-08	6.81355e-08
YPR137C-B	2594.04	0.514824	0.0907917	5.67039	1.42471e-08	6.99536e-08
YHL002W	1749.55	0.572156	0.100914	5.66973	1.4302e-08	7.01713e-08
YER129W	811.673	0.636757	0.112332	5.66853	1.4403e-08	7.06152e-08
YER127W	206.924	-0.952078	0.168063	-5.665	1.47028e-08	7.2032e-08
YDL063C	267.852	-0.836865	0.147754	-5.6639	1.47974e-08	7.24418e-08
YOR289W	1722.55	0.722704	0.127612	5.6633	1.4849e-08	7.26412e-08
YGR151C	198.153	-1.19131	0.210389	-5.66244	1.49238e-08	7.29533e-08
YOR136W	5396	0.549102	0.0970124	5.66012	1.51269e-08	7.38922e-08
YIL094C	13815.5	-0.863911	0.152744	-5.65595	1.54983e-08	7.55954e-08
YLR285W	757.268	-0.849248	0.15015	-5.65599	1.54954e-08	7.55954e-08
YML060W	120.193	-1.02562	0.181345	-5.65563	1.55277e-08	7.56831e-08
YFR005C	275.79	-0.724396	0.128089	-5.6554	1.5548e-08	7.57269e-08
YBR070C	408.712	-1.2336	0.218153	-5.65475	1.56076e-08	7.59615e-08
YKR091W	1987.02	0.567832	0.100422	5.65448	1.56315e-08	7.60222e-08
YHR018C	7742.54	-0.436055	0.0771453	-5.65239	1.58231e-08	7.68978e-08
YCR024C-B	1374.13	-0.629877	0.111461	-5.65108	1.59444e-08	7.74311e-08
YLR002C	415.339	-0.900523	0.159396	-5.64959	1.60826e-08	7.80453e-08
YNL327W	1529.35	-1.69342	0.299791	-5.64866	1.61706e-08	7.84151e-08
YKL042W	260.4	-0.782626	0.13865	-5.64463	1.65538e-08	8.02147e-08
YBR048W	16466.1	-0.657147	0.116437	-5.64381	1.66331e-08	8.05405e-08
YML016C	1247.25	0.562614	0.0997357	5.64105	1.69017e-08	8.17816e-08
YOL155C	9020.5	0.760429	0.134823	5.64018	1.69871e-08	8.2135e-08
YDR037W	5067.39	-0.809443	0.143523	-5.63983	1.70219e-08	8.22435e-08
YBR162C	5442.56	-0.62672	0.111311	-5.63036	1.79833e-08	8.68259e-08
YJR057W	526.489	-0.644452	0.11463	-5.62204	1.8872e-08	9.10505e-08
YMR116C	31347	-0.470863	0.0838082	-5.61834	1.92796e-08	9.29499e-08
YDL078C	2939.84	0.525791	0.0936038	5.6172	1.94079e-08	9.35005e-08
YOR354C	762.044	0.564542	0.100507	5.61692	1.94394e-08	9.35846e-08
YLR454W	1267.85	0.562823	0.100268	5.61317	1.98653e-08	9.55657e-08
YMR050C	2751.89	0.484245	0.086277	5.61268	1.99218e-08	9.57457e-08
YNL178W	52035.9	-0.629379	0.112137	-5.6126	1.99314e-08	9.57457e-08
YHR066W	251.296	-0.84006	0.149696	-5.61178	2.00256e-08	9.61287e-08
YML102W	457.272	-0.65677	0.117075	-5.60982	2.02533e-08	9.70817e-08
YML087C	504.921	0.65945	0.117551	5.60992	2.02422e-08	9.70817e-08
YKR026C	734.991	-0.679724	0.121187	-5.60888	2.03641e-08	9.75425e-08
YDR527W	410.504	-0.692546	0.123484	-5.60838	2.04226e-08	9.77524e-08
YDR380W	343.957	-0.834602	0.148904	-5.60496	2.08305e-08	9.96331e-08
YDR472W	377.98	-0.834344	0.148879	-5.60417	2.09254e-08	1.00015e-07
YOR216C	458.22	-0.751963	0.13419	-5.60371	2.09815e-08	1.00212e-07
YLR207W	719.38	0.608763	0.108665	5.60221	2.11634e-08	1.01008e-07
YOR304C-A	252.452	-0.9193	0.164146	-5.60052	2.13712e-08	1.01926e-07
YLR237W	386.333	0.619491	0.110616	5.60037	2.1389e-08	1.01939e-07
YJR070C	1573.66	-0.765465	0.136689	-5.60004	2.14303e-08	1.02062e-07
YGR038C-B	2507.68	0.511571	0.0913664	5.59912	2.15446e-08	1.02533e-07
YDL011C	234.065	-1.00065	0.178737	-5.59842	2.16312e-08	1.02872e-07
YDR347W	791.53	0.627234	0.112097	5.59546	2.20037e-08	1.04568e-07
YOL082W	1572.72	0.555243	0.099245	5.59467	2.21042e-08	1.04971e-07
YKL149C	341.506	-0.820806	0.146722	-5.59431	2.21503e-08	1.05115e-07
YMR209C	456.21	-0.660275	0.118055	-5.59294	2.23251e-08	1.05869e-07
YOL039W	17671.5	-0.654991	0.11715	-5.59105	2.25702e-08	1.06955e-07
YPL273W	2689.16	-0.555375	0.099343	-5.59048	2.26448e-08	1.07233e-07
YER146W	1137.85	-1.07855	0.192974	-5.58909	2.28266e-08	1.08017e-07
YOL005C	853.401	-0.682251	0.122089	-5.58814	2.29516e-08	1.08531e-07
YHR205W	1103.62	0.621974	0.111406	5.58295	2.36466e-08	1.11738e-07
YMR045C	1599.7	0.608694	0.109032	5.58272	2.36792e-08	1.11813e-07
YKL109W	6126.77	0.815735	0.146152	5.58141	2.38578e-08	1.12576e-07
YLR074C	1593.13	-0.49173	0.088106	-5.58112	2.38971e-08	1.12682e-07
YDR329C	1513.85	0.469966	0.0842085	5.58097	2.39178e-08	1.127e-07
YOR393W	71.2169	1.17087	0.209828	5.58015	2.40318e-08	1.13157e-07
YBR299W	368.872	0.702919	0.125994	5.57897	2.41946e-08	1.13843e-07
YKL106W	221.977	-0.749507	0.134353	-5.57863	2.4242e-08	1.13985e-07
YPR142C	380.087	-0.729564	0.130795	-5.57794	2.43387e-08	1.14359e-07
YDR006C	1086.79	0.637511	0.114315	5.57677	2.4503e-08	1.15008e-07
YFL008W	286.594	-0.92118	0.165183	-5.57671	2.45112e-08	1.15008e-07
YNL038W	643.047	-0.895359	0.160559	-5.5765	2.45406e-08	1.15064e-07
YBL097W	212.447	-0.895339	0.160622	-5.5742	2.48667e-08	1.16511e-07
YDR336W	519.543	-0.875919	0.157163	-5.57332	2.49926e-08	1.17019e-07
YOR236W	312.491	-1.04229	0.187027	-5.57292	2.505e-08	1.17205e-07
YLR049C	439.278	-1.21413	0.217889	-5.57226	2.51462e-08	1.17573e-07
YLR028C	3781.85	0.475817	0.0854063	5.57122	2.52965e-08	1.18192e-07
YKR096W	1387.39	0.620856	0.111544	5.56604	2.606e-08	1.21674e-07
YPL281C	71.0439	1.16639	0.209571	5.56561	2.6124e-08	1.21888e-07
YPL135W	2986.5	0.47038	0.0845179	5.56544	2.6149e-08	1.21919e-07
YPL129W	2332.38	-0.609289	0.109496	-5.5645	2.6291e-08	1.22495e-07
YHR037W	1358.04	0.669674	0.120369	5.56352	2.64389e-08	1.23098e-07
YKL065W-A	133.457	1.15638	0.207965	5.56045	2.69086e-08	1.25198e-07
YMR010W	367.112	-0.74758	0.13445	-5.5603	2.69315e-08	1.25216e-07
YGL020C	911.442	-0.612258	0.110166	-5.55758	2.73539e-08	1.27092e-07
YDR316W-B	2718.62	0.481147	0.0866508	5.55271	2.81278e-08	1.30596e-07
YNR055C	1061.01	0.52675	0.0948906	5.55113	2.83833e-08	1.31691e-07
YDL113C	1718.85	0.47891	0.0862882	5.55012	2.85467e-08	1.32264e-07
YPR137W	227.042	-1.02031	0.183833	-5.55019	2.85354e-08	1.32264e-07
YJR105W	2020.14	-0.586353	0.105663	-5.54926	2.86875e-08	1.32824e-07
YLR064W	736.051	0.957383	0.172581	5.54745	2.89865e-08	1.34115e-07
YOR142W	3896.51	0.466719	0.0841701	5.54495	2.94046e-08	1.35956e-07
YDR381C-A	881.556	0.616638	0.11126	5.5423	2.98517e-08	1.37927e-07
YPR158W-B	2719.06	0.475957	0.0858814	5.54203	2.98992e-08	1.38051e-07
YLR349W	297.138	-0.898573	0.162168	-5.54098	3.00776e-08	1.38707e-07
YNL237W	419.233	0.78254	0.141229	5.54095	3.00831e-08	1.38707e-07
YOR310C	1860.54	-0.692224	0.124937	-5.54057	3.0149e-08	1.38915e-07
YOR142W-B	2754.74	0.473135	0.0854547	5.53668	3.08255e-08	1.41934e-07
YNL013C	62.3664	1.34245	0.242482	5.5363	3.08922e-08	1.42143e-07
YKR002W	928.615	0.568751	0.102771	5.53415	3.12734e-08	1.43797e-07
YAL024C	137.514	-0.941067	0.170117	-5.53188	3.16819e-08	1.45575e-07
YNL056W	1095.34	-0.642232	0.116115	-5.53101	3.18397e-08	1.46199e-07
YFL061W	476.762	-0.867837	0.157009	-5.52733	3.25147e-08	1.49196e-07
YGL102C	31303.5	-0.641383	0.116075	-5.52561	3.28343e-08	1.50558e-07
YNL223W	568.749	0.62362	0.112951	5.52115	3.36794e-08	1.54327e-07
YBR084W	1443.19	-0.845979	0.15342	-5.51414	3.50497e-08	1.60496e-07
YOL152W	97.6523	1.06749	0.193614	5.5135	3.51772e-08	1.60903e-07
YOR103C	816.576	-0.957331	0.173636	-5.51345	3.51869e-08	1.60903e-07
YOR115C	810.199	-0.765553	0.138864	-5.51299	3.52792e-08	1.61214e-07
YGL103W	31832.9	-0.641438	0.116407	-5.51029	3.58239e-08	1.63591e-07
YAL067C	98.1013	1.11819	0.203111	5.5053	3.68535e-08	1.68177e-07
YLR407W	302.929	-0.775034	0.140786	-5.50504	3.69079e-08	1.6831e-07
YHR131C	679.648	0.648472	0.117803	5.50474	3.69714e-08	1.68485e-07
YJL107C	910.406	-0.580501	0.105492	-5.50278	3.73845e-08	1.7025e-07
YHR039C-A	3079.89	-0.624367	0.113676	-5.4925	3.96291e-08	1.80349e-07
YOR209C	2790.02	-0.542038	0.0987232	-5.49048	4.00833e-08	1.82291e-07
YCR047C	723.962	-0.624047	0.113677	-5.48965	4.02735e-08	1.83031e-07
YHL025W	1101.71	-0.578316	0.105362	-5.48884	4.04581e-08	1.83745e-07
YJL036W	2014.66	0.465562	0.0848262	5.48843	4.05532e-08	1.84051e-07
YKL079W	1075.46	0.684156	0.124668	5.4878	4.06967e-08	1.84451e-07
YLR150W	28945.2	-0.449984	0.081996	-5.48788	4.06797e-08	1.84451e-07
YJL037W	73.74	1.14064	0.20795	5.48519	4.13027e-08	1.8707e-07
YDR096W	2031.83	0.614221	0.111986	5.48479	4.1396e-08	1.87365e-07
YPL037C	7712.45	-0.647488	0.118081	-5.48343	4.17169e-08	1.88689e-07
YOL101C	120.928	1.15555	0.210798	5.48182	4.20971e-08	1.9028e-07
YCL004W	372.067	0.63438	0.11577	5.47966	4.26152e-08	1.92491e-07
YBR162W-A	1028.23	-0.824906	0.150555	-5.4791	4.27501e-08	1.92839e-07
YBR237W	826.52	0.600826	0.109658	5.47911	4.27477e-08	1.92839e-07
YIL048W	1003.79	0.573376	0.104692	5.47679	4.33115e-08	1.95239e-07
YNL335W	511.75	-0.866349	0.158267	-5.47396	4.40077e-08	1.98243e-07
YGR146C	670.374	0.891775	0.163015	5.4705	4.4878e-08	2.02027e-07
YDR262W	1405.5	0.555129	0.101512	5.46861	4.53591e-08	2.04055e-07
YMR160W	717.196	0.555092	0.101541	5.46666	4.58607e-08	2.06172e-07
YJR049C	1104.72	0.638914	0.11688	5.46642	4.59218e-08	2.06236e-07
YJR156C	85.9628	1.05278	0.192593	5.46636	4.59369e-08	2.06236e-07
YLR299W	1629.39	0.59662	0.109192	5.46396	4.65638e-08	2.0891e-07
YHL015W	52067	-0.891215	0.163115	-5.46372	4.6626e-08	2.09048e-07
YNL073W	1074.86	0.740334	0.135621	5.45886	4.79212e-08	2.1471e-07
YCL012C	341.501	0.763716	0.139927	5.45796	4.81647e-08	2.15656e-07
YJL191W	3797.37	-0.580615	0.106424	-5.45567	4.87885e-08	2.18302e-07
YMR237W	1645.61	0.509034	0.0933536	5.45275	4.95958e-08	2.21766e-07
YDL076C	823.955	-0.500595	0.0918418	-5.45062	5.01958e-08	2.24298e-07
YGL071W	638.695	0.655795	0.120354	5.4489	5.06822e-08	2.26319e-07
YJR010C-A	299.913	-0.796369	0.146176	-5.44801	5.09374e-08	2.27089e-07
YLR127C	648.591	0.588294	0.107985	5.44794	5.09569e-08	2.27089e-07
YNL182C	339.017	-0.953561	0.17503	-5.448	5.09396e-08	2.27089e-07
YGR128C	555.647	-0.727228	0.133551	-5.44533	5.17104e-08	2.30293e-07
YLR240W	746.426	0.530127	0.0973893	5.44339	5.22769e-08	2.3266e-07
YAR042W	1417.13	0.58443	0.10738	5.44265	5.24945e-08	2.33473e-07
YHR152W	426.997	-1.02844	0.189065	-5.43963	5.33917e-08	2.37304e-07
YPR172W	1666.6	0.615622	0.113236	5.43663	5.4297e-08	2.41167e-07
YGR176W	30.9912	-1.59298	0.293179	-5.43347	5.52674e-08	2.45313e-07
YGR024C	1326.12	-0.822884	0.151505	-5.43139	5.59161e-08	2.48028e-07
YOR197W	2282.63	0.540473	0.0995333	5.43007	5.63307e-08	2.497e-07
YCL044C	365.027	0.690207	0.127117	5.42968	5.6454e-08	2.5008e-07
YOL146W	516.165	-0.941644	0.17353	-5.4264	5.75011e-08	2.54549e-07
YKL195W	3127.92	0.625316	0.115242	5.4261	5.75979e-08	2.54809e-07
YOL029C	233.769	-0.821066	0.151421	-5.42242	5.87975e-08	2.59943e-07
YKL204W	1234.07	0.650038	0.119888	5.42204	5.89235e-08	2.60327e-07
YGR161C-D	2638.46	0.461769	0.0851707	5.42169	5.90372e-08	2.60656e-07
YKL051W	591.747	0.733764	0.135504	5.41507	6.12649e-08	2.70313e-07
YGR249W	1495.97	0.738486	0.136448	5.41219	6.22572e-08	2.74509e-07
YEL051W	3127.36	-0.615687	0.113792	-5.41062	6.28057e-08	2.76744e-07
YOR034C-A	99.6377	0.984281	0.181925	5.41035	6.29007e-08	2.76979e-07
YMR309C	916.648	-0.755343	0.13969	-5.40728	6.39886e-08	2.81583e-07
YDR033W	6392.24	-0.650634	0.120376	-5.40502	6.48028e-08	2.84978e-07
YNL037C	3146.91	0.664613	0.12302	5.40249	6.57232e-08	2.88835e-07
YJL080C	1426.91	-0.812589	0.1505	-5.39927	6.6911e-08	2.93668e-07
YKL108W	127.398	-0.927303	0.171745	-5.3993	6.6901e-08	2.93668e-07
YGL258W-A	57.4046	1.18472	0.219491	5.39757	6.75513e-08	2.96282e-07
YOR039W	1543.64	-0.510687	0.0946244	-5.39699	6.77697e-08	2.97044e-07
YPL177C	1078.15	0.489663	0.0907416	5.39623	6.80558e-08	2.98102e-07
YDR247W	911.787	0.612906	0.113633	5.39372	6.9014e-08	3.01704e-07
YLR175W	3154.08	-0.582466	0.107988	-5.39379	6.89861e-08	3.01704e-07
YNL283C	449.523	-0.680436	0.126151	-5.39383	6.8973e-08	3.01704e-07
YEL003W	857.609	-0.686449	0.127366	-5.3896	7.06156e-08	3.08503e-07
YKL021C	1592.34	-0.583598	0.108294	-5.389	7.08489e-08	3.09319e-07
YKL147C	350.964	0.74247	0.137808	5.3877	7.13648e-08	3.11368e-07
YJL091C	332.715	-0.822166	0.152679	-5.38492	7.24775e-08	3.16015e-07
YKL025C	684.56	0.539941	0.100286	5.38404	7.28326e-08	3.17356e-07
YDR452W	2356.85	0.441305	0.0819687	5.38383	7.29189e-08	3.17402e-07
YHR009C	1370.16	0.51113	0.0949389	5.38378	7.29385e-08	3.17402e-07
YGR022C	241.425	0.852465	0.158381	5.38236	7.35163e-08	3.19707e-07
YPL249C-A	27809.7	-0.744365	0.138354	-5.38013	7.44307e-08	3.23472e-07
YGR290W	218.21	0.738633	0.137315	5.37911	7.48569e-08	3.25112e-07
YDR353W	3303.7	-0.484609	0.0901622	-5.37486	7.66422e-08	3.32649e-07
YER119C	717.374	0.59705	0.111135	5.3723	7.77395e-08	3.37192e-07
YMR261C	2641.18	0.563311	0.104879	5.37105	7.82798e-08	3.39314e-07
YOL079W	47.1235	-1.37903	0.256899	-5.36797	7.96288e-08	3.44937e-07
YPL250W-A	27571.4	-0.744424	0.138771	-5.36442	8.12104e-08	3.5156e-07
YOR035C	1836.89	0.472172	0.0880822	5.36059	8.29519e-08	3.58865e-07
YOR248W	2678.6	-0.598561	0.111742	-5.35662	8.47928e-08	3.66591e-07
YGR179C	358.872	-0.675063	0.126028	-5.35647	8.48645e-08	3.66663e-07
YBR191W-A	1926.16	-0.513042	0.0958516	-5.35247	8.67635e-08	3.74625e-07
YJL087C	196.649	-0.806581	0.150704	-5.3521	8.69408e-08	3.75006e-07
YOR317W	7602.99	0.612934	0.114523	5.35205	8.69644e-08	3.75006e-07
YOL023W	416.512	0.636364	0.11899	5.34806	8.89008e-08	3.83108e-07
YLR210W	156.956	-0.805714	0.1507	-5.34647	8.9688e-08	3.8625e-07
YBR271W	248.076	-0.716242	0.134016	-5.34446	9.06856e-08	3.90042e-07
YPL241C	229.242	-0.737485	0.137988	-5.34454	9.06456e-08	3.90042e-07
YER004W	1592.72	0.746228	0.13965	5.34356	9.11373e-08	3.91732e-07
YCR024C-A	869.799	-0.648206	0.121313	-5.34325	9.1297e-08	3.92165e-07
YLR197W	2606.74	-0.620514	0.11625	-5.33776	9.41011e-08	4.03949e-07
YEL047C	1216.81	0.500661	0.0937994	5.33757	9.42006e-08	4.04116e-07
YPL197C	4550.3	-0.412216	0.0773185	-5.33141	9.74556e-08	4.1781e-07
YDL057W	589.548	0.555315	0.104185	5.33011	9.81533e-08	4.20531e-07
YDR098C-B	2578.91	0.448872	0.0842592	5.32727	9.97006e-08	4.26885e-07
YLR065C	1202.79	-0.874147	0.164332	-5.31941	1.04107e-07	4.45466e-07
YDR479C	1235.67	0.496878	0.0934842	5.3151	1.06597e-07	4.55829e-07
YMR142C	29623.9	-0.617253	0.116156	-5.314	1.07247e-07	4.58312e-07
YLR154C	240.812	-0.818711	0.154151	-5.31111	1.08957e-07	4.65322e-07
YGL048C	4381.9	0.57938	0.109091	5.31097	1.09041e-07	4.65381e-07
YBR159W	1527.37	-0.509796	0.0960273	-5.30886	1.10312e-07	4.70203e-07
YOR166C	300.079	-0.690203	0.130008	-5.30892	1.10279e-07	4.70203e-07
YHR195W	1816.21	0.553112	0.104219	5.30721	1.11313e-07	4.73936e-07
YNL240C	756.164	0.871714	0.164252	5.30719	1.1133e-07	4.73936e-07
YER160C	2543.37	0.452039	0.0852755	5.30092	1.15218e-07	4.90175e-07
YGR027C	29066.3	-0.791284	0.149366	-5.29762	1.17325e-07	4.98817e-07
YLR062C	24685	-0.822024	0.155176	-5.29735	1.17492e-07	4.99212e-07
YLR341W	93.2634	-1.03477	0.195348	-5.29709	1.17665e-07	4.99626e-07
YDR429C	3672.28	-0.501223	0.0946867	-5.29349	1.20004e-07	5.09232e-07
YDL115C	1686.94	0.474876	0.0897263	5.29249	1.20664e-07	5.11706e-07
YOL007C	152.113	-0.940211	0.17766	-5.2922	1.20852e-07	5.12177e-07
YJR004C	399.114	0.620042	0.117188	5.291	1.21646e-07	5.15217e-07
YLR061W	24656.6	-0.821875	0.155345	-5.29064	1.21891e-07	5.15925e-07
YDL064W	657.636	-0.594557	0.112407	-5.28935	1.22754e-07	5.1892e-07
YOR234C	5481.37	-0.603932	0.114177	-5.28945	1.22685e-07	5.1892e-07
YHR214C-B	2608.79	0.465913	0.0880906	5.28902	1.22975e-07	5.19523e-07
YAL016C-A	437.34	0.617159	0.116707	5.28809	1.23597e-07	5.21819e-07
YIL169C	2374.09	0.681503	0.128879	5.28794	1.237e-07	5.21921e-07
YDL155W	456.739	-0.572232	0.108301	-5.28372	1.26586e-07	5.33761e-07
YOL165C	111.072	0.991549	0.187675	5.28333	1.26854e-07	5.34553e-07
YHR041C	265.057	-0.714259	0.13525	-5.28103	1.2846e-07	5.4098e-07
YFR027W	109.287	-0.896866	0.169845	-5.2805	1.28832e-07	5.42203e-07
YCL031C	1040.25	-0.478777	0.0906905	-5.27925	1.29717e-07	5.45235e-07
YOR086C	1750.53	0.543698	0.102987	5.27929	1.29687e-07	5.45235e-07
YJR071W	377.474	-0.716434	0.135778	-5.27652	1.31658e-07	5.53048e-07
YIL104C	162.059	-1.00875	0.191334	-5.27217	1.34819e-07	5.65969e-07
YOR301W	279.545	-0.764431	0.14501	-5.27156	1.35269e-07	5.675e-07
YOR342C	515.619	-0.716633	0.135997	-5.2695	1.36798e-07	5.73552e-07
YOR267C	2000.36	0.673464	0.127812	5.26918	1.37035e-07	5.74184e-07
YCR014C	264.919	0.684021	0.129915	5.26516	1.40071e-07	5.86037e-07
YLR409C	354.938	-0.79373	0.15075	-5.26523	1.40016e-07	5.86037e-07
YOR284W	142.837	-1.13623	0.215804	-5.26508	1.40128e-07	5.86037e-07
YBR037C	458.559	0.68265	0.129681	5.26408	1.4089e-07	5.88856e-07
YCR033W	1534.97	0.59549	0.113284	5.2566	1.46746e-07	6.1262e-07
YNL263C	571.673	-0.616596	0.1173	-5.25658	1.4676e-07	6.1262e-07
YAL033W	710.491	-0.882063	0.167829	-5.25574	1.47434e-07	6.15047e-07
YBR147W	1762.72	-0.639449	0.121767	-5.2514	1.50948e-07	6.29313e-07
YKL103C	2005.46	0.582578	0.11099	5.24894	1.52975e-07	6.37365e-07
YOR060C	550.661	-0.725982	0.13832	-5.24858	1.53279e-07	6.38231e-07
YOL163W	139.254	0.919434	0.175236	5.24684	1.54728e-07	6.43861e-07
YBR175W	109.077	-0.958124	0.182656	-5.24552	1.55844e-07	6.48102e-07
YMR152W	1291.07	0.490727	0.093595	5.24309	1.57905e-07	6.56264e-07
YOL028C	236.949	-0.737709	0.140718	-5.24245	1.58462e-07	6.58168e-07
YOR164C	1718.87	-0.904002	0.172561	-5.23873	1.61687e-07	6.71141e-07
YGR169C-A	497.659	-0.602352	0.115009	-5.23743	1.62825e-07	6.75445e-07
YBR265W	372.69	-0.603004	0.115138	-5.23723	1.63005e-07	6.7577e-07
YKL162C	361.836	0.587969	0.11227	5.23708	1.63137e-07	6.75896e-07
YJL005W	1180.87	0.471745	0.0900888	5.23645	1.63694e-07	6.77783e-07
YHR146W	4581.86	0.48982	0.0935646	5.2351	1.64892e-07	6.8232e-07
YPL007C	424.531	-0.640463	0.122361	-5.23421	1.6569e-07	6.85196e-07
YFR045W	495.078	0.717881	0.137159	5.23393	1.65947e-07	6.8583e-07
YKL081W	5178.59	-0.604713	0.115558	-5.23299	1.66794e-07	6.88905e-07
YBR261C	433.09	-0.577412	0.110362	-5.23199	1.67692e-07	6.92184e-07
YER029C	698.837	-0.576454	0.110237	-5.22921	1.70234e-07	7.02244e-07
YIL132C	79.6141	-1.21726	0.23285	-5.22763	1.71693e-07	7.07823e-07
YPL266W	1351.4	-0.69212	0.132418	-5.22679	1.72482e-07	7.10636e-07
YDR469W	662.438	-0.633465	0.121211	-5.22613	1.73098e-07	7.12731e-07
YDR235W	653.202	-0.575105	0.110106	-5.2232	1.75854e-07	7.23631e-07
YGR070W	1295.5	0.447776	0.0857905	5.21941	1.79494e-07	7.38154e-07
YGL054C	1900.43	-0.759278	0.145558	-5.21635	1.82488e-07	7.50002e-07
YKL054C	2556.25	0.715494	0.137262	5.21261	1.862e-07	7.64787e-07
YDL149W	489.473	0.614217	0.117902	5.20957	1.89284e-07	7.76974e-07
YJL178C	1184.37	-0.469304	0.0901934	-5.20331	1.95766e-07	8.03088e-07
YKL020C	1359.44	0.545118	0.104778	5.20259	1.96534e-07	8.05742e-07
YBL048W	201.579	0.846982	0.162829	5.20165	1.97522e-07	8.09292e-07
YJR080C	1147.62	0.65004	0.124972	5.20149	1.97695e-07	8.09504e-07
YLR173W	464.583	0.582004	0.111942	5.19917	2.00179e-07	8.19173e-07
YHR198C	855.476	0.506384	0.0974074	5.19862	2.0077e-07	8.21085e-07
YGL104C	608.642	0.564873	0.108664	5.19836	2.01051e-07	8.21729e-07
YER169W	519.182	0.569635	0.109602	5.1973	2.02199e-07	8.25913e-07
YHL002C-A	625.879	0.620515	0.119418	5.19615	2.03454e-07	8.3053e-07
YGR187C	308.418	-0.737874	0.14202	-5.19556	2.04101e-07	8.32663e-07
YEL017W	400.716	-0.657633	0.126633	-5.19322	2.06691e-07	8.4271e-07
YPL135C-A	1003.85	0.525297	0.101172	5.19212	2.07914e-07	8.47178e-07
YNL029C	263.312	-0.682827	0.131574	-5.18967	2.10663e-07	8.57854e-07
YOR377W	456.314	0.64853	0.125002	5.18813	2.12413e-07	8.64452e-07
YPR053C	949.103	-0.488476	0.0941552	-5.18799	2.12578e-07	8.64596e-07
YDR210C-D	2461.18	0.438689	0.0845767	5.18688	2.13841e-07	8.69203e-07
YGL031C	24740.3	-0.468279	0.0902902	-5.18638	2.14419e-07	8.71019e-07
YPR141C	220.099	-0.775588	0.149688	-5.18135	2.20287e-07	8.94311e-07
YLL019W-A	135.983	0.922144	0.178023	5.1799	2.21999e-07	9.00714e-07
YNR059W	588.06	-0.645553	0.124653	-5.17882	2.23296e-07	9.05422e-07
YBR116C	120.763	0.943136	0.182154	5.17769	2.24655e-07	9.1038e-07
YGL218W	731.706	0.6521	0.125974	5.17647	2.26127e-07	9.15788e-07
YOR047C	391.122	-0.602364	0.116389	-5.17544	2.27379e-07	9.20298e-07
YML021C	269.664	-0.71293	0.13776	-5.17514	2.27735e-07	9.2118e-07
YGL053W	1120.43	0.531514	0.102951	5.1628	2.43279e-07	9.83457e-07
YNL244C	4792.86	-0.640676	0.124202	-5.15834	2.49155e-07	1.0066e-06
YMR304W	1425.69	0.56575	0.109686	5.15789	2.49745e-07	1.00837e-06
YLR075W	64706.4	-0.485163	0.094069	-5.15752	2.50243e-07	1.00977e-06
YDR101C	477.06	-0.759504	0.147298	-5.15625	2.51946e-07	1.01603e-06
YDL140C	1847.16	0.688111	0.133646	5.14876	2.62218e-07	1.05681e-06
YNL010W	2811.78	-0.597558	0.116072	-5.14816	2.63051e-07	1.05953e-06
YGR098C	184.248	-0.886087	0.172168	-5.14663	2.65205e-07	1.06755e-06
YCR107W	310.906	0.850727	0.165308	5.14633	2.65637e-07	1.06865e-06
YMR115W	1183.73	0.562038	0.109406	5.13717	2.78906e-07	1.12135e-06
YKL132C	97.6505	-0.914952	0.178199	-5.13444	2.82981e-07	1.13705e-06
YOR124C	1542.26	0.479634	0.0934767	5.13105	2.88123e-07	1.15701e-06
YFL017C	715.055	-0.711198	0.138629	-5.13022	2.89401e-07	1.16144e-06
YDR248C	585.424	0.582133	0.113498	5.129	2.9128e-07	1.16757e-06
YML024W	25029.4	-0.691329	0.134786	-5.12907	2.91179e-07	1.16757e-06
YNL292W	481.636	-0.603521	0.117923	-5.11794	3.08883e-07	1.23739e-06
YNL138W	2393.23	0.457186	0.0893687	5.11573	3.12527e-07	1.25124e-06
YML046W	259.509	-0.683747	0.13368	-5.11479	3.1409e-07	1.25674e-06
YEL001C	2069.51	-0.487506	0.0953504	-5.11278	3.17445e-07	1.2694e-06
YGR245C	834.245	-0.808347	0.15817	-5.11062	3.21096e-07	1.28323e-06
YPR018W	244.529	-0.84914	0.166189	-5.10948	3.23042e-07	1.29023e-06
YDL029W	3134.62	0.4885	0.0956162	5.10897	3.23916e-07	1.29294e-06
YER065C	7311.34	0.79299	0.155259	5.10754	3.26377e-07	1.30199e-06
YOR220W	4393.27	0.427182	0.0836471	5.10695	3.27403e-07	1.3053e-06
YBR034C	313.262	-0.675836	0.132414	-5.10397	3.32602e-07	1.32523e-06
YGR075C	377.172	-0.632888	0.124017	-5.10323	3.33899e-07	1.32961e-06
YML013W	1033.86	0.525561	0.103039	5.1006	3.38573e-07	1.34741e-06
YKR095W-A	295.169	-0.748041	0.146769	-5.09674	3.45549e-07	1.37435e-06
YCR100C	187.965	0.762919	0.14975	5.09464	3.49413e-07	1.38889e-06
YMR301C	496.262	-0.572316	0.11236	-5.09357	3.51379e-07	1.39587e-06
YOR269W	120.95	-0.847709	0.166537	-5.09021	3.57674e-07	1.42003e-06
YNL290W	592.414	-0.544497	0.106999	-5.08881	3.60315e-07	1.42967e-06
YKL166C	196.474	-0.830648	0.16324	-5.08851	3.60887e-07	1.43108e-06
YER042W	601.006	0.826294	0.162395	5.08819	3.61501e-07	1.43266e-06
YMR092C	1655.15	0.55913	0.109892	5.08801	3.61845e-07	1.43317e-06
YOL162W	92.4993	0.959008	0.188763	5.08049	3.76455e-07	1.49015e-06
YGL189C	45200.9	-0.6125	0.120642	-5.07702	3.834e-07	1.51674e-06
YNR056C	188.211	0.746034	0.146958	5.07651	3.84428e-07	1.51991e-06
YCR079W	710.524	0.516957	0.101859	5.07521	3.8706e-07	1.5294e-06
YMR260C	7441.27	-0.643491	0.126815	-5.07427	3.88987e-07	1.53611e-06
YIL013C	349.359	0.662021	0.130563	5.07049	3.96798e-07	1.56602e-06
YBR141C	252.354	-0.659127	0.130021	-5.06937	3.99133e-07	1.5743e-06
YDR462W	584.507	0.607786	0.119937	5.06754	4.02982e-07	1.58855e-06
YOR203W	1483.54	-0.554668	0.109514	-5.06483	4.08763e-07	1.61038e-06
YPR093C	658.878	0.553576	0.109314	5.06409	4.10366e-07	1.61574e-06
YBR022W	317.812	-0.71195	0.140675	-5.06097	4.17139e-07	1.64144e-06
YDR202C	1291.86	0.463612	0.0916125	5.06057	4.17994e-07	1.64383e-06
YJR031C	354.373	-0.652394	0.128963	-5.05878	4.21948e-07	1.6584e-06
YBR140C	903.581	0.521788	0.103187	5.05671	4.26555e-07	1.67552e-06
YDL166C	453.389	-0.607576	0.120173	-5.05584	4.28511e-07	1.68192e-06
YGL246C	772.396	-0.522951	0.103437	-5.05576	4.28689e-07	1.68192e-06
YKR092C	552.341	-0.815118	0.16128	-5.05405	4.32537e-07	1.69601e-06
YDR237W	541.41	0.602104	0.119207	5.05091	4.3971e-07	1.72312e-06
YCL043C	5705.16	0.576843	0.114268	5.04817	4.46053e-07	1.74695e-06
YDR489W	240.341	-0.73202	0.14509	-5.04527	4.52874e-07	1.77262e-06
YLR306W	153.896	-0.791311	0.156933	-5.04236	4.59819e-07	1.79875e-06
YGR066C	255.467	0.856022	0.169999	5.03545	4.7672e-07	1.86377e-06
YNL082W	186.602	-0.720166	0.143035	-5.03488	4.78141e-07	1.86823e-06
YJL093C	858.009	0.543594	0.107983	5.03407	4.80179e-07	1.87509e-06
YML105C	1538.35	-0.501378	0.0997718	-5.02525	5.02783e-07	1.96221e-06
YBR012W-B	2382.79	0.421839	0.0839532	5.02469	5.04248e-07	1.96677e-06
YDR064W	22564.7	-0.50018	0.0995773	-5.02303	5.08622e-07	1.98267e-06
YGR120C	463.675	-0.615704	0.122579	-5.02292	5.08923e-07	1.98269e-06
YIR036C	837.764	0.486317	0.0968448	5.02161	5.12402e-07	1.99507e-06
YDR275W	250.213	-0.675791	0.134588	-5.02116	5.13593e-07	1.99854e-06
YNL065W	124.093	-1.17218	0.233496	-5.02014	5.16327e-07	2.00801e-06
YNL284C-B	2368.63	0.42957	0.0855825	5.01937	5.18403e-07	2.0149e-06
YJR146W	85.1002	0.982405	0.195783	5.01783	5.22582e-07	2.02996e-06
YGL190C	1380.6	0.473351	0.0944049	5.01406	5.3294e-07	2.06899e-06
YPR023C	1713.37	0.60805	0.121311	5.01234	5.37707e-07	2.08628e-06
YDL075W	30335.1	-0.645457	0.128861	-5.00896	5.4726e-07	2.12211e-06
YGR008C	17147.4	0.649162	0.129605	5.00877	5.47784e-07	2.1229e-06
YBR246W	495.503	-0.586075	0.117041	-5.00743	5.51616e-07	2.13651e-06
YKL210W	2746.75	0.673869	0.134582	5.00712	5.52516e-07	2.13875e-06
YOR182C	10127.4	-0.801432	0.160167	-5.00374	5.62286e-07	2.1753e-06
YBR137W	1092.89	0.453371	0.090744	4.99616	5.8483e-07	2.25989e-06
YMR275C	843.679	0.485839	0.0972422	4.99617	5.84807e-07	2.25989e-06
YHR045W	856.374	-0.523985	0.104893	-4.99543	5.87062e-07	2.2672e-06
YDL035C	1033.79	0.540479	0.108231	4.99378	5.92087e-07	2.28528e-06
YPR044C	19944.7	-0.555685	0.111302	-4.9926	5.95724e-07	2.29799e-06
YPR043W	19820.8	-0.555676	0.111347	-4.99048	6.02301e-07	2.32202e-06
YMR323W	53.6448	1.1484	0.230128	4.99028	6.02912e-07	2.32303e-06
YEL005C	577.665	0.522271	0.104722	4.98721	6.1258e-07	2.35891e-06
YAL034W-A	244.268	-0.795546	0.159601	-4.98459	6.20946e-07	2.38974e-06
YDR367W	707.296	-0.574948	0.115422	-4.98125	6.31745e-07	2.4299e-06
YPR149W	12005.8	0.712172	0.143031	4.97914	6.38672e-07	2.45512e-06
YOR259C	3505.41	0.615046	0.123557	4.97782	6.43036e-07	2.47048e-06
YJL002C	1760.27	-0.481243	0.0967228	-4.97549	6.50841e-07	2.49902e-06
YNL217W	1078.31	-0.655095	0.13167	-4.97528	6.51519e-07	2.50018e-06
YDL234C	5087.41	0.505491	0.101614	4.97461	6.53796e-07	2.50667e-06
YLR247C	1118.08	0.628981	0.12644	4.97456	6.53962e-07	2.50667e-06
YKL101W	395.329	-0.694814	0.139685	-4.97416	6.55325e-07	2.51045e-06
YBR192W	300.447	-0.641856	0.129061	-4.97326	6.58352e-07	2.51914e-06
YDR415C	581.903	-0.558682	0.112335	-4.97336	6.58009e-07	2.51914e-06
YLR084C	248.421	-0.726527	0.146149	-4.97115	6.65575e-07	2.54532e-06
YPR065W	2676.18	0.705954	0.142236	4.96324	6.93257e-07	2.64966e-06
YKL183W	579.756	-0.620386	0.125143	-4.95742	7.14346e-07	2.72869e-06
YCR031C	23877.3	-0.486249	0.0981057	-4.95638	7.18187e-07	2.74179e-06
YMR141C	124.093	0.921765	0.185984	4.95616	7.18989e-07	2.74328e-06
YKR089C	2693.06	0.50122	0.101145	4.95546	7.21578e-07	2.75158e-06
YLR076C	47495.8	-0.479689	0.0968236	-4.95426	7.26066e-07	2.76711e-06
YMR131C	2246.58	-0.522484	0.105469	-4.95392	7.27318e-07	2.7703e-06
YOR015W	304.88	0.648935	0.131049	4.95186	7.35085e-07	2.79828e-06
YBR143C	4140.21	-0.46617	0.0941909	-4.9492	7.45189e-07	2.83513e-06
YML079W	1506.01	0.433192	0.0875856	4.94593	7.57826e-07	2.88156e-06
YDR279W	449.1	-0.744373	0.15052	-4.94535	7.60089e-07	2.88851e-06
YMR263W	389.793	-0.738642	0.149382	-4.94466	7.62785e-07	2.8971e-06
YAL018C	27.0318	1.54478	0.312808	4.93843	7.87528e-07	2.98937e-06
YPR052C	1195	-0.452839	0.0917504	-4.93555	7.99241e-07	3.03211e-06
YJL192C	1728.52	-0.709268	0.143728	-4.93479	8.02376e-07	3.04227e-06
YHR010W	22784.7	-0.683279	0.138521	-4.93266	8.11171e-07	3.07386e-06
YMR089C	1276.97	0.663759	0.134583	4.93195	8.14134e-07	3.08333e-06
YGL004C	949.481	0.535352	0.10859	4.93001	8.22264e-07	3.11235e-06
YBR146W	1458.03	0.460216	0.0933583	4.92957	8.24126e-07	3.11763e-06
YBL010C	158.198	-0.845204	0.171513	-4.92792	8.31111e-07	3.14227e-06
YHR193C	10288.9	-0.470782	0.0955533	-4.9269	8.35447e-07	3.15687e-06
YGL173C	2304.52	0.60482	0.12278	4.92603	8.39168e-07	3.16913e-06
YHL016C	163.977	-0.79109	0.160642	-4.92456	8.45487e-07	3.19119e-06
YER147C-A	894.212	-0.521789	0.105984	-4.92327	8.51113e-07	3.2106e-06
YGL013C	793.666	0.728188	0.147953	4.92176	8.57708e-07	3.23365e-06
YJR075W	892.532	-0.523826	0.106443	-4.92118	8.6022e-07	3.24128e-06
YDR287W	1111.24	0.45448	0.0924102	4.91808	8.73987e-07	3.29129e-06
YNR018W	1065.36	-0.539775	0.109757	-4.91792	8.74699e-07	3.29211e-06
YFR041C	979.937	-0.613292	0.124735	-4.91675	8.79945e-07	3.30998e-06
YDL212W	3599.57	-0.595065	0.121051	-4.91582	8.84097e-07	3.32373e-06
YLR393W	250.12	0.65773	0.133876	4.91298	8.9704e-07	3.37048e-06
YDR454C	3888.1	-0.520463	0.106073	-4.90663	9.26551e-07	3.4794e-06
YHR005C	948.364	-0.627337	0.127887	-4.90538	9.32459e-07	3.49961e-06
YBR230C	3332.86	0.518792	0.105773	4.90475	9.35465e-07	3.50891e-06
YGL192W	1090.72	0.50647	0.103299	4.90296	9.44048e-07	3.53912e-06
YLR453C	164.251	-0.740815	0.151119	-4.9022	9.4769e-07	3.54678e-06
YNR003C	711.1	-0.610278	0.124489	-4.90226	9.47389e-07	3.54678e-06
YPL198W	7314	-0.406164	0.0828516	-4.9023	9.47203e-07	3.54678e-06
YHR063C	983.668	-0.479608	0.0978682	-4.90055	9.55693e-07	3.57472e-06
YOR031W	582.021	0.711693	0.145256	4.89957	9.6046e-07	3.59053e-06
YGR137W	1271.82	0.477424	0.0974822	4.89756	9.70361e-07	3.62551e-06
YOR144C	152.775	-0.828713	0.169411	-4.89172	9.99593e-07	3.73264e-06
YEL027W	8503.81	-0.557693	0.114025	-4.89096	1.00347e-06	3.74455e-06
YMR033W	618.763	-0.484492	0.0990604	-4.89087	1.00391e-06	3.74455e-06
YHR023W	429.672	-0.58985	0.120692	-4.88721	1.02275e-06	3.81269e-06
YGR013W	839.342	0.461975	0.0946129	4.88279	1.04596e-06	3.89704e-06
YDR024W	75.1601	-1.01896	0.208701	-4.8824	1.04802e-06	3.90034e-06
YPL178W	1856.66	-0.572321	0.117221	-4.88243	1.04788e-06	3.90034e-06
YGL155W	737.118	-0.52788	0.108122	-4.88228	1.04867e-06	3.90057e-06
YEL006W	763.613	-0.493441	0.101086	-4.88139	1.05341e-06	3.91603e-06
YBR297W	623.276	0.787717	0.161389	4.88086	1.05626e-06	3.92444e-06
YLR193C	914.112	0.651675	0.133533	4.88024	1.05957e-06	3.93453e-06
YCL061C	324.024	-0.6721	0.137788	-4.87779	1.0728e-06	3.98145e-06
YDR345C	7944.5	0.753195	0.15442	4.87757	1.074e-06	3.98368e-06
YPL243W	1601.13	-0.507415	0.104081	-4.8752	1.08697e-06	4.02953e-06
YBL003C	3992.79	-1.9309	0.396172	-4.8739	1.09419e-06	4.05403e-06
YDR499W	262.288	-0.786004	0.161285	-4.87338	1.09704e-06	4.06007e-06
YNL035C	670.275	-0.522576	0.10723	-4.87342	1.09681e-06	4.06007e-06
YGL018C	333.926	0.647358	0.132955	4.86901	1.12157e-06	4.14856e-06
YPR074C	2787.29	-0.666461	0.136989	-4.86505	1.14426e-06	4.23014e-06
YGR038W	379.377	-0.629552	0.129466	-4.8627	1.15797e-06	4.27847e-06
YMR064W	847.57	0.486871	0.100134	4.86218	1.16101e-06	4.2873e-06
YAR018C	290.424	-0.668699	0.137567	-4.86091	1.16846e-06	4.31242e-06
YDL127W	244.491	-0.764395	0.157324	-4.85873	1.18142e-06	4.35784e-06
YGR158C	434.826	-0.559808	0.115363	-4.85258	1.21866e-06	4.49021e-06
YOR353C	585.089	0.514164	0.105956	4.85262	1.21842e-06	4.49021e-06
YNL126W	288.384	-0.650568	0.134172	-4.84877	1.2423e-06	4.57478e-06
YGL120C	653.065	-0.799795	0.164958	-4.84848	1.24409e-06	4.57884e-06
YNL312W	630.961	-0.660067	0.136265	-4.84398	1.27262e-06	4.68128e-06
YOR202W	6788.27	-0.392771	0.0810965	-4.84325	1.2773e-06	4.69591e-06
YLR146C	402.486	-0.623337	0.128735	-4.84202	1.28525e-06	4.7225e-06
YDL084W	4179.14	-0.383925	0.0792992	-4.84147	1.28884e-06	4.73309e-06
YLR025W	2472.81	0.403529	0.0833532	4.84119	1.29065e-06	4.73713e-06
YGR209C	4992.02	0.75101	0.155183	4.83951	1.30159e-06	4.77466e-06
YDR530C	1217.06	0.484439	0.100162	4.83654	1.32118e-06	4.84383e-06
YJL020W-A	264.252	0.707396	0.146286	4.83571	1.32669e-06	4.86135e-06
YIL154C	1602.16	0.439942	0.0910026	4.83439	1.33557e-06	4.89121e-06
YGR106C	4261.98	-0.542245	0.112182	-4.83363	1.34064e-06	4.90707e-06
YDR157W	116.823	-0.818205	0.169524	-4.82647	1.38972e-06	5.0826e-06
YNL067W	6230.13	-0.408529	0.0846443	-4.82642	1.39012e-06	5.0826e-06
YMR132C	325.459	-0.659226	0.136712	-4.82202	1.42112e-06	5.1931e-06
YLR060W	2885.4	-0.566005	0.11739	-4.82159	1.42415e-06	5.20132e-06
YNR027W	315.087	-0.580101	0.120332	-4.82083	1.42965e-06	5.21855e-06
YHR188C	1174.52	0.474209	0.0983715	4.8206	1.4313e-06	5.2217e-06
YJL125C	452.985	-0.571184	0.118498	-4.82021	1.43406e-06	5.22889e-06
YBL072C	34275.1	-0.476814	0.0989532	-4.81858	1.44581e-06	5.26887e-06
YLR309C	1147.65	0.548162	0.113845	4.81498	1.47218e-06	5.36201e-06
YNL119W	457.028	-0.649745	0.134953	-4.81461	1.47487e-06	5.36888e-06
YKL065C	6986.24	0.57359	0.119173	4.81309	1.48617e-06	5.40706e-06
YMR048W	293.515	-0.85798	0.178267	-4.8129	1.48752e-06	5.40903e-06
YLR079W	1804.53	-0.43183	0.0897722	-4.81029	1.50712e-06	5.47731e-06
YNL118C	2041.77	0.466796	0.0970849	4.80812	1.52353e-06	5.5339e-06
YJR120W	46.9154	1.20188	0.25006	4.80637	1.53699e-06	5.57976e-06
YLR198C	885.391	-0.584815	0.121785	-4.80204	1.57058e-06	5.69859e-06
YKL003C	601.221	0.551944	0.114946	4.80175	1.57283e-06	5.70367e-06
YNR053C	649.819	-0.625437	0.130275	-4.80091	1.57944e-06	5.72449e-06
YIL157C	1533.77	0.419	0.087325	4.79817	1.60125e-06	5.80041e-06
YLR362W	1064.69	0.466209	0.0972056	4.79611	1.61775e-06	5.85697e-06
YIL091C	325.775	-0.789163	0.164547	-4.79597	1.61887e-06	5.85786e-06
YLR287C-A	31135.5	-0.828061	0.172749	-4.79343	1.63958e-06	5.92955e-06
YJR061W	300.182	0.604998	0.126246	4.79221	1.64955e-06	5.96238e-06
YOL030W	3402.84	0.506753	0.105866	4.78676	1.69495e-06	6.12317e-06
YDR539W	766.945	0.515811	0.107765	4.78645	1.69756e-06	6.12925e-06
YMR240C	423.61	-0.569428	0.119004	-4.78496	1.71021e-06	6.17159e-06
YIL116W	2506.44	0.662328	0.138655	4.77682	1.78089e-06	6.42318e-06
YCR024C	416.975	0.536051	0.112241	4.77589	1.78917e-06	6.44953e-06
YGL038C	744.88	-0.545078	0.114176	-4.77401	1.80594e-06	6.50559e-06
YGR103W	3594.52	-0.520089	0.108944	-4.77393	1.80668e-06	6.50559e-06
YNL176C	1532.13	0.49677	0.104077	4.77308	1.81432e-06	6.5296e-06
YBR086C	2243.14	0.426678	0.0894175	4.77175	1.82632e-06	6.56923e-06
YPL127C	1200.21	-0.521669	0.109359	-4.77026	1.83988e-06	6.61441e-06
YLR215C	159.46	-0.834049	0.174962	-4.76704	1.86953e-06	6.7174e-06
YJL045W	126.16	0.916833	0.192467	4.76359	1.90179e-06	6.82963e-06
YER012W	2497.44	0.582694	0.122341	4.76288	1.90848e-06	6.84996e-06
YDR272W	2700.4	0.404596	0.0849571	4.76236	1.91344e-06	6.86406e-06
YIL042C	682.524	0.560116	0.117698	4.75891	1.94642e-06	6.9786e-06
YPR139C	1100.14	-0.601321	0.126361	-4.75875	1.94794e-06	6.98028e-06
YMR278W	737.645	0.477518	0.100444	4.75406	1.99369e-06	7.14038e-06
YER171W	517.8	-0.529039	0.111316	-4.7526	2.00818e-06	7.18815e-06
YGR001C	1429.18	-0.538431	0.113294	-4.7525	2.00918e-06	7.18815e-06
YKR090W	465.678	-0.596674	0.125587	-4.7511	2.02318e-06	7.23433e-06
YKL110C	422.937	-0.560988	0.118111	-4.74967	2.03745e-06	7.28144e-06
YDR151C	1309.75	0.660126	0.139035	4.74792	2.05518e-06	7.34088e-06
YNL080C	521.929	-0.526948	0.111076	-4.74405	2.09488e-06	7.47868e-06
YBR038W	211.568	-0.737541	0.155633	-4.73898	2.14792e-06	7.66391e-06
YMR032W	259.578	-0.652375	0.137916	-4.73023	2.24269e-06	7.99775e-06
YLR325C	19645.1	-0.781505	0.16524	-4.72951	2.25057e-06	8.02157e-06
YNL100W	2498.51	0.516336	0.109192	4.72872	2.25938e-06	8.04866e-06
YLR242C	135.777	-0.900428	0.1907	-4.72169	2.33889e-06	8.32743e-06
YOR062C	844.472	-0.452856	0.0959258	-4.7209	2.34803e-06	8.35554e-06
YLR168C	1054.71	0.661275	0.140243	4.71522	2.41451e-06	8.5875e-06
YER136W	3599.09	0.387029	0.0821217	4.71287	2.4425e-06	8.68241e-06
YIR006C	2340.15	0.576118	0.122249	4.71266	2.4451e-06	8.68701e-06
YML007W	2554.83	0.616064	0.130731	4.71244	2.44763e-06	8.69138e-06
YOR281C	1017.93	-0.454118	0.0963855	-4.71148	2.45926e-06	8.72801e-06
YDL001W	309.562	-0.603415	0.128219	-4.70614	2.52447e-06	8.95469e-06
YML082W	200.879	-0.682921	0.145125	-4.70573	2.52954e-06	8.96312e-06
YNR012W	404.191	-0.572866	0.121735	-4.70583	2.52834e-06	8.96312e-06
YGR101W	753.542	0.558955	0.118807	4.70472	2.54215e-06	9.00301e-06
YIL047C-A	110.873	-0.856681	0.18217	-4.70264	2.56824e-06	9.09055e-06
YJR016C	2841	-0.564612	0.120092	-4.70148	2.58281e-06	9.13728e-06
YBR221C	4246.68	0.523512	0.111381	4.70019	2.59922e-06	9.19043e-06
YPL170W	1269.55	0.668527	0.142244	4.69986	2.60335e-06	9.20016e-06
YGL099W	441.198	-0.732696	0.156049	-4.69531	2.66203e-06	9.40255e-06
YKR048C	4583.88	0.40941	0.087221	4.69394	2.67987e-06	9.46053e-06
YIR002C	966.521	0.52797	0.112573	4.69004	2.73155e-06	9.63786e-06
YDR405W	911.41	0.620847	0.132563	4.68342	2.82132e-06	9.94935e-06
YCL034W	1834.23	0.461653	0.098601	4.68204	2.84039e-06	1.00113e-05
YHL010C	363.379	0.545004	0.116431	4.68092	2.85588e-06	1.00605e-05
YFR001W	1959.51	-0.593439	0.126818	-4.67945	2.87648e-06	1.01278e-05
YLR292C	561.937	-0.527713	0.112869	-4.67543	2.93337e-06	1.03226e-05
YML048W	3138.43	0.445307	0.0952469	4.6753	2.93529e-06	1.03239e-05
YDR485C	1130.72	0.531975	0.113808	4.67434	2.94906e-06	1.03669e-05
YDR394W	3087.93	0.522012	0.111718	4.67256	2.97465e-06	1.04513e-05
YKL105C	977.47	0.46445	0.099569	4.6646	3.09213e-06	1.08583e-05
YDR002W	5324.2	-0.532416	0.114176	-4.66311	3.11468e-06	1.09318e-05
YJL048C	4501.08	0.727946	0.156152	4.66177	3.13494e-06	1.09971e-05
YPL279C	71.8672	-0.949376	0.203664	-4.66149	3.13929e-06	1.10065e-05
YMR257C	314.235	0.715623	0.153685	4.65643	3.21739e-06	1.12723e-05
YNL175C	1056.75	-0.70281	0.150935	-4.65636	3.21848e-06	1.12723e-05
YMR138W	406.134	-0.569486	0.12232	-4.65571	3.22873e-06	1.13023e-05
YLR220W	1170.04	-0.411335	0.0884149	-4.65233	3.28204e-06	1.14828e-05
YLL056C	158.89	0.876874	0.188525	4.65124	3.2994e-06	1.15375e-05
YPL255W	91.9315	-0.886515	0.190605	-4.65106	3.30241e-06	1.1542e-05
YDL160C	1568.42	0.455259	0.0979397	4.64836	3.34582e-06	1.16875e-05
YER101C	446.234	0.500042	0.107603	4.64708	3.3666e-06	1.1754e-05
YPL210C	1370.71	-0.515438	0.110924	-4.64677	3.37175e-06	1.17658e-05
YHR214W-A	114.8	0.884214	0.190375	4.6446	3.40729e-06	1.18836e-05
YBL106C	288.109	0.562984	0.121234	4.6438	3.42058e-06	1.19237e-05
YER102W	27077.8	-0.410489	0.0885249	-4.63699	3.53515e-06	1.23166e-05
YCR015C	359.278	-0.578639	0.124822	-4.63571	3.5571e-06	1.23866e-05
YGL215W	2718.25	0.631013	0.136128	4.63543	3.56189e-06	1.23968e-05
YDR054C	2295.94	0.410511	0.0886216	4.63218	3.61831e-06	1.25866e-05
YDR395W	960.14	-0.567826	0.122638	-4.63009	3.65502e-06	1.2701e-05
YOR187W	4703.78	0.555109	0.11989	4.63017	3.65365e-06	1.2701e-05
YHR039C	1345.51	-0.448933	0.0969884	-4.62873	3.67924e-06	1.27785e-05
YJR078W	172.266	0.768934	0.166142	4.62817	3.68911e-06	1.28061e-05
YIL148W	28079.1	-0.511154	0.110449	-4.62796	3.69279e-06	1.28122e-05
YBR155W	239.759	-0.622207	0.134502	-4.62601	3.7277e-06	1.29266e-05
YJL001W	2653.8	0.503912	0.108939	4.62562	3.73473e-06	1.29442e-05
YDL036C	554.277	-0.48676	0.105248	-4.62487	3.74833e-06	1.29846e-05
YML104C	261.721	-0.610319	0.132098	-4.62021	3.83345e-06	1.32726e-05
YNR034W	695.472	0.635725	0.13774	4.61541	3.92323e-06	1.35763e-05
YOL022C	1218.63	-0.473338	0.102577	-4.61449	3.94068e-06	1.36296e-05
YGR184C	1055.46	0.513212	0.111317	4.61038	4.01933e-06	1.38944e-05
YDL009C	302.476	-0.794091	0.172251	-4.61008	4.02511e-06	1.39072e-05
YEL028W	76.702	-0.924987	0.20068	-4.60926	4.04113e-06	1.39553e-05
YGR026W	1404.92	-0.493674	0.107152	-4.60723	4.08072e-06	1.40847e-05
YMR182C	296.59	0.604743	0.131379	4.60303	4.16391e-06	1.43644e-05
YHL013C	522.751	-0.658029	0.142966	-4.6027	4.17057e-06	1.43725e-05
YNL077W	1090.25	0.688038	0.149484	4.60275	4.16951e-06	1.43725e-05
YML025C	667.824	0.485547	0.105494	4.60259	4.17277e-06	1.43726e-05
YCR093W	1354.35	0.543481	0.118175	4.59895	4.24634e-06	1.46185e-05
YDR513W	5917.9	0.651529	0.141695	4.59812	4.26318e-06	1.46689e-05
YOR079C	204.107	-0.692766	0.150669	-4.59792	4.26739e-06	1.46758e-05
YPL258C	161.216	0.743461	0.161739	4.59668	4.29272e-06	1.47553e-05
YOR061W	1733.19	-0.475083	0.103364	-4.59623	4.30211e-06	1.47799e-05
YNL313C	270.041	-0.648875	0.141182	-4.596	4.30669e-06	1.4788e-05
YJL173C	725.29	-0.835455	0.181961	-4.59139	4.40305e-06	1.51111e-05
YAL023C	1001.41	-0.491499	0.10707	-4.59042	4.42348e-06	1.51734e-05
YBR164C	1347.81	-0.656144	0.142953	-4.58993	4.43385e-06	1.51933e-05
YJR074W	560.093	-0.82879	0.180564	-4.59	4.43249e-06	1.51933e-05
YLL033W	191.077	-0.634098	0.138177	-4.58903	4.45303e-06	1.52512e-05
YDR467C	183.382	0.676994	0.14757	4.58761	4.48339e-06	1.53472e-05
YDR124W	179.988	0.74619	0.162688	4.58663	4.50455e-06	1.54038e-05
YOR256C	901.009	0.496463	0.108241	4.58666	4.50402e-06	1.54038e-05
YKR011C	1192.97	0.489116	0.106654	4.58602	4.51773e-06	1.5441e-05
YCL051W	873.581	0.429351	0.0936276	4.58573	4.52398e-06	1.54544e-05
YPL183C	380.994	-0.632554	0.137999	-4.58374	4.5673e-06	1.55944e-05
YOL058W	4614.2	-0.666407	0.14549	-4.58045	4.63984e-06	1.58339e-05
YGL030W	21415.3	-0.415013	0.0906612	-4.57763	4.70282e-06	1.60407e-05
YKL119C	682.865	-0.572044	0.12497	-4.57744	4.70707e-06	1.6047e-05
YNL321W	635.121	0.469095	0.102521	4.57559	4.74883e-06	1.6181e-05
YPL038W	234.651	-0.816203	0.178459	-4.57361	4.79381e-06	1.63259e-05
YOR389W	230.948	0.666432	0.145727	4.57314	4.80461e-06	1.63543e-05
YDR500C	22605.6	-0.69366	0.151688	-4.57294	4.80937e-06	1.63622e-05
YDR517W	1852.67	0.405091	0.0885922	4.57253	4.81869e-06	1.63855e-05
YER068W	712.504	-0.522675	0.114342	-4.57114	4.8508e-06	1.64863e-05
YAL048C	441.708	0.612797	0.134091	4.57001	4.87696e-06	1.65667e-05
YGR125W	705.725	-0.462094	0.101155	-4.56817	4.92003e-06	1.67045e-05
YJL131C	522.96	0.491754	0.107723	4.56498	4.9955e-06	1.69521e-05
YBR249C	11013.6	0.564761	0.123726	4.5646	5.00441e-06	1.69737e-05
YCR089W	352.759	0.573691	0.125686	4.56447	5.00752e-06	1.69756e-05
YHR029C	1878.8	0.806317	0.176733	4.56234	5.05866e-06	1.71402e-05
YIL036W	1812.1	0.436216	0.0956196	4.56199	5.06705e-06	1.71599e-05
YPL014W	372.829	-0.583788	0.127979	-4.56159	5.07678e-06	1.71841e-05
YIL026C	505.741	-0.704922	0.15454	-4.56141	5.08114e-06	1.71902e-05
YLR353W	146.235	-0.714049	0.156587	-4.56008	5.11351e-06	1.72909e-05
YDR052C	576.718	-0.654489	0.143533	-4.55987	5.11864e-06	1.72994e-05
YGL256W	666.765	-0.740822	0.162562	-4.55716	5.18505e-06	1.75061e-05
YMR135W-A	147.073	0.776348	0.170356	4.55722	5.18354e-06	1.75061e-05
YKL074C	424.681	-0.505486	0.11094	-4.55641	5.2035e-06	1.7552e-05
YNR021W	2107.91	-0.480346	0.105422	-4.55639	5.20392e-06	1.7552e-05
YPL277C	124.499	0.760942	0.16713	4.55301	5.28842e-06	1.7828e-05
YBR028C	234.976	-0.587565	0.129068	-4.55237	5.30448e-06	1.78731e-05
YGL257C	872.867	-0.450821	0.0991617	-4.54632	5.45923e-06	1.83852e-05
YGR044C	1504.09	-0.525489	0.115627	-4.5447	5.50142e-06	1.85179e-05
YDL070W	3561.56	0.570208	0.125507	4.54323	5.53979e-06	1.86377e-05
YOR390W	88.2674	-0.864583	0.190398	-4.54092	5.60104e-06	1.88342e-05
YGL161C	2028.34	0.414875	0.0913731	4.54045	5.61339e-06	1.88662e-05
YGL129C	815.563	0.447843	0.0986506	4.53969	5.63367e-06	1.89248e-05
YMR041C	684.02	0.47645	0.10507	4.53461	5.77095e-06	1.93762e-05
YLR437C-A	230.724	0.658446	0.145225	4.53397	5.78853e-06	1.94254e-05
YER021W	4330.89	0.47181	0.104071	4.53352	5.80088e-06	1.94571e-05
YOR161W-B	302.472	0.629731	0.138915	4.53321	5.80933e-06	1.94756e-05
YDR443C	482.385	0.514735	0.113651	4.52908	5.924e-06	1.985e-05
YGR087C	64.4823	0.934833	0.206503	4.52698	5.98336e-06	2.00388e-05
YMR059W	457.52	-0.786507	0.173852	-4.524	6.06818e-06	2.03127e-05
YDR296W	932.693	0.47601	0.105245	4.52286	6.10091e-06	2.0412e-05
YDL061C	10956.4	-0.488701	0.108063	-4.52239	6.11461e-06	2.04476e-05
YHR134W	531.111	-0.598505	0.132355	-4.52196	6.12704e-06	2.04788e-05
YBR256C	6015.99	0.634209	0.140285	4.52087	6.1585e-06	2.05736e-05
YNL102W	207.101	-0.870939	0.192885	-4.51533	6.32187e-06	2.11088e-05
YMR235C	1481.02	-0.44091	0.0976915	-4.51329	6.38292e-06	2.1302e-05
YLR147C	530.895	-0.512191	0.113542	-4.51102	6.45165e-06	2.15206e-05
YKL064W	2272.56	0.433338	0.0960703	4.51063	6.46343e-06	2.15491e-05
YPL100W	1110.64	0.408748	0.090646	4.50928	6.50494e-06	2.16766e-05
[truncated: 4,660 more rows]

## Sheet: CUR_vs_DMSO
	baseMean	log2FoldChange	lfcSE	stat	pvalue	padj
[truncated: 6,663 more rows]
