# Supplementary material for: Acetylation-Specific Interference by Anti-Histone H3K9ac Intrabody Results in Precise Modulation of Gene Expression
Source: Int J Mol Sci. 2022 Aug 10;23(16):8892. doi: 10.3390/ijms23168892 (PMC9408029; doi:10.3390/ijms23168892)
Supplement: Supplementary file 1 [file ijms-23-08892-s001.zip › Dataset S2.xlsx]

## Sheet: 58F_sig05_FC1.5_89genes
gene_name	ensembl_id	baseMean	log2FoldChange	lfcSE	stat	pvalue	padj	sgd_id	SwissProt_entry	uniprot
#N/A	YIR042C	281.779	-1.65958	0.11362	-14.6065	0	0	S000001481;	YIW2_YEAST	P40586
URA7	YBL039C	571.755	-0.977931	0.0894708	-10.9302	0	0	S000000135;	URA7_YEAST	P28274
MAK16	YAL025C	358.705	-0.951646	0.106505	-8.93521	0	0	S000000023;	MAK16_YEAST	P10962
ELO2	YCR034W	608.836	-0.853174	0.0940718	-9.06939	0	0	S000000630;	ELO2_YEAST	P25358
PCL1	YNL289W	47.693	-0.848833	0.199473	-4.25538	2.08692e-05	0.000113739	S000005233;	PCL1_YEAST	P24867
#N/A	YDR183C-A	36.2442	-0.84352	0.207514	-4.06487	4.80589e-05	0.000246399	S000028540;	YD83A_YEAST	P0C5M3
NOG1	YPL093W	667.571	-0.809895	0.0864451	-9.36889	0	0	S000006014;	NOG1_YEAST	Q02892
BRE5	YNR051C	459.203	-0.793721	0.0928593	-8.54757	0	0	S000005334;	BRE5_YEAST	P53741
SQT1	YIR012W	457.391	-0.789941	0.098141	-8.04905	0	0	S000001451;	SQT1_YEAST	P35184
TKL1	YPR074C	2706.38	-0.772647	0.0686975	-11.2471	0	0	S000006278;	TKT1_YEAST	P23254
RPA49	YNL248C	606.776	-0.770024	0.0966725	-7.96529	0	0	S000005192;	RPA49_YEAST	Q01080
#N/A	YGR079W	38.4164	-0.765146	0.204387	-3.74361	0.000181397	0.00080166	S000003311;	YG2G_YEAST	P53249
RPA34	YJL148W	656.43	-0.763106	0.098713	-7.73055	0	0	S000003684;	RPA34_YEAST	P47006
BUD8	YLR353W	142.459	-0.750333	0.139525	-5.37777	7.54155e-08	6.63497e-07	S000004345;	BUD8_YEAST	P41698
#N/A	YBR238C	160.043	-0.750028	0.13505	-5.55371	2.79665e-08	2.67996e-07	S000000442;	RMD9L_YEAST	P38330
ELO3	YLR372W	1177.99	-0.729994	0.0802222	-9.09966	0	0	S000004364;	ELO3_YEAST	P40319
BUD22	YMR014W	304.737	-0.70995	0.108004	-6.57335	0	7.56664e-10	S000004616;	BUD22_YEAST	Q04347
RRP12	YPL012W	328.536	-0.70878	0.10604	-6.68406	0	3.77539e-10	S000005933;	RRP12_YEAST	Q12754
RPC19	YNL113W	300.443	-0.698976	0.107312	-6.51351	0	1.09627e-09	S000005057;	RPAC2_YEAST	P28000
#N/A	YNL114C	238.121	-0.697203	0.116399	-5.98978	2.10125e-09	2.48568e-08	S000005058;	YNL4_YEAST	P53926
RPC82	YPR190C	217.341	-0.684503	0.124576	-5.49468	3.91427e-08	3.63585e-07	S000006394;	RPC3_YEAST	P32349
DBP6	YNR038W	235.402	-0.681739	0.116494	-5.85211	4.85372e-09	5.26703e-08	S000005321;	DBP6_YEAST	P53734
AIM20	YIL158W	337.471	-0.680049	0.10098	-6.7345	0	2.71847e-10	S000001420;	AIM20_YEAST	P40451
RPF2	YKR081C	1141.44	-0.677319	0.0751263	-9.01574	0	0	S000001789;	RPF2_YEAST	P36160
#N/A	YPL245W	196.907	-0.676297	0.121572	-5.56295	2.65259e-08	2.54557e-07	S000006166;	YP245_YEAST	Q12179
HAS1	YMR290C	900.067	-0.664252	0.0836873	-7.93731	0	0	S000004903;	HAS1_YEAST	Q03532
GRC3	YLL035W	103.053	-0.662126	0.15383	-4.30427	1.67535e-05	9.32931e-05	S000003958;	GRC3_YEAST	Q07845
REX4	YOL080C	123.108	-0.652186	0.150794	-4.325	1.52531e-05	8.56541e-05	S000005440;	REXO4_YEAST	Q08237
ERG11	YHR007C	1855.67	-0.650055	0.0898265	-7.23678	0	0	S000001049;	CP51_YEAST	P10614
SOF1	YLL011W	343.456	-0.645493	0.104965	-6.1496	7.76768e-10	9.87266e-09	S000003934;	DCA13_YEAST	P33750
MMT1	YMR177W	167.581	-0.645326	0.131039	-4.9247	8.44912e-07	6.13644e-06	S000004789;	MMT1_YEAST	Q03218
TSC10	YBR265W	365.913	-0.644376	0.0979705	-6.57725	0	7.40539e-10	S000000469;	TSC10_YEAST	P38342
KAP123	YER110C	892.788	-0.642575	0.0825528	-7.78381	0	0	S000000912;	IMB4_YEAST	P40069
SYO1	YDL063C	279.438	-0.639743	0.111959	-5.7141	1.10289e-08	1.13353e-07	S000002221;	SYO1_YEAST	Q07395
SPB1	YCL054W	299.827	-0.639244	0.117382	-5.44582	5.15666e-08	4.66622e-07	S000000559;	SPB1_YEAST	P25582
#N/A	YOR309C	485.665	-0.63708	0.107382	-5.93282	2.9778e-09	3.39012e-08	S000005836;	YO309_YEAST	Q12444
NOP58	YOR310C	1885.86	-0.6325	0.0763719	-8.28184	0	0	S000005837;	NOP58_YEAST	Q12499
PWP1	YLR196W	667.353	-0.622896	0.0871628	-7.14635	0	0	S000004186;	PWP1_YEAST	P21304
TSR2	YLR435W	235.363	-0.621906	0.117315	-5.30117	1.15064e-07	9.74969e-07	S000004427;	TSR2_YEAST	Q06672
SST2	YLR452C	261.645	-0.619787	0.110334	-5.61736	1.93897e-08	1.91028e-07	S000004444;	SST2_YEAST	P11972
UTP14	YML093W	620.749	-0.618059	0.100752	-6.13447	8.54429e-10	1.07775e-08	S000004558;	UTP14_YEAST	Q04500
HPT1	YDR399W	629.859	-0.614695	0.0861207	-7.1376	0	0	S000002807;	HPRT_YEAST	Q04178
IMD4	YML056C	1228.97	-0.613917	0.0767566	-7.99823	0	0	S000004520;	IMDH4_YEAST	P50094
GAS1	YMR307W	5628.14	-0.606636	0.0626569	-9.68187	0	0	S000004924;	GAS1_YEAST	P22146
#N/A	YKL053W	91.2651	-0.605785	0.158397	-3.82448	0.000131046	0.000594933	S000001536;	YKF3_YEAST	P35733
DRS1	YLL008W	965.586	-0.602329	0.0846037	-7.11942	0	0	S000003931;	DRS1_YEAST	P32892
PUS1	YPL212C	392.4	-0.601227	0.0987476	-6.08852	1.13959e-09	1.40549e-08	S000006133;	PUS1_YEAST	Q12211
RRP36	YOR287C	150.24	-0.596863	0.139624	-4.2748	1.91308e-05	0.000105038	S000005813;	RRP36_YEAST	Q12481
ARX1	YDR101C	495.994	-0.596832	0.0940562	-6.34548	2.21731e-10	3.10237e-09	S000002508;	ARX1_YEAST	Q03862
DPH2	YKL191W	571.451	-0.596269	0.0949139	-6.28221	3.33801e-10	4.47307e-09	S000001674;	DPH2_YEAST	P32461
SYG1	YIL047C	459.907	-0.592406	0.0911443	-6.49966	0	1.19145e-09	S000001309;	SYG1_YEAST	P40528
NAF1	YNL124W	241.523	-0.591904	0.11784	-5.02296	5.08811e-07	3.85954e-06	S000005068;	NAF1_YEAST	P53919
MAK21	YDR060W	1078.72	-0.590484	0.0812456	-7.26789	0	0	S000002467;	MAK21_YEAST	Q12176
FUN30	YAL019W	215.371	-0.589206	0.122187	-4.82216	1.4201e-06	9.97665e-06	S000000017;	FUN30_YEAST	P31380
CBF2	YGR140W	345.173	-0.588382	0.098187	-5.99247	2.06684e-09	2.44931e-08	S000003372;	CBF3A_YEAST	P32504
SAP185	YJL098W	439.06	-0.588295	0.0947542	-6.20864	5.34464e-10	7.02076e-09	S000003634;	SA185_YEAST	P40856
ERO1	YML130C	633.835	-0.587521	0.0851026	-6.90368	0	0	S000004599;	ERO1_YEAST	Q03103
SHB17	YKR043C	1190.04	-0.58725	0.0725894	-8.09002	0	0	S000001751;	SHB17_YEAST	P36136
URA10	YMR271C	963.959	0.588138	0.0777695	7.56258	0	0	S000004884;	PYRX_YEAST	P30402
FMP23	YBR047W	470.799	0.594554	0.0998531	5.95428	2.61213e-09	3.02028e-08	S000000251;	FMP23_YEAST	P38231
BNA1	YJR025C	2387.34	0.596836	0.0605879	9.85075	0	0	S000003786;	3HAO_YEAST	P47096
GSP2	YOR185C	1129.86	0.600406	0.0961892	6.24193	4.32211e-10	5.73411e-09	S000005711;	GSP2_YEAST	P32836
AIM19	YIL087C	995.669	0.604357	0.0776087	7.78722	0	0	S000001349;	AIM19_YEAST	P40502
HXK1	YFR053C	32441.1	0.606779	0.067766	8.95403	0	0	S000001949;	HXKA_YEAST	P04806
TFS1	YLR178C	3010.28	0.607851	0.154546	3.93314	8.38418e-05	0.000401717	S000004168;	CPYI_YEAST	P14306
RRD2	YPL152W	744.609	0.612493	0.0787522	7.77746	0	0	S000006073;	PTPA2_YEAST	Q12461
UGX2	YDL169C	1084.55	0.622303	0.0820538	7.58409	0	0	S000002328;	UGX2_YEAST	P32772
CYC7	YEL039C	10467.8	0.622958	0.0779941	7.98725	0	0	S000000765;	CYC7_YEAST	P00045
ECM15	YBL001C	3795.78	0.623289	0.0635106	9.81394	0	0	S000000097;	ECM15_YEAST	P35195
GPM2	YDL021W	705.521	0.625131	0.0831716	7.51616	0	0	S000002179;	PMG2_YEAST	Q12008
HOR7	YMR251W-A	18479.1	0.626605	0.0825123	7.59408	0	0	S000004864;	HOR7_YEAST	Q05827
WIP1	YDR374W-A	576.969	0.626706	0.0868436	7.21649	0	0	S000113553;	CENPW_YEAST	Q2V2P8
GPX1	YKL026C	1116.73	0.634492	0.0761577	8.33128	0	0	S000001509;	GPX1_YEAST	P36014
COX13	YGL191W	6932.24	0.634814	0.0630941	10.0614	0	0	S000003159;	COX13_YEAST	P32799
STF1	YDL130W-A	2131.26	0.643174	0.0839988	7.65694	0	0	S000007232;	STF1_YEAST	P01098
SDH8	YBR269C	1579.06	0.662808	0.0675541	9.81151	0	0	S000000473;	SDHF4_YEAST	P38345
COX12	YLR038C	4113.61	0.664107	0.0675532	9.83088	0	0	S000004028;	COX12_YEAST	Q01519
ALG13	YGL047W	912.971	0.665264	0.0813695	8.17584	0	0	S000003015;	ALG13_YEAST	P53178
MXR2	YCL033C	1184.48	0.679548	0.0768586	8.84153	0	0	S000000538;	MXR2_YEAST	P25566
NQM1	YGR043C	940.009	0.691198	0.0777789	8.88671	0	0	S000003275;	TAL2_YEAST	P53228
RTC3	YHR087W	3996.59	0.6925	0.062655	11.0526	0	0	S000001129;	SDO1L_YEAST	P38804
ATG8	YBL078C	2105.8	0.717351	0.0638316	11.2382	0	0	S000000174;	ATG8_YEAST	P38182
GCV1	YDR019C	227.117	0.739618	0.117391	6.30046	2.96771e-10	4.02544e-09	S000002426;	GCST_YEAST	P48015
TMA10	YLR327C	47451.7	0.746316	0.0749814	9.95335	0	0	S000004319;	TMA10_YEAST	Q06177
COX7	YMR256C	2464.5	0.748335	0.0739244	10.123	0	0	S000004869;	COX7_YEAST	P10174
PBI2	YNL015W	2174.78	0.78168	0.0714734	10.9367	0	0	S000004960;	IPB2_YEAST	P0CT04
SNZ1	YMR096W	2049.37	0.790564	0.0658409	12.0072	0	0	S000004702;	SNZ1_YEAST	Q03148
SPG1	YGR236C	502.595	0.955625	0.104365	9.15654	0	0	S000003468;	SPG1_YEAST	P50088
EGO4	YNR034W-A	8029.48	1.06726	0.0761918	14.0075	0	0	S000007525;	YN034_YEAST	Q3E841

## Sheet: CPTH2_sig05_FC1.5_1472genes
gene_name	ensembl_id	baseMean	log2FoldChange	lfcSE	stat	pvalue	padj	sgd_id	SwissProt_entry	uniprot
SSA3	YBL075C	2360.85	4.20548	0.190301	22.0991	0	0	S000000171	HSP73_YEAST	P09435
TIP1	YBR067C	2116.48	2.48016	0.12585	19.7073	0	0	S000000271	TIP1_YEAST	P27654
NQM1	YGR043C	1823.1	2.01475	0.103339	19.4965	0	0	S000003275	TAL2_YEAST	P53228
GCY1	YOR120W	6155.24	2.03212	0.108247	18.7729	0	0	S000005646	GCY1_YEAST	P14065
RTN2	YDL204W	4995.66	1.80401	0.0965508	18.6846	0	0	S000002363	RTN2_YEAST	Q12443
FIT2	YOR382W	583.775	2.32977	0.12721	18.3144	0	0	S000005909	FIT2_YEAST	Q08906
#N/A	YPR160C-A	1951.19	1.5744	0.0865615	18.1882	0	0	S000028726	YP160_YEAST	Q8TGK8
FMP45	YDL222C	1893.95	2.63059	0.147297	17.8591	0	0	S000002381	FMP45_YEAST	Q07651
GPH1	YPR160W	13109.4	1.57464	0.0890611	17.6804	0	0	S000006364	PHSG_YEAST	P06738
OM45	YIL136W	13306.1	1.65206	0.0950163	17.3871	0	0	S000001398	OM45_YEAST	P16547
SPG1	YGR236C	1209.91	2.57503	0.151349	17.0139	0	0	S000003468	SPG1_YEAST	P50088
ALD3	YMR169C	1526.34	1.8963	0.112732	16.8213	0	0	S000004779	ALDH3_YEAST	P54114
PDR15	YDR406W	2949.34	3.14903	0.187295	16.8132	0	0	S000002814	PDR15_YEAST	Q04182
DSE2	YHR143W	808.636	-2.13336	0.128519	-16.5996	0	0	S000001186	DSE2_YEAST	P38844
MSC1	YML128C	12906	1.60799	0.0980759	16.3954	0	0	S000004597	MSC1_YEAST	Q03104
GND2	YGR256W	571.426	2.69044	0.168352	15.981	0	0	S000003488	6PGD2_YEAST	P53319
#N/A	YOL150C	1150.57	3.27988	0.207081	15.8387	0	0	S000005510	YO150_YEAST	Q08293
GDB1	YPR184W	6280.35	2.04352	0.129681	15.7581	0	0	S000006388	GDE_YEAST	Q06625
GOR1	YNL274C	3331.58	1.53517	0.100168	15.3259	0	0	S000005218	GOR1_YEAST	P53839
#N/A	YCR102C	989.902	2.11618	0.138512	15.278	0	0	S000000699	YCZ2_YEAST	P25608
SIP18	YMR175W	362.513	2.46835	0.161953	15.2411	0	0	S000004787	SIP18_YEAST	P50263
AQY3	YFL054C	2498.14	1.54316	0.10187	15.1483	0	0	S000001840	AQY3_YEAST	P43549
HBT1	YDL223C	2460.26	2.60434	0.172319	15.1134	0	0	S000002382	HBT1_YEAST	Q07653
HXT5	YHR096C	3003.74	2.05086	0.136658	15.0073	0	0	S000001138	HXT5_YEAST	P38695
#N/A	YNL195C	3670.3	2.77611	0.185693	14.95	0	0	S000005139	YNT5_YEAST	P40168
DCS2	YOR173W	3409.77	1.48566	0.100594	14.7689	0	0	S000005699	DCS2_YEAST	Q12123
RTC3	YHR087W	7724.49	1.98576	0.135205	14.6871	0	0	S000001129	SDO1L_YEAST	P38804
GRE3	YHR104W	3590.58	1.68057	0.118074	14.2332	0	0	S000001146	GRE3_YEAST	P38715
TFS1	YLR178C	4747.71	1.62362	0.114425	14.1893	0	0	S000004168	CPYI_YEAST	P14306
#N/A	YGR035C	485.99	2.99986	0.212632	14.1082	0	0	S000003267	YG1O_YEAST	P53222
HXK1	YFR053C	70634.9	2.11736	0.151437	13.9818	0	0	S000001949	HXKA_YEAST	P04806
SNQ2	YDR011W	3777.15	2.80663	0.200925	13.9685	0	0	S000002418	SNQ2_YEAST	P32568
YOR1	YGR281W	2296.72	2.61826	0.189932	13.7852	0	0	S000003513	YOR1_YEAST	P53049
#N/A	YDR034W-B	1170.7	1.55892	0.113169	13.7751	0	0	S000007234	YD34B_YEAST	Q6Q5X2
AIM17	YHL021C	15825.7	1.00609	0.0732202	13.7406	0	0	S000001013	AIM17_YEAST	P23180
GUT1	YHL032C	2075	1.59028	0.115761	13.7376	0	0	S000001024	GLPK_YEAST	P32190
ATG36	YJL185C	797.962	1.64431	0.119706	13.7362	0	0	S000003721	ATG36_YEAST	P46983
NNR1	YNL200C	1399.44	1.46516	0.107061	13.6853	0	0	S000005144	NNRE_YEAST	P40165
KIN82	YCR091W	1484.22	1.4794	0.108775	13.6006	0	0	S000000687	KIN82_YEAST	P25341
SIT1	YEL065W	230.527	1.99659	0.147001	13.5821	0	0	S000000791	SIT1_YEAST	P39980
#N/A	YMR103C	772.686	1.44861	0.107153	13.5191	0	0	S000004709	YMZ3_YEAST	Q04436
AMS1	YGL156W	1631.17	1.54778	0.114594	13.5066	0	0	S000003124	MAN1_YEAST	P22855
GAD1	YMR250W	4616.39	1.32744	0.0982949	13.5047	0	0	S000004862	DCE_YEAST	Q04792
FIT3	YOR383C	550.623	1.6647	0.123343	13.4965	0	0	S000005910	FIT3_YEAST	Q08907
#N/A	YPR123C	207.267	2.40556	0.178526	13.4745	0	0	S000006327	YP123_YEAST	O13566
GTT2	YLL060C	606.968	2.27845	0.170542	13.36	0	0	S000003983	GST2_YEAST	Q12390
#N/A	YFR052C-A	6840.01	2.06034	0.154612	13.3259	0	0	S000028768	YF052_YEAST	A0A023PZH4
OPT2	YPR194C	553.384	-1.99894	0.15092	-13.2451	0	0	S000006398	OPT2_YEAST	Q06593
#N/A	YCL048W-A	226.591	1.9628	0.148309	13.2345	0	0	S000087203	YC048_YEAST	Q2V2Q2
HSP12	YFL014W	31774.9	2.20233	0.167042	13.1843	0	0	S000001880	HSP12_YEAST	P22943
DSF1	YEL070W	668.502	1.74312	0.134329	12.9765	0	0	S000000796	DSF1_YEAST	P0CX08
CTR1	YPR124W	710.627	1.51687	0.117725	12.8849	0	0	S000006328	CTR1_YEAST	P49573
MRT4	YKL009W	1256.52	-1.76761	0.138833	-12.732	0	0	S000001492	MRT4_YEAST	P33201
JEN1	YKL217W	13280.5	1.93439	0.152909	12.6506	0	0	S000001700	JEN1_YEAST	P36035
#N/A	YNL194C	7235.76	1.62508	0.129759	12.5238	0	0	S000005138	YNT4_YEAST	P40169
HO	YDL227C	92.1892	-2.94469	0.237735	-12.3865	0	0	S000002386	HO_YEAST	P09932
#N/A	YBR241C	1001.29	1.28681	0.104553	12.3078	0	0	S000000445	YB91_YEAST	P38142
ALD2	YMR170C	1043.95	1.14526	0.0936769	12.2256	0	0	S000004780	ALDH2_YEAST	P47771
MOH1	YBL049W	574.313	1.31517	0.108313	12.1423	0	0	S000000145	MOH1_YEAST	P38191
#N/A	YLR149C	3467.81	1.13111	0.0952964	11.8693	0	0	S000004139	YL149_YEAST	Q99296
ECM4	YKR076W	1533.97	1.63974	0.138286	11.8576	0	0	S000001784	GTO2_YEAST	P36156
PGM2	YMR105C	10426.3	1.20302	0.101929	11.8026	0	0	S000004711	PGM2_YEAST	P37012
#N/A	YJR096W	2816.59	1.04967	0.0891787	11.7705	0	0	S000003857	YJ66_YEAST	P47137
SOL4	YGR248W	2376.07	1.51696	0.129046	11.7552	0	0	S000003480	SOL4_YEAST	P53315
ATG34	YOL083W	1078.02	1.10343	0.0940522	11.7321	0	0	S000005443	ATG34_YEAST	Q12292
ARN2	YHL047C	500.869	1.49589	0.12807	11.6803	0	0	S000001039	ARN2_YEAST	P38724
CTT1	YGR088W	6031.36	1.68775	0.144831	11.6532	0	0	S000003320	CATT_YEAST	P06115
EIS1	YMR031C	4933.8	1.12784	0.0984607	11.4547	0	0	S000004633	EIS1_YEAST	Q05050
MAN2	YNR073C	499.928	1.6162	0.141621	11.4121	0	0	S000005356	MAN2_YEAST	P0CX09
2001-05-01	YER142C	835.432	1.30949	0.114812	11.4056	0	0	S000000944	MAG_YEAST	P22134
SCW11	YGL028C	282.679	-2.07903	0.182665	-11.3816	0	0	S000002996	SCW11_YEAST	P53189
#N/A	YCL042W	3601.79	1.48384	0.130574	11.3639	0	0	S000000547	YCE2_YEAST	P25572
XKS1	YGR194C	1728.99	1.09814	0.096679	11.3586	0	0	S000003426	XKS1_YEAST	P42826
TMT1	YER175C	2223.21	1.3653	0.120728	11.3089	0	0	S000000977	TMT1_YEAST	P32643
GSY2	YLR258W	4136.15	0.877571	0.0777949	11.2806	0	0	S000004248	GYS2_YEAST	P27472
YPS6	YIR039C	1449.14	1.23104	0.109402	11.2525	0	0	S000001478	YPS6_YEAST	P40583
NGR1	YBR212W	3360.99	1.39451	0.124468	11.2038	0	0	S000000416	NGR1_YEAST	P32831
SPG5	YMR191W	1975.65	1.13191	0.101213	11.1835	0	0	S000004803	SPG5_YEAST	P42933
#N/A	YMR206W	1062.84	1.43715	0.128924	11.1472	0	0	S000004819	YM58_YEAST	Q03695
FUN19	YAL034C	1632.59	1.25213	0.112405	11.1394	0	0	S000002134	FUN19_YEAST	P28003
SAF1	YBR280C	1217.39	1.1388	0.102291	11.1329	0	0	S000000484	SAF1_YEAST	P38352
ATG39	YLR312C	1264.69	1.41124	0.126872	11.1234	0	0	S000004303	ATG39_YEAST	Q06159
OYE2	YHR179W	9166.62	1.5612	0.140493	11.1123	0	0	S000001222	OYE2_YEAST	Q03558
NTH1	YDR001C	5173.75	1.10717	0.0998095	11.0928	0	0	S000002408	TREA_YEAST	P32356
BDH1	YAL060W	4687.81	1.11352	0.100893	11.0366	0	0	S000000056	BDH1_YEAST	P39714
LSP1	YPL004C	13669.4	1.04804	0.0950566	11.0254	0	0	S000005925	LSP1_YEAST	Q12230
#N/A	YJR149W	777.812	1.07379	0.0975388	11.0088	0	0	S000003910	2NDP_YEAST	P47177
YGP1	YNL160W	6560.31	1.85357	0.168553	10.997	0	0	S000005104	YGP1_YEAST	P38616
SDH4	YDR178W	3800.7	1.20409	0.109707	10.9755	0	0	S000002585	DHSD_YEAST	P37298
PAI3	YMR174C	617.644	1.59337	0.1456	10.9435	0	0	S000004786	IPA3_YEAST	P01094
#N/A	YJL163C	702.367	1.21066	0.110776	10.9289	0	0	S000003699	YJQ3_YEAST	P46996
CLN2	YPL256C	336.57	-1.46623	0.134321	-10.9159	0	0	S000006177	CG12_YEAST	P20438
EMP46	YLR080W	910.824	1.11077	0.101768	10.9147	0	0	S000004070	EMP46_YEAST	Q12396
CIT1	YNR001C	14443.8	1.19035	0.109112	10.9095	0	0	S000005284	CISY1_YEAST	P00890
GSP2	YOR185C	1493.21	1.22404	0.112374	10.8926	0	0	S000005711	GSP2_YEAST	P32836
#N/A	YLR152C	1009.3	1.36458	0.125535	10.8701	0	0	S000004142	YL152_YEAST	P54072
IMD2	YHR216W	2639.09	1.79672	0.166487	10.792	0	0	S000001259	IMDH2_YEAST	P38697
BOP2	YLR267W	2033.42	0.977767	0.0907235	10.7774	0	0	S000004257	BOP2_YEAST	Q06150
#N/A	YBR089W	236.556	-1.90397	0.176986	-10.7577	0	0	S000000293	YBT9_YEAST	P38252
UTH1	YKR042W	23555.6	1.38192	0.128476	10.7563	0	0	S000001750	UTH1_YEAST	P36135
RPL2B	YIL018W	22856.6	-0.81036	0.0756269	-10.7152	0	0	S000001280	RL2B_YEAST	P0CX46
PDR5	YOR153W	10099.9	3.47013	0.324282	10.701	0	0	S000005679	PDR5_YEAST	P33302
#N/A	YBL028C	618.234	-1.59441	0.149557	-10.6609	0	0	S000000124	YBC8_YEAST	P38202
USV1	YPL230W	3091.05	1.39111	0.130511	10.6589	0	0	S000006151	USV1_YEAST	Q12132
IMA5	YJL216C	218.334	2.27357	0.213316	10.6582	0	0	S000003752	IMA5_YEAST	P40884
POR1	YNL055C	10732.9	1.18677	0.111453	10.6481	0	0	S000005000	VDAC1_YEAST	P04840
TIS11	YLR136C	253.523	1.90506	0.179114	10.636	0	0	S000004126	CTH2_YEAST	P47977
IDP2	YLR174W	4186.24	1.89152	0.178328	10.607	0	0	S000004164	IDHC_YEAST	P41939
ACH1	YBL015W	4970.46	1.48831	0.140323	10.6063	0	0	S000000111	ACH1_YEAST	P32316
DSE4	YNR067C	1031.3	-1.16062	0.10951	-10.5983	0	0	S000005350	ENG1_YEAST	P53753
#N/A	YOR019W	2907.08	1.00457	0.0951672	10.5558	0	0	S000005545	YO019_YEAST	Q99248
UGP1	YKL035W	10445	0.993271	0.0942805	10.5353	0	0	S000001518	UGPA1_YEAST	P32861
IGD1	YFR017C	2079.07	1.41259	0.134407	10.5098	0	0	S000001913	IGD1_YEAST	P43598
EMI2	YDR516C	11933.9	0.947104	0.090376	10.4796	0	0	S000002924	EMI2_YEAST	Q04409
ODC2	YOR222W	2080.01	-1.05962	0.101107	-10.4801	0	0	S000005748	ODC2_YEAST	Q99297
GPX1	YKL026C	1453	1.21139	0.115826	10.4587	0	0	S000001509	GPX1_YEAST	P36014
TRK2	YKR050W	466.01	1.38936	0.132872	10.4564	0	0	S000001758	TRK2_YEAST	P28584
GLK1	YCL040W	32231.3	1.31713	0.126016	10.4521	0	0	S000000545	HXKG_YEAST	P17709
PCS60	YBR222C	1752.49	1.22563	0.117731	10.4104	0	0	S000000426	FAT2_YEAST	P38137
IMP4	YNL075W	732.092	-1.3683	0.131548	-10.4015	0	0	S000005019	IMP4_YEAST	P53941
ZWF1	YNL241C	4856.78	1.5825	0.152543	10.3741	0	0	S000005185	G6PD_YEAST	P11412
HPT1	YDR399W	554.814	-1.15025	0.111351	-10.3299	0	0	S000002807	HPRT_YEAST	Q04178
ERG2	YMR202W	3201.61	-0.973198	0.0942271	-10.3282	0	0	S000004815	ERG2_YEAST	P32352
ATH1	YPR026W	1334.07	1.13303	0.109752	10.3235	0	0	S000006230	ATH1_YEAST	P48016
RPC40	YPR110C	1862.51	-0.958271	0.0928642	-10.3191	0	0	S000006314	RPAC1_YEAST	P07703
AGP1	YCL025C	2865.39	-1.77359	0.171937	-10.3154	0	0	S000000530	AGP1_YEAST	P25376
VMR1	YHL035C	964.927	0.941183	0.091404	10.297	0	0	S000001027	VMR1_YEAST	P38735
ISF1	YMR081C	5900.31	0.900085	0.0874193	10.2962	0	0	S000004686	ISF1_YEAST	P32488
FMP16	YDR070C	2561.18	1.49342	0.14523	10.2832	0	0	S000002477	FMP16_YEAST	Q12497
PDC1	YLR044C	96238.7	0.746521	0.0726709	10.2726	0	0	S000004034	PDC1_YEAST	P06169
YMC2	YBR104W	632.364	-1.09697	0.106853	-10.2661	0	0	S000000308	YMC2_YEAST	P38087
DCD1	YHR144C	247.646	-1.56477	0.152503	-10.2606	0	0	S000001187	DCTD_YEAST	P06773
UBP11	YKR098C	1226.23	1.08222	0.105562	10.252	0	0	S000001806	UBP11_YEAST	P36026
YHM2	YMR241W	1436.13	-1.07607	0.105087	-10.2397	0	0	S000004854	YHM2_YEAST	Q04013
#N/A	YGR127W	639.811	1.08104	0.105852	10.2128	0	0	S000003359	YG37_YEAST	P53275
#N/A	YMR193C-A	143.79	-1.64883	0.162051	-10.1748	0	0	S000004805	YM193_YEAST	Q6B0R2
KGD2	YDR148C	4443.55	1.29566	0.127499	10.1622	0	0	S000002555	ODO2_YEAST	P19262
POL30	YBR088C	315.187	-1.93225	0.190236	-10.1571	0	0	S000000292	PCNA_YEAST	P15873
#N/A	YMR090W	2292.75	1.37544	0.135733	10.1335	0	0	S000004696	YMY0_YEAST	Q04304
HEF3	YNL014W	426.86	1.57244	0.155215	10.1307	0	0	S000004959	EF3B_YEAST	P53978
PAH1	YMR165C	1624.28	0.99255	0.0980596	10.1219	0	0	S000004775	PAH1_YEAST	P32567
SSC1	YJR045C	7900.85	1.82537	0.180386	10.1193	0	0	S000003806	HSP77_YEAST	P0CS90
YPK2	YMR104C	5550.97	0.942486	0.0934649	10.0838	0	0	S000004710	YPK2_YEAST	P18961
SFC1	YJR095W	1718.63	1.80758	0.180064	10.0386	0	0	S000003856	SFC1_YEAST	P33303
#N/A	YNR034W-A	9823.7	1.46861	0.146396	10.0318	0	0	S000007525	YN034_YEAST	Q3E841
IMD1	YAR073W	496.827	1.67928	0.167418	10.0305	0	0	S000000095	IMDH1_YEAST	P39567
STE4	YOR212W	1147.74	-1.00093	0.0998718	-10.0221	0	0	S000005738	GBB_YEAST	P18851
GSC2	YGR032W	2689.71	1.1388	0.113728	10.0133	0	0	S000003264	FKS2_YEAST	P40989
ALG5	YPL227C	317.091	-1.42397	0.142618	-9.98452	0	0	S000006148	ALG5_YEAST	P40350
MLS1	YNL117W	2335.01	1.88482	0.18896	9.97467	0	0	S000005061	MLS1_YEAST	P30952
UGX2	YDL169C	1417.03	1.20863	0.121235	9.96936	0	0	S000002328	UGX2_YEAST	P32772
PIG2	YIL045W	981.673	0.902595	0.09069	9.95253	0	0	S000001307	PIG2_YEAST	P40187
THI80	YOR143C	245.74	-1.81531	0.182553	-9.94401	0	0	S000005669	THI80_YEAST	P35202
PYK2	YOR347C	1592.72	0.903328	0.0908686	9.94104	0	0	S000005874	KPYK2_YEAST	P52489
MCR1	YKL150W	8926.66	1.24015	0.125143	9.90992	0	0	S000001633	MCR1_YEAST	P36060
IMA3	YIL172C	647.716	1.86564	0.1885	9.89726	0	0	S000001434	MALX2_YEAST	P0CW40
IMA4	YJL221C	647.716	1.86564	0.1885	9.89726	0	0	S000003757	MALX4_YEAST	P0CW41
#N/A	YKL107W	195.48	1.50282	0.152119	9.87923	0	0	S000001590	YKK7_YEAST	P34251
FBP26	YJL155C	3059.29	0.8174	0.0831068	9.83554	0	0	S000003691	F26_YEAST	P32604
FMP40	YPL222W	1181.07	1.2474	0.127254	9.80241	0	0	S000006143	SELO_YEAST	Q08968
#N/A	YPL247C	1445.69	1.02422	0.104637	9.78832	0	0	S000006168	YP247_YEAST	Q12523
TPO1	YLL028W	534.781	1.7171	0.175564	9.78049	0	0	S000003951	TPO1_YEAST	Q07824
ASP1	YDR321W	673.856	-1.05475	0.107867	-9.77829	0	0	S000002729	ASPG1_YEAST	P38986
ELO3	YLR372W	1035.1	-1.2989	0.133118	-9.75745	0	0	S000004364	ELO3_YEAST	P40319
AZR1	YGR224W	288.229	1.53332	0.158123	9.697	0	0	S000003456	AZR1_YEAST	P50080
#N/A	YLR363W-A	326.14	-1.28882	0.133224	-9.67408	0	0	S000007620	YL363_YEAST	Q3E747
ALD4	YOR374W	10430	0.95041	0.0982915	9.6693	0	0	S000005901	ALDH4_YEAST	P46367
SDH2	YLL041C	3538.75	1.27038	0.1314	9.66805	0	0	S000003964	SDHB_YEAST	P21801
PHO13	YDL236W	1665.85	-1.00206	0.103712	-9.66193	0	0	S000002395	PNPP_YEAST	P19881
#N/A	YMR181C	1623.21	1.00124	0.103727	9.65262	0	0	S000004793	YM46_YEAST	Q03231
UTP23	YOR004W	454.061	-1.28173	0.133133	-9.62745	0	0	S000005530	UTP23_YEAST	Q12339
HFD1	YMR110C	4293.18	0.934648	0.0970941	9.62621	0	0	S000004716	HFD1_YEAST	Q04458
LAM5	YFL042C	1724.19	0.986696	0.102691	9.60844	0	0	S000001852	LAM5_YEAST	P43560
RPS2	YGL123W	43275.5	-0.746728	0.0777808	-9.60041	0	0	S000003091	RS2_YEAST	P25443
RPN4	YDL020C	3733.76	1.526	0.158982	9.59857	0	0	S000002178	RPN4_YEAST	Q03465
UIP4	YPL186C	1557.75	1.16027	0.121049	9.58515	0	0	S000006107	UIP4_YEAST	Q08926
KAR1	YNL188W	385.316	-1.29496	0.135274	-9.57282	0	0	S000005132	KAR1_YEAST	P11927
PRR2	YDL214C	344.958	1.22957	0.128456	9.57196	0	0	S000002373	PRR2_YEAST	Q12310
RLI1	YDR091C	703.183	-1.21768	0.127327	-9.56343	0	0	S000002498	RLI1_YEAST	Q03195
PLB1	YMR008C	2514.93	0.88723	0.0928536	9.55515	0	0	S000004610	PLB1_YEAST	P39105
SDS24	YBR214W	4893.37	0.976301	0.102556	9.51974	0	0	S000000418	SDS24_YEAST	P38314
GLO4	YOR040W	707.573	0.914046	0.0960602	9.51534	0	0	S000005566	GLO4_YEAST	Q12320
RSB1	YOR049C	801.681	1.4637	0.15402	9.50328	0	0	S000005575	RSB1_YEAST	Q08417
STF1	YDL130W-A	2694.47	1.16058	0.12214	9.50207	0	0	S000007232	STF1_YEAST	P01098
GTT1	YIR038C	1221.32	1.06248	0.111831	9.50076	0	0	S000001477	GST1_YEAST	P40582
#N/A	YKL133C	1461.11	1.10753	0.116636	9.49565	0	0	S000001616	MGR3L_YEAST	P36066
GDT1	YBR187W	695.773	-1.33374	0.141609	-9.41851	0	0	S000000391	GDT1_YEAST	P38301
NCA2	YPR155C	1164.62	0.906069	0.0966032	9.37929	0	0	S000006359	NCA2_YEAST	Q12374
ENB1	YOL158C	604.878	1.01819	0.108708	9.36629	0	0	S000005518	ENB1_YEAST	Q08299
GAL7	YBR018C	58416.4	1.16779	0.124735	9.36221	0	0	S000000222	GAL7_YEAST	P08431
NCR1	YPL006W	1068.76	0.864651	0.0930237	9.29495	0	0	S000005927	NPC1_YEAST	Q12200
ICY1	YMR195W	2173.53	-0.850179	0.0915646	-9.28502	0	0	S000004808	ICY1_YEAST	Q04329
#N/A	YDL199C	521.199	1.05581	0.113917	9.26824	0	0	S000002358	YD199_YEAST	Q12407
BCY1	YIL033C	4703.42	0.883996	0.0958849	9.21934	0	0	S000001295	KAPR_YEAST	P07278
FUM1	YPL262W	4230.59	1.07109	0.116245	9.21411	0	0	S000006183	FUMH_YEAST	P08417
LAP2	YNL045W	1739.6	0.931208	0.101398	9.18366	0	0	S000004990	LKHA4_YEAST	Q10740
PRC1	YMR297W	6952.78	1.00666	0.109668	9.17918	0	0	S000004912	CBPY_YEAST	P00729
ADR1	YDR216W	4489.14	1.24605	0.135961	9.16473	0	0	S000002624	ADR1_YEAST	P07248
PBI2	YNL015W	2328.73	0.940671	0.10289	9.14248	0	0	S000004960	IPB2_YEAST	P0CT04
XBP1	YIL101C	1486.1	1.14312	0.1252	9.13038	0	0	S000001363	XBP1_YEAST	P40489
SOD2	YHR008C	5708.12	1.24809	0.136829	9.12157	0	0	S000001050	SODM_YEAST	P00447
TGS1	YPL157W	198.976	-1.40627	0.15434	-9.11152	0	0	S000006078	TGS1_YEAST	Q12052
NDI1	YML120C	7075.2	1.27087	0.139494	9.11058	0	0	S000004589	NDI1_YEAST	P32340
DSE3	YOR264W	742.237	-1.16305	0.127795	-9.10088	0	0	S000005790	DSE3_YEAST	Q08729
TPK2	YPL203W	2446.07	0.760635	0.0835986	9.09866	0	0	S000006124	KAPB_YEAST	P06245
NPC2	YDL046W	3691.92	0.776097	0.0854547	9.08197	0	0	S000002204	NPC2_YEAST	Q12408
#N/A	YKL071W	984.489	3.63702	0.400583	9.07931	0	0	S000001554	YKH1_YEAST	P36086
GAL10	YBR019C	32014.6	1.35394	0.14933	9.06675	0	0	S000000223	GAL10_YEAST	P04397
PSA1	YDL055C	8358.81	-0.938361	0.103504	-9.06589	0	0	S000002213	MPG1_YEAST	P41940
MDS3	YGL197W	1316.72	1.06846	0.118078	9.04877	0	0	S000003165	MDS3_YEAST	P53094
CAT8	YMR280C	1739.23	0.944133	0.104646	9.02216	0	0	S000004893	CAT8_YEAST	P39113
MCP1	YOR228C	683.196	0.911322	0.101117	9.0126	0	0	S000005754	MCP1_YEAST	Q12106
OSH2	YDL019C	2157.63	0.868899	0.0968054	8.97574	0	0	S000002177	OSH2_YEAST	Q12451
ATP14	YLR295C	4032.05	0.801931	0.0894028	8.96987	0	0	S000004286	ATP14_YEAST	Q12349
#N/A	YLR285C-A	168.65	-1.51127	0.168841	-8.95083	0	0	S000028569	YL285_YEAST	Q3E771
DCS1	YLR270W	3044.59	0.81596	0.0911665	8.95021	0	0	S000004260	DCPS_YEAST	Q06151
PKH2	YOL100W	1517.63	1.14051	0.127716	8.93002	0	0	S000005460	PKH2_YEAST	Q12236
GSM1	YJL103C	1372.13	0.850244	0.0952706	8.92452	0	0	S000003639	GSM1_YEAST	P42950
SDH1	YKL148C	6511.62	1.27338	0.142741	8.92089	0	0	S000001631	SDHA_YEAST	Q00711
UBC5	YDR059C	1017.18	1.25891	0.141334	8.90735	0	0	S000002466	UBC5_YEAST	P15732
ARO7	YPR060C	378.683	-1.10115	0.123873	-8.88934	0	0	S000006264	CHMU_YEAST	P32178
COX20	YDR231C	961.237	0.957785	0.108047	8.8645	0	0	S000002639	COX20_YEAST	Q04935
TMA10	YLR327C	58810.1	1.20412	0.13585	8.86354	0	0	S000004319	TMA10_YEAST	Q06177
FMP46	YKR049C	1714.77	1.11092	0.125608	8.84436	0	0	S000001757	FMP46_YEAST	P36141
#N/A	YIL171W-A	112.253	2.00135	0.226326	8.84276	0	0	S000028798	YI171_YEAST	A0A023PXN9
#N/A	YJL220W	112.253	2.00135	0.226326	8.84276	0	0	S000003756	YJW0_YEAST	P40891
SMF3	YLR034C	635.112	1.32181	0.149503	8.84142	0	0	S000004024	SMF3_YEAST	Q12078
HHF2	YNL030W	12621.1	-1.57076	0.177808	-8.83404	0	0	S000004975	H4_YEAST	P02309
FRT2	YAL028W	398.259	1.0576	0.120074	8.80793	0	0	S000000026	HPH2_YEAST	P39734
TSR3	YOR006C	804.866	-1.08614	0.123359	-8.80477	0	0	S000005532	TSR3_YEAST	Q12094
ADE4	YMR300C	150.785	-1.37813	0.157174	-8.76816	0	0	S000004915	PUR1_YEAST	P04046
IML2	YJL082W	1475.47	0.884103	0.100979	8.75533	0	0	S000003618	IML2_YEAST	P47031
PDR10	YOR328W	910.223	1.41717	0.1619	8.75337	0	0	S000005855	PDR10_YEAST	P51533
PEA2	YER149C	201.875	-1.28579	0.146961	-8.74922	0	0	S000000951	PEA2_YEAST	P40091
YSC84	YHR016C	1688.79	0.790938	0.0904288	8.74653	0	0	S000001058	YSC84_YEAST	P32793
RPB5	YBR154C	1621.52	-0.781439	0.089521	-8.72912	0	0	S000000358	RPAB1_YEAST	P20434
DAL3	YIR032C	353.912	-1.42364	0.163147	-8.72614	0	0	S000001471	ALLA_YEAST	P32459
EEB1	YPL095C	351.499	-1.12147	0.128619	-8.71928	0	0	S000006016	MCFS1_YEAST	Q02891
PEX18	YHR160C	343.593	1.18775	0.136477	8.70297	0	0	S000001203	PEX18_YEAST	P38855
#N/A	YAR075W	150.602	1.69323	0.194638	8.6994	0	0	S000002145	YA075_YEAST	O42831
#N/A	YDL124W	7688.64	0.855445	0.098338	8.69903	0	0	S000002282	KAR_YEAST	Q07551
AAD4	YDL243C	534.911	1.53347	0.176657	8.68052	0	0	S000002402	AAD4_YEAST	Q07747
BNA1	YJR025C	3069.26	1.14158	0.131514	8.68029	0	0	S000003786	3HAO_YEAST	P47096
TPS1	YBR126C	10593.8	1.04913	0.120879	8.67915	0	0	S000000330	TPS1_YEAST	Q00764
#N/A	YBR139W	3531.4	0.753634	0.0869652	8.66593	0	0	S000000343	YBY9_YEAST	P38109
#N/A	YHL046W-A	109.555	1.54162	0.178002	8.6607	0	0	S000028775	YH046_YEAST	A0A023PYG5
ATP1	YBL099W	7352.27	1.29588	0.14974	8.65415	0	0	S000000195	ATPA_YEAST	P07251
ODC1	YPL134C	1221.43	0.991863	0.11474	8.64443	0	0	S000006055	ODC1_YEAST	Q03028
QDR3	YBR043C	1270.99	-0.990245	0.114643	-8.63763	0	0	S000000247	QDR3_YEAST	P38227
#N/A	YLR012C	77.135	2.02242	0.234651	8.61885	0	0	S000004002	YL012_YEAST	Q07927
PPH3	YDR075W	266.577	-1.15291	0.133936	-8.60791	0	0	S000002482	PP4C_YEAST	P32345
PKR1	YMR123W	807.513	-0.965939	0.112425	-8.59183	0	0	S000004730	PKR1_YEAST	Q03880
BRX1	YOL077C	1980.4	-0.918828	0.107129	-8.57684	0	0	S000005437	BRX1_YEAST	Q08235
EFG1	YGR271C-A	433.171	-1.41279	0.164772	-8.57417	0	0	S000007608	EFG1P_YEAST	Q3E705
UTP30	YKR060W	392.941	-1.16955	0.136413	-8.5736	0	0	S000001768	RL1D1_YEAST	P36144
RPL15A	YLR029C	58459	-1.19537	0.139737	-8.55441	0	0	S000004019	RL15A_YEAST	P05748
NTH2	YBR001C	1023.91	0.994582	0.116539	8.53431	0	0	S000000205	TREB_YEAST	P35172
NNR2	YKL151C	2032.84	0.919617	0.107755	8.53435	0	0	S000001634	NNRD_YEAST	P36059
ZNF1	YFL052W	565.492	1.25843	0.147601	8.5259	0	0	S000001842	ZNF1_YEAST	P43551
FRA1	YLL029W	4098.78	1.00332	0.11787	8.51215	0	0	S000003952	FRA1_YEAST	Q07825
URA7	YBL039C	553.304	-1.14714	0.134963	-8.49969	0	0	S000000135	URA7_YEAST	P28274
LYS4	YDR234W	1704.99	-1.32625	0.156101	-8.4961	0	0	S000002642	LYS4_YEAST	P49367
MRI1	YPR118W	827.018	-1.16643	0.137366	-8.49137	0	0	S000006322	MTNA_YEAST	Q06489
RPS19A	YOL121C	5747.31	-0.865566	0.101946	-8.49048	0	0	S000005481	RS19A_YEAST	P07280
GDH2	YDL215C	7944.09	1.05102	0.123849	8.48632	0	0	S000002374	DHE2_YEAST	P33327
GGA1	YDR358W	1539.78	0.84579	0.0996656	8.48628	0	0	S000002766	GGA1_YEAST	Q06336
LEU2	YCL018W	140294	-0.851411	0.100393	-8.48078	0	0	S000000523	LEU3_YEAST	P04173
HHT2	YNL031C	20296	-1.1439	0.135196	-8.46106	0	0	S000004976	H3_YEAST	P61830
YGK3	YOL128C	213.163	-1.21348	0.143503	-8.4561	0	0	S000005488	YGK3_YEAST	Q12222
GDH3	YAL062W	440.411	1.10934	0.131224	8.45378	0	0	S000000058	DHE5_YEAST	P39708
LAG1	YHL003C	1148.54	-1.02062	0.120771	-8.45085	0	0	S000000995	LAG1_YEAST	P38703
RPL15B	YMR121C	2461.37	-0.997932	0.118097	-8.45008	0	0	S000004728	RL15B_YEAST	P54780
HAM1	YJR069C	283.3	-1.18021	0.139809	-8.44154	0	0	S000003830	ITPA_YEAST	P47119
#N/A	YLR460C	57.2345	2.25323	0.267063	8.43708	0	0	S000004452	YL460_YEAST	P54007
KNS1	YLL019C	2095.43	1.03969	0.123331	8.43007	0	0	S000003942	KNS1_YEAST	P32350
GLG2	YJL137C	703.902	0.888269	0.105586	8.41277	0	0	S000003673	GLG2_YEAST	P47011
#N/A	YDR230W	738.778	0.943343	0.112188	8.40858	0	0	S000002638	YD230_YEAST	A0A023PZA9
FCF1	YDR339C	1498.66	-0.898295	0.10684	-8.40784	0	0	S000002747	FCF1_YEAST	Q05498
PEP4	YPL154C	6572.62	0.893869	0.106585	8.38647	0	0	S000006075	CARP_YEAST	P07267
ELO1	YJL196C	782.439	-0.811272	0.0968151	-8.37959	0	0	S000003732	ELO1_YEAST	P39540
#N/A	YJL213W	1264.54	0.973375	0.116194	8.37717	0	0	S000003749	YJV3_YEAST	P40896
RPA34	YJL148W	606.893	-1.11563	0.133197	-8.37573	0	0	S000003684	RPA34_YEAST	P47006
FDO1	YMR144W	160.581	-1.37889	0.164877	-8.36315	0	0	S000004752	FDO1_YEAST	P40214
FRE4	YNR060W	375.614	1.26152	0.151103	8.34875	0	0	S000005343	FRE4_YEAST	P53746
VPS62	YGR141W	1292.29	0.75698	0.0911196	8.30754	0	0	S000003373	VPS62_YEAST	P53285
OXR1	YPL196W	1786.52	0.816462	0.0984872	8.29003	0	0	S000006117	OXR1_YEAST	Q08952
SNZ2	YNL333W	425.191	0.908094	0.109758	8.27359	0	0	S000005277	SNZ2_YEAST	P53824
SNZ3	YFL059W	419.705	0.93508	0.113063	8.27043	0	0	S000001835	SNZ3_YEAST	P43545
HHT1	YBR010W	11412	-1.45827	0.17668	-8.25373	0	0	S000000214	H3_YEAST	P61829
RPF2	YKR081C	1085.05	-0.887378	0.107747	-8.23575	0	0	S000001789	RPF2_YEAST	P36160
CUR1	YPR158W	438.133	1.51289	0.183747	8.23354	0	0	S000006362	CUR1_YEAST	Q06469
FRE5	YOR384W	486.424	1.13311	0.137633	8.23284	0	0	S000005911	FRE5_YEAST	Q08908
UBX5	YDR330W	1455.81	0.970348	0.117932	8.22803	0	0	S000002738	UBX5_YEAST	Q06682
GLN1	YPR035W	7173.95	-1.26938	0.154287	-8.22736	0	0	S000006239	GLNA_YEAST	P32288
ESC1	YMR219W	1498.49	0.886779	0.108054	8.20681	0	0	S000004832	ESC1_YEAST	Q03661
ASE1	YOR058C	689.975	1.1731	0.143004	8.20331	0	0	S000005584	ASE1_YEAST	P50275
ATG33	YLR356W	691.555	0.919082	0.112134	8.19632	0	0	S000004348	ATG33_YEAST	Q06485
RPL12B	YDR418W	17280	-0.862126	0.105263	-8.19021	0	0	S000002826	RL12B_YEAST	P0CX54
MAK3	YPR051W	226.386	-1.18957	0.145255	-8.18952	0	0	S000006255	NAA30_YEAST	Q03503
QCR2	YPR191W	7301.06	1.11936	0.136689	8.18908	0	0	S000006395	QCR2_YEAST	P07257
ENT2	YLR206W	2880.23	0.785055	0.0960265	8.1754	0	0	S000004196	ENT2_YEAST	Q05785
#N/A	YOR283W	716.037	-0.874773	0.107045	-8.17201	0	0	S000005809	YO283_YEAST	Q12040
OPY2	YPR075C	1883.5	0.723825	0.0888333	8.14812	0	0	S000006279	OPY2_YEAST	Q06810
ACA1	YER045C	668.251	1.25925	0.154582	8.14618	0	0	S000000847	ACA1_YEAST	P39970
NVJ2	YPR091C	1078.4	0.853983	0.10497	8.13549	0	0	S000006295	NVJ2_YEAST	Q06833
HNM1	YGL077C	581.108	-0.878112	0.108114	-8.1221	0	0	S000003045	HNM1_YEAST	P19807
RPL36A	YMR194W	5169.42	-0.920322	0.113629	-8.09934	0	0	S000004807	RL36A_YEAST	P05745
MDH1	YKL085W	7361.14	0.847098	0.104649	8.09467	0	0	S000001568	MDHM_YEAST	P17505
#N/A	YPL109C	626.093	0.872509	0.107906	8.08582	0	0	S000006030	YP109_YEAST	Q02981
TPA1	YER049W	783.027	-1.01636	0.12571	-8.08496	0	0	S000000851	TPA1_YEAST	P40032
IMA2	YOL157C	569.996	1.4617	0.180867	8.08162	0	0	S000005517	IMA2_YEAST	Q08295
ATP2	YJR121W	18293.3	1.01589	0.125734	8.07966	0	0	S000003882	ATPB_YEAST	P00830
RSR1	YGR152C	565.401	-1.27129	0.157351	-8.07932	0	0	S000003384	RSR1_YEAST	P13856
YPT31	YER031C	989.987	-0.919528	0.113885	-8.07419	0	0	S000000833	YPT31_YEAST	P38555
BXI1	YNL305C	2071.21	0.738512	0.0915661	8.06535	0	0	S000005249	BXI1_YEAST	P48558
LYS1	YIR034C	4196.04	-1.0154	0.125951	-8.06188	0	0	S000001473	LYS1_YEAST	P38998
#N/A	YNL089C	257.314	-1.15423	0.143177	-8.06156	0	0	S000005033	YNI9_YEAST	P53936
BGL2	YGR282C	15907.8	0.794273	0.0985506	8.05955	0	0	S000003514	BGL2_YEAST	P15703
HSP33	YOR391C	165.676	1.66511	0.206614	8.059	0	0	S000005918	HSP33_YEAST	Q08914
#N/A	YDR417C	12015	-0.888838	0.110327	-8.05641	0	0	S000002825	YD417_YEAST	P87267
GLC3	YEL011W	10239.7	0.616876	0.0765918	8.05407	0	0	S000000737	GLGB_YEAST	P32775
IPI1	YHR085W	178.853	-1.29712	0.1611	-8.05163	0	0	S000001127	IPI1_YEAST	P38803
#N/A	YPR050C	184.834	-1.23055	0.152942	-8.04588	0	0	S000006254	YP050_YEAST	A0A023PZM3
SQT1	YIR012W	439.917	-0.979521	0.12234	-8.00657	0	0	S000001451	SQT1_YEAST	P35184
FYV10	YIL097W	1467.35	0.681705	0.0851544	8.00552	0	0	S000001359	FYV10_YEAST	P40492
#N/A	YPR015C	259.253	1.16579	0.145648	8.00412	0	0	S000006219	YP015_YEAST	Q12531
FCY2	YER056C	1587.64	-1.03281	0.129109	-7.99957	0	0	S000000858	FCY2_YEAST	P17064
TKL2	YBR117C	380.065	1.2071	0.150955	7.99641	0	0	S000000321	TKT2_YEAST	P33315
GUT2	YIL155C	4572.55	1.17435	0.147036	7.98678	0	0	S000001417	GPDM_YEAST	P32191
NOP10	YHR072W-A	3619.71	-1.26204	0.158149	-7.98007	0	0	S000007455	NOP10_YEAST	Q6Q547
CCW14	YLR390W-A	7776.95	0.903025	0.113309	7.96961	0	0	S000006429	CCW14_YEAST	O13547
PSK1	YAL017W	1898.53	0.940384	0.118034	7.96704	0	0	S000000015	PSK1_YEAST	P31374
MIC60	YKR016W	2645.79	0.837967	0.105236	7.96277	0	0	S000001724	MIC60_YEAST	P36112
MRX12	YJR003C	393.424	-0.94585	0.118924	-7.95338	0	0	S000003763	MRX12_YEAST	P47084
RPS12	YOR369C	42546.7	-1.04682	0.131748	-7.94561	0	0	S000005896	RS12_YEAST	P48589
CMS1	YLR003C	888.225	-0.791464	0.0997644	-7.93333	0	0	S000003993	CMS1_YEAST	Q07897
AQY1	YPR192W	288.37	1.38321	0.174448	7.92909	0	0	S000006396	AQY1_YEAST	P0CD91
GZF3	YJL110C	1033.71	-1.02472	0.129273	-7.9268	0	0	S000003646	GZF3_YEAST	P42944
COR1	YBL045C	7910.83	1.03003	0.130085	7.91811	0	0	S000000141	QCR1_YEAST	P07256
RPA49	YNL248C	544.319	-1.25748	0.158844	-7.91646	0	0	S000005192	RPA49_YEAST	Q01080
BNI5	YNL166C	444.483	-1.10791	0.140278	-7.89791	0	0	S000005110	BNI5_YEAST	P53890
FLR1	YBR008C	505.503	1.43453	0.181646	7.89738	0	0	S000000212	FLR1_YEAST	P38124
REG2	YBR050C	668.627	1.08847	0.137938	7.89097	0	0	S000000254	REG2_YEAST	P38232
#N/A	YNL046W	1219.33	-1.5744	0.199821	-7.87908	0	0	S000004991	YNE6_YEAST	P53956
#N/A	YCR061W	505.748	1.20451	0.153042	7.87044	0	0	S000000657	YCV1_YEAST	P25639
#N/A	YKL036C	240.734	1.05292	0.133966	7.85963	0	0	S000001519	YKD6_YEAST	P32859
AIM46	YHR199C	1537.07	0.899347	0.114575	7.8494	0	0	S000001242	AIM46_YEAST	P38885
MES1	YGR264C	1088.8	-1.05591	0.134779	-7.83435	0	0	S000003496	SYMC_YEAST	P00958
GAS1	YMR307W	5232.79	-0.890817	0.113728	-7.83284	0	0	S000004924	GAS1_YEAST	P22146
GLO1	YML004C	4722.57	0.600097	0.0766535	7.8287	0	0	S000004463	LGUL_YEAST	P50107
COQ3	YOL096C	661.671	0.783505	0.100157	7.8228	0	0	S000005456	COQ3_YEAST	P27680
ARN1	YHL040C	255.276	1.19801	0.153307	7.81444	0	0	S000001032	ARN1_YEAST	P38731
ENV9	YOR246C	572.576	-0.97844	0.125207	-7.81458	0	0	S000005772	ENV9_YEAST	Q08651
RIB4	YOL143C	3429.17	-1.07597	0.137711	-7.81328	0	0	S000005503	RIB4_YEAST	P50861
RFC5	YBR087W	822.911	-1.22199	0.156543	-7.80611	0	0	S000000291	RFC5_YEAST	P38251
MNN10	YDR245W	995.416	-0.827921	0.106123	-7.80151	0	0	S000002653	MNN10_YEAST	P50108
#N/A	YKL187C	561.36	1.27776	0.163877	7.79709	0	0	S000001670	YKS7_YEAST	P34231
PRS1	YKL181W	2529.57	-0.691402	0.0886794	-7.79665	0	0	S000001664	KPR1_YEAST	P32895
PMA2	YPL036W	346.743	1.49013	0.19119	7.79399	0	0	S000005957	PMA2_YEAST	P19657
GPT2	YKR067W	1296.02	0.839071	0.107707	7.79029	0	0	S000001775	GPT2_YEAST	P36148
NOP15	YNL110C	1067.89	-1.05549	0.135535	-7.78757	0	0	S000005054	NOP15_YEAST	P53927
ACO1	YLR304C	8065.58	1.04322	0.133988	7.78592	0	0	S000004295	ACON_YEAST	P19414
#N/A	YNR068C	549.911	1.12695	0.144738	7.78614	0	0	S000005351	YN97_YEAST	P53754
#N/A	YJL206C	571.175	0.815335	0.104772	7.78197	0	0	S000003741	YJU6_YEAST	P39529
SHB17	YKR043C	1061.69	-1.04275	0.134064	-7.77802	0	0	S000001751	SHB17_YEAST	P36136
#N/A	YBR056W	3285.68	0.594258	0.0764427	7.7739	0	0	S000000260	YBQ6_YEAST	P38081
STE14	YDR410C	246.842	-1.02053	0.131356	-7.76914	0	0	S000002818	STE14_YEAST	P32584
AIM20	YIL158W	295.654	-1.24743	0.16072	-7.76151	0	0	S000001420	AIM20_YEAST	P40451
#N/A	YGR130C	5827.62	0.662211	0.0853295	7.76064	0	0	S000003362	YG3A_YEAST	P53278
NSG1	YHR133C	464.391	-0.868597	0.111943	-7.75928	0	0	S000001175	NSG1_YEAST	P38837
ALT1	YLR089C	2335.6	0.920903	0.118883	7.7463	0	0	S000004079	ALAM_YEAST	P52893
CBF2	YGR140W	317.102	-0.938704	0.121233	-7.74296	0	0	S000003372	CBF3A_YEAST	P32504
BBC1	YJL020C	3099.9	0.869288	0.112383	7.73505	0	0	S000003557	BBC1_YEAST	P47068
ARP3	YJR065C	2652.8	0.864536	0.111781	7.73419	0	0	S000003826	ARP3_YEAST	P47117
SDH8	YBR269C	1617.01	0.725518	0.0938256	7.73263	0	0	S000000473	SDHF4_YEAST	P38345
ALG7	YBR243C	387.303	-0.880721	0.114075	-7.72052	0	0	S000000447	GPT_YEAST	P07286
CYT1	YOR065W	5701.94	1.11178	0.144014	7.71994	0	0	S000005591	CY1_YEAST	P07143
SNO4	YMR322C	143.63	1.58991	0.206137	7.71287	0	0	S000004941	SNO4_YEAST	Q04902
APE2	YKL157W	2992.2	0.72613	0.0942099	7.70758	0	0	S000001640	APE2_YEAST	P32454
OST6	YML019W	625.825	-0.908378	0.117871	-7.70657	0	0	S000004481	OST6_YEAST	Q03723
CSR2	YPR030W	2553.51	0.980652	0.127396	7.69769	0	0	S000006234	CSR2_YEAST	Q12734
VBA4	YDR119W	674.938	-0.944267	0.122718	-7.69461	0	0	S000002526	VBA4_YEAST	Q04602
RPB10	YOR210W	608.81	-1.09299	0.142164	-7.68819	0	0	S000005736	RPAB5_YEAST	P22139
RRP8	YDR083W	670.178	-0.916735	0.119256	-7.6871	0	0	S000002490	RRP8_YEAST	P38961
#N/A	YMR124W	1505.21	0.753985	0.0980909	7.68659	0	0	S000004731	YM11_YEAST	P39523
CSL4	YNL232W	1027.63	-0.687641	0.089591	-7.67534	0	0	S000005176	CSL4_YEAST	P53859
SNL1	YIL016W	627.026	-1.25903	0.164089	-7.67289	0	0	S000001278	SNL1_YEAST	P40548
RPS18B	YML026C	19294.3	-0.90134	0.117612	-7.66364	0	0	S000004488	RS18B_YEAST	P0CX56
2001-12-01	YLR348C	559.404	-0.854263	0.111485	-7.66256	0	0	S000004340	DIC1_YEAST	Q06143
AKR1	YDR264C	1612.35	0.667165	0.0871053	7.65929	0	0	S000002672	AKR1_YEAST	P39010
EDS1	YBR033W	663.95	0.7875	0.103005	7.64526	0	0	S000000237	EDS1_YEAST	P38073
SDH5	YOL071W	1336.49	0.88355	0.115659	7.63929	0	0	S000005432	SDHF2_YEAST	Q08230
ARA1	YBR149W	5998.31	0.668508	0.0875272	7.63772	0	0	S000000353	ARA1_YEAST	P38115
PXP1	YEL020C	406.713	0.947776	0.124313	7.62411	0	0	S000000746	PXP1_YEAST	P39994
RPS23A	YGR118W	13876.4	-0.782959	0.102756	-7.61957	0	0	S000003350	RS23A_YEAST	P0CX29
TMA16	YOR252W	1015.46	-0.817213	0.107265	-7.61864	0	0	S000005778	TMA16_YEAST	Q08687
HIS6	YIL020C	477.418	-0.9518	0.125092	-7.60881	0	0	S000001282	HIS4_YEAST	P40545
GAR1	YHR089C	2811.88	-0.845656	0.111156	-7.60785	0	0	S000001131	GAR1_YEAST	P28007
PIR1	YKL164C	4807.18	-1.0639	0.139888	-7.60532	0	0	S000001647	PIR1_YEAST	Q03178
POP6	YGR030C	306.932	-1.00946	0.132767	-7.60328	0	0	S000003262	POP6_YEAST	P53218
GSY1	YFR015C	6372.47	0.63285	0.0832633	7.60059	0	0	S000001911	GYS1_YEAST	P23337
IKS1	YJL057C	1187.92	0.683497	0.0899398	7.59949	0	0	S000003593	IKS1_YEAST	P47042
PHB2	YGR231C	2282.2	0.813825	0.107163	7.5943	0	0	S000003463	PHB2_YEAST	P50085
MFA2	YNL145W	896.944	-1.01907	0.13423	-7.59196	0	0	S000005089	MFA2_YEAST	P34166
DAN4	YJR151C	2179.98	1.21879	0.160724	7.5831	0	0	S000003912	DAN4_YEAST	P47179
HTZ1	YOL012C	613.212	-0.812201	0.107116	-7.58243	0	0	S000005372	H2AZ_YEAST	Q12692
BPT1	YLL015W	1103.77	0.730774	0.0964334	7.57802	0	0	S000003938	BPT1_YEAST	P14772
SHE1	YBL031W	95.9732	-1.54005	0.203266	-7.57651	0	0	S000000127	SHE1_YEAST	P38200
BSC5	YNR069C	588.538	1.0089	0.13327	7.57036	0	0	S000005352	BSC5_YEAST	P53755
RKM3	YBR030W	289.284	-1.02543	0.135588	-7.56288	0	0	S000000234	RKM3_YEAST	P38222
ATG40	YOR152C	359.679	1.17548	0.155486	7.56003	0	0	S000005678	ATG40_YEAST	Q99325
NNF1	YJR112W	332.398	-1.05175	0.139195	-7.55592	0	0	S000003873	NNF1_YEAST	P47149
#N/A	YCR016W	923.734	-1.02868	0.136357	-7.54405	0	0	S000000609	YCQ6_YEAST	P25617
DIA3	YDL024C	300.084	0.917093	0.121755	7.53226	0	0	S000002182	PPAD_YEAST	P52290
CDC33	YOL139C	6006.53	-0.823822	0.1094	-7.53039	0	0	S000005499	IF4E_YEAST	P07260
PUS1	YPL212C	354.191	-1.03368	0.13727	-7.5303	0	0	S000006133	PUS1_YEAST	Q12211
GAC1	YOR178C	1991.36	0.740459	0.0983432	7.52934	0	0	S000005704	GAC1_YEAST	P28006
RRP46	YGR095C	593.853	-0.896897	0.119188	-7.52508	0	0	S000003327	RRP46_YEAST	P53256
#N/A	YLR345W	2713.51	0.751473	0.0998668	7.52475	0	0	S000004337	YL345_YEAST	Q06137
RPL1B	YGL135W	21550.5	-0.680672	0.0904971	-7.52148	0	0	S000003103	RL1B_YEAST	P0CX44
MRK1	YDL079C	4302.83	0.80791	0.107417	7.52126	0	0	S000002237	MRK1_YEAST	P50873
THI12	YNL332W	110.587	1.30919	0.174121	7.51882	0	0	S000005276	THI12_YEAST	P42883
GDH1	YOR375C	5002.18	-0.879219	0.11695	-7.51791	0	0	S000005902	DHE4_YEAST	P07262
COX17	YLL009C	574.659	0.908787	0.120945	7.51405	0	0	S000003932	COX17_YEAST	Q12287
FKH1	YIL131C	280.505	-1.12856	0.150241	-7.51171	0	0	S000001393	FKH1_YEAST	P40466
MAL11	YGR289C	949.999	0.917297	0.122204	7.50628	0	0	S000003521	MAL11_YEAST	P53048
RPL40B	YKR094C	17440.1	-0.726043	0.0967765	-7.50226	0	0	S000001802	RL40B_YEAST	P0CH09
POM33	YLL023C	1000.76	0.959659	0.127951	7.5002	0	0	S000003946	POM33_YEAST	Q12164
RHO2	YNL090W	307.505	-1.09109	0.145589	-7.49433	0	0	S000005034	RHO2_YEAST	P06781
#N/A	YLR297W	561.949	0.952849	0.127259	7.48746	0	0	S000004288	YL297_YEAST	Q05899
FRE1	YLR214W	303.253	1.03187	0.137924	7.48145	0	0	S000004204	FRE1_YEAST	P32791
#N/A	YMR114C	1474.13	0.711184	0.0950981	7.47842	0	0	S000004720	YM04_YEAST	Q04471
AHC1	YOR023C	1232.61	0.866881	0.115915	7.47859	0	0	S000005549	AHC1_YEAST	Q12433
RIO2	YNL207W	874.497	-0.764082	0.102189	-7.47714	0	0	S000005151	RIO2_YEAST	P40160
AAD16	YFL057C	387.115	2.45524	0.328482	7.47451	0	0	S000001837	YFL57_YEAST	P43546
LYS14	YDR034C	2773.32	-0.893698	0.119589	-7.47309	0	0	S000002441	LYS14_YEAST	P40971
#N/A	YPL222C-A	183.621	1.07154	0.143449	7.46983	0	0	S000028722	YP22A_YEAST	Q8TGL0
RAS1	YOR101W	565.742	-0.89327	0.119622	-7.46744	0	0	S000005627	RAS1_YEAST	P01119
#N/A	YKL050C	200.244	1.08626	0.145711	7.45492	0	0	S000001533	YKF0_YEAST	P35736
#N/A	YDR354C-A	173.101	-1.09642	0.147077	-7.45468	0	0	S000028613	YD354_YEAST	Q8TGP6
TRM82	YDR165W	846.083	-0.876274	0.11758	-7.4526	0	0	S000002572	TRM82_YEAST	Q03774
PPZ2	YDR436W	1338.68	0.800747	0.107584	7.44301	0	0	S000002844	PPZ2_YEAST	P33329
TSA2	YDR453C	1623.47	0.817086	0.109835	7.43921	0	0	S000002861	TSA2_YEAST	Q04120
POC4	YPL144W	365.417	-1.14955	0.154551	-7.43801	0	0	S000006065	POC4_YEAST	Q12245
MSC3	YLR219W	1445.28	0.773714	0.104028	7.43752	0	0	S000004209	MSC3_YEAST	Q05812
PPT1	YGR123C	345.726	-1.1392	0.153317	-7.43037	0	0	S000003355	PPT1_YEAST	P53043
REE1	YJL217W	3776.76	0.733223	0.0987151	7.42767	0	0	S000003753	REE1_YEAST	P40893
SPO1	YNL012W	558.155	0.810205	0.109216	7.41836	0	0	S000004957	SPO1_YEAST	P53541
SNG1	YGR197C	618.637	1.06738	0.144039	7.41039	0	0	S000003429	SNG1_YEAST	P46950
NOP12	YOL041C	689.208	-1.0229	0.138034	-7.4105	0	0	S000005401	NOP12_YEAST	Q08208
DUS4	YLR405W	258.892	-0.982674	0.133005	-7.38824	0	0	S000004397	DUS4_YEAST	Q06063
RPS1A	YLR441C	30263.6	-0.599096	0.0811599	-7.38167	0	0	S000004433	RS3A1_YEAST	P33442
SEF1	YBL066C	756.278	0.918812	0.124494	7.38036	0	0	S000000162	SEF1_YEAST	P34228
MEF2	YJL102W	806.861	0.843351	0.114322	7.37699	0	0	S000003638	RRF2M_YEAST	P39677
ECM1	YAL059W	755.887	-1.01366	0.137696	-7.36156	0	0	S000000055	ECM1_YEAST	P39715
RRP17	YDR412W	1169.98	-0.860458	0.116902	-7.3605	0	0	S000002820	RRP17_YEAST	Q04031
SPO75	YLL005C	288.112	1.10365	0.150157	7.34999	0	0	S000003928	SPO75_YEAST	Q07798
ALK2	YBL009W	294.927	-0.975179	0.132691	-7.34923	0	0	S000000105	ALK2_YEAST	P32789
NCA3	YJL116C	353.54	1.39639	0.190129	7.34444	0	0	S000003652	NCA3_YEAST	P46955
AIM21	YIR003W	1703.23	0.744138	0.101334	7.34343	0	0	S000001442	AIM21_YEAST	P40563
APT1	YML022W	1608.27	-0.636341	0.0866661	-7.34244	0	0	S000004484	APT1_YEAST	P49435
#N/A	YMR130W	322.964	-1.05802	0.144104	-7.34208	0	0	S000004737	YM14_YEAST	Q04223
ALR2	YFL050C	415.59	0.939833	0.128086	7.33754	0	0	S000001844	ALR2_YEAST	P43553
SMD1	YGR074W	478.791	-0.840117	0.114498	-7.33738	0	0	S000003306	SMD1_YEAST	Q02260
SCD5	YOR329C	1212.36	0.745812	0.101667	7.33585	0	0	S000005856	SCD5_YEAST	P34758
SWE1	YJL187C	309.286	-0.912949	0.124514	-7.33209	0	0	S000003723	SWE1_YEAST	P32944
URA10	YMR271C	1153.44	0.992451	0.135427	7.3283	0	0	S000004884	PYRX_YEAST	P30402
SDO1	YLR022C	649.426	-0.975351	0.133107	-7.32758	0	0	S000004012	SDO1_YEAST	Q07953
ZRT2	YLR130C	854.128	-0.675774	0.092382	-7.31499	0	0	S000004120	ZRT2_YEAST	Q12436
HTL1	YCR020W-B	266.22	-1.25255	0.171271	-7.31325	0	0	S000006439	HTL1_YEAST	Q9URQ5
RPL1A	YPL220W	20670.6	-0.699139	0.0958738	-7.29229	0	0	S000006141	RL1A_YEAST	P0CX43
THI5	YFL058W	115.165	1.23546	0.169504	7.28865	0	0	S000001836	THI5_YEAST	P43534
NOP9	YJL010C	398.775	-0.996931	0.136931	-7.28056	0	0	S000003547	NOP9_YEAST	P47077
PTM1	YKL039W	1796.96	0.724377	0.0995419	7.27711	0	0	S000001522	PTM1_YEAST	P32857
TPS2	YDR074W	7095.66	0.630105	0.086616	7.2747	0	0	S000002481	TPS2_YEAST	P31688
HSP32	YPL280W	170.264	1.5473	0.212824	7.2703	0	0	S000006201	HSP32_YEAST	Q08992
POL32	YJR043C	333.129	-1.13964	0.156836	-7.26643	0	0	S000003804	DPOD3_YEAST	P47110
SHH3	YMR118C	362.733	0.918131	0.126354	7.26632	0	0	S000004724	SHH3_YEAST	Q04487
MHP1	YJL042W	1368.3	0.826185	0.113902	7.25349	0	0	S000003578	MHP1_YEAST	P43638
UTP11	YKL099C	558.264	-0.957863	0.132141	-7.24878	0	0	S000001582	UTP11_YEAST	P34247
EMP70	YLR083C	751.407	-0.906838	0.125127	-7.24737	0	0	S000004073	TMN1_YEAST	P32802
CMK1	YFR014C	2227.78	0.614112	0.084744	7.24667	0	0	S000001910	KCC1_YEAST	P27466
DUT1	YBR252W	505.57	-1.15306	0.159145	-7.24536	0	0	S000000456	DUT_YEAST	P33317
DOT5	YIL010W	1046.97	0.680872	0.0939714	7.24553	0	0	S000001272	DOT5_YEAST	P40553
#N/A	YLR287C	728.415	-0.83209	0.114843	-7.24549	0	0	S000004277	YL287_YEAST	Q05881
REX4	YOL080C	104.197	-1.44543	0.199682	-7.23865	0	0	S000005440	REXO4_YEAST	Q08237
HXT11	YOL156W	298.88	1.26134	0.17432	7.23577	0	0	S000005516	HXT11_YEAST	P54862
ELO2	YCR034W	593.364	-0.983374	0.136045	-7.22831	0	0	S000000630	ELO2_YEAST	P25358
UBX3	YDL091C	1099.18	0.669987	0.09269	7.22825	0	0	S000002249	UBX3_YEAST	Q12229
#N/A	YPR078C	207.763	1.09928	0.152394	7.21342	0	0	S000006282	YP078_YEAST	Q06813
DAK2	YFL053W	154.595	1.16678	0.161758	7.21312	0	0	S000001841	DAK2_YEAST	P43550
YGK1	YGL101W	1044.49	-0.864572	0.119947	-7.20792	0	0	S000003069	YGK1_YEAST	P53144
PCL1	YNL289W	38.7183	-2.16619	0.300537	-7.20771	0	0	S000005233	PCL1_YEAST	P24867
ACL4	YDR161W	1573.3	-0.689876	0.0957587	-7.20432	0	0	S000002568	ACL4_YEAST	Q03771
#N/A	YOR263C	207.248	-1.10593	0.153511	-7.20428	0	0	S000005789	YO263_YEAST	Q08728
RRT8	YOL048C	2431.24	0.925107	0.128425	7.20348	0	0	S000005408	RRT8_YEAST	Q08219
GPM3	YOL056W	235.753	-1.07934	0.150035	-7.19391	0	0	S000005417	PMG3_YEAST	Q12326
HXT9	YJL219W	250.206	1.34358	0.186897	7.18887	0	0	S000003755	HXT9_YEAST	P40885
RPC19	YNL113W	281.299	-0.997452	0.138846	-7.18385	0	0	S000005057	RPAC2_YEAST	P28000
DBP2	YNL112W	921.538	-1.32151	0.184012	-7.18168	0	0	S000005056	DBP2_YEAST	P24783
DNM1	YLL001W	1206.8	0.823557	0.114735	7.17788	0	0	S000003924	DNM1_YEAST	P54861
PAC10	YGR078C	540.009	-0.854587	0.119299	-7.16338	0	0	S000003310	PFD3_YEAST	P48363
FUN14	YAL008W	902.206	0.757832	0.105982	7.1506	0	0	S000000006	FUN14_YEAST	P18411
LPD1	YFL018C	5339.8	0.778764	0.10898	7.14592	0	0	S000001876	DLDH_YEAST	P09624
DPB4	YDR121W	616.223	-0.921502	0.128966	-7.14533	0	0	S000002528	DPB4_YEAST	Q04603
ATG22	YCL038C	471.891	0.842548	0.117968	7.14216	0	0	S000000543	ATG22_YEAST	P25568
MAM3	YOL060C	1042.01	1.00761	0.141255	7.13329	0	0	S000005421	MAM3_YEAST	Q12296
#N/A	YNL103W-A	350.828	1.13836	0.159593	7.13292	0	0	S000028701	YN103_YEAST	Q8TGQ9
MOB2	YFL034C-B	390.41	-0.871142	0.122199	-7.12889	0	0	S000001859	MOB2_YEAST	P43563
SCM4	YGR049W	557.541	-0.743791	0.104635	-7.10845	0	0	S000003281	SCM4_YEAST	P32564
CCW12	YLR110C	80295.8	-0.799542	0.112625	-7.09913	0	0	S000004100	CCW12_YEAST	Q12127
LAM4	YHR080C	1376.15	0.814107	0.114687	7.09851	0	0	S000001122	LAM4_YEAST	P38800
GPN3	YLR243W	642.181	-0.856572	0.120717	-7.0957	0	0	S000004233	GPN3_YEAST	Q06543
PEX25	YPL112C	812.777	-0.754071	0.106284	-7.09488	0	0	S000006033	PEX25_YEAST	Q02969
#N/A	YPL185W	292.658	1.09096	0.154136	7.07791	0	0	S000006106	YP185_YEAST	Q08927
MRX9	YDL027C	1123.01	0.697025	0.0985018	7.07627	0	0	S000002185	MRX9_YEAST	Q07349
PSF1	YDR013W	239.583	-1.1102	0.157004	-7.07119	0	0	S000002420	PSF1_YEAST	Q12488
HXK2	YGL253W	8235.79	-0.969907	0.137191	-7.06976	0	0	S000003222	HXKB_YEAST	P04807
VMA7	YGR020C	3099.61	-0.897708	0.127003	-7.0684	0	0	S000003252	VATF_YEAST	P39111
HMG2	YLR450W	1057.9	0.659262	0.0932773	7.06776	0	0	S000004442	HMDH2_YEAST	P12684
ACB1	YGR037C	2069.79	0.730769	0.103442	7.06453	0	0	S000003269	ACBP_YEAST	P31787
RRP1	YDR087C	1425.19	-0.95483	0.1352	-7.06236	0	0	S000002494	RRP1_YEAST	P35178
#N/A	YMR196W	3171.99	0.674113	0.0954666	7.06125	0	0	S000004809	YM54_YEAST	Q04336
CUE5	YOR042W	2966.16	0.665576	0.0942667	7.06056	0	0	S000005568	CUE5_YEAST	Q08412
SSU72	YNL222W	198.534	-1.13948	0.161419	-7.05917	0	0	S000005166	SSU72_YEAST	P53538
ATO2	YNR002C	855.849	0.898166	0.127264	7.05748	0	0	S000005285	ATO2_YEAST	P32907
2002-09-01	YJL168C	326.5	-0.913351	0.1296	-7.04749	0	0	S000003704	SET2_YEAST	P46995
REG1	YDR028C	2378.57	0.844123	0.120101	7.02843	0	0	S000002435	REG1_YEAST	Q00816
COQ1	YBR003W	816.467	0.673124	0.0957855	7.02741	0	0	S000000207	COQ1_YEAST	P18900
PEX30	YLR324W	1279.77	0.654259	0.0931372	7.02468	0	0	S000004316	PEX30_YEAST	Q06169
MSF1	YPR047W	685.701	0.870699	0.124015	7.02092	0	0	S000006251	SYFM_YEAST	P08425
DUS1	YML080W	129.827	-1.25674	0.179312	-7.00868	0	0	S000004545	DUS1_YEAST	P53759
RRP15	YPR143W	829.405	-0.729019	0.104114	-7.00215	0	0	S000006347	RRP15_YEAST	Q06511
MTL1	YGR023W	1922	0.856233	0.122327	6.99956	0	0	S000003255	MTL1_YEAST	P53214
SCO2	YBR024W	548.298	0.729555	0.104253	6.99795	0	0	S000000228	SCO2_YEAST	P38072
#N/A	YAL059C-A	377.815	-1.00772	0.144353	-6.98089	0	0	S000028734	YA059_YEAST	A0A023PYD0
SEC66	YBR171W	946.552	-0.848302	0.121873	-6.96053	0	0	S000000375	SEC66_YEAST	P33754
FRE6	YLL051C	711.837	0.759636	0.109197	6.95655	0	0	S000003974	FRE6_YEAST	Q12473
#N/A	YNL208W	6731.72	0.598634	0.0860806	6.95434	0	0	S000005152	YNU8_YEAST	P40159
MDV1	YJL112W	1010.08	0.794637	0.114697	6.92813	0	0	S000003648	MDV1_YEAST	P47025
#N/A	YPR127W	1207.58	0.690263	0.0996829	6.92459	0	0	S000006331	PLR1_YEAST	Q06494
CLD1	YGR110W	1179.11	0.979448	0.141488	6.9225	0	0	S000003342	CLD1_YEAST	P53264
MPC3	YGR243W	3803.4	1.00154	0.144788	6.91727	0	0	S000003475	MPC3_YEAST	P53311
NSA2	YER126C	651.035	-0.742975	0.107455	-6.91431	0	0	S000000928	NSA2_YEAST	P40078
HSF1	YGL073W	2134.87	0.761829	0.110236	6.91088	0	0	S000003041	HSF_YEAST	P10961
CDC27	YBL084C	614.117	0.785822	0.113813	6.90448	0	0	S000000180	CDC27_YEAST	P38042
RPS26B	YER131W	22516.9	-1.10218	0.159699	-6.90164	0	0	S000000933	RS26B_YEAST	P39939
RPS24A	YER074W	13953.4	-0.614704	0.0891543	-6.89484	0	0	S000000876	RS24A_YEAST	P0CX31
YPQ2	YDR352W	466.301	-0.924968	0.134233	-6.89075	0	0	S000002760	YPQ2_YEAST	Q06328
GRS2	YPR081C	813.738	0.69096	0.100278	6.89045	0	0	S000006285	SYG2_YEAST	Q06817
#N/A	YOR309C	458.934	-0.885002	0.128501	-6.88713	0	0	S000005836	YO309_YEAST	Q12444
#N/A	YGR073C	352.598	-0.869149	0.126213	-6.88635	0	0	S000003305	YG2E_YEAST	P53247
TRR2	YHR106W	945.169	0.719779	0.104576	6.88286	0	0	S000001148	TRXB2_YEAST	P38816
LEU4	YNL104C	11262.3	0.967048	0.140511	6.88236	0	0	S000005048	LEU1_YEAST	P06208
#N/A	YFL051C	106.252	1.37686	0.200244	6.87591	0	0	S000001843	YFF1_YEAST	P43552
PSF2	YJL072C	505.84	-1.00925	0.146781	-6.87585	0	0	S000003608	PSF2_YEAST	P40359
GEA2	YEL022W	381.381	-0.835856	0.12159	-6.87439	0	0	S000000748	GEA2_YEAST	P39993
TAO3	YIL129C	792.503	0.808987	0.117737	6.87116	0	0	S000001391	TAO3_YEAST	P40468
EFR3	YMR212C	504.121	-0.839386	0.122243	-6.86652	0	0	S000004825	EFR3_YEAST	Q03653
#N/A	YBR242W	1131.11	-0.642729	0.0936131	-6.86581	0	0	S000000446	YB92_YEAST	P38331
JIP5	YPR169W	1211.67	-0.679938	0.0990799	-6.86252	0	0	S000006373	JIP5_YEAST	Q06214
ATG11	YPR049C	472.154	0.885478	0.12927	6.84982	0	0	S000006253	ATG11_YEAST	Q12527
GID8	YMR135C	2387.92	0.66197	0.0966744	6.84742	0	0	S000004742	GID8_YEAST	P40208
TMA108	YIL137C	1293.9	0.729987	0.106622	6.84649	0	0	S000001399	TM108_YEAST	P40462
#N/A	YER148W-A	103.647	-1.22494	0.179061	-6.8409	0	0	S000028760	YE148_YEAST	A0A023PXK2
RPL18B	YNL301C	6417.81	-0.659803	0.0964515	-6.84078	0	0	S000005245	RL18B_YEAST	P0CX50
BUD22	YMR014W	292.423	-0.915242	0.134022	-6.82905	0	0	S000004616	BUD22_YEAST	Q04347
MBR1	YKL093W	896.935	0.682515	0.0999955	6.82545	0	0	S000001576	MBR1_YEAST	P23493
FLO9	YAL063C	423.731	0.795539	0.116693	6.81739	0	0	S000000059	FLO9_YEAST	P39712
SEC63	YOR254C	1062.4	-0.756788	0.111072	-6.81347	0	0	S000005780	SEC63_YEAST	P14906
RTT109	YLL002W	192.34	-1.13662	0.167499	-6.78585	0	0	S000003925	RT109_YEAST	Q07794
SFA1	YDL168W	1253.13	0.852278	0.125708	6.77983	0	0	S000002327	FADH_YEAST	P32771
MDE1	YJR024C	715.838	-0.76146	0.112374	-6.77613	0	0	S000003785	MTNB_YEAST	P47095
PKH3	YDR466W	820.391	0.677082	0.100037	6.76834	0	1.03994e-10	S000002874	PKH3_YEAST	Q03306
RER1	YCL001W	807.208	-0.956239	0.14132	-6.7665	0	1.05202e-10	S000000507	RER1_YEAST	P25560
#N/A	YLR230W	1400.15	-0.845168	0.125027	-6.75987	0	1.09999e-10	S000004220	YL230_YEAST	A0A023PXG7
MIR1	YJR077C	3759.76	1.02445	0.151601	6.75755	0	1.11639e-10	S000003838	MPCP_YEAST	P23641
YPQ1	YOL092W	1097.88	-0.643798	0.0953543	-6.75164	0	1.16148e-10	S000005452	YPQ1_YEAST	Q12010
BMH2	YDR099W	8325.38	0.677226	0.10033	6.74996	0	1.1722e-10	S000002506	BMH2_YEAST	P34730
SDS22	YKL193C	1554.79	0.645192	0.0957111	6.74104	0	1.24353e-10	S000001676	SDS22_YEAST	P36047
SOF1	YLL011W	312.123	-1.05567	0.156749	-6.73478	0	1.29514e-10	S000003934	DCA13_YEAST	P33750
VID30	YGL227W	1664.15	0.585588	0.0869555	6.73434	0	1.29752e-10	S000003196	VID30_YEAST	P53076
AGA2	YGL032C	484.91	-0.788587	0.11717	-6.73029	0	1.33254e-10	S000003000	AGA2_YEAST	P32781
PET9	YBL030C	8065.65	0.969378	0.144235	6.72082	0	1.4171e-10	S000000126	ADT2_YEAST	P18239
YEF1	YEL041W	490.548	0.838502	0.124885	6.71422	0	1.47931e-10	S000000767	YEF1_YEAST	P32622
RPO41	YFL036W	971.026	0.827331	0.123383	6.70536	0	1.56632e-10	S000001858	RPOM_YEAST	P13433
#N/A	YOL036W	1242.55	0.928884	0.138633	6.70028	0	1.61986e-10	S000005396	YO036_YEAST	Q08206
CDC53	YDL132W	1462.56	0.75332	0.112483	6.69717	0	1.65275e-10	S000002290	CDC53_YEAST	Q12018
#N/A	YNL040W	1366.37	0.649618	0.0970335	6.69478	0	1.67808e-10	S000004985	YNE0_YEAST	P53960
RNT1	YMR239C	263.883	-0.931174	0.139143	-6.69223	0	1.70564e-10	S000004852	RNT1_YEAST	Q02555
CST9	YLR394W	305.538	1.00788	0.150626	6.69125	0	1.71511e-10	S000004386	CST9_YEAST	Q06032
RTS1	YOR014W	2616.52	0.623064	0.0931887	6.68605	0	1.77504e-10	S000005540	2A5D_YEAST	P38903
ARD1	YHR013C	828.122	-0.676995	0.10139	-6.67712	0	1.88441e-10	S000001055	ARD1_YEAST	P07347
RPS29A	YLR388W	9439.73	-0.994577	0.148965	-6.6766	0	1.88889e-10	S000004380	RS29A_YEAST	P41057
MSN5	YDR335W	1499.51	0.743014	0.111292	6.67624	0	1.89129e-10	S000002743	MSN5_YEAST	P52918
MAK16	YAL025C	363.93	-0.931404	0.139585	-6.67267	0	1.93562e-10	S000000023	MAK16_YEAST	P10962
SRP21	YKL122C	1767.91	-0.881794	0.132188	-6.67073	0	1.95687e-10	S000001605	SRP21_YEAST	P32342
RPL21A	YBR191W	24636.3	-0.83865	0.125779	-6.66764	0	1.99541e-10	S000000395	RL21A_YEAST	Q02753
GID7	YCL039W	800.403	0.741811	0.111317	6.66393	0	2.04259e-10	S000000544	GID7_YEAST	P25569
COQ4	YDR204W	1054.1	0.636682	0.0956364	6.65732	0	2.13168e-10	S000002612	COQ4_YEAST	O13525
PMT4	YJR143C	917.87	-0.816494	0.122713	-6.65371	0	2.18214e-10	S000003904	PMT4_YEAST	P46971
MDM32	YOR147W	1242.38	0.695141	0.104526	6.65042	0	2.22897e-10	S000005673	MDM32_YEAST	Q12171
TRX1	YLR043C	3062.92	-0.933781	0.140603	-6.64124	0	2.36687e-10	S000004033	TRX1_YEAST	P22217
#N/A	YJR115W	871.107	0.658713	0.0994037	6.62664	0	2.60705e-10	S000003876	YJ85_YEAST	P47152
TEM1	YML064C	377.404	-0.833363	0.125796	-6.62473	0	2.63805e-10	S000004529	TEM1_YEAST	P38987
RPC11	YDR045C	530.868	-0.778149	0.117487	-6.62328	0	2.66101e-10	S000002452	RPC10_YEAST	Q04307
MCH5	YOR306C	302.702	0.821677	0.124083	6.62197	0	2.67948e-10	S000005833	MCH5_YEAST	Q08777
RPS5	YJR123W	51485.6	-0.596491	0.0901028	-6.62011	0	2.7094e-10	S000003884	RS5_YEAST	P26783
UTP9	YHR196W	322.479	-0.966775	0.146193	-6.61301	0	2.83626e-10	S000001239	UTP9_YEAST	P38882
DAL7	YIR031C	374.347	-0.84621	0.128079	-6.60694	0	2.95169e-10	S000001470	MLS2_YEAST	P21826
#N/A	YDR222W	1458.37	-0.869492	0.131611	-6.60654	0	2.95447e-10	S000002630	YDR22_YEAST	Q04925
MKC7	YDR144C	174.493	-0.997903	0.151238	-6.59822	0	3.11651e-10	S000002551	MKC7_YEAST	P53379
FZO1	YBR179C	789.844	0.804928	0.121999	6.59781	0	3.12152e-10	S000000383	FZO1_YEAST	P38297
PAU2	YEL049W	64.9838	1.40806	0.213506	6.59493	0	3.17916e-10	S000000775	PAU2_YEAST	P32612
RRP42	YDL111C	645.918	-0.69997	0.106148	-6.59426	0	3.19002e-10	S000002269	RRP42_YEAST	Q12277
SRC1	YML034W	1519.24	0.702569	0.106575	6.59226	0	3.22974e-10	S000004497	SRC1_YEAST	Q03707
RPL9A	YGL147C	25103.5	-0.728273	0.110507	-6.59031	0	3.26141e-10	S000003115	RL9A_YEAST	P05738
SRM1	YGL097W	652.651	-0.802232	0.121833	-6.58468	0	3.38366e-10	S000003065	RCC1_YEAST	P21827
UBC8	YEL012W	2027.21	0.824314	0.125299	6.57878	0	3.51677e-10	S000000738	UBC8_YEAST	P28263
GND1	YHR183W	5498.5	0.888031	0.134995	6.57827	0	3.52491e-10	S000001226	6PGD1_YEAST	P38720
GLC8	YMR311C	4323.49	0.594854	0.09045	6.57661	0	3.56054e-10	S000004928	GLC8_YEAST	P41818
STO1	YMR125W	781.523	-0.677586	0.103066	-6.57428	0	3.61274e-10	S000004732	NCBP1_YEAST	P34160
ABZ1	YNR033W	1035.48	0.799284	0.121647	6.57051	0	3.69706e-10	S000005316	ADCS_YEAST	P37254
RPS16B	YDL083C	13246.7	-0.604843	0.0920881	-6.56809	0	3.7535e-10	S000002241	RS16B_YEAST	P0CX52
MDL2	YPL270W	1192.82	0.759935	0.115792	6.56293	0	3.88146e-10	S000006191	MDL2_YEAST	P33311
MIC10	YCL057C-A	1095.26	0.723368	0.110245	6.56147	0	3.9112e-10	S000007547	MIC10_YEAST	Q96VH5
#N/A	YGR201C	919.025	0.667326	0.101744	6.55886	0	3.97569e-10	S000003433	YG4D_YEAST	P42936
CTP1	YBR291C	2003.41	-1.25994	0.192135	-6.55755	0	4.00634e-10	S000000495	TXTP_YEAST	P38152
PUS7	YOR243C	594.165	-0.934976	0.142626	-6.55545	0	4.05866e-10	S000005769	PUS7_YEAST	Q08647
MMT2	YPL224C	1085.65	0.660606	0.100812	6.55287	0	4.12492e-10	S000006145	MMT2_YEAST	Q08970
RFS1	YBR052C	3589.89	0.697293	0.106419	6.55231	0	4.13609e-10	S000000256	RFS1_YEAST	P38234
#N/A	YAR009C	1097.87	0.882809	0.134846	6.54681	0	4.28654e-10	S000000067	YA11B_YEAST	O13527
MRP51	YPL118W	1964.87	0.620005	0.0947064	6.5466	0	4.28767e-10	S000006039	RT51_YEAST	Q02950
RRP36	YOR287C	133.824	-1.10531	0.168845	-6.54631	0	4.29136e-10	S000005813	RRP36_YEAST	Q12481
RLP24	YLR009W	1901.87	-0.726405	0.11105	-6.54122	0	4.42062e-10	S000003999	RLP24_YEAST	Q07915
YPS5	YGL259W	188.831	0.972414	0.148685	6.54008	0	4.44968e-10	S000003228	YPS5_YEAST	P53057
XYL2	YLR070C	474.872	0.815324	0.124822	6.53189	0	4.68978e-10	S000004060	XYL2_YEAST	Q07993
RPL34B	YIL052C	12792.3	-0.588991	0.0901942	-6.53025	0	4.7364e-10	S000001314	RL34B_YEAST	P40525
PRS5	YOL061W	862.32	-0.63818	0.0977797	-6.52671	0	4.84449e-10	S000005422	KPR5_YEAST	Q12265
#N/A	YHR182C-A	1581.04	0.928265	0.142261	6.52506	0	4.89267e-10	S000028784	YH182_YEAST	A0A023PZI9
#N/A	YOL107W	176.33	-1.18601	0.181944	-6.51855	0	5.10415e-10	S000005467	TM115_YEAST	Q12239
FOL1	YNL256W	352.217	-0.797339	0.122366	-6.51601	0	5.18581e-10	S000005200	FOL1_YEAST	P53848
COQ6	YGR255C	807.145	0.683889	0.104962	6.51559	0	5.1947e-10	S000003487	COQ6_YEAST	P53318
HXT2	YMR011W	43101.2	0.672893	0.103328	6.5122	0	5.30773e-10	S000004613	HXT2_YEAST	P23585
MCT1	YOR221C	1262.61	0.685188	0.105425	6.49927	0	5.76579e-10	S000005747	FABD_YEAST	Q12283
AIM19	YIL087C	1075.93	0.788899	0.12163	6.48607	0	6.27389e-10	S000001349	AIM19_YEAST	P40502
LOS1	YKL205W	548.509	-0.709299	0.109355	-6.4862	0	6.27389e-10	S000001688	XPOT_YEAST	P33418
FET5	YFL041W	663.378	0.897863	0.138905	6.46387	1.02058e-10	7.23645e-10	S000001853	FET5_YEAST	P43561
SFM1	YOR021C	1576.79	-0.604167	0.0934835	-6.46281	1.02773e-10	7.27941e-10	S000005547	SFM1_YEAST	Q12314
AIM34	YMR003W	247.143	-0.937251	0.145095	-6.45958	1.04992e-10	7.42077e-10	S000004605	AIM34_YEAST	Q03673
FTH1	YBR207W	1389.9	0.809906	0.125393	6.45894	1.05439e-10	7.44444e-10	S000000411	FTH1_YEAST	P38310
RPL31B	YLR406C	8055.63	-0.719709	0.111444	-6.45802	1.0608e-10	7.48179e-10	S000004398	RL31B_YEAST	P0C2H9
SAP155	YFR040W	2457	0.738401	0.114344	6.45771	1.06298e-10	7.4892e-10	S000001936	SA155_YEAST	P43612
ATG15	YCR068W	520.837	0.828892	0.128542	6.44839	1.13041e-10	7.93075e-10	S000000664	ATG15_YEAST	P25641
KSP1	YHR082C	1327.01	0.765852	0.118918	6.44014	1.19362e-10	8.34784e-10	S000001124	KSP1_YEAST	P38691
#N/A	YAR035C-A	37.538	1.92674	0.299294	6.43761	1.21371e-10	8.47054e-10	S000028595	YA035_YEAST	Q8TGV0
RSA3	YLR221C	1442.18	-0.945479	0.146901	-6.43615	1.2254e-10	8.54313e-10	S000004211	RSA3_YEAST	Q05942
VHR2	YER064C	648.011	-0.896194	0.139474	-6.42554	1.31401e-10	9.14178e-10	S000000866	VHR2_YEAST	P40041
LEE1	YPL054W	345.714	0.810311	0.126147	6.42356	1.3312e-10	9.25167e-10	S000005975	LEE1_YEAST	Q02799
FAL1	YDR021W	263.795	-0.877352	0.136686	-6.41875	1.37396e-10	9.53892e-10	S000002428	FAL1_YEAST	Q12099
PCH2	YBR186W	129.629	-1.03383	0.161129	-6.41618	1.39739e-10	9.69149e-10	S000000390	PCH2_YEAST	P38126
TSR2	YLR435W	212.588	-1.06221	0.165661	-6.41198	1.43638e-10	9.9412e-10	S000004427	TSR2_YEAST	Q06672
QCR10	YHR001W-A	2449.6	0.794009	0.12386	6.41056	1.44989e-10	1.00243e-09	S000003529	QCR10_YEAST	P37299
PUF6	YDR496C	881.993	-0.933833	0.145815	-6.40425	1.51113e-10	1.04152e-09	S000002904	PUF6_YEAST	Q04373
RAD33	YML011C	309.332	-0.836876	0.130726	-6.40175	1.5361e-10	1.05763e-09	S000004472	RAD33_YEAST	Q04231
SGO1	YOR073W	124.25	-1.09879	0.171691	-6.39979	1.55591e-10	1.07017e-09	S000005599	SGO1_YEAST	Q08490
CUB1	YPL260W	2760.13	0.671572	0.105001	6.39589	1.59619e-10	1.09674e-09	S000006181	CUB1_YEAST	Q08977
LYS9	YNR050C	12021.6	-1.27883	0.200003	-6.39404	1.61559e-10	1.10893e-09	S000005333	LYS9_YEAST	P38999
#N/A	YKL091C	2019.73	0.615555	0.0962758	6.39367	1.61955e-10	1.1105e-09	S000001574	YKJ1_YEAST	P33324
AVT3	YKL146W	1740.38	0.821824	0.128578	6.39164	1.64118e-10	1.12418e-09	S000001629	AVT3_YEAST	P36062
ERG28	YER044C	2509.34	-0.733652	0.114846	-6.38812	1.67943e-10	1.14919e-09	S000000846	ERG28_YEAST	P40030
DAS2	YDR020C	204.534	-1.01276	0.158687	-6.38209	1.74684e-10	1.1941e-09	S000002427	DAS2_YEAST	Q12084
UFD4	YKL010C	1485.35	0.625489	0.0980335	6.38036	1.76667e-10	1.20641e-09	S000001493	UFD4_YEAST	P33202
NDJ1	YOL104C	73.7048	1.33121	0.209021	6.3688	1.90515e-10	1.29964e-09	S000005464	NDJ1_YEAST	Q12366
MMP1	YLL061W	291.301	0.930493	0.146275	6.36127	2.00092e-10	1.36358e-09	S000003984	MMP1_YEAST	Q12372
#N/A	YOR146W	719.132	-0.719634	0.113134	-6.36088	2.006e-10	1.36564e-09	S000005672	YO146_YEAST	Q08533
LSM7	YNL147W	813.78	-0.69939	0.109985	-6.35895	2.03138e-10	1.3801e-09	S000005091	LSM7_YEAST	P53905
#N/A	YFR018C	735.808	0.650131	0.102269	6.35705	2.05662e-10	1.39582e-09	S000001914	YFI8_YEAST	P43599
DAN1	YJR150C	398.003	1.12483	0.177004	6.35481	2.08685e-10	1.41489e-09	S000003911	DAN1_YEAST	P47178
TRS20	YBR254C	527.452	-0.928138	0.14618	-6.34929	2.16318e-10	1.46366e-09	S000000458	TRS20_YEAST	P38334
#N/A	YNL143C	82.4142	-1.31647	0.207398	-6.34756	2.18755e-10	1.47865e-09	S000005087	YNO3_YEAST	P53908
MNL1	YHR204W	350.802	-0.773122	0.12192	-6.34123	2.27934e-10	1.53913e-09	S000001247	MNL1_YEAST	P38888
PFD1	YJL179W	815.747	-0.999151	0.157586	-6.34034	2.29259e-10	1.54651e-09	S000003715	PFD1_YEAST	P46988
UBI4	YLL039C	10228.4	0.76454	0.120614	6.33873	2.31662e-10	1.55956e-09	S000003962	UBI4P_YEAST	P0CG63
TPD3	YAL016W	3131.93	0.619385	0.0978097	6.33255	2.41145e-10	1.62013e-09	S000000014	2AAA_YEAST	P31383
TRM3	YDL112W	417.444	-0.812323	0.128409	-6.32608	2.51468e-10	1.68778e-09	S000002270	TRM3_YEAST	Q07527
RPL16B	YNL069C	19234.5	-0.601141	0.0950287	-6.32589	2.51779e-10	1.68816e-09	S000005013	RL16B_YEAST	P26785
PET494	YNR045W	960.726	0.632997	0.100085	6.32462	2.53861e-10	1.70041e-09	S000005328	PT494_YEAST	P07390
#N/A	YJR027W	2502.24	0.614338	0.0973279	6.31204	2.75379e-10	1.84084e-09	S000003788	YJ11B_YEAST	P47098
MCM5	YLR274W	569.858	-0.835104	0.132314	-6.31153	2.76291e-10	1.84508e-09	S000004264	MCM5_YEAST	P29496
#N/A	YIL055C	574.579	0.848476	0.134451	6.31068	2.7781e-10	1.85337e-09	S000001317	YIF5_YEAST	P40523
#N/A	YLL020C	250.344	1.03302	0.163866	6.30403	2.90003e-10	1.93084e-09	S000003943	YL020_YEAST	Q07811
FLO5	YHR211W	292.099	0.866269	0.137423	6.30368	2.90669e-10	1.93334e-09	S000001254	FLO5_YEAST	P38894
LAT1	YNL071W	4530.21	0.696546	0.110563	6.29998	2.97688e-10	1.97805e-09	S000005015	ODP2_YEAST	P12695
PRD1	YCL057W	1493.91	0.854912	0.135711	6.2995	2.98613e-10	1.98222e-09	S000000562	PRTD_YEAST	P25375
CGI121	YML036W	505.998	-0.800074	0.127139	-6.29289	3.1161e-10	2.06232e-09	S000004500	CG121_YEAST	Q03705
#N/A	YOL083C-A	126.175	1.02626	0.16313	6.29105	3.15335e-10	2.08491e-09	S000028853	YO83A_YEAST	P0C5R4
GDE1	YPL110C	871.688	0.670321	0.106557	6.29071	3.16023e-10	2.08738e-09	S000006031	GDE1_YEAST	Q02979
#N/A	YGR067C	1581.32	0.789582	0.125595	6.28675	3.24171e-10	2.13485e-09	S000003299	YG2A_YEAST	P53243
EFM4	YIL064W	1096.28	-0.692249	0.110139	-6.28524	3.27355e-10	2.15368e-09	S000001326	EFM4_YEAST	P40516
SPS22	YCL048W	251.99	1.10688	0.17615	6.28373	3.30544e-10	2.17252e-09	S000000553	SPS22_YEAST	P25380
GPI11	YDR302W	333.3	-0.813987	0.129553	-6.28304	3.32011e-10	2.18001e-09	S000002710	GPI11_YEAST	Q06636
GIM3	YNL153C	557.392	-0.888459	0.141437	-6.28168	3.34937e-10	2.19489e-09	S000005097	PFD4_YEAST	P53900
RPL32	YBL092W	32075.5	-0.790067	0.125885	-6.27609	3.47197e-10	2.27299e-09	S000000188	RL32_YEAST	P38061
#N/A	YHR127W	203.873	-1.11272	0.177477	-6.26968	3.61794e-10	2.36623e-09	S000001169	YHS7_YEAST	P38833
SBH1	YER087C-B	985.468	-0.817681	0.130453	-6.26802	3.65664e-10	2.38919e-09	S000002128	SC6B1_YEAST	P52870
#N/A	YIR035C	1224.36	-0.744547	0.118802	-6.26714	3.67736e-10	2.40038e-09	S000001474	YIV5_YEAST	P40579
BUD19	YJL188C	23564.1	-0.958011	0.152926	-6.26456	3.7389e-10	2.43816e-09	S000003724	BUD19_YEAST	O94143
CDC15	YAR019C	735.245	0.624077	0.0996719	6.26131	3.81747e-10	2.48287e-09	S000000072	CDC15_YEAST	P27636
GRX6	YDL010W	664.758	-0.92492	0.147877	-6.25464	3.98422e-10	2.58711e-09	S000002168	GLRX6_YEAST	Q12438
STB1	YNL309W	116.901	-1.23933	0.198148	-6.25455	3.98674e-10	2.58711e-09	S000005253	STB1_YEAST	P42845
SPO16	YHR153C	48.2044	-1.61319	0.258042	-6.25168	4.06052e-10	2.63242e-09	S000001196	SPO16_YEAST	P17122
HAS1	YMR290C	874.537	-0.791482	0.126617	-6.25102	4.07788e-10	2.63984e-09	S000004903	HAS1_YEAST	Q03532
RPL35B	YDL136W	19194.4	-0.836868	0.13413	-6.23921	4.39777e-10	2.84e-09	S000002295	RL35B_YEAST	P0CX85
CDC9	YDL164C	245.514	-0.836968	0.134186	-6.23736	4.45019e-10	2.87106e-09	S000002323	DNLI1_YEAST	P04819
BNS1	YGR230W	454.798	-0.946909	0.151834	-6.23647	4.47542e-10	2.88454e-09	S000003462	BNS1_YEAST	P50084
MSH6	YDR097C	366.764	-0.761616	0.122136	-6.2358	4.49489e-10	2.89429e-09	S000002504	MSH6_YEAST	Q03834
#N/A	YDR365W-B	2446.68	0.58897	0.0945346	6.23021	4.65825e-10	2.99658e-09	S000007401	YD15B_YEAST	P0C2I3
MSS51	YLR203C	1182.43	0.810742	0.130139	6.2298	4.6703e-10	3.00143e-09	S000004193	MSS51_YEAST	P32335
RPS28B	YLR264W	1675.35	-1.00766	0.161982	-6.22082	4.9456e-10	3.17224e-09	S000004254	RS28B_YEAST	P0C0X0
BUB3	YOR026W	213.985	-0.94615	0.152156	-6.21829	5.02607e-10	3.21456e-09	S000005552	BUB3_YEAST	P26449
CIA1	YDR267C	868	-0.634555	0.102082	-6.21615	5.09489e-10	3.25545e-09	S000002675	CIAO1_YEAST	Q05583
#N/A	YDR406W-A	31.8772	2.2368	0.359987	6.21357	5.17947e-10	3.30632e-09	S000028543	YD406_YEAST	P0C5M2
CAN1	YEL063C	1764.43	-0.594665	0.0957166	-6.21276	5.20604e-10	3.31692e-09	S000000789	CAN1_YEAST	P04817
GRE1	YPL223C	196.537	1.0066	0.162019	6.21283	5.20396e-10	3.31692e-09	S000006144	GRE1_YEAST	Q08969
XDJ1	YLR090W	1223.58	0.784552	0.126306	6.2115	5.248e-10	3.34045e-09	S000004080	XDJ1_YEAST	P39102
#N/A	YBR051W	164.94	1.12696	0.181481	6.20976	5.30667e-10	3.36493e-09	S000000255	YBQ1_YEAST	P38233
#N/A	YNL114C	228.402	-0.902646	0.145357	-6.20988	5.30264e-10	3.36493e-09	S000005058	YNL4_YEAST	P53926
#N/A	YLR227W-B	2256.86	0.590794	0.095166	6.20803	5.36522e-10	3.39883e-09	S000007376	YL13B_YEAST	P0C2I6
AGP2	YBR132C	1628.24	0.678383	0.10928	6.20777	5.37402e-10	3.40116e-09	S000000336	AGP2_YEAST	P38090
LSB3	YFR024C-A	1491.42	0.71337	0.114926	6.20723	5.39266e-10	3.40972e-09	S000002968	LSB3_YEAST	P43603
#N/A	YIL077C	1524.35	0.654988	0.105653	6.19944	5.6664e-10	3.57601e-09	S000001339	PUP1_YEAST	P40508
RAD27	YKL113C	387.11	-1.1363	0.183336	-6.19789	5.72246e-10	3.60797e-09	S000001596	FEN1_YEAST	P26793
RIP1	YEL024W	4248.66	0.804651	0.129865	6.19606	5.78955e-10	3.64681e-09	S000000750	UCRI_YEAST	P08067
VMA16	YHR026W	3356.16	-0.833105	0.134519	-6.19319	5.89568e-10	3.70665e-09	S000001068	VATO_YEAST	P23968
#N/A	YML039W	2511.77	0.616303	0.0995329	6.19195	5.94238e-10	3.73248e-09	S000004503	YM12B_YEAST	Q03434
#N/A	YGL188C	466.605	0.948684	0.153358	6.18607	6.16819e-10	3.86702e-09	S000003156	YGT8_YEAST	P53098
NFS1	YCL017C	1925.7	0.705636	0.114087	6.18507	6.20733e-10	3.8879e-09	S000000522	NFS1_YEAST	P25374
NTG1	YAL015C	984.335	0.598049	0.0967276	6.18282	6.29681e-10	3.93654e-09	S000000013	NTH1_YEAST	P31378
PSP1	YDR505C	1530.09	0.619451	0.100251	6.179	6.45078e-10	4.02901e-09	S000002913	PSP1_YEAST	P50896
CPR7	YJR032W	302.171	-0.876904	0.141978	-6.17634	6.56058e-10	4.09375e-09	S000003793	CYP7_YEAST	P47103
DGR2	YKL121W	719.348	0.604197	0.0979329	6.1695	6.85079e-10	4.25888e-09	S000001604	DGR2_YEAST	P32330
#N/A	YPL257W-B	2522.3	0.599591	0.0972026	6.16847	6.89553e-10	4.28269e-09	S000007358	YP11B_YEAST	Q12414
DUO1	YGL061C	246.146	-1.11447	0.18079	-6.16444	7.0735e-10	4.38913e-09	S000003029	DUO1_YEAST	P53168
LEU1	YGL009C	7071.61	-0.755341	0.122577	-6.1622	7.17429e-10	4.44339e-09	S000002977	LEUC_YEAST	P07264
ORC3	YLL004W	142.965	-0.944264	0.153289	-6.16004	7.2727e-10	4.49597e-09	S000003927	ORC3_YEAST	P54790
RGC1	YPR115W	1212.65	0.641084	0.104236	6.15031	7.73297e-10	4.77165e-09	S000006319	RGC1_YEAST	Q06108
#N/A	YER138C	2558.41	0.6052	0.0984184	6.14926	7.78455e-10	4.79903e-09	S000000940	YE11B_YEAST	Q03612
RPL35A	YDL191W	20285.8	-0.796894	0.129614	-6.14818	7.83748e-10	4.82719e-09	S000002350	RL35A_YEAST	P0CX84
RPS19B	YNL302C	15219	-0.820452	0.133496	-6.14587	7.9525e-10	4.88448e-09	S000005246	RS19B_YEAST	P07281
#N/A	YLR157C-B	2472.8	0.597453	0.0972898	6.14097	8.20211e-10	5.03315e-09	S000007374	YL12B_YEAST	P0C2I5
PIN3	YPR154W	1902.34	0.590703	0.096218	6.13922	8.29274e-10	5.08408e-09	S000006358	PIN3_YEAST	Q06449
SDH3	YKL141W	4105.64	0.623164	0.101517	6.1385	8.3304e-10	5.10247e-09	S000001624	SDH3_YEAST	P33421
RRP40	YOL142W	552.633	-0.625959	0.10199	-6.13744	8.38641e-10	5.13205e-09	S000005502	RRP40_YEAST	Q08285
BCP1	YDR361C	1108.04	-0.616366	0.100475	-6.13453	8.54122e-10	5.22199e-09	S000002769	BCP1_YEAST	Q06338
TYW3	YGL050W	502.643	-0.798199	0.130198	-6.13065	8.75189e-10	5.34588e-09	S000003018	TYW3_YEAST	P53177
IPL1	YPL209C	71.6027	-1.59132	0.259613	-6.12961	8.80971e-10	5.37626e-09	S000006130	IPL1_YEAST	P38991
LEU9	YOR108W	649.886	-0.978908	0.15979	-6.1262	9.00029e-10	5.48754e-09	S000005634	LEU9_YEAST	Q12166
RRP4	YHR069C	756.269	-0.603811	0.0986119	-6.1231	9.17702e-10	5.58305e-09	S000001111	RRP4_YEAST	P38792
#N/A	YMR031W-A	75.6231	1.27993	0.209411	6.11208	9.83438e-10	5.96253e-09	S000004634	YM031_YEAST	Q6Q572
#N/A	YOR108C-A	108.551	-1.23433	0.201953	-6.11195	9.84203e-10	5.96253e-09	S000028711	YO108_YEAST	Q8TGL6
FLO10	YKR102W	160.327	1.06672	0.17469	6.10636	1.01931e-09	6.16401e-09	S000001810	FLO10_YEAST	P36170
ILV6	YCL009C	6832.45	0.878408	0.143877	6.10528	1.0262e-09	6.20005e-09	S000000515	ILV6_YEAST	P25605
MDM36	YPR083W	452.842	0.715966	0.117282	6.10467	1.03011e-09	6.21799e-09	S000006287	MDM36_YEAST	Q06820
BUD32	YGR262C	828.638	-0.659507	0.108097	-6.10107	1.05362e-09	6.35415e-09	S000003494	BUD32_YEAST	P53323
RED1	YLR263W	946.606	0.752456	0.123387	6.09832	1.0719e-09	6.45853e-09	S000004253	RED1_YEAST	P14291
HIS7	YBR248C	662.875	-0.839081	0.137608	-6.09763	1.07652e-09	6.47656e-09	S000000452	HIS5_YEAST	P33734
RRG7	YOR305W	556.062	-0.755841	0.123957	-6.09758	1.07683e-09	6.47656e-09	S000005832	RRG7_YEAST	Q08774
IRC5	YFR038W	386.154	-0.694054	0.113842	-6.09665	1.08316e-09	6.49704e-09	S000001934	IRC5_YEAST	P43610
TCB2	YNL087W	1123.27	-0.630099	0.103351	-6.09667	1.08304e-09	6.49704e-09	S000005031	TCB2_YEAST	P48231
#N/A	YPR076W	406.236	0.760572	0.124768	6.09588	1.08838e-09	6.52242e-09	S000006280	YP076_YEAST	O13582
NDE1	YMR145C	10672	0.865112	0.14203	6.09107	1.12161e-09	6.70953e-09	S000004753	NDH1_YEAST	P40215
DAS1	YJL149W	577.155	0.644623	0.105897	6.08726	1.14858e-09	6.86465e-09	S000003685	DAS1_YEAST	P47005
RPL39	YJL189W	20379.8	-0.957189	0.157288	-6.08558	1.16067e-09	6.93072e-09	S000003725	RL39_YEAST	P04650
CDC42	YLR229C	2437.1	-0.65264	0.107321	-6.08121	1.19278e-09	7.1097e-09	S000004219	CDC42_YEAST	P19073
MSD1	YPL104W	370.286	0.801027	0.131729	6.08088	1.19527e-09	7.11817e-09	S000006025	SYDM_YEAST	P15179
TUL1	YKL034W	919.812	0.643121	0.10577	6.08037	1.19904e-09	7.13426e-09	S000001517	TUL1_YEAST	P36096
RPL33A	YPL143W	18520	-0.591542	0.0974184	-6.07218	1.26183e-09	7.48775e-09	S000006064	RL33A_YEAST	P05744
SEN34	YAR008W	119.525	-1.33417	0.219917	-6.0667	1.30567e-09	7.72722e-09	S000000066	SEN34_YEAST	P39707
DSK2	YMR276W	2862.73	0.821036	0.135332	6.06681	1.30478e-09	7.72722e-09	S000004889	DSK2_YEAST	P48510
SHP1	YBL058W	2414.54	0.6483	0.10687	6.06627	1.30918e-09	7.74112e-09	S000000154	UBX1_YEAST	P34223
#N/A	YPL142C	18532.7	-0.590347	0.0973279	-6.06555	1.31504e-09	7.76887e-09	S000006063	YP142_YEAST	Q08916
MGM1	YOR211C	586.335	0.743739	0.122696	6.06163	1.34752e-09	7.95371e-09	S000005737	MGM1_YEAST	P32266
ILM1	YJR118C	841.963	-0.921285	0.152059	-6.05871	1.37215e-09	8.08478e-09	S000003879	ILM1_YEAST	P47155
RPL19B	YBL027W	33203.7	-0.602498	0.0994531	-6.0581	1.37735e-09	8.10821e-09	S000000123	RL19B_YEAST	P0CX83
SSL2	YIL143C	1215.55	0.764485	0.126229	6.05632	1.39272e-09	8.19143e-09	S000001405	RAD25_YEAST	Q00578
PIB1	YDR313C	541.765	0.806681	0.133244	6.05415	1.41157e-09	8.29499e-09	S000002721	PIB1_YEAST	Q06651
TRM13	YOL125W	467.213	-0.631166	0.104328	-6.04982	1.45012e-09	8.50652e-09	S000005485	TRM13_YEAST	Q12383
TRA1	YHR099W	1407.09	0.703534	0.116425	6.04279	1.51475e-09	8.87001e-09	S000001141	TRA1_YEAST	P38811
RPN1	YHR027C	3170.08	0.716925	0.11875	6.03725	1.56762e-09	9.1635e-09	S000001069	RPN1_YEAST	P38764
DOT1	YDR440W	231.916	-0.876491	0.145655	-6.0176	1.77024e-09	1.03298e-08	S000002848	DOT1_YEAST	Q04089
AMD1	YML035C	784.169	0.707067	0.11752	6.01656	1.78167e-09	1.03783e-08	S000004498	AMPD_YEAST	P15274
MSH2	YOL090W	276.047	-0.822766	0.136851	-6.01214	1.83087e-09	1.06369e-08	S000005450	MSH2_YEAST	P25847
#N/A	YFR016C	1811.61	0.677002	0.112678	6.00828	1.87496e-09	1.08836e-08	S000001912	YFI6_YEAST	P43597
TUS1	YLR425W	695.089	0.592856	0.0986965	6.00685	1.89157e-09	1.09609e-08	S000004417	TUS1_YEAST	Q06412
CAR2	YLR438W	1352.23	0.753693	0.125483	6.00632	1.8978e-09	1.09874e-08	S000004430	OAT_YEAST	P07991
PGM1	YKL127W	825.852	-0.661332	0.110119	-6.00562	1.90603e-09	1.10255e-08	S000001610	PGM1_YEAST	P33401
INH1	YDL181W	1710.51	0.691751	0.115211	6.00421	1.92265e-09	1.1112e-08	S000002340	ATIF_YEAST	P01097
PCL7	YIL050W	830.28	0.638112	0.106482	5.99266	2.06439e-09	1.19002e-08	S000001312	PCL7_YEAST	P40186
FMP23	YBR047W	518.098	0.831961	0.138842	5.99216	2.07078e-09	1.19267e-08	S000000251	FMP23_YEAST	P38231
#N/A	YGR053C	199.274	0.869428	0.145196	5.98795	2.12505e-09	1.22287e-08	S000003285	YG21_YEAST	P53234
RPN2	YIL075C	4323.9	0.742369	0.124091	5.98244	2.1982e-09	1.26387e-08	S000001337	RPN2_YEAST	P32565
#N/A	YPL245W	187.212	-0.898455	0.150202	-5.98165	2.20894e-09	1.26895e-08	S000006166	YP245_YEAST	Q12179
#N/A	YNL050C	637.758	-0.672345	0.112511	-5.97581	2.28943e-09	1.31292e-08	S000004995	YNF0_YEAST	P53952
VHR1	YIL056W	1618.04	1.09374	0.183094	5.97364	2.32011e-09	1.32823e-08	S000001318	VHR1_YEAST	P40522
AGP3	YFL055W	236.583	0.806497	0.135017	5.97331	2.32484e-09	1.32974e-08	S000001839	AGP3_YEAST	P43548
DUF1	YOL087C	1520.2	0.631562	0.105733	5.97318	2.32675e-09	1.32974e-08	S000005447	DUF1_YEAST	Q99247
MNN1	YER001W	367.87	-0.716693	0.120003	-5.9723	2.33934e-09	1.33579e-08	S000000803	MNN1_YEAST	P39106
ATG32	YIL146C	421.456	0.80964	0.135582	5.9716	2.34944e-09	1.34041e-08	S000001408	ATG32_YEAST	P40458
2006-09-01	YPL165C	576.381	0.72796	0.121928	5.97041	2.36664e-09	1.34906e-08	S000006086	SET6_YEAST	Q12529
#N/A	YJL132W	516.365	0.67566	0.113184	5.96956	2.3789e-09	1.35489e-08	S000003668	YJN2_YEAST	P47014
#N/A	YLR001C	805.207	0.5962	0.0998966	5.96818	2.39922e-09	1.3653e-08	S000003991	YL001_YEAST	Q07895
NCL1	YBL024W	802.816	-0.77213	0.129656	-5.9552	2.59758e-09	1.47314e-08	S000000120	NCL1_YEAST	P38205
NOP6	YDL213C	1001.4	-0.660906	0.111124	-5.94747	2.72323e-09	1.54046e-08	S000002372	NOP6_YEAST	Q07623
RPL11A	YPR102C	24227.8	-0.679232	0.114297	-5.9427	2.80368e-09	1.58194e-08	S000006306	RL11A_YEAST	P0C0W9
MDM20	YOL076W	146.942	-1.01688	0.171147	-5.94153	2.82375e-09	1.59192e-08	S000005436	NAA25_YEAST	Q12387
MEF1	YLR069C	850.454	0.885193	0.149023	5.93996	2.85095e-09	1.60589e-08	S000004059	EFGM_YEAST	P25039
MAK21	YDR060W	1035.91	-0.753137	0.126898	-5.93498	2.93884e-09	1.6526e-08	S000002467	MAK21_YEAST	Q12176
BIO3	YNR058W	149.839	-0.950696	0.160249	-5.93262	2.98141e-09	1.67512e-08	S000005341	BIOA_YEAST	P50277
HHF1	YBR009C	7448.34	-1.75197	0.295339	-5.93206	2.99158e-09	1.67801e-08	S000000213	H4_YEAST	P02309
#N/A	YOL035C	162.709	1.11452	0.187892	5.93173	2.99755e-09	1.67994e-08	S000005395	YO035_YEAST	Q08207
#N/A	YKL044W	158.824	0.921487	0.155428	5.92871	3.05324e-09	1.70971e-08	S000001527	YKE44_YEAST	P36092
DAL1	YIR027C	148.346	0.995832	0.167994	5.92779	3.07045e-09	1.7179e-08	S000001466	ALN_YEAST	P32375
#N/A	YNR014W	921.591	0.712897	0.120277	5.92711	3.08307e-09	1.72352e-08	S000005297	YN87_YEAST	P53719
RAV1	YJR033C	748.001	0.619821	0.104577	5.92691	3.08681e-09	1.72416e-08	S000003794	RAV1_YEAST	P47104
#N/A	YML116W-A	491.976	0.633864	0.107213	5.91221	3.37547e-09	1.87282e-08	S000004586	YM116_YEAST	Q6B108
#N/A	YIL020C-A	487.608	-0.619883	0.104918	-5.90824	3.45791e-09	1.91697e-08	S000028787	YIL20_YEAST	A0A023PXM7
MEP3	YPR138C	504.312	-0.685195	0.116075	-5.90306	3.56828e-09	1.97651e-08	S000006342	MEP3_YEAST	P53390
DTD1	YDL219W	542.937	-1.18994	0.201596	-5.9026	3.57821e-09	1.98036e-08	S000002378	DTD_YEAST	Q07648
MAL12	YGR292W	419.926	0.791623	0.134172	5.90008	3.63322e-09	2.0058e-08	S000003524	MAL12_YEAST	P53341
AFG1	YEL052W	1564.81	0.687127	0.116477	5.89924	3.65188e-09	2.01443e-08	S000000778	AFG1_YEAST	P32317
HOM2	YDR158W	13360.1	0.761298	0.129078	5.89799	3.6796e-09	2.02637e-08	S000002565	DHAS_YEAST	P13663
CDC14	YFR028C	348.202	-0.83686	0.141988	-5.89389	3.77218e-09	2.07392e-08	S000001924	CDC14_YEAST	Q00684
#N/A	YNL144C	1958.54	0.70171	0.119074	5.89307	3.79076e-09	2.08242e-08	S000005088	YNO4_YEAST	P53907
AIM3	YBR108W	1091.42	0.636681	0.108146	5.88725	3.92676e-09	2.1518e-08	S000000312	AIM3_YEAST	P38266
ZRG8	YER033C	765.524	0.657235	0.111644	5.88686	3.93595e-09	2.15506e-08	S000000835	ZRG8_YEAST	P40021
UTR2	YEL040W	279.538	-1.07926	0.183356	-5.8861	3.95404e-09	2.16248e-08	S000000766	CRH2_YEAST	P32623
#N/A	YLR035C-A	868.911	0.800184	0.135946	5.88602	3.95599e-09	2.16248e-08	S000007225	YL11B_YEAST	Q12088
RNY1	YPL123C	1451.04	0.585142	0.0994283	5.88506	3.97898e-09	2.17326e-08	S000006044	RNY1_YEAST	Q02933
MDM34	YGL219C	1840.07	0.648482	0.110195	5.88484	3.98434e-09	2.17441e-08	S000003187	MDM34_YEAST	P53083
RPS21A	YKR057W	7655.35	-0.772373	0.131297	-5.88263	4.03789e-09	2.20183e-08	S000001765	RS21A_YEAST	P0C0V8
THI13	YDL244W	109.418	1.00421	0.170712	5.88246	4.04202e-09	2.20227e-08	S000002403	THI13_YEAST	Q07748
BNA6	YFR047C	1038.94	0.59748	0.101667	5.87681	4.18236e-09	2.27501e-08	S000001943	NADC_YEAST	P43619
NRK1	YNL129W	286.753	-0.813299	0.138421	-5.87554	4.21466e-09	2.28884e-08	S000005073	NRK1_YEAST	P53915
ICS2	YBR157C	211.306	-0.786769	0.134032	-5.87002	4.35735e-09	2.35672e-08	S000000361	ICS2_YEAST	P38284
#N/A	YLR112W	67.0566	-1.27006	0.216386	-5.86941	4.37359e-09	2.36359e-08	S000004102	YL112_YEAST	Q12130
CYC3	YAL039C	1661.33	0.878756	0.149772	5.86729	4.42968e-09	2.39195e-08	S000000037	CCHL_YEAST	P06182
RPC25	YKL144C	309.488	-0.91229	0.155512	-5.86636	4.45463e-09	2.40153e-08	S000001627	RPC8_YEAST	P35718
FMP10	YER182W	1135.03	0.68174	0.11639	5.85739	4.70198e-09	2.52874e-08	S000000984	FMP10_YEAST	P40098
SKP2	YNL311C	464.756	-0.704305	0.12025	-5.85702	4.71241e-09	2.5323e-08	S000005255	SKP2_YEAST	P42843
PDR17	YNL264C	434.702	-0.628218	0.107279	-5.85593	4.74338e-09	2.54689e-08	S000005208	PDR17_YEAST	P53844
PMU1	YKL128C	533.136	-0.74235	0.126795	-5.85474	4.77771e-09	2.56325e-08	S000001611	PMU1_YEAST	P36069
ACP1	YKL192C	2236.15	0.659797	0.112726	5.85309	4.82528e-09	2.58669e-08	S000001675	ACPM_YEAST	P32463
ARF1	YDL192W	4031.36	-0.670703	0.114595	-5.85283	4.83279e-09	2.58864e-08	S000002351	ARF1_YEAST	P11076
RPL11B	YGR085C	17673.6	-0.641124	0.109582	-5.85064	4.89678e-09	2.61869e-08	S000003317	RL11B_YEAST	Q3E757
RPT5	YOR117W	2963.17	0.712778	0.121854	5.84944	4.93216e-09	2.6355e-08	S000005643	PRS6A_YEAST	P33297
NAT5	YOR253W	786.026	-0.87395	0.14944	-5.84818	4.96989e-09	2.65353e-08	S000005779	NAT5_YEAST	Q08689
#N/A	YHR112C	633.616	0.619926	0.106088	5.84348	5.11201e-09	2.72722e-08	S000001154	YHR2_YEAST	P38716
SLX9	YGR081C	1168.08	-0.624888	0.106955	-5.84251	5.14203e-09	2.74105e-08	S000003313	SLX9_YEAST	P53251
MMM1	YLL006W	541.733	0.640591	0.109655	5.84187	5.16181e-09	2.74939e-08	S000003929	MMM1_YEAST	P41800
RRT14	YIL127C	1125.37	-0.76375	0.130778	-5.84005	5.21842e-09	2.77731e-08	S000001389	RRT14_YEAST	P40470
YME2	YMR302C	1521.04	0.780211	0.133655	5.83752	5.29837e-09	2.81537e-08	S000004917	YME2_YEAST	P32843
#N/A	YMR307C-A	469.49	-0.750055	0.128523	-5.83596	5.34819e-09	2.83505e-08	S000028578	YM307_YEAST	P0C5Q5
LCB3	YJL134W	518.871	-0.775155	0.132844	-5.83508	5.37638e-09	2.84773e-08	S000003670	DS1P1_YEAST	P47013
CNM67	YNL225C	402.62	-0.762754	0.13073	-5.83458	5.39259e-09	2.85404e-08	S000005169	CNM67_YEAST	P53865
IMD4	YML056C	1187.28	-0.755046	0.129454	-5.83257	5.45815e-09	2.88645e-08	S000004520	IMDH4_YEAST	P50094
#N/A	YGL072C	334.487	0.816648	0.140041	5.8315	5.49297e-09	2.90256e-08	S000003040	YGH2_YEAST	P53161
DLD3	YEL071W	2378.85	-0.713659	0.12246	-5.82767	5.62067e-09	2.96533e-08	S000000797	DLD3_YEAST	P39976
LPL1	YOR059C	1145.09	0.642409	0.11027	5.8258	5.68393e-09	2.99396e-08	S000005585	LPL1_YEAST	Q08448
QCR6	YFR033C	7793.66	0.772159	0.132555	5.82518	5.70514e-09	3.00275e-08	S000001929	QCR6_YEAST	P00127
RPS23B	YPR132W	24443.9	-0.686124	0.117845	-5.82228	5.80509e-09	3.04813e-08	S000006336	RS23B_YEAST	P0CX30
AAP1	YHR047C	902.94	0.642753	0.110468	5.81846	5.93924e-09	3.11366e-08	S000001089	AAP1_YEAST	P37898
EDE1	YBL047C	2921.2	0.605873	0.104216	5.81362	6.11351e-09	3.19998e-08	S000000143	EDE1_YEAST	P34216
POM34	YLR018C	362.572	-0.690102	0.118737	-5.81201	6.17274e-09	3.22844e-08	S000004008	POM34_YEAST	Q12445
SRB8	YCR081W	394.121	0.640246	0.110308	5.80419	6.46786e-09	3.38014e-08	S000000677	SRB8_YEAST	P25648
PDC5	YLR134W	450.225	0.618056	0.106488	5.80401	6.47485e-09	3.38114e-08	S000004124	PDC5_YEAST	P16467
RPL18A	YOL120C	30734.2	-0.683672	0.117838	-5.80181	6.56009e-09	3.42297e-08	S000005480	RL18A_YEAST	P0CX49
NSE5	YML023C	453.696	-0.662328	0.114228	-5.79828	6.69973e-09	3.49309e-08	S000004485	NSE5_YEAST	Q03718
GTR1	YML121W	609.286	-0.619468	0.106873	-5.79633	6.77828e-09	3.52852e-08	S000004590	GTR1_YEAST	Q00582
#N/A	YAR028W	443.573	-0.800238	0.138123	-5.79366	6.88668e-09	3.57377e-08	S000000076	YAJ8_YEAST	P39548
AIM44	YPL158C	445.277	-0.876196	0.151233	-5.79367	6.88661e-09	3.57377e-08	S000006079	AIM44_YEAST	Q99299
EBP2	YKL172W	1512.78	-0.684399	0.118153	-5.79247	6.93604e-09	3.59658e-08	S000001655	EBP2_YEAST	P36049
RPL29	YFR032C-A	11456.3	-0.856255	0.14786	-5.79098	6.99758e-09	3.62285e-08	S000006437	RL29_YEAST	P05747
RTA1	YGR213C	154.717	1.0073	0.174059	5.78715	7.15891e-09	3.7035e-08	S000003445	RTA1_YEAST	P53047
PFA5	YDR459C	269.445	-0.783583	0.135423	-5.78619	7.20018e-09	3.71907e-08	S000002867	PFA5_YEAST	Q03289
TAZ1	YPR140W	879.1	0.737501	0.127603	5.77964	7.48609e-09	3.86375e-08	S000006344	TAZ_YEAST	Q06510
DAD3	YBR233W-A	272.29	-1.06187	0.183737	-5.7793	7.50141e-09	3.86866e-08	S000007595	DAD3_YEAST	P69850
RPA12	YJR063W	117.329	-1.04167	0.180354	-5.7757	7.66327e-09	3.94908e-08	S000003824	RPA12_YEAST	P32529
ATG8	YBL078C	2003.42	0.607417	0.105407	5.76258	8.2839e-09	4.25572e-08	S000000174	ATG8_YEAST	P38182
RPS27B	YHR021C	16759.4	-0.873116	0.151523	-5.76228	8.29834e-09	4.25986e-08	S000001063	RS27B_YEAST	P38711
MRN1	YPL184C	701.669	0.718617	0.12482	5.75722	8.55119e-09	4.38627e-08	S000006105	MRN1_YEAST	Q08925
RTT107	YHR154W	281.74	-0.885631	0.153833	-5.75709	8.55782e-09	4.3863e-08	S000001197	RT107_YEAST	P38850
#N/A	YBL005W-B	1380.8	0.680728	0.118369	5.75091	8.87645e-09	4.53912e-08	S000002147	YB11B_YEAST	Q12490
#N/A	YDR042C	75.8567	-1.13806	0.197987	-5.74815	9.02238e-09	4.61021e-08	S000002449	YD042_YEAST	Q03205
SIP2	YGL208W	1033.19	0.611683	0.106424	5.74759	9.05265e-09	4.61858e-08	S000003176	SIP2_YEAST	P34164
KAP123	YER110C	853.879	-0.823791	0.143336	-5.74726	9.07036e-09	4.62408e-08	S000000912	IMB4_YEAST	P40069
MFA1	YDR461W	937.7	0.671827	0.116989	5.74266	9.31981e-09	4.74398e-08	S000002869	MFA1_YEAST	P34165
URA1	YKL216W	9345.16	-1.78255	0.310449	-5.74186	9.36419e-09	4.76293e-08	S000001699	PYRD_YEAST	P28272
TCA17	YEL048C	118.675	-1.0086	0.175691	-5.74078	9.4244e-09	4.7899e-08	S000000774	TCA17_YEAST	P32613
#N/A	YER145C-A	867.513	-1.0988	0.191453	-5.73924	9.51019e-09	4.82981e-08	S000028758	YE145_YEAST	A0A023PYF4
TRP3	YKL211C	1580.68	-0.585263	0.102009	-5.73736	9.61652e-09	4.88009e-08	S000001694	TRPG_YEAST	P00937
SHO1	YER118C	457.973	-0.790547	0.137798	-5.737	9.63693e-09	4.88672e-08	S000000920	SHO1_YEAST	P40073
DYS1	YHR068W	1188.37	-0.666132	0.116135	-5.73583	9.70363e-09	4.9168e-08	S000001110	DHYS_YEAST	P38791
STE24	YJR117W	1635.67	0.82346	0.143759	5.72807	1.01582e-08	5.13932e-08	S000003878	STE24_YEAST	P47154
HFI1	YPL254W	255.866	-0.732903	0.127998	-5.7259	1.02887e-08	5.2014e-08	S000006175	HFI1_YEAST	Q12060
ERS1	YCR075C	207.121	-1.01601	0.177447	-5.72571	1.03004e-08	5.20337e-08	S000000671	ERS1_YEAST	P17261
#N/A	YOR020W-A	703.566	0.725623	0.126744	5.72512	1.0336e-08	5.21341e-08	S000028526	YO020_YEAST	Q3E824
ERO1	YML130C	1198.16	1.04682	0.182882	5.72403	1.04028e-08	5.24315e-08	S000004599	ERO1_YEAST	Q03103
SEC53	YFL045C	4288.96	-0.777657	0.135945	-5.72038	1.06285e-08	5.34474e-08	S000001849	PMM_YEAST	P07283
FRM2	YCL026C-A	120.306	2.22733	0.390017	5.71085	1.12413e-08	5.63591e-08	S000000589	FRM2_YEAST	P37261
SER2	YGR208W	157.456	-0.947511	0.166062	-5.70577	1.15816e-08	5.79846e-08	S000003440	SERB_YEAST	P42941
CDC45	YLR103C	119.768	-1.10036	0.192851	-5.70575	1.1583e-08	5.79846e-08	S000004093	CDC45_YEAST	Q08032
RPL42A	YNL162W	11485.4	-0.778514	0.136496	-5.70359	1.17312e-08	5.85944e-08	S000005106	RL44A_YEAST	P0CX27
MLH3	YPL164C	567.239	0.621531	0.109106	5.69657	1.22241e-08	6.09192e-08	S000006085	MLH3_YEAST	Q12083
PRR1	YKL116C	447.468	-0.827395	0.14529	-5.6948	1.23519e-08	6.15102e-08	S000001599	PRR1_YEAST	P28708
PDR3	YBL005W	464.244	0.868331	0.152485	5.69453	1.23709e-08	6.15476e-08	S000000101	PDR3_YEAST	P33200
NTF2	YER009W	4988.74	-0.732741	0.12868	-5.69431	1.23872e-08	6.15476e-08	S000000811	NTF2_YEAST	P33331
COG3	YER157W	458.107	-0.642157	0.112771	-5.69434	1.2385e-08	6.15476e-08	S000000959	COG3_YEAST	P40094
PBP2	YBR233W	146.575	-0.973193	0.170944	-5.69307	1.24778e-08	6.19055e-08	S000000437	PBP2_YEAST	P38151
PHB1	YGR132C	2314.76	0.645472	0.113459	5.68903	1.27762e-08	6.31977e-08	S000003364	PHB1_YEAST	P40961
GNT1	YOR320C	567.307	-0.676873	0.118976	-5.68915	1.27674e-08	6.31977e-08	S000005847	GNT1_YEAST	Q12096
TIF5	YPR041W	1515.13	-0.657586	0.115804	-5.67842	1.35947e-08	6.69975e-08	S000006245	IF5_YEAST	P38431
ATP18	YML081C-A	2661.04	0.596304	0.105037	5.67707	1.37025e-08	6.74785e-08	S000007247	ATP18_YEAST	P81450
SIM1	YIL123W	1700.65	-0.61633	0.108601	-5.6752	1.38527e-08	6.81176e-08	S000001385	SIM1_YEAST	P40472
SYC1	YOR179C	536.048	-0.602997	0.106255	-5.67503	1.38666e-08	6.81355e-08	S000005705	SYC1_YEAST	Q08553
SAK1	YER129W	811.673	0.636757	0.112332	5.66853	1.4403e-08	7.06152e-08	S000000931	SAK1_YEAST	P38990
LCP5	YER127W	206.924	-0.952078	0.168063	-5.665	1.47028e-08	7.2032e-08	S000000929	LCP5_YEAST	P40079
SYO1	YDL063C	267.852	-0.836865	0.147754	-5.6639	1.47974e-08	7.24418e-08	S000002221	SYO1_YEAST	Q07395
#N/A	YOR289W	1722.55	0.722704	0.127612	5.6633	1.4849e-08	7.26412e-08	S000005815	YO289_YEAST	Q12012
#N/A	YGR151C	198.153	-1.19131	0.210389	-5.66244	1.49238e-08	7.29533e-08	S000003383	YG3N_YEAST	P53287
LYS12	YIL094C	13815.5	-0.863911	0.152744	-5.65595	1.54983e-08	7.55954e-08	S000001356	LYS12_YEAST	P40495
NNT1	YLR285W	757.268	-0.849248	0.15015	-5.65599	1.54954e-08	7.55954e-08	S000004275	EFM7_YEAST	Q05874
OGG1	YML060W	120.193	-1.02562	0.181345	-5.65563	1.55277e-08	7.56831e-08	S000004525	OGG1_YEAST	P53397
SAD1	YFR005C	275.79	-0.724396	0.128089	-5.6554	1.5548e-08	7.57269e-08	S000001901	SAD1_YEAST	P43589
ALG14	YBR070C	408.712	-1.2336	0.218153	-5.65475	1.56076e-08	7.59615e-08	S000000274	ALG14_YEAST	P38242
NOC3	YLR002C	415.339	-0.900523	0.159396	-5.64959	1.60826e-08	7.80453e-08	S000003992	NOC3_YEAST	Q07896
EGT2	YNL327W	1529.35	-1.69342	0.299791	-5.64866	1.61706e-08	7.84151e-08	S000005271	EGT2_YEAST	P42835
RPS11B	YBR048W	16466.1	-0.657147	0.116437	-5.64381	1.66331e-08	8.05405e-08	S000000252	RS11B_YEAST	P0CX48
HPF1	YOL155C	9020.5	0.760429	0.134823	5.64018	1.69871e-08	8.2135e-08	S000005515	HPF1_YEAST	Q05164
TOS1	YBR162C	5442.56	-0.62672	0.111311	-5.63036	1.79833e-08	8.68259e-08	S000000366	TOS1_YEAST	P38288
RPS3	YNL178W	52035.9	-0.629379	0.112137	-5.6126	1.99314e-08	9.57457e-08	S000005122	RS3_YEAST	P05750
GCN3	YKR026C	734.991	-0.679724	0.121187	-5.60888	2.03641e-08	9.75425e-08	S000001734	EI2BA_YEAST	P14741
ARO10	YDR380W	343.957	-0.834602	0.148904	-5.60496	2.08305e-08	9.96331e-08	S000002788	ARO10_YEAST	Q06408
TRS31	YDR472W	377.98	-0.834344	0.148879	-5.60417	2.09254e-08	1.00015e-07	S000002880	TRS31_YEAST	Q03337
RUD3	YOR216C	458.22	-0.751963	0.13419	-5.60371	2.09815e-08	1.00212e-07	S000005742	RUD3_YEAST	Q12234
HRD3	YLR207W	719.38	0.608763	0.108665	5.60221	2.11634e-08	1.01008e-07	S000004197	HRD3_YEAST	Q05787
#N/A	YOR304C-A	252.452	-0.9193	0.164146	-5.60052	2.13712e-08	1.01926e-07	S000005830	YO304_YEAST	O14468
THI7	YLR237W	386.333	0.619491	0.110616	5.60037	2.1389e-08	1.01939e-07	S000004227	THI7_YEAST	Q05998
LIA1	YJR070C	1573.66	-0.765465	0.136689	-5.60004	2.14303e-08	1.02062e-07	S000003831	DOHH_YEAST	P47120
#N/A	YDL011C	234.065	-1.00065	0.178737	-5.59842	2.16312e-08	1.02872e-07	S000002169	YD011_YEAST	Q12023
MRP1	YDR347W	791.53	0.627234	0.112097	5.59546	2.20037e-08	1.04568e-07	S000002755	RT01_YEAST	P10662
DBR1	YKL149C	341.506	-0.820806	0.146722	-5.59431	2.21503e-08	1.05115e-07	S000001632	DBR1_YEAST	P24309
#N/A	YMR209C	456.21	-0.660275	0.118055	-5.59294	2.23251e-08	1.05869e-07	S000004822	YM59_YEAST	Q03648
RPP2A	YOL039W	17671.5	-0.654991	0.11715	-5.59105	2.25702e-08	1.06955e-07	S000005399	RLA2_YEAST	P05319
LSM5	YER146W	1137.85	-1.07855	0.192974	-5.58909	2.28266e-08	1.08017e-07	S000000948	LSM5_YEAST	P40089
SCH9	YHR205W	1103.62	0.621974	0.111406	5.58295	2.36466e-08	1.11738e-07	S000001248	SCH9_YEAST	P11792
#N/A	YMR045C	1599.7	0.608694	0.109032	5.58272	2.36792e-08	1.11813e-07	S000004648	YM13B_YEAST	Q04214
ERR1	YOR393W	71.2169	1.17087	0.209828	5.58015	2.40318e-08	1.13157e-07	S000005920	ERR1_YEAST	P0CX10
MAL32	YBR299W	368.872	0.702919	0.125994	5.57897	2.41946e-08	1.13843e-07	S000000503	MAL32_YEAST	P38158
AAT1	YKL106W	221.977	-0.749507	0.134353	-5.57863	2.4242e-08	1.13985e-07	S000001589	AATM_YEAST	Q01802
#N/A	YPR142C	380.087	-0.729564	0.130795	-5.57794	2.43387e-08	1.14359e-07	S000006346	YPR42_YEAST	O13570
SOK1	YDR006C	1086.79	0.637511	0.114315	5.57677	2.4503e-08	1.15008e-07	S000002413	SOK1_YEAST	P40317
GPI15	YNL038W	643.047	-0.895359	0.160559	-5.5765	2.45406e-08	1.15064e-07	S000004983	GPI15_YEAST	P53961
MRX8	YDR336W	519.543	-0.875919	0.157163	-5.57332	2.49926e-08	1.17019e-07	S000002744	MRX8_YEAST	Q05473
DFR1	YOR236W	312.491	-1.04229	0.187027	-5.57292	2.505e-08	1.17205e-07	S000005762	DYR_YEAST	P07807
#N/A	YLR049C	439.278	-1.21413	0.217889	-5.57226	2.51462e-08	1.17573e-07	S000004039	YL049_YEAST	Q12110
ESL2	YKR096W	1387.39	0.620856	0.111544	5.56604	2.606e-08	1.21674e-07	S000001804	ESL2_YEAST	P36168
ERR2	YPL281C	71.0439	1.16639	0.209571	5.56561	2.6124e-08	1.21888e-07	S000006202	ERR2_YEAST	P0CX11
TAF14	YPL129W	2332.38	-0.609289	0.109496	-5.5645	2.6291e-08	1.22495e-07	S000006050	TAF14_YEAST	P35189
PUT2	YHR037W	1358.04	0.669674	0.120369	5.56352	2.64389e-08	1.23098e-07	S000001079	PUT2_YEAST	P07275
#N/A	YKL065W-A	133.457	1.15638	0.207965	5.56045	2.69086e-08	1.25198e-07	S000113563	YK065_YEAST	Q2V2P2
GET1	YGL020C	911.442	-0.612258	0.110166	-5.55758	2.73539e-08	1.27092e-07	S000002988	GET1_YEAST	P53192
RRP9	YPR137W	227.042	-1.02031	0.183833	-5.55019	2.85354e-08	1.32264e-07	S000006341	RRP9_YEAST	Q06506
PER33	YLR064W	736.051	0.957383	0.172581	5.54745	2.89865e-08	1.34115e-07	S000004054	PER33_YEAST	Q12144
#N/A	YDR381C-A	881.556	0.616638	0.11126	5.5423	2.98517e-08	1.37927e-07	S000007650	YD381_YEAST	Q3E6R5
#N/A	YLR349W	297.138	-0.898573	0.162168	-5.54098	3.00776e-08	1.38707e-07	S000004341	YL349_YEAST	O94086
YTP1	YNL237W	419.233	0.78254	0.141229	5.54095	3.00831e-08	1.38707e-07	S000005181	YTP1_YEAST	P53584
NOP58	YOR310C	1860.54	-0.692224	0.124937	-5.54057	3.0149e-08	1.38915e-07	S000005837	NOP58_YEAST	Q12499
#N/A	YNL013C	62.3664	1.34245	0.242482	5.5363	3.08922e-08	1.42143e-07	S000004958	YNB3_YEAST	P53979
LTE1	YAL024C	137.514	-0.941067	0.170117	-5.53188	3.16819e-08	1.45575e-07	S000000022	LTE1_YEAST	P07866
OCA2	YNL056W	1095.34	-0.642232	0.116115	-5.53101	3.18397e-08	1.46199e-07	S000005001	OCA2_YEAST	P53949
#N/A	YGL102C	31303.5	-0.641383	0.116075	-5.52561	3.28343e-08	1.50558e-07	S000003070	YGK2_YEAST	P53143
ATG4	YNL223W	568.749	0.62362	0.112951	5.52115	3.36794e-08	1.54327e-07	S000005167	ATG4_YEAST	P53867
MIS1	YBR084W	1443.19	-0.845979	0.15342	-5.51414	3.50497e-08	1.60496e-07	S000000288	C1TM_YEAST	P09440
FRE7	YOL152W	97.6523	1.06749	0.193614	5.5135	3.51772e-08	1.60903e-07	S000005512	FRE7_YEAST	Q12333
RPL28	YGL103W	31832.9	-0.641438	0.116407	-5.51029	3.58239e-08	1.63591e-07	S000003071	RL28_YEAST	P02406
SEO1	YAL067C	98.1013	1.11819	0.203111	5.5053	3.68535e-08	1.68177e-07	S000000062	SEO1_YEAST	P39709
#N/A	YHR131C	679.648	0.648472	0.117803	5.50474	3.69714e-08	1.68485e-07	S000001173	YHT1_YEAST	P38835
VMA10	YHR039C-A	3079.89	-0.624367	0.113676	-5.4925	3.96291e-08	1.80349e-07	S000002100	VATG_YEAST	P48836
SMY1	YKL079W	1075.46	0.684156	0.124668	5.4878	4.06967e-08	1.84451e-07	S000001562	SMY1_YEAST	P32364
IRC18	YJL037W	73.74	1.14064	0.20795	5.48519	4.13027e-08	1.8707e-07	S000003574	IRC18_YEAST	P47056
GIS1	YDR096W	2031.83	0.614221	0.111986	5.48479	4.1396e-08	1.87365e-07	S000002503	GIS1_YEAST	Q03833
IZH4	YOL101C	120.928	1.15555	0.210798	5.48182	4.20971e-08	1.9028e-07	S000005461	IZH4_YEAST	Q99393
PGS1	YCL004W	372.067	0.63438	0.11577	5.47966	4.26152e-08	1.92491e-07	S000000510	PGPS1_YEAST	P25578
YSY6	YBR162W-A	1028.23	-0.824906	0.150555	-5.4791	4.27501e-08	1.92839e-07	S000002158	YSY6_YEAST	P38374
PRP5	YBR237W	826.52	0.600826	0.109658	5.47911	4.27477e-08	1.92839e-07	S000000441	PRP5_YEAST	P21372
ECL1	YGR146C	670.374	0.891775	0.163015	5.4705	4.4878e-08	2.02027e-07	S000003378	ECL1_YEAST	P48235
THI11	YJR156C	85.9628	1.05278	0.192593	5.46636	4.59369e-08	2.06236e-07	S000003917	THI11_YEAST	P47183
ECM38	YLR299W	1629.39	0.59662	0.109192	5.46396	4.65638e-08	2.0891e-07	S000004290	ECM38_YEAST	Q05902
RPS20	YHL015W	52067	-0.891215	0.163115	-5.46372	4.6626e-08	2.09048e-07	S000001007	RS20_YEAST	P38701
#N/A	YCL012C	341.501	0.763716	0.139927	5.45796	4.81647e-08	2.15656e-07	S000029705	YCB2_YEAST	Q8J0M4
AFT1	YGL071W	638.695	0.655795	0.120354	5.4489	5.06822e-08	2.26319e-07	S000003039	AFT1_YEAST	P22149
SPC1	YJR010C-A	299.913	-0.796369	0.146176	-5.44801	5.09374e-08	2.27089e-07	S000003770	SPC1_YEAST	P46965
APC2	YLR127C	648.591	0.588294	0.107985	5.44794	5.09569e-08	2.27089e-07	S000004117	APC2_YEAST	Q12440
IPI3	YNL182C	339.017	-0.953561	0.17503	-5.448	5.09396e-08	2.27089e-07	S000005126	IPI3_YEAST	P53877
UTP8	YGR128C	555.647	-0.727228	0.133551	-5.44533	5.17104e-08	2.30293e-07	S000003360	UTP8_YEAST	P53276
#N/A	YPR172W	1666.6	0.615622	0.113236	5.43663	5.4297e-08	2.41167e-07	S000006376	PDXH_YEAST	Q06608
#N/A	YGR176W	30.9912	-1.59298	0.293179	-5.43347	5.52674e-08	2.45313e-07	S000003408	YG3Z_YEAST	P32475
THG1	YGR024C	1326.12	-0.822884	0.151505	-5.43139	5.59161e-08	2.48028e-07	S000003256	THG1_YEAST	P53215
MGR1	YCL044C	365.027	0.690207	0.127117	5.42968	5.6454e-08	2.5008e-07	S000000549	MGR1_YEAST	P25573
PSF3	YOL146W	516.165	-0.941644	0.17353	-5.4264	5.75011e-08	2.54549e-07	S000005506	PSF3_YEAST	Q12146
MIA40	YKL195W	3127.92	0.625316	0.115242	5.4261	5.75979e-08	2.54809e-07	S000001678	MIA40_YEAST	P36046
EAP1	YKL204W	1234.07	0.650038	0.119888	5.42204	5.89235e-08	2.60327e-07	S000001687	EAP1_YEAST	P36041
SFK1	YKL051W	591.747	0.733764	0.135504	5.41507	6.12649e-08	2.70313e-07	S000001534	SFK1_YEAST	P35735
MGA1	YGR249W	1495.97	0.738486	0.136448	5.41219	6.22572e-08	2.74509e-07	S000003481	MGA1_YEAST	P53050
VMA8	YEL051W	3127.36	-0.615687	0.113792	-5.41062	6.28057e-08	2.76744e-07	S000000777	VATD_YEAST	P32610
#N/A	YOR034C-A	99.6377	0.984281	0.181925	5.41035	6.29007e-08	2.76979e-07	S000028856	YO034_YEAST	Q3E735
IDH1	YNL037C	3146.91	0.664613	0.12302	5.40249	6.57232e-08	2.88835e-07	S000004982	IDH1_YEAST	P28834
SCP160	YJL080C	1426.91	-0.812589	0.1505	-5.39927	6.6911e-08	2.93668e-07	S000003616	SC160_YEAST	P06105
SLD2	YKL108W	127.398	-0.927303	0.171745	-5.3993	6.6901e-08	2.93668e-07	S000001591	SLD2_YEAST	P34252
#N/A	YGL258W-A	57.4046	1.18472	0.219491	5.39757	6.75513e-08	2.96282e-07	S000007607	YG258_YEAST	Q3E740
VHS1	YDR247W	911.787	0.612906	0.113633	5.39372	6.9014e-08	3.01704e-07	S000002655	VHS1_YEAST	Q03785
WSC2	YNL283C	449.523	-0.680436	0.126151	-5.39383	6.8973e-08	3.01704e-07	S000005227	WSC2_YEAST	P53832
GIM4	YEL003W	857.609	-0.686449	0.127366	-5.3896	7.06156e-08	3.08503e-07	S000000729	PFD2_YEAST	P40005
#N/A	YKL147C	350.964	0.74247	0.137808	5.3877	7.13648e-08	3.11368e-07	S000001630	YKO7_YEAST	P36061
GWT1	YJL091C	332.715	-0.822166	0.152679	-5.38492	7.24775e-08	3.16015e-07	S000003627	GWT1_YEAST	P47026
#N/A	YGR022C	241.425	0.852465	0.158381	5.38236	7.35163e-08	3.19707e-07	S000003254	YG1E_YEAST	P53213
RPL36B	YPL249C-A	27809.7	-0.744365	0.138354	-5.38013	7.44307e-08	3.23472e-07	S000006438	RL36B_YEAST	O14455
#N/A	YGR290W	218.21	0.738633	0.137315	5.37911	7.48569e-08	3.25112e-07	S000003522	YG61_YEAST	P53339
AVT6	YER119C	717.374	0.59705	0.111135	5.3723	7.77395e-08	3.37192e-07	S000000921	AVT6_YEAST	P40074
#N/A	YOL079W	47.1235	-1.37903	0.256899	-5.36797	7.96288e-08	3.44937e-07	S000005439	YO079_YEAST	Q08238
#N/A	YPL250W-A	27571.4	-0.744424	0.138771	-5.36442	8.12104e-08	3.5156e-07	S000028589	YP250_YEAST	P0C5S0
OKP1	YGR179C	358.872	-0.675063	0.126028	-5.35647	8.48645e-08	3.66663e-07	S000003411	CENPQ_YEAST	P53298
TRL1	YJL087C	196.649	-0.806581	0.150704	-5.3521	8.69408e-08	3.75006e-07	S000003623	TRNL_YEAST	P09880
IFM1	YOL023W	416.512	0.636364	0.11899	5.34806	8.89008e-08	3.83108e-07	S000005383	IF2M_YEAST	P25038
CLB4	YLR210W	156.956	-0.805714	0.1507	-5.34647	8.9688e-08	3.8625e-07	S000004200	CG24_YEAST	P24871
EFM2	YBR271W	248.076	-0.716242	0.134016	-5.34446	9.06856e-08	3.90042e-07	S000000475	EFM2_YEAST	P38347
CIN2	YPL241C	229.242	-0.737485	0.137988	-5.34454	9.06456e-08	3.90042e-07	S000006162	TBCC_YEAST	P46670
NOP56	YLR197W	2606.74	-0.620514	0.11625	-5.33776	9.41011e-08	4.03949e-07	S000004187	NOP56_YEAST	Q12460
ENV10	YLR065C	1202.79	-0.874147	0.164332	-5.31941	1.04107e-07	4.45466e-07	S000004055	ENV10_YEAST	Q99382
RPL13B	YMR142C	29623.9	-0.617253	0.116156	-5.314	1.07247e-07	4.58312e-07	S000004750	RL13B_YEAST	P40212
RNH203	YLR154C	240.812	-0.818711	0.154151	-5.31111	1.08957e-07	4.65322e-07	S000004144	RNH2C_YEAST	Q12338
SWT1	YOR166C	300.079	-0.690203	0.130008	-5.30892	1.10279e-07	4.70203e-07	S000005692	SWT1_YEAST	Q12104
NAR1	YNL240C	756.164	0.871714	0.164252	5.30719	1.1133e-07	4.73936e-07	S000005184	NAR1_YEAST	P23503
RPS25A	YGR027C	29066.3	-0.791284	0.149366	-5.29762	1.17325e-07	4.98817e-07	S000003259	RS25A_YEAST	Q3E792
BUD28	YLR062C	24685	-0.822024	0.155176	-5.29735	1.17492e-07	4.99212e-07	S000004052	BUD28_YEAST	Q07992
SPO77	YLR341W	93.2634	-1.03477	0.195348	-5.29709	1.17665e-07	4.99626e-07	S000004333	SPO77_YEAST	Q06134
CSI2	YOL007C	152.113	-0.940211	0.17766	-5.2922	1.20852e-07	5.12177e-07	S000005367	CSI2_YEAST	Q08054
SAG1	YJR004C	399.114	0.620042	0.117188	5.291	1.21646e-07	5.15217e-07	S000003764	SAG1_YEAST	P20840
RPL22A	YLR061W	24656.6	-0.821875	0.155345	-5.29064	1.21891e-07	5.15925e-07	S000004051	RL22A_YEAST	P05749
UBC9	YDL064W	657.636	-0.594557	0.112407	-5.28935	1.22754e-07	5.1892e-07	S000002222	UBC9_YEAST	P50623
RPL33B	YOR234C	5481.37	-0.603932	0.114177	-5.28945	1.22685e-07	5.1892e-07	S000005760	RL33B_YEAST	P41056
#N/A	YAL016C-A	437.34	0.617159	0.116707	5.28809	1.23597e-07	5.21819e-07	S000028728	YA16A_YEAST	A0A023PYC6
AAD15	YOL165C	111.072	0.991549	0.187675	5.28333	1.26854e-07	5.34553e-07	S000005525	AAD15_YEAST	Q08361
SRB2	YHR041C	265.057	-0.714259	0.13525	-5.28103	1.2846e-07	5.4098e-07	S000001083	MED20_YEAST	P34162
ECO1	YFR027W	109.287	-0.896866	0.169845	-5.2805	1.28832e-07	5.42203e-07	S000001923	ECO1_YEAST	P43605
#N/A	YJR071W	377.474	-0.716434	0.135778	-5.27652	1.31658e-07	5.53048e-07	S000003832	YJ41_YEAST	P47121
SHQ1	YIL104C	162.059	-1.00875	0.191334	-5.27217	1.34819e-07	5.65969e-07	S000001366	SHQ1_YEAST	P40486
RAX1	YOR301W	279.545	-0.764431	0.14501	-5.27156	1.35269e-07	5.675e-07	S000005827	RAX1_YEAST	Q08760
HRK1	YOR267C	2000.36	0.673464	0.127812	5.26918	1.37035e-07	5.74184e-07	S000005793	HRK1_YEAST	Q08732
POL4	YCR014C	264.919	0.684021	0.129915	5.26516	1.40071e-07	5.86037e-07	S000000607	DPO4_YEAST	P25615
UTP21	YLR409C	354.938	-0.79373	0.15075	-5.26523	1.40016e-07	5.86037e-07	S000004401	UTP21_YEAST	Q06078
HUA2	YOR284W	142.837	-1.13623	0.215804	-5.26508	1.40128e-07	5.86037e-07	S000005810	HUA2_YEAST	Q12134
SCO1	YBR037C	458.559	0.68265	0.129681	5.26408	1.4089e-07	5.88856e-07	S000000241	SCO1_YEAST	P23833
YIF1	YNL263C	571.673	-0.616596	0.1173	-5.25658	1.4676e-07	6.1262e-07	S000005207	YIF1_YEAST	P53845
POP5	YAL033W	710.491	-0.882063	0.167829	-5.25574	1.47434e-07	6.15047e-07	S000000031	POP5_YEAST	P28005
SLD7	YOR060C	550.661	-0.725982	0.13832	-5.24858	1.53279e-07	6.38231e-07	S000005586	SLD7_YEAST	Q08457
#N/A	YOL163W	139.254	0.919434	0.175236	5.24684	1.54728e-07	6.43861e-07	S000005523	YO163_YEAST	P0CF20
SWD3	YBR175W	109.077	-0.958124	0.182656	-5.24552	1.55844e-07	6.48102e-07	S000000379	SWD3_YEAST	P38123
YAP7	YOL028C	236.949	-0.737709	0.140718	-5.24245	1.58462e-07	6.58168e-07	S000005388	YAP7_YEAST	Q08182
GET4	YOR164C	1718.87	-0.904002	0.172561	-5.23873	1.61687e-07	6.71141e-07	S000005690	GET4_YEAST	Q12125
TSC10	YBR265W	372.69	-0.603004	0.115138	-5.23723	1.63005e-07	6.7577e-07	S000000469	TSC10_YEAST	P38342
#N/A	YKL162C	361.836	0.587969	0.11227	5.23708	1.63137e-07	6.75896e-07	S000001645	NDUF7_YEAST	P36052
TFC8	YPL007C	424.531	-0.640463	0.122361	-5.23421	1.6569e-07	6.85196e-07	S000005928	TFC8_YEAST	Q12308
#N/A	YFR045W	495.078	0.717881	0.137159	5.23393	1.65947e-07	6.8583e-07	S000001941	YFL5_YEAST	P43617
TEF4	YKL081W	5178.59	-0.604713	0.115558	-5.23299	1.66794e-07	6.88905e-07	S000001564	EF1G2_YEAST	P36008
CSM2	YIL132C	79.6141	-1.21726	0.23285	-5.22763	1.71693e-07	7.07823e-07	S000001394	CSM2_YEAST	P40465
DIM1	YPL266W	1351.4	-0.69212	0.132418	-5.22679	1.72482e-07	7.10636e-07	S000006187	DIM1_YEAST	P41819
SDC1	YDR469W	662.438	-0.633465	0.121211	-5.22613	1.73098e-07	7.12731e-07	S000002877	SDC1_YEAST	Q03323
ERV14	YGL054C	1900.43	-0.759278	0.145558	-5.21635	1.82488e-07	7.50002e-07	S000003022	ERV14_YEAST	P53173
DEF1	YKL054C	2556.25	0.715494	0.137262	5.21261	1.862e-07	7.64787e-07	S000001537	DEF1_YEAST	P35732
ATG9	YDL149W	489.473	0.614217	0.117902	5.20957	1.89284e-07	7.76974e-07	S000002308	ATG9_YEAST	Q12142
AIM24	YJR080C	1147.62	0.65004	0.124972	5.20149	1.97695e-07	8.09504e-07	S000003841	AIM24_YEAST	P47127
HGH1	YGR187C	308.418	-0.737874	0.14202	-5.19556	2.04101e-07	8.32663e-07	S000003419	HGH1_YEAST	P48362
GTT3	YEL017W	400.716	-0.657633	0.126633	-5.19322	2.06691e-07	8.4271e-07	S000000743	GTT3_YEAST	P39996
#N/A	YLL019W-A	135.983	0.922144	0.178023	5.1799	2.21999e-07	9.00714e-07	S000028670	YL019_YEAST	Q8TGM8
MNT4	YNR059W	588.06	-0.645553	0.124653	-5.17882	2.23296e-07	9.05422e-07	S000005342	MNT4_YEAST	P53745
#N/A	YGL218W	731.706	0.6521	0.125974	5.17647	2.26127e-07	9.15788e-07	S000003186	YGW8_YEAST	P53084
STD1	YOR047C	391.122	-0.602364	0.116389	-5.17544	2.27379e-07	9.20298e-07	S000005573	STD1_YEAST	Q02794
UNG1	YML021C	269.664	-0.71293	0.13776	-5.17514	2.27735e-07	9.2118e-07	S000004483	UNG_YEAST	P12887
ARX1	YDR101C	477.06	-0.759504	0.147298	-5.15625	2.51946e-07	1.01603e-06	S000002508	ARX1_YEAST	Q03862
RPO21	YDL140C	1847.16	0.688111	0.133646	5.14876	2.62218e-07	1.05681e-06	S000002299	RPB1_YEAST	P04050
PYP1	YNL010W	2811.78	-0.597558	0.116072	-5.14816	2.63051e-07	1.05953e-06	S000004955	PYP1_YEAST	P53981
ESP1	YGR098C	184.248	-0.886087	0.172168	-5.14663	2.65205e-07	1.06755e-06	S000003330	ESP1_YEAST	Q03018
AAD3	YCR107W	310.906	0.850727	0.165308	5.14633	2.65637e-07	1.06865e-06	S000000704	AAD3_YEAST	P25612
RMA1	YKL132C	97.6505	-0.914952	0.178199	-5.13444	2.82981e-07	1.13705e-06	S000001615	FOLC_YEAST	P36001
GNA1	YFL017C	715.055	-0.711198	0.138629	-5.13022	2.89401e-07	1.16144e-06	S000001877	GNA1_YEAST	P43577
RPS17A	YML024W	25029.4	-0.691329	0.134786	-5.12907	2.91179e-07	1.16757e-06	S000004486	RS17A_YEAST	P02407
PUS4	YNL292W	481.636	-0.603521	0.117923	-5.11794	3.08883e-07	1.23739e-06	S000005236	PUS4_YEAST	P48567
SDA1	YGR245C	834.245	-0.808347	0.15817	-5.11062	3.21096e-07	1.28323e-06	S000003477	SDA1_YEAST	P53313
PRP38	YGR075C	377.172	-0.632888	0.124017	-5.10323	3.33899e-07	1.32961e-06	S000003307	PRP38_YEAST	Q00723
PCC1	YKR095W-A	295.169	-0.748041	0.146769	-5.09674	3.45549e-07	1.37435e-06	S000028512	PCC1_YEAST	Q3E833
#N/A	YCR100C	187.965	0.762919	0.14975	5.09464	3.49413e-07	1.38889e-06	S000000697	YCZ0_YEAST	P25606
PAC1	YOR269W	120.95	-0.847709	0.166537	-5.09021	3.57674e-07	1.42003e-06	S000005795	LIS1_YEAST	P39946
TPK3	YKL166C	196.474	-0.830648	0.16324	-5.08851	3.60887e-07	1.43108e-06	S000001649	KAPC_YEAST	P05986
MXR1	YER042W	601.006	0.826294	0.162395	5.08819	3.61501e-07	1.43266e-06	S000000844	MSRA_YEAST	P40029
#N/A	YOL162W	92.4993	0.959008	0.188763	5.08049	3.76455e-07	1.49015e-06	S000005522	YO162_YEAST	P0CF19
BIO5	YNR056C	188.211	0.746034	0.146958	5.07651	3.84428e-07	1.51991e-06	S000005339	BIO5_YEAST	P53744
TIF11	YMR260C	7441.27	-0.643491	0.126815	-5.07427	3.88987e-07	1.53611e-06	S000004873	IF1A_YEAST	P38912
PDR11	YIL013C	349.359	0.662021	0.130563	5.07049	3.96798e-07	1.56602e-06	S000001275	PDR11_YEAST	P40550
BMT2	YBR141C	252.354	-0.659127	0.130021	-5.06937	3.99133e-07	1.5743e-06	S000000345	BMT2_YEAST	P38278
POA1	YBR022W	317.812	-0.71195	0.140675	-5.06097	4.17139e-07	1.64144e-06	S000000226	POA1_YEAST	P38218
GEA1	YJR031C	354.373	-0.652394	0.128963	-5.05878	4.21948e-07	1.6584e-06	S000003792	GEA1_YEAST	P47102
FAP7	YDL166C	453.389	-0.607576	0.120173	-5.05584	4.28511e-07	1.68192e-06	S000002325	KAD6_YEAST	Q12055
MRPL7	YDR237W	541.41	0.602104	0.119207	5.05091	4.3971e-07	1.72312e-06	S000002645	RM07_YEAST	P36519
SLD5	YDR489W	240.341	-0.73202	0.14509	-5.04527	4.52874e-07	1.77262e-06	S000002897	SLD5_YEAST	Q03406
UBC12	YLR306W	153.896	-0.791311	0.156933	-5.04236	4.59819e-07	1.79875e-06	S000004297	UBC12_YEAST	P52491
#N/A	YGR066C	255.467	0.856022	0.169999	5.03545	4.7672e-07	1.86377e-06	S000003298	YG29_YEAST	P53242
PMS1	YNL082W	186.602	-0.720166	0.143035	-5.03488	4.78141e-07	1.86823e-06	S000005026	PMS1_YEAST	P14242
COG2	YGR120C	463.675	-0.615704	0.122579	-5.02292	5.08923e-07	1.98269e-06	S000003352	COG2_YEAST	P53271
BSC2	YDR275W	250.213	-0.675791	0.134588	-5.02116	5.13593e-07	1.99854e-06	S000002683	BSC2_YEAST	Q05611
AQR1	YNL065W	124.093	-1.17218	0.233496	-5.02014	5.16327e-07	2.00801e-06	S000005009	AQR1_YEAST	P53943
#N/A	YJR146W	85.1002	0.982405	0.195783	5.01783	5.22582e-07	2.02996e-06	S000003907	YJ9K_YEAST	P47174
EAF3	YPR023C	1713.37	0.60805	0.121311	5.01234	5.37707e-07	2.08628e-06	S000006227	EAF3_YEAST	Q12432
RPL31A	YDL075W	30335.1	-0.645457	0.128861	-5.00896	5.4726e-07	2.12211e-06	S000002233	RL31A_YEAST	P0C2H8
STF2	YGR008C	17147.4	0.649162	0.129605	5.00877	5.47784e-07	2.1229e-06	S000003240	STF2_YEAST	P16965
RRT2	YBR246W	495.503	-0.586075	0.117041	-5.00743	5.51616e-07	2.13651e-06	S000000450	DPH7_YEAST	P38332
UBA1	YKL210W	2746.75	0.673869	0.134582	5.00712	5.52516e-07	2.13875e-06	S000001693	UBA1_YEAST	P22515
RPS30B	YOR182C	10127.4	-0.801432	0.160167	-5.00374	5.62286e-07	2.1753e-06	S000005708	RS30B_YEAST	P0CX34
ERR3	YMR323W	53.6448	1.1484	0.230128	4.99028	6.02912e-07	2.32303e-06	S000004942	ERR3_YEAST	P42222
MTW1	YAL034W-A	244.268	-0.795546	0.159601	-4.98459	6.20946e-07	2.38974e-06	S000000032	MTW1_YEAST	P39731
NCE102	YPR149W	12005.8	0.712172	0.143031	4.97914	6.38672e-07	2.45512e-06	S000006353	NCE2_YEAST	Q12207
IRC20	YLR247C	1118.08	0.628981	0.12644	4.97456	6.53962e-07	2.50667e-06	S000004237	IRC20_YEAST	Q06554
HSL1	YKL101W	395.329	-0.694814	0.139685	-4.97416	6.55325e-07	2.51045e-06	S000001584	HSL1_YEAST	P34244
RIM2	YBR192W	300.447	-0.641856	0.129061	-4.97326	6.58352e-07	2.51914e-06	S000000396	RIM2_YEAST	P38127
RAX2	YLR084C	248.421	-0.726527	0.146149	-4.97115	6.65575e-07	2.54532e-06	S000004074	RAX2_YEAST	Q12465
LOT5	YKL183W	579.756	-0.620386	0.125143	-4.95742	7.14346e-07	2.72869e-06	S000001666	LOT5_YEAST	P34234
#N/A	YMR141C	124.093	0.921765	0.185984	4.95616	7.18989e-07	2.74328e-06	S000004749	YM21_YEAST	P40211
#N/A	YOR015W	304.88	0.648935	0.131049	4.95186	7.35085e-07	2.79828e-06	S000005541	YO015_YEAST	Q12169
SAP30	YMR263W	389.793	-0.738642	0.149382	-4.94466	7.62785e-07	2.8971e-06	S000004876	SAP30_YEAST	P38429
LDS1	YAL018C	27.0318	1.54478	0.312808	4.93843	7.87528e-07	2.98937e-06	S000000016	LDS1_YEAST	P31379
RPL27A	YHR010W	22784.7	-0.683279	0.138521	-4.93266	8.11171e-07	3.07386e-06	S000001052	RL27A_YEAST	P0C2H6
YTA12	YMR089C	1276.97	0.663759	0.134583	4.93195	8.14134e-07	3.08333e-06	S000004695	YTA12_YEAST	P40341
#N/A	YBL010C	158.198	-0.845204	0.171513	-4.92792	8.31111e-07	3.14227e-06	S000000106	YBB0_YEAST	P32788
XRN1	YGL173C	2304.52	0.60482	0.12278	4.92603	8.39168e-07	3.16913e-06	S000003141	XRN1_YEAST	P22147
DUR3	YHL016C	163.977	-0.79109	0.160642	-4.92456	8.45487e-07	3.19119e-06	S000001008	DUR3_YEAST	P33413
ERJ5	YFR041C	979.937	-0.613292	0.124735	-4.91675	8.79945e-07	3.30998e-06	S000001937	ERJ5_YEAST	P43613
SHR3	YDL212W	3599.57	-0.595065	0.121051	-4.91582	8.84097e-07	3.32373e-06	S000002371	SHR3_YEAST	Q02774
ATP10	YLR393W	250.12	0.65773	0.133876	4.91298	8.9704e-07	3.37048e-06	S000004385	ATP10_YEAST	P18496
GPA1	YHR005C	948.364	-0.627337	0.127887	-4.90538	9.32459e-07	3.49961e-06	S000001047	GPA1_YEAST	P08539
RIF2	YLR453C	164.251	-0.740815	0.151119	-4.9022	9.4769e-07	3.54678e-06	S000004445	RIF2_YEAST	Q06208
RPC34	YNR003C	711.1	-0.610278	0.124489	-4.90226	9.47389e-07	3.54678e-06	S000005286	RPC6_YEAST	P32910
CRS5	YOR031W	582.021	0.711693	0.145256	4.89957	9.6046e-07	3.59053e-06	S000005557	CRS5_YEAST	P41902
ELG1	YOR144C	152.775	-0.828713	0.169411	-4.89172	9.99593e-07	3.73264e-06	S000005670	ELG1_YEAST	Q12050
MYO1	YHR023W	429.672	-0.58985	0.120692	-4.88721	1.02275e-06	3.81269e-06	S000001065	MYO1_YEAST	P08964
UPS1	YLR193C	914.112	0.651675	0.133533	4.88024	1.05957e-06	3.93453e-06	S000004183	UPS1_YEAST	Q05776
MRC1	YCL061C	324.024	-0.6721	0.137788	-4.87779	1.0728e-06	3.98145e-06	S000000566	MRC1_YEAST	P25588
HTA2	YBL003C	3992.79	-1.9309	0.396172	-4.8739	1.09419e-06	4.05403e-06	S000000099	H2A2_YEAST	P04912
JAC1	YGL018C	333.926	0.647358	0.132955	4.86901	1.12157e-06	4.14856e-06	S000002986	JAC1_YEAST	P53193
TKL1	YPR074C	2787.29	-0.666461	0.136989	-4.86505	1.14426e-06	4.23014e-06	S000006278	TKT1_YEAST	P23254
KIN3	YAR018C	290.424	-0.668699	0.137567	-4.86091	1.16846e-06	4.31242e-06	S000000071	KIN3_YEAST	P22209
PCL2	YDL127W	244.491	-0.764395	0.157324	-4.85873	1.18142e-06	4.35784e-06	S000002285	PCL2_YEAST	P25693
SPC98	YNL126W	288.384	-0.650568	0.134172	-4.84877	1.2423e-06	4.57478e-06	S000005070	SPC98_YEAST	P53540
TRX2	YGR209C	4992.02	0.75101	0.155183	4.83951	1.30159e-06	4.77466e-06	S000003441	TRX2_YEAST	P22803
#N/A	YJL020W-A	264.252	0.707396	0.146286	4.83571	1.32669e-06	4.86135e-06	S000028659	YJ020_YEAST	Q8TGN2
JLP2	YMR132C	325.459	-0.659226	0.136712	-4.82202	1.42112e-06	5.1931e-06	S000004739	JLP2_YEAST	P40206
NCS2	YNL119W	457.028	-0.649745	0.134953	-4.81461	1.47487e-06	5.36888e-06	S000005063	CTU2_YEAST	P53923
#N/A	YJR120W	46.9154	1.20188	0.25006	4.80637	1.53699e-06	5.57976e-06	S000003881	YJ90_YEAST	P47157
NOG2	YNR053C	649.819	-0.625437	0.130275	-4.80091	1.57944e-06	5.72449e-06	S000005336	NOG2_YEAST	P53742
RPS30A	YLR287C-A	31135.5	-0.828061	0.172749	-4.79343	1.63958e-06	5.92955e-06	S000004278	RS30A_YEAST	P0CX33
#N/A	YJR061W	300.182	0.604998	0.126246	4.79221	1.64955e-06	5.96238e-06	S000003822	YJ31_YEAST	P40355
HIS5	YIL116W	2506.44	0.662328	0.138655	4.77682	1.78089e-06	6.42318e-06	S000001378	HIS8_YEAST	P07172
CDC123	YLR215C	159.46	-0.834049	0.174962	-4.76704	1.86953e-06	6.7174e-06	S000004205	CD123_YEAST	Q05791
#N/A	YJL045W	126.16	0.916833	0.192467	4.76359	1.90179e-06	6.82963e-06	S000003581	SDHX_YEAST	P47052
LOA1	YPR139C	1100.14	-0.601321	0.126361	-4.75875	1.94794e-06	6.98028e-06	S000006343	LOA1_YEAST	Q06508
PXL1	YKR090W	465.678	-0.596674	0.125587	-4.7511	2.02318e-06	7.23433e-06	S000001798	PXL1_YEAST	P36166
HOF1	YMR032W	259.578	-0.652375	0.137916	-4.73023	2.24269e-06	7.99775e-06	S000004635	CYK2_YEAST	Q05080
RPL38	YLR325C	19645.1	-0.781505	0.16524	-4.72951	2.25057e-06	8.02157e-06	S000004317	RL38_YEAST	P49167
ARV1	YLR242C	135.777	-0.900428	0.1907	-4.72169	2.33889e-06	8.32743e-06	S000004232	ARV1_YEAST	Q06541
YAP1	YML007W	2554.83	0.616064	0.130731	4.71244	2.44763e-06	8.69138e-06	S000004466	AP1_YEAST	P19880
RMD1	YDL001W	309.562	-0.603415	0.128219	-4.70614	2.52447e-06	8.95469e-06	S000002159	RMD1_YEAST	Q03441
#N/A	YML082W	200.879	-0.682921	0.145125	-4.70573	2.52954e-06	8.96312e-06	S000004547	METX_YEAST	Q04533
#N/A	YIL047C-A	110.873	-0.856681	0.18217	-4.70264	2.56824e-06	9.09055e-06	S000028790	YI047_YEAST	A0A023PYH8
LSG1	YGL099W	441.198	-0.732696	0.156049	-4.69531	2.66203e-06	9.40255e-06	S000003067	LSG1_YEAST	P53145
MRP20	YDR405W	911.41	0.620847	0.132563	4.68342	2.82132e-06	9.94935e-06	S000002813	RM41_YEAST	P32387
LOC1	YFR001W	1959.51	-0.593439	0.126818	-4.67945	2.87648e-06	1.01278e-05	S000001897	LOC1_YEAST	P43586
FEX2	YPL279C	71.8672	-0.949376	0.203664	-4.66149	3.13929e-06	1.10065e-05	S000006200	FEX2_YEAST	Q08991
PET111	YMR257C	314.235	0.715623	0.153685	4.65643	3.21739e-06	1.12723e-05	S000004870	PT111_YEAST	P08468
#N/A	YLL056C	158.89	0.876874	0.188525	4.65124	3.2994e-06	1.15375e-05	S000003979	YL056_YEAST	Q12177
BBP1	YPL255W	91.9315	-0.886515	0.190605	-4.65106	3.30241e-06	1.1542e-05	S000006176	BBP1_YEAST	Q12365
#N/A	YHR214W-A	114.8	0.884214	0.190375	4.6446	3.40729e-06	1.18836e-05	S000003535	YH1A_YEAST	O13534
BNA2	YJR078W	172.266	0.768934	0.166142	4.62817	3.68911e-06	1.28061e-05	S000003839	I23O_YEAST	P47125
CNS1	YBR155W	239.759	-0.622207	0.134502	-4.62601	3.7277e-06	1.29266e-05	S000000359	CNS1_YEAST	P33313
MDM1	YML104C	261.721	-0.610319	0.132098	-4.62021	3.83345e-06	1.32726e-05	S000004572	MDM1_YEAST	Q01846
SOL1	YNR034W	695.472	0.635725	0.13774	4.61541	3.92323e-06	1.35763e-05	S000005317	SOL1_YEAST	P50278
#N/A	YDL009C	302.476	-0.794091	0.172251	-4.61008	4.02511e-06	1.39072e-05	S000002167	YD009_YEAST	Q12210
#N/A	YEL028W	76.702	-0.924987	0.20068	-4.60926	4.04113e-06	1.39553e-05	S000000754	YEC8_YEAST	P39989
RGM1	YMR182C	296.59	0.604743	0.131379	4.60303	4.16391e-06	1.43644e-05	S000004794	RGM1_YEAST	Q00453
OTU2	YHL013C	522.751	-0.658029	0.142966	-4.6027	4.17057e-06	1.43725e-05	S000001005	OTU2_YEAST	P38747
GRX2	YDR513W	5917.9	0.651529	0.141695	4.59812	4.26318e-06	1.46689e-05	S000002921	GLRX2_YEAST	P17695
THI21	YPL258C	161.216	0.743461	0.161739	4.59668	4.29272e-06	1.47553e-05	S000006179	THI21_YEAST	Q08975
EMW1	YNL313C	270.041	-0.648875	0.141182	-4.596	4.30669e-06	1.4788e-05	S000005257	EMW1_YEAST	P42842
RFA3	YJL173C	725.29	-0.835455	0.181961	-4.59139	4.40305e-06	1.51111e-05	S000003709	RFA3_YEAST	P26755
ARL1	YBR164C	1347.81	-0.656144	0.142953	-4.58993	4.43385e-06	1.51933e-05	S000000368	ARL1_YEAST	P38116
IRC19	YLL033W	191.077	-0.634098	0.138177	-4.58903	4.45303e-06	1.52512e-05	S000003956	IRC19_YEAST	Q07843
#N/A	YDR124W	179.988	0.74619	0.162688	4.58663	4.50455e-06	1.54038e-05	S000002531	YD124_YEAST	Q04608
RTT10	YPL183C	380.994	-0.632554	0.137999	-4.58374	4.5673e-06	1.55944e-05	S000006104	WDR6_YEAST	Q08924
MET31	YPL038W	234.651	-0.816203	0.178459	-4.57361	4.79381e-06	1.63259e-05	S000005959	MET31_YEAST	Q03081
#N/A	YOR389W	230.948	0.666432	0.145727	4.57314	4.80461e-06	1.63543e-05	S000005916	YO389_YEAST	Q08912
RPL37B	YDR500C	22605.6	-0.69366	0.151688	-4.57294	4.80937e-06	1.63622e-05	S000002908	RL37B_YEAST	P51402
GEM1	YAL048C	441.708	0.612797	0.134091	4.57001	4.87696e-06	1.65667e-05	S000000046	GEM1_YEAST	P39722
YHI9	YHR029C	1878.8	0.806317	0.176733	4.56234	5.05866e-06	1.71402e-05	S000001071	YHI9_YEAST	P38765
BUD8	YLR353W	146.235	-0.714049	0.156587	-4.56008	5.11351e-06	1.72909e-05	S000004345	BUD8_YEAST	P41698
DBF4	YDR052C	576.718	-0.654489	0.143533	-4.55987	5.11864e-06	1.72994e-05	S000002459	DBF4_YEAST	P32325
ADH4	YGL256W	666.765	-0.740822	0.162562	-4.55716	5.18505e-06	1.75061e-05	S000003225	ADH4_YEAST	P10127
#N/A	YMR135W-A	147.073	0.776348	0.170356	4.55722	5.18354e-06	1.75061e-05	S000004743	YM135_YEAST	Q6B0X1
#N/A	YPL277C	124.499	0.760942	0.16713	4.55301	5.28842e-06	1.7828e-05	S000006198	YP277_YEAST	Q08989
YPK3	YBR028C	234.976	-0.587565	0.129068	-4.55237	5.30448e-06	1.78731e-05	S000000232	YPK3_YEAST	P38070
FEX1	YOR390W	88.2674	-0.864583	0.190398	-4.54092	5.60104e-06	1.88342e-05	S000005917	FEX1_YEAST	Q08913
#N/A	YLR437C-A	230.724	0.658446	0.145225	4.53397	5.78853e-06	1.94254e-05	S000028684	YL37A_YEAST	Q8TGR0
#N/A	YOR161W-B	302.472	0.629731	0.138915	4.53321	5.80933e-06	1.94756e-05	S000028714	YO61B_YEAST	Q8TGL4
PDC6	YGR087C	64.4823	0.934833	0.206503	4.52698	5.98336e-06	2.00388e-05	S000003319	PDC6_YEAST	P26263
SEN15	YMR059W	457.52	-0.786507	0.173852	-4.524	6.06818e-06	2.03127e-05	S000004663	SEN15_YEAST	Q04675
WSS1	YHR134W	531.111	-0.598505	0.132355	-4.52196	6.12704e-06	2.04788e-05	S000001176	WSS1_YEAST	P38838
RIB5	YBR256C	6015.99	0.634209	0.140285	4.52087	6.1585e-06	2.05736e-05	S000000460	RISA_YEAST	P38145
MET14	YKL001C	579.02	-0.657114	0.145968	-4.50179	6.73849e-06	2.241e-05	S000001484	KAPS_YEAST	Q02196
OAC1	YKL120W	685.645	-0.622447	0.138465	-4.49533	6.94632e-06	2.30781e-05	S000001603	OAC1_YEAST	P32332
#N/A	YGR016W	122.688	-0.760606	0.169739	-4.48104	7.42798e-06	2.45072e-05	S000003248	YG1A_YEAST	P53209
RPS10B	YMR230W	16662.4	-0.618793	0.138289	-4.47464	7.65405e-06	2.5228e-05	S000004843	RS10B_YEAST	P46784
#N/A	YOL097W-A	74.1036	-0.993524	0.222079	-4.47375	7.6861e-06	2.53211e-05	S000028854	YO097_YEAST	Q3E7Y9
RHO4	YKR055W	325.989	0.587062	0.131265	4.47235	7.73651e-06	2.54746e-05	S000001763	RHO4_YEAST	Q00246
GIS3	YLR094C	646.452	0.675893	0.151483	4.46185	8.12561e-06	2.66373e-05	S000004084	GIS3_YEAST	Q12418
MET10	YFR030W	723.653	0.75113	0.168593	4.4553	8.37756e-06	2.74092e-05	S000001926	MET10_YEAST	P39692
#N/A	YHR214W	101.494	0.807899	0.181665	4.4472	8.69987e-06	2.8394e-05	S000001257	YH214_YEAST	P0CX19
MET7	YOR241W	411.663	-0.629416	0.14162	-4.44441	8.8133e-06	2.8736e-05	S000005767	FOLE_YEAST	Q08645
SHE2	YKL130C	492.055	-0.59421	0.133763	-4.44225	8.90238e-06	2.90007e-05	S000001613	SHE2_YEAST	P36068
#N/A	YGR050C	160.581	-0.744161	0.167527	-4.44204	8.91097e-06	2.90119e-05	S000003282	YG1X_YEAST	P53231
POP7	YBR167C	573.096	-0.60023	0.135398	-4.43307	9.29011e-06	3.01725e-05	S000000371	POP7_YEAST	P38291
RPP2B	YDR382W	48487.2	-0.695954	0.157417	-4.42109	9.82064e-06	3.18024e-05	S000002790	RLA4_YEAST	P02400
BUD13	YGL174W	386.871	-0.626944	0.141921	-4.41756	9.98192e-06	3.2309e-05	S000003142	CWC26_YEAST	P46947
#N/A	YDL241W	281.683	-0.897528	0.203417	-4.41225	1.02302e-05	3.30164e-05	S000002400	YD241_YEAST	Q07738
CCC2	YDR270W	497.768	0.653804	0.148395	4.40584	1.05376e-05	3.39754e-05	S000002678	ATU2_YEAST	P38995
REC102	YLR329W	98.6346	-0.845207	0.191846	-4.40566	1.0546e-05	3.39862e-05	S000004321	TO6BL_YEAST	Q02721
GRC3	YLL035W	100.611	-0.816403	0.185355	-4.40454	1.06008e-05	3.41463e-05	S000003958	GRC3_YEAST	Q07845
PRP8	YHR165C	881.691	0.596256	0.135404	4.40353	1.06505e-05	3.42897e-05	S000001208	PRP8_YEAST	P33334
MCM21	YDR318W	482.196	-0.616649	0.140302	-4.39515	1.10696e-05	3.56044e-05	S000002726	CENPO_YEAST	Q06675
MPS2	YGL075C	231.052	-0.655728	0.14921	-4.39466	1.10944e-05	3.5667e-05	S000003043	MPS2_YEAST	P53159
MCM3	YEL032W	282.205	-0.595699	0.135571	-4.394	1.11284e-05	3.57591e-05	S000000758	MCM3_YEAST	P24279
#N/A	YNL234W	591.58	0.628223	0.143015	4.39271	1.11946e-05	3.59545e-05	S000005178	YNX4_YEAST	P53857
SCC2	YDR180W	167.475	-0.679017	0.154658	-4.39043	1.13125e-05	3.63157e-05	S000002588	SCC2_YEAST	Q04002
RRN10	YBL025W	207.925	-0.640827	0.146172	-4.38405	1.16495e-05	3.73434e-05	S000000121	RRN10_YEAST	P38204
RRT6	YGL146C	304.329	0.589565	0.134649	4.37853	1.19481e-05	3.82272e-05	S000003114	RRT6_YEAST	P53117
ARG7	YMR062C	4616.55	0.596461	0.136233	4.37824	1.19643e-05	3.82603e-05	S000004666	ARGJ_YEAST	Q04728
SNU23	YDL098C	225.079	-0.649014	0.148376	-4.3741	1.21932e-05	3.8955e-05	S000002256	SNU23_YEAST	Q12368
MDJ2	YNL328C	59.0445	-1.08056	0.247224	-4.37076	1.23813e-05	3.94679e-05	S000005272	MDJ2_YEAST	P42834
#N/A	YAR068W	99.4753	0.844745	0.193295	4.37023	1.24116e-05	3.95389e-05	S000000091	YAN8_YEAST	P39564
POL12	YBL035C	188.585	-0.645838	0.148097	-4.36092	1.29516e-05	4.12002e-05	S000000131	DPOA2_YEAST	P38121
#N/A	YLR299C-A	94.7277	0.885855	0.203434	4.35451	1.33364e-05	4.23432e-05	S000028680	YL299_YEAST	Q8TGM3
MED11	YMR112C	528.267	-0.585297	0.134445	-4.35342	1.34033e-05	4.25353e-05	S000004718	MED11_YEAST	Q99278
#N/A	YCR081C-A	26.2628	1.31059	0.301207	4.35114	1.35433e-05	4.29183e-05	S000028609	YC081_YEAST	Q8TGQ0
#N/A	YPR077C	54.8954	1.01549	0.233413	4.35062	1.35753e-05	4.29789e-05	S000006281	YPR77_YEAST	O13583
GAL3	YDR009W	199.83	0.636985	0.146488	4.34837	1.37152e-05	4.34011e-05	S000002416	GAL3_YEAST	P13045
#N/A	YJR079W	252.367	0.666182	0.153274	4.34636	1.38416e-05	4.37801e-05	S000003840	YJ49_YEAST	P47126
#N/A	YMR194C-A	149.318	-0.655888	0.151043	-4.34239	1.40938e-05	4.45145e-05	S000007250	YM94A_YEAST	P0C5Q6
CLB2	YPR119W	153.209	-0.804165	0.185257	-4.3408	1.41965e-05	4.47753e-05	S000006323	CG22_YEAST	P24869
#N/A	YGR079W	36.9265	-1.14765	0.264395	-4.34068	1.42042e-05	4.47783e-05	S000003311	YG2G_YEAST	P53249
PDR16	YNL231C	883.9	0.749101	0.172586	4.34044	1.42197e-05	4.4806e-05	S000005175	PDR16_YEAST	P53860
CHL1	YPL008W	230.282	-0.635022	0.14646	-4.33581	1.45226e-05	4.56955e-05	S000005929	CHL1_YEAST	P22516
RBG2	YGR173W	429.373	-0.60068	0.138951	-4.32297	1.53945e-05	4.83019e-05	S000003405	RBG2_YEAST	P53295
TPT1	YOL102C	469.018	-0.604574	0.139905	-4.32132	1.55097e-05	4.86406e-05	S000005462	TPT1_YEAST	Q12272
UAF30	YOR295W	240.293	-0.627601	0.145352	-4.31781	1.57582e-05	4.93731e-05	S000005821	UAF30_YEAST	Q08747
2004-09-01	YJL105W	91.9804	-0.843233	0.195485	-4.31355	1.60654e-05	5.02412e-05	S000003641	SET4_YEAST	P42948
KSS1	YGR040W	301.924	-0.618361	0.143453	-4.31056	1.62842e-05	5.08476e-05	S000003272	KSS1_YEAST	P14681
RPS31	YLR167W	143336	-0.626966	0.145451	-4.31048	1.62899e-05	5.08476e-05	S000004157	RS31_YEAST	P05759
COS9	YKL219W	198.171	-0.605177	0.140424	-4.30963	1.63526e-05	5.09956e-05	S000001702	COS9_YEAST	P36034
FLO11	YIR019C	140.639	0.768466	0.178431	4.3068	1.6563e-05	5.16274e-05	S000001458	FLO11_YEAST	P08640
FMP33	YJL161W	581.9	0.637174	0.147965	4.30624	1.66052e-05	5.1735e-05	S000003697	FMP33_YEAST	P46998
PSE1	YMR308C	1076.23	-0.594655	0.138148	-4.30447	1.67385e-05	5.21016e-05	S000004925	IMB3_YEAST	P32337
SEC59	YMR013C	195.723	-0.63342	0.147158	-4.30436	1.67471e-05	5.21037e-05	S000004615	SEC59_YEAST	P20048
#N/A	YFR035C	394.35	-0.666671	0.155071	-4.29914	1.71465e-05	5.32967e-05	S000001931	YFK5_YEAST	P43608
OLE1	YGL055W	2756.15	0.815064	0.190369	4.2815	1.85638e-05	5.7354e-05	S000003023	ACO1_YEAST	P21147
THI2	YBR240C	90.076	-0.832475	0.194513	-4.27979	1.87068e-05	5.77422e-05	S000000444	THI2_YEAST	P38141
KCC4	YCL024W	112.94	-0.814067	0.190272	-4.27843	1.88218e-05	5.79895e-05	S000000529	KCC4_YEAST	P25389
RPL25	YOL127W	42692.1	-0.751839	0.175989	-4.27209	1.93651e-05	5.95807e-05	S000005487	RL25_YEAST	P04456
#N/A	YGR240C-A	151.16	-0.77867	0.182293	-4.27152	1.94144e-05	5.97049e-05	S000028551	YG240_YEAST	Q3E786
#N/A	YAL034C-B	45.5662	-1.06251	0.2488	-4.27055	1.94993e-05	5.99382e-05	S000002137	YA034_YEAST	O13515
PEX31	YGR004W	151.115	-0.717509	0.168162	-4.26676	1.9833e-05	6.08798e-05	S000003236	PEX31_YEAST	P53203
GCV1	YDR019C	229.243	0.782791	0.183623	4.26304	2.01662e-05	6.17887e-05	S000002426	GCST_YEAST	P48015
RRP5	YMR229C	749.54	-0.681632	0.159921	-4.2623	2.02337e-05	6.19669e-05	S000004842	RRP5_YEAST	Q05022
EST1	YLR233C	317.895	-0.594345	0.139617	-4.25697	2.07217e-05	6.33158e-05	S000004223	EST1_YEAST	P17214
SNU56	YDR240C	211.846	-0.585636	0.138022	-4.24307	2.20486e-05	6.72158e-05	S000002648	SNU56_YEAST	Q03782
MSH5	YDL154W	136.061	0.692616	0.163269	4.24216	2.21376e-05	6.74564e-05	S000002313	MSH5_YEAST	Q12175
RAD5	YLR032W	243.488	-0.657107	0.154904	-4.24204	2.21498e-05	6.74625e-05	S000004022	RAD5_YEAST	P32849
#N/A	YFR032C-B	16.5903	-1.52038	0.358686	-4.23875	2.24771e-05	6.84282e-05	S000028630	YF032_YEAST	Q8TGU2
FAA3	YIL009W	159.734	-0.801711	0.189273	-4.23574	2.27796e-05	6.93175e-05	S000001271	LCF3_YEAST	P39002
#N/A	YAR066W	95.2426	0.79124	0.186959	4.23216	2.31462e-05	7.03366e-05	S000002144	YA066_YEAST	P0CX18
SBH2	YER019C-A	3456.91	-0.659303	0.15613	-4.22279	2.41301e-05	7.30929e-05	S000002127	SC6B2_YEAST	P52871
YIP3	YNL044W	1673.02	-0.748045	0.177491	-4.21456	2.50266e-05	7.55335e-05	S000004989	PRA1_YEAST	P53633
HXT10	YFL011W	59.9898	0.906225	0.215891	4.19761	2.69744e-05	8.11914e-05	S000001883	HXT10_YEAST	P43581
ERP1	YAR002C-A	3913.46	-0.626284	0.149836	-4.1798	2.91769e-05	8.74256e-05	S000002129	ERP1_YEAST	Q05359
#N/A	YML034C-A	160.079	0.712914	0.171071	4.16735	3.08155e-05	9.20868e-05	S000004499	YM034_YEAST	A0A023PXP7
MER1	YNL210W	130.151	-0.750282	0.180121	-4.16545	3.10746e-05	9.27778e-05	S000005154	MER1_YEAST	P16523
FRS2	YFL022C	1301.69	-0.591561	0.14206	-4.16417	3.12484e-05	9.32132e-05	S000001872	SYFA_YEAST	P15625
AHP1	YLR109W	26048.4	0.613162	0.147766	4.14955	3.33126e-05	9.89092e-05	S000004099	AHP1_YEAST	P38013
#N/A	YJL047C-A	26.7022	-1.33944	0.322925	-4.14784	3.35624e-05	9.95803e-05	S000028804	YJ047_YEAST	Q3E737
#N/A	YCR099C	126.811	0.725095	0.174904	4.14567	3.38817e-05	0.000100483	S000000696	YCY9_YEAST	P25657
#N/A	YPL108W	167.08	-0.630144	0.152128	-4.14221	3.43981e-05	0.000101878	S000006029	YP108_YEAST	Q02872
ERG11	YHR007C	1889.87	-0.598345	0.144612	-4.1376	3.50959e-05	0.000103899	S000001049	CP51_YEAST	P10614
FUN30	YAL019W	209.693	-0.728094	0.176376	-4.12809	3.65796e-05	0.00010786	S000000017	FUN30_YEAST	P31380
THI72	YOR192C	72.4344	1.00212	0.243538	4.11482	3.87488e-05	0.000114131	S000005718	THI72_YEAST	Q08579
NBL1	YHR199C-A	135.717	0.730092	0.177522	4.11268	3.91093e-05	0.000115064	S000029704	NBL1_YEAST	Q3E7Y6
MCM6	YGL201C	229.626	-0.592964	0.144211	-4.11177	3.92633e-05	0.000115466	S000003169	MCM6_YEAST	P53091
#N/A	YNL043C	947.824	-0.730237	0.177845	-4.10603	4.02518e-05	0.00011806	S000004988	YNE3_YEAST	P53957
ROG1	YGL144C	128.014	-0.690697	0.168365	-4.10237	4.08936e-05	0.000119784	S000003112	ROG1_YEAST	P53118
URB2	YJR041C	216.003	-0.604489	0.147682	-4.09316	4.25527e-05	0.000124261	S000003802	URB2_YEAST	P47108
SKG6	YHR149C	134.9	-0.661784	0.162396	-4.07511	4.59917e-05	0.000133798	S000001192	SKG6_YEAST	P32900
#N/A	YNL146C-A	94.3614	-0.769728	0.189486	-4.06219	4.86147e-05	0.000140851	S000028851	YN146_YEAST	Q3E7Z1
HMX1	YLR205C	2936.37	0.812327	0.200593	4.04963	5.12986e-05	0.000148112	S000004195	HMX1_YEAST	P32339
NFT1	YKR103W	77.9487	0.881676	0.217898	4.04627	5.20395e-05	0.000149991	S000001811	NFT1_YEAST	P0CE68
#N/A	YHL026C	121.621	-0.660176	0.163229	-4.04447	5.24414e-05	0.000150953	S000001018	YHC6_YEAST	P38740
#N/A	YLR347W-A	61.6091	0.923613	0.228662	4.03921	5.36319e-05	0.000154313	S000028681	YL347_YEAST	Q8TGM2
#N/A	YDR461C-A	317.788	0.672214	0.166508	4.03712	5.41108e-05	0.000155624	S000087209	YD461_YEAST	Q2V2P7
#N/A	YAL016C-B	40.0781	1.11094	0.278113	3.99456	6.48148e-05	0.000183789	S000028528	YA016_YEAST	P0C1V3
CWC21	YDR482C	574.06	-0.633142	0.158633	-3.99124	6.57285e-05	0.000186063	S000002890	CWC21_YEAST	Q03375
GEP5	YLR091W	166.278	-0.645112	0.161638	-3.9911	6.57681e-05	0.000186096	S000004081	GEP5_YEAST	Q12393
CDC20	YGL116W	259.144	-0.613005	0.153644	-3.98979	6.61328e-05	0.000186969	S000003084	CDC20_YEAST	P26309
RPL42B	YHR141C	28098.9	-0.728229	0.182559	-3.989	6.63534e-05	0.000187513	S000001183	RL44B_YEAST	P0CX28
EMP24	YGL200C	3488.49	-0.591267	0.148437	-3.98328	6.79701e-05	0.000191513	S000003168	EMP24_YEAST	P32803
#N/A	YIL105W-A	146.538	0.652737	0.163998	3.98014	6.8874e-05	0.00019365	S000028657	YI105_YEAST	Q8TGN5
ZIM17	YNL310C	399.326	-0.643247	0.162889	-3.94898	7.84839e-05	0.000219005	S000005254	ZIM17_YEAST	P42844
MMT1	YMR177W	170.616	-0.622698	0.157693	-3.94879	7.8546e-05	0.000219086	S000004789	MMT1_YEAST	Q03218
#N/A	YDR366C	68.9604	-0.819452	0.20798	-3.94006	8.14614e-05	0.000226365	S000002774	YD366_YEAST	P87287
#N/A	YOR282W	155.906	-0.606699	0.154088	-3.93735	8.23861e-05	0.000228839	S000005808	YO282_YEAST	Q08741
RPP1A	YDL081C	36324.3	-0.699566	0.177953	-3.93119	8.45258e-05	0.000234391	S000002239	RLA1_YEAST	P05318
RAD53	YPL153C	81.2469	-0.765599	0.19601	-3.90593	9.38648e-05	0.000258779	S000006074	RAD53_YEAST	P22216
#N/A	YER165C-A	105.153	-0.672824	0.172329	-3.9043	9.44993e-05	0.000260421	S000028762	YE165_YEAST	A0A023PZH1
#N/A	YGL188C-A	26.8509	-1.21272	0.311385	-3.89459	9.83664e-05	0.000269849	S000028635	YG188_YEAST	Q8TGU1
MPD1	YOR288C	485.968	-0.617893	0.158697	-3.89354	9.87926e-05	0.000270907	S000005814	MPD1_YEAST	Q12404
MRS1	YIR021W	143.859	-0.629067	0.161602	-3.8927	9.91357e-05	0.000271674	S000001460	MRS1_YEAST	P07266
MTR4	YJL050W	410.223	-0.750898	0.193024	-3.89017	0.000100172	0.000274238	S000003586	MTR4_YEAST	P47047
#N/A	YNL276C	104.377	0.764845	0.196627	3.88983	0.000100315	0.000274516	S000005220	YN16_YEAST	P53837
HIS4	YCL030C	4380	0.608093	0.157426	3.86273	0.000112127	0.000304215	S000000535	HIS2_YEAST	P00815
NEL1	YHR035W	122.573	-0.698977	0.181278	-3.85583	0.000115339	0.000312547	S000001077	NEL1_YEAST	P38769
RAD52	YML032C	738.421	0.596605	0.154778	3.85458	0.000115928	0.000314015	S000004494	RAD52_YEAST	P06778
EST2	YLR318W	120.172	-0.656327	0.1713	-3.83145	0.000127388	0.000342965	S000004310	TERT_YEAST	Q06163
CYC7	YEL039C	10497.1	0.626262	0.163708	3.82547	0.000130521	0.000350691	S000000765	CYC7_YEAST	P00045
#N/A	YGR107W	15.1823	-1.40706	0.368229	-3.82116	0.000132823	0.000356254	S000003339	YG2U_YEAST	P53263
FLX1	YIL134W	87.9257	-0.767979	0.201282	-3.81543	0.000135944	0.000363353	S000001396	FLX1_YEAST	P40464
CAF120	YNL278W	292.415	-0.597298	0.156771	-3.81	0.000138969	0.000370844	S000005222	CA120_YEAST	P53836
#N/A	YDR179W-A	144.5	-0.616209	0.162045	-3.80269	0.000143133	0.000381651	S000002587	YD179_YEAST	Q03983
PPT2	YPL148C	179.839	-0.626183	0.166067	-3.77067	0.000162811	0.000429816	S000006069	PPT2_YEAST	Q12036
RNR3	YIL066C	139.374	0.598445	0.158834	3.76773	0.000164738	0.000434043	S000001328	RIR3_YEAST	P21672
TSR1	YDL060W	463.896	-0.622817	0.165927	-3.75357	0.000174336	0.000457881	S000002218	TSR1_YEAST	Q07381
#N/A	YOR343C	49.686	0.878937	0.235118	3.73829	0.000185278	0.000484898	S000005870	YO343_YEAST	Q12484
NEJ1	YLR265C	396.837	-0.600285	0.160763	-3.73399	0.000188473	0.000492098	S000004255	NEJ1_YEAST	Q06148
NSL1	YPL233W	562.298	-0.600182	0.160943	-3.72916	0.00019212	0.000500836	S000006154	NSL1_YEAST	Q12143
DAD1	YDR016C	405.634	-0.674901	0.181632	-3.71577	0.000202589	0.000524227	S000002423	DAD1_YEAST	Q12248
TAD2	YJL035C	123.103	-0.623044	0.167946	-3.70979	0.000207427	0.000535707	S000003572	TAD2_YEAST	P47058
#N/A	YDL211C	76.3047	-0.737841	0.199249	-3.7031	0.000212979	0.000549406	S000002370	YD211_YEAST	Q12121
#N/A	YGR265W	80.2577	-0.748742	0.203065	-3.68721	0.000226725	0.000582831	S000003497	YG5K_YEAST	P53325
PTH1	YHR189W	128.786	0.611812	0.166269	3.67966	0.000233549	0.000598987	S000001232	PTH_YEAST	P38876
#N/A	YJR011C	421.885	-0.692404	0.188254	-3.67802	0.000235049	0.000602139	S000003772	YJY1_YEAST	P47086
DIT2	YDR402C	48.0152	0.86958	0.236474	3.67728	0.000235734	0.00060366	S000002810	CP56_YEAST	P21595
PZF1	YPR186C	120.21	-0.636369	0.173285	-3.67238	0.000240298	0.000614403	S000006390	TF3A_YEAST	P39933
KIN4	YOR233W	151.274	-0.699755	0.192962	-3.62639	0.000287417	0.000728415	S000005759	KIN4_YEAST	Q01919
#N/A	YAL037W	80.5393	-0.694681	0.192131	-3.61567	0.00029957	0.000757516	S000000035	YAD7_YEAST	P39728
#N/A	YBL081W	121.189	-0.691299	0.191656	-3.60698	0.000309777	0.000779771	S000000177	YBI1_YEAST	P38180
#N/A	YKL131W	39.7093	-0.912448	0.253466	-3.59989	0.000318357	0.000798351	S000001614	YKN1_YEAST	P36067
#N/A	YOL037C	151.493	0.645153	0.179898	3.58622	0.000335503	0.000839137	S000005397	YO037_YEAST	Q08205
#N/A	YDL186W	106.665	-0.635195	0.179042	-3.54774	0.000388556	0.000959216	S000002345	YD186_YEAST	P48568
ZDS2	YML109W	226.599	-0.589761	0.166488	-3.54236	0.000396567	0.000977544	S000004577	ZDS2_YEAST	P54786
#N/A	YNL162W-A	65.0122	-0.74104	0.209607	-3.53538	0.000407184	0.00100297	S000007624	YN162_YEAST	Q3E7A8
RRT16	YNL105W	77.0272	-0.706978	0.2001	-3.53312	0.000410681	0.00101084	S000005049	RRT16_YEAST	P50943
#N/A	YER107W-A	107.196	-0.637536	0.180538	-3.53131	0.000413505	0.00101628	S000028755	YE107_YEAST	A0A023PXJ7
SGA1	YIL099W	170.527	0.589886	0.167183	3.52838	0.000418109	0.00102684	S000001361	AMYG_YEAST	P08019
#N/A	YHR007C-A	115.028	0.755209	0.215596	3.50288	0.000460252	0.00112165	S000028830	YH007_YEAST	Q07074
#N/A	YJL136W-A	8.52025	-1.49099	0.425832	-3.50136	0.000462891	0.00112685	S000028806	YJ136_YEAST	Q3E801
AHT1	YHR093W	21.1783	-1.12247	0.32275	-3.47784	0.000505478	0.00122247	S000001135	AHT1_YEAST	P29589
#N/A	YBR296C-A	12.1135	1.41279	0.406993	3.4713	0.00051795	0.00124946	S000028605	YB296_YEAST	Q8TGU5
#N/A	YJL015C	110.036	0.624678	0.181705	3.43787	0.000586303	0.00140216	S000003552	YJB5_YEAST	P47073
HIT1	YJR055W	79.8639	-0.664132	0.194285	-3.41833	0.000630067	0.00149714	S000003816	HIT1_YEAST	P46973
CKS1	YBR135W	219.935	-0.585479	0.17182	-3.40752	0.000655563	0.00155218	S000000339	CKS1_YEAST	P20486
MHT1	YLL062C	146.669	0.603074	0.177045	3.40633	0.000658432	0.00155842	S000003985	MHT1_YEAST	Q12525
#N/A	YLR163W-A	115.917	0.601458	0.177348	3.39139	0.00069538	0.00163541	S000028844	YL163_YEAST	P0C5P6
#N/A	YOR385W	2310.97	-0.666559	0.198049	-3.36563	0.000763701	0.00178286	S000005912	YO385_YEAST	Q08909
#N/A	YIR018C-A	47.5492	0.841443	0.251888	3.34054	0.000836154	0.00193706	S000028837	YI018_YEAST	Q3E7Z3
#N/A	YOR073W-A	46.0091	-0.843035	0.252504	-3.3387	0.000841727	0.00194862	S000028583	YO73A_YEAST	P0C5R3
MEI4	YER044C-A	72.3036	-0.67981	0.203654	-3.33807	0.000843631	0.00195133	S000001954	MEI4_YEAST	P29467
#N/A	YJL181W	99.0873	-0.61764	0.185639	-3.32709	0.000877573	0.00202176	S000003717	YJS1_YEAST	P46987
#N/A	YOR114W	157.91	-0.591497	0.178361	-3.3163	0.000912172	0.00209567	S000005640	YORA4_YEAST	Q12219
#N/A	YAL065C	46.9454	0.774791	0.233977	3.3114	0.0009283	0.00212978	S000001817	YA065_YEAST	O13511
#N/A	YLR334C	54.9871	-0.796261	0.24139	-3.29865	0.000971501	0.00221972	S000004326	YL334_YEAST	Q06127
SPB1	YCL054W	304.886	-0.605437	0.185389	-3.26577	0.00109169	0.00247142	S000000559	SPB1_YEAST	P25582
SPO11	YHL022C	65.8285	-0.681452	0.210417	-3.23858	0.00120125	0.00269289	S000001014	SPO11_YEAST	P23179
GEX1	YCL073C	64.6262	0.67694	0.21015	3.22122	0.00127647	0.00284715	S000000575	GEX1_YEAST	P25596
DAD2	YKR083C	261.094	-0.626884	0.195335	-3.20927	0.0013307	0.0029582	S000001791	DAD2_YEAST	P36162
#N/A	YOR318C	41.4005	-0.822204	0.256291	-3.20808	0.00133622	0.00296566	S000005845	YO318_YEAST	Q99318
RSA4	YCR072C	74.1266	-0.674675	0.210498	-3.20514	0.00134997	0.00299204	S000000668	NLE1_YEAST	P25382
#N/A	YOR161W-A	94.9549	0.636985	0.199386	3.19474	0.00139958	0.00309376	S000028713	YO61A_YEAST	Q8TGL5
#N/A	YFR034W-A	50.196	-0.775226	0.242695	-3.19423	0.00140202	0.00309813	S000028631	YF034_YEAST	Q8TGR2
SPS4	YOR313C	23.6943	-1.10529	0.349201	-3.16521	0.00154973	0.00339747	S000005840	SPS4_YEAST	P09937
#N/A	YIR030W-A	75.1606	-0.623828	0.197679	-3.15577	0.00160076	0.00349553	S000028802	YI30A_YEAST	A0A023PZK4
#N/A	YER188W	55.7399	-0.734003	0.232949	-3.15091	0.00162761	0.00354602	S000000990	YE18_YEAST	P40103
#N/A	YFR056C	84.7319	-0.607269	0.194936	-3.11522	0.00183807	0.00395919	S000001951	YFM6_YEAST	P43624
AAC3	YBR085W	30.1684	-0.877376	0.284365	-3.08539	0.00203285	0.00434082	S000000289	ADT3_YEAST	P18238
#N/A	YBL044W	4.19658	-1.41373	0.464785	-3.04168	0.00235265	0.00496008	S000000140	YBE4_YEAST	P38194
#N/A	YBR221W-A	39.2251	0.794433	0.261361	3.0396	0.00236895	0.00498971	S000028817	YB221_YEAST	Q3E781
#N/A	YGR025W	32.5207	-0.874204	0.288252	-3.03277	0.00242317	0.00509746	S000003257	YG1H_YEAST	P53216
#N/A	YDR401W	31.2393	0.843165	0.278625	3.02617	0.00247677	0.00520199	S000002809	YD401_YEAST	O13523
#N/A	YIL141W	20.5388	-0.972921	0.326598	-2.97896	0.00289233	0.00599724	S000001403	YIO1_YEAST	P40461
#N/A	YOR314W	4.02529	-1.37871	0.464597	-2.96754	0.00300196	0.00620781	S000005841	YO314_YEAST	Q12506
#N/A	YMR175W-A	15.4165	1.127	0.380482	2.96203	0.00305619	0.00630559	S000028848	YM175_YEAST	Q3E766
DGR1	YNL130C-A	11.3611	-1.144	0.387966	-2.9487	0.00319113	0.00656162	S000028579	DGR1_YEAST	Q3E808
#N/A	YPL278C	41.9555	0.720063	0.2449	2.94023	0.00327966	0.0067229	S000006199	YP278_YEAST	Q08990
VEL1	YGL258W	44.4817	-0.798002	0.273847	-2.91405	0.00356777	0.00725984	S000003227	VEL1_YEAST	P53058
#N/A	YDR344C	55.158	-0.675922	0.232786	-2.90362	0.0036888	0.00747643	S000002752	YD344_YEAST	Q05510
#N/A	YDR015C	25.9583	0.869245	0.301651	2.88163	0.00395627	0.00798933	S000002422	YD015_YEAST	Q12195
PAU5	YFL020C	49.3507	0.66687	0.232059	2.87371	0.00405684	0.00817012	S000001874	PAU5_YEAST	P43575
#N/A	YHR032W-A	36.6786	-0.785318	0.273479	-2.87159	0.00408418	0.00821276	S000028831	YH32A_YEAST	P0C5N6
JJJ3	YJR097W	30.8663	-0.862886	0.300743	-2.86918	0.00411539	0.00827053	S000003858	DPH4_YEAST	P47138
HED1	YDR014W-A	50.2724	0.68022	0.237843	2.85995	0.00423709	0.00849459	S000113613	HED1_YEAST	Q03937
HUG1	YML058W-A	67.5754	-0.625208	0.218766	-2.85788	0.00426481	0.00853475	S000007472	HUG1_YEAST	Q6Q5K6
#N/A	YFL019C	104.573	0.586023	0.205467	2.85214	0.00434254	0.00867896	S000001875	YFB9_YEAST	P43576
PEX9	YMR018W	53.5212	-0.652667	0.232858	-2.80285	0.00506533	0.00998075	S000004620	PEX9_YEAST	Q04364
#N/A	YGL194C-A	147.924	-0.588001	0.210612	-2.79187	0.00524045	0.0102893	S000087160	YG194_YEAST	Q2V2P6
#N/A	YGR035W-A	55.7273	-0.621742	0.223799	-2.77813	0.00546735	0.0107095	S000028827	YG035_YEAST	Q45U48
#N/A	YOR392W	13.1279	1.04969	0.378351	2.77438	0.00553068	0.0108195	S000005919	YO392_YEAST	Q08915
SRT1	YMR101C	46.2533	-0.662517	0.239844	-2.76229	0.00573978	0.0111937	S000004707	SRT1_YEAST	Q03175
#N/A	YCL001W-A	39.6956	-0.72399	0.265806	-2.72375	0.00645456	0.0124311	S000007221	YC01A_YEAST	P87012
SRL4	YPL033C	44.8929	-0.651622	0.2399	-2.71622	0.00660311	0.0126879	S000005954	SRL4_YEAST	Q03085
TRF5	YNL299W	60.8165	-0.706385	0.260551	-2.71112	0.00670558	0.0128736	S000005243	TRF5_YEAST	P48561
OAR1	YKL055C	52.8755	-0.649483	0.239625	-2.71042	0.00671982	0.0128935	S000001538	FABG_YEAST	P35731
#N/A	YOL038C-A	76.6283	-0.625298	0.233566	-2.67718	0.00742443	0.0141113	S000028812	YO038_YEAST	Q3E7Z9
#N/A	YJL182C	6.82331	-1.19305	0.446847	-2.66993	0.00758663	0.0143908	S000003718	YJS2_YEAST	P46986
#N/A	YHR139C-A	36.8108	-0.725313	0.27453	-2.64201	0.00824148	0.0155049	S000003533	YH139_YEAST	O13536
BUD26	YDR241W	86.0989	-0.654712	0.248088	-2.63904	0.0083142	0.0156284	S000002649	BUD26_YEAST	Q03783
#N/A	YBR174C	19.6731	-0.889393	0.337312	-2.63671	0.00837147	0.0157139	S000000378	YB24_YEAST	P38294
#N/A	YER175W-A	35.8816	-0.7541	0.289962	-2.60068	0.00930392	0.0172839	S000028625	YE175_YEAST	Q8TGU4
#N/A	YCR001W	42.4188	-0.640987	0.247175	-2.59325	0.00950742	0.0176423	S000000594	YCP2_YEAST	P25347
#N/A	YBR232C	43.3914	-0.622179	0.240268	-2.58952	0.00961084	0.0178143	S000000436	YB82_YEAST	P38327
#N/A	YHR028W-A	90.9333	0.650664	0.25209	2.58108	0.00984919	0.0182307	S000028776	YH028_YEAST	A0A023PXE8
#N/A	YHR213W-B	29.3759	0.745154	0.29066	2.56366	0.0103575	0.0190287	S000028652	YH21B_YEAST	Q8TGK1
#N/A	YDR010C	21.5104	-0.810021	0.31734	-2.55253	0.0106943	0.0195719	S000002417	YDR10_YEAST	Q12426
#N/A	YDR271C	50.835	0.699128	0.276799	2.52576	0.0115448	0.0209786	S000002679	YD271_YEAST	P87282
#N/A	YIR020W-A	22.1103	0.808634	0.320324	2.52442	0.0115888	0.0210412	S000007241	YI20A_YEAST	Q03886
SNZ1	YMR096W	2266.63	0.860566	0.3446	2.49729	0.0125148	0.0225198	S000004702	SNZ1_YEAST	Q03148
#N/A	YKL115C	36.357	-0.717896	0.287821	-2.49425	0.0126225	0.0226831	S000001598	YKL5_YEAST	P36073
#N/A	YMR013C-A	45.1152	-0.630261	0.252875	-2.49238	0.0126891	0.0227903	S000028847	YM13C_YEAST	P0C5Q3
#N/A	YER084W	33.7521	0.659	0.265252	2.48443	0.012976	0.0232681	S000000886	YER4_YEAST	P40057
#N/A	YBR196C-A	9.52117	-1.03458	0.417295	-2.47925	0.013166	0.0235706	S000028534	YB96A_YEAST	Q3E820
#N/A	YDL163W	18.2967	-0.82673	0.334822	-2.46916	0.013543	0.0241871	S000002322	YD163_YEAST	Q12148
ATP6	Q0085	3.34296	-1.08613	0.440783	-2.46409	0.013736	0.0245025	S000007268	ATP6_YEAST	P00854
#N/A	YKR104W	22.3197	0.841436	0.343806	2.44742	0.0143884	0.0255461	S000001812	YK104_YEAST	P0CE69
#N/A	YBR109W-A	32.031	0.674229	0.278096	2.42445	0.0153317	0.0270415	S000028737	YB09A_YEAST	P90471
#N/A	YBR196C-B	26.3569	-0.833076	0.34363	-2.42434	0.0153362	0.0270415	S000028816	YB96B_YEAST	Q3E778
RRT5	YFR032C	8.81795	-1.06164	0.439142	-2.41752	0.0156265	0.027495	S000001928	RRT5_YEAST	P43607
#N/A	YDR442W	42.9755	0.611366	0.253841	2.40846	0.0160199	0.0281426	S000002850	YD442_YEAST	P87270
#N/A	YJL043W	39.1193	-0.609352	0.260589	-2.33836	0.0193686	0.0333996	S000003579	YJE3_YEAST	P47053
#N/A	YDR102C	12.0171	-0.90763	0.389968	-2.32745	0.0199415	0.0343253	S000002509	YD102_YEAST	Q03864
PAU16	YKL224C	5.5729	1.04286	0.450766	2.31353	0.0206937	0.0354734	S000001707	PAU16_YEAST	P35994
#N/A	YBR072C-A	1.56572	-0.953798	0.416906	-2.2878	0.0221489	0.0377347	S000028532	YB072_YEAST	Q3E794
#N/A	YOL160W	20.238	-0.734629	0.321689	-2.28367	0.0223912	0.0381086	S000005520	YO160_YEAST	Q08321
GMC2	YLR445W	9.70262	-0.94968	0.419542	-2.26361	0.0235982	0.0399891	S000004437	GMC2_YEAST	Q06201
#N/A	YEL008W	25.8277	-0.700257	0.310763	-2.25334	0.0242374	0.0409992	S000000734	YEA8_YEAST	P40001
CSM4	YPL200W	31.9831	0.646246	0.287728	2.24603	0.0247021	0.0416629	S000006121	CSM4_YEAST	Q08955
PAU15	YIR041W	17.8255	0.816525	0.364039	2.24296	0.0248991	0.0419586	S000001480	PAU15_YEAST	P40585
#N/A	YOR072W	24.0837	-0.717449	0.320758	-2.23673	0.0253043	0.042609	S000005598	YOR72_YEAST	Q08486
#N/A	YLR157W-E	9.67244	-0.895726	0.401778	-2.2294	0.0257871	0.0432905	S000028678	YL57E_YEAST	P0CF00
HXT14	YNL318C	19.351	0.743803	0.334694	2.22234	0.0262606	0.0439858	S000005262	HXT14_YEAST	P42833
SSP2	YOR242C	24.0928	-0.671522	0.307146	-2.18633	0.0287915	0.0477444	S000005768	SSP2_YEAST	Q08646
#N/A	YDR095C	13.6044	-0.827161	0.38122	-2.16977	0.0300242	0.0495417	S000002502	YD095_YEAST	Q03831
#N/A	YGR226C	15.1913	0.803858	0.371096	2.16617	0.0302979	0.0499562	S000003458	YG4T_YEAST	P50083

## Sheet: 58F_27notsharedwithCPTH2
gene_name	ensembl_id	baseMean	log2FoldChange	lfcSE	stat	pvalue	padj	sgd_id	SwissProt_entry	uniprot
#N/A	YIR042C	281.779	-1.65958	0.11362	-14.6065	0	0	S000001481	YIW2_YEAST	P40586
#N/A	YDR183C-A	36.2442	-0.84352	0.207514	-4.06487	4.80589e-05	0.000246399	S000028540	YD83A_YEAST	P0C5M3
NOG1	YPL093W	667.571	-0.809895	0.0864451	-9.36889	0	0	S000006014	NOG1_YEAST	Q02892
BRE5	YNR051C	459.203	-0.793721	0.0928593	-8.54757	0	0	S000005334	BRE5_YEAST	P53741
#N/A	YBR238C	160.043	-0.750028	0.13505	-5.55371	2.79665e-08	2.67996e-07	S000000442	RMD9L_YEAST	P38330
RRP12	YPL012W	328.536	-0.70878	0.10604	-6.68406	0	3.77539e-10	S000005933	RRP12_YEAST	Q12754
RPC82	YPR190C	217.341	-0.684503	0.124576	-5.49468	3.91427e-08	3.63585e-07	S000006394	RPC3_YEAST	P32349
DBP6	YNR038W	235.402	-0.681739	0.116494	-5.85211	4.85372e-09	5.26703e-08	S000005321	DBP6_YEAST	P53734
PWP1	YLR196W	667.353	-0.622896	0.0871628	-7.14635	0	0	S000004186	PWP1_YEAST	P21304
SST2	YLR452C	261.645	-0.619787	0.110334	-5.61736	1.93897e-08	1.91028e-07	S000004444	SST2_YEAST	P11972
UTP14	YML093W	620.749	-0.618059	0.100752	-6.13447	8.54429e-10	1.07775e-08	S000004558	UTP14_YEAST	Q04500
#N/A	YKL053W	91.2651	-0.605785	0.158397	-3.82448	0.000131046	0.000594933	S000001536	YKF3_YEAST	P35733
DRS1	YLL008W	965.586	-0.602329	0.0846037	-7.11942	0	0	S000003931	DRS1_YEAST	P32892
DPH2	YKL191W	571.451	-0.596269	0.0949139	-6.28221	3.33801e-10	4.47307e-09	S000001674	DPH2_YEAST	P32461
SYG1	YIL047C	459.907	-0.592406	0.0911443	-6.49966	0	1.19145e-09	S000001309	SYG1_YEAST	P40528
NAF1	YNL124W	241.523	-0.591904	0.11784	-5.02296	5.08811e-07	3.85954e-06	S000005068	NAF1_YEAST	P53919
SAP185	YJL098W	439.06	-0.588295	0.0947542	-6.20864	5.34464e-10	7.02076e-09	S000003634	SA185_YEAST	P40856
RRD2	YPL152W	744.609	0.612493	0.0787522	7.77746	0	0	S000006073	PTPA2_YEAST	Q12461
ECM15	YBL001C	3795.78	0.623289	0.0635106	9.81394	0	0	S000000097	ECM15_YEAST	P35195
GPM2	YDL021W	705.521	0.625131	0.0831716	7.51616	0	0	S000002179	PMG2_YEAST	Q12008
HOR7	YMR251W-A	18479.1	0.626605	0.0825123	7.59408	0	0	S000004864	HOR7_YEAST	Q05827
WIP1	YDR374W-A	576.969	0.626706	0.0868436	7.21649	0	0	S000113553	CENPW_YEAST	Q2V2P8
COX13	YGL191W	6932.24	0.634814	0.0630941	10.0614	0	0	S000003159	COX13_YEAST	P32799
COX12	YLR038C	4113.61	0.664107	0.0675532	9.83088	0	0	S000004028	COX12_YEAST	Q01519
ALG13	YGL047W	912.971	0.665264	0.0813695	8.17584	0	0	S000003015	ALG13_YEAST	P53178
MXR2	YCL033C	1184.48	0.679548	0.0768586	8.84153	0	0	S000000538	MXR2_YEAST	P25566
COX7	YMR256C	2464.5	0.748335	0.0739244	10.123	0	0	S000004869	COX7_YEAST	P10174
